# Supplementary material for: CRISPR/Cas9 in Leishmania mexicana: A case study of LmxBTN1
Source: PLoS One. 2018 Feb 13;13(2):e0192723. doi: 10.1371/journal.pone.0192723 (PMC5811015; doi:10.1371/journal.pone.0192723)
Supplement: S2 Table — (XLSX) [file pone.0192723.s011.xlsx]

## Sheet: Sheet1
	LMJLV39_060020000 | Leishmania major strain LV39c5 | CLN3 protein, putative | protein |	LmjF.06.1300 | Leishmania major strain Friedlin | CLN3 protein, putative | protein |	LmjF.22.0010 | Leishmania major strain Friedlin | CLN3 protein, putative | protein |	LMJSD75_220005000 | Leishmania major strain SD 75.1 | CLN3 protein, putative | protein |	LGELEM452_060018500 | Leishmania gerbilli strain LEM452 | CLN3 protein, putative | protein |	LARLEM1108_220005000 | Leishmania arabica strain LEM1108 | CLN3 protein, putative | protein |	LTRL590_060018900 | Leishmania tropica L590 | CLN3 protein, putative | protein |	LinJ.06.1360 | Leishmania infantum JPCM5 | CLN3 protein, putative | protein |	LdBPK_061360.1 | Leishmania donovani BPK282A1 | CLN3 protein, putative | protein |	LmxM.22.0010 | Leishmania mexicana MHOM/GT/2001/U1103 | CLN3 protein, putative | protein |	LbrM.22.0010 | Leishmania braziliensis MHOM/BR/75/M2904 | CLN3 protein, putative | protein |	LBRM2903_220005200 | Leishmania braziliensis MHOM/BR/75/M2903 | CLN3 protein, putative | protein |	LPAL13_220005100 | Leishmania panamensis MHOM/COL/81/L13 | CLN3 protein, putative | protein |	LMARLEM2494_220005000 | Leishmania sp. MAR LEM2494 | CLN3 protein, putative | protein |	EMOLV88_220005000 | Endotrypanum monterogeii strain LV88 | CLN3 protein, putative | protein |	Baya_003_0600 | Blechomonas ayalai B08-376 | hypothetical protein, conserved | protein |	CFAC1_030012700 | Crithidia fasciculata strain Cf-Cl | CLN3 protein, putative | protein |	LpyrH10_24_0520 | Leptomonas pyrrhocoris H10 | hypothetical protein, conserved | protein |	Lsey_0580_0010 | Leptomonas seymouri ATCC 30220 | hypothetical protein conserved | protein |
LMJLV39_060020000 | Leishmania major strain LV39c5 | CLN3 protein, putative | protein |		100	100	99.53	97.66	96.88	93.3	91.43	91.28	89.1	76.83	76.67	75.27	73.6	51.53	42.75	36.63	36.68	39.56
LmjF.06.1300 | Leishmania major strain Friedlin | CLN3 protein, putative | protein |	100		100	99.53	97.66	96.88	93.3	91.43	91.28	89.1	76.83	76.67	75.27	73.6	51.53	42.75	36.63	36.68	39.56
LmjF.22.0010 | Leishmania major strain Friedlin | CLN3 protein, putative | protein |	100	100		99.53	97.66	96.88	93.3	91.43	91.28	89.1	76.83	76.67	75.27	73.6	51.53	42.75	36.63	36.68	39.56
LMJSD75_220005000 | Leishmania major strain SD 75.1 | CLN3 protein, putative | protein |	99.53	99.53	99.53		97.51	96.73	93.15	90.97	90.81	89.25	76.67	76.52	75.12	73.29	51.38	42.75	36.4	36.44	39.17
LGELEM452_060018500 | Leishmania gerbilli strain LEM452 | CLN3 protein, putative | protein |	97.66	97.66	97.66	97.51		98.44	94.86	91.9	91.74	90.03	76.98	76.83	75.43	74.07	51.69	43.05	36.28	36.44	39.3
LARLEM1108_220005000 | Leishmania arabica strain LEM1108 | CLN3 protein, putative | protein |	96.88	96.88	96.88	96.73	98.44		93.77	90.97	90.81	89.56	76.67	76.52	75.43	74.07	51.23	42.9	36.16	36.32	39.3
LTRL590_060018900 | Leishmania tropica L590 | CLN3 protein, putative | protein |	93.3	93.3	93.3	93.15	94.86	93.77		91.74	91.43	88.47	76.36	76.21	75.27	73.45	52.15	42.14	36.16	36.08	39.04
LinJ.06.1360 | Leishmania infantum JPCM5 | CLN3 protein, putative | protein |	91.43	91.43	91.43	90.97	91.9	90.97	91.74		98.75	90.03	76.36	76.21	74.96	74.38	51.84	42.44	35.92	36.32	39.04
LdBPK_061360.1 | Leishmania donovani BPK282A1 | CLN3 protein, putative | protein |	91.28	91.28	91.28	90.81	91.74	90.81	91.43	98.75		89.88	76.21	76.05	74.65	74.38	51.69	42.14	35.69	36.08	38.65
LmxM.22.0010 | Leishmania mexicana MHOM/GT/2001/U1103 | CLN3 protein, putative | protein |	89.1	89.1	89.1	89.25	90.03	89.56	88.47	90.03	89.88		77.29	77.14	75.27	73.6	52.45	42.75	35.22	35.35	38
LbrM.22.0010 | Leishmania braziliensis MHOM/BR/75/M2904 | CLN3 protein, putative | protein |	76.83	76.83	76.83	76.67	76.98	76.67	76.36	76.36	76.21	77.29		99.84	95.53	74.53	52.08	44.76	35.45	35.88	39.53
LBRM2903_220005200 | Leishmania braziliensis MHOM/BR/75/M2903 | CLN3 protein, putative | protein |	76.67	76.67	76.67	76.52	76.83	76.52	76.21	76.21	76.05	77.14	99.84		95.37	74.53	52.08	44.6	35.45	35.88	39.53
LPAL13_220005100 | Leishmania panamensis MHOM/COL/81/L13 | CLN3 protein, putative | protein |	75.27	75.27	75.27	75.12	75.43	75.43	75.27	74.96	74.65	75.27	95.53	95.37		73.91	51.16	43.66	34.63	35.15	38.74
LMARLEM2494_220005000 | Leishmania sp. MAR LEM2494 | CLN3 protein, putative | protein |	73.6	73.6	73.6	73.29	74.07	74.07	73.45	74.38	74.38	73.6	74.53	74.53	73.91		50.69	42.68	35.45	35.11	38
EMOLV88_220005000 | Endotrypanum monterogeii strain LV88 | CLN3 protein, putative | protein |	51.53	51.53	51.53	51.38	51.69	51.23	52.15	51.84	51.69	52.45	52.08	52.08	51.16	50.69		40.46	31.54	32.33	33.68
Baya_003_0600 | Blechomonas ayalai B08-376 | hypothetical protein, conserved | protein |	42.75	42.75	42.75	42.75	43.05	42.9	42.14	42.44	42.14	42.75	44.76	44.6	43.66	42.68	40.46		30.22	30.98	33.69
CFAC1_030012700 | Crithidia fasciculata strain Cf-Cl | CLN3 protein, putative | protein |	36.63	36.63	36.63	36.4	36.28	36.16	36.16	35.92	35.69	35.22	35.45	35.45	34.63	35.45	31.54	30.22		71.38	65.48
LpyrH10_24_0520 | Leptomonas pyrrhocoris H10 | hypothetical protein, conserved | protein |	36.68	36.68	36.68	36.44	36.44	36.32	36.08	36.32	36.08	35.35	35.88	35.88	35.15	35.11	32.33	30.98	71.38		67.52
Lsey_0580_0010 | Leptomonas seymouri ATCC 30220 | hypothetical protein conserved | protein |	39.56	39.56	39.56	39.17	39.3	39.3	39.04	39.04	38.65	38	39.53	39.53	38.74	38	33.68	33.69	65.48	67.52
