# Supplementary material for: CRISPR/Cas9 in Leishmania mexicana: A case study of LmxBTN1
Source: PLoS One. 2018 Feb 13;13(2):e0192723. doi: 10.1371/journal.pone.0192723 (PMC5811015; doi:10.1371/journal.pone.0192723)
Supplement: S3 Table — (XLSX) [file pone.0192723.s012.xlsx]

## Sheet: L_mex_wt_paired_trimmed map...
Name	Consensus length	Total read count	Single reads	Reads in pairs	Average coverage	Reference sequence	Reference length
LmxM.01.0010 | organism=Leishmania_mexicana_MHOM/GT/2001/U1103 | product=hypothetical protein, unknown function | location=LmxM.01:3968-4972(-) | length=1005 | sequence_SO=chromosome | mapping	1005	915	303	612	88.1841	LmxM.01.0010 | organism=Leishmania_mexicana_MHOM/GT/2001/U1103 | product=hypothetical protein, unknown function | location=LmxM.01:3968-4972(-) | length=1005 | sequence_SO=chromosome |	1005
LmxM.01.0020 | organism=Leishmania_mexicana_MHOM/GT/2001/U1103 | product=hypothetical protein, conserved | location=LmxM.01:6039-7664(-) | length=1626 | sequence_SO=chromosome | mapping	1626	1591	297	1294	95.8862	LmxM.01.0020 | organism=Leishmania_mexicana_MHOM/GT/2001/U1103 | product=hypothetical protein, conserved | location=LmxM.01:6039-7664(-) | length=1626 | sequence_SO=chromosome |	1626
LmxM.01.0030 | organism=Leishmania_mexicana_MHOM/GT/2001/U1103 | product=MCAK-like kinesin, putative | location=LmxM.01:9205-11223(-) | length=2019 | sequence_SO=chromosome | mapping	2019	1883	297	1586	91.8375	LmxM.01.0030 | organism=Leishmania_mexicana_MHOM/GT/2001/U1103 | product=MCAK-like kinesin, putative | location=LmxM.01:9205-11223(-) | length=2019 | sequence_SO=chromosome |	2019
LmxM.01.0040 | organism=Leishmania_mexicana_MHOM/GT/2001/U1103 | product=hypothetical protein, unknown function | location=LmxM.01:12179-12739(-) | length=561 | sequence_SO=chromosome | mapping	561	515	307	208	88.7558	LmxM.01.0040 | organism=Leishmania_mexicana_MHOM/GT/2001/U1103 | product=hypothetical protein, unknown function | location=LmxM.01:12179-12739(-) | length=561 | sequence_SO=chromosome |	561
LmxM.01.0050 | organism=Leishmania_mexicana_MHOM/GT/2001/U1103 | product=carboxylase, putative | location=LmxM.01:14846-16843(-) | length=1998 | sequence_SO=chromosome | mapping	1998	1925	291	1634	94.9079	LmxM.01.0050 | organism=Leishmania_mexicana_MHOM/GT/2001/U1103 | product=carboxylase, putative | location=LmxM.01:14846-16843(-) | length=1998 | sequence_SO=chromosome |	1998
LmxM.01.0060 | organism=Leishmania_mexicana_MHOM/GT/2001/U1103 | product=hypothetical protein, conserved | location=LmxM.01:18133-18888(-) | length=756 | sequence_SO=chromosome | mapping	756	760	308	452	97.1667	LmxM.01.0060 | organism=Leishmania_mexicana_MHOM/GT/2001/U1103 | product=hypothetical protein, conserved | location=LmxM.01:18133-18888(-) | length=756 | sequence_SO=chromosome |	756
LmxM.01.0070 | organism=Leishmania_mexicana_MHOM/GT/2001/U1103 | product=hypothetical protein, conserved | location=LmxM.01:19942-21741(-) | length=1800 | sequence_SO=chromosome | mapping	1800	1402	262	1140	76.2706	LmxM.01.0070 | organism=Leishmania_mexicana_MHOM/GT/2001/U1103 | product=hypothetical protein, conserved | location=LmxM.01:19942-21741(-) | length=1800 | sequence_SO=chromosome |	1800
LmxM.01.0080 | organism=Leishmania_mexicana_MHOM/GT/2001/U1103 | product=hypothetical protein, conserved | location=LmxM.01:22580-23293(-) | length=714 | sequence_SO=chromosome | mapping	714	708	298	410	96.1947	LmxM.01.0080 | organism=Leishmania_mexicana_MHOM/GT/2001/U1103 | product=hypothetical protein, conserved | location=LmxM.01:22580-23293(-) | length=714 | sequence_SO=chromosome |	714
LmxM.01.0090 | organism=Leishmania_mexicana_MHOM/GT/2001/U1103 | product=hypothetical protein, conserved | location=LmxM.01:24491-25315(-) | length=825 | sequence_SO=chromosome | mapping	825	743	263	480	87.377	LmxM.01.0090 | organism=Leishmania_mexicana_MHOM/GT/2001/U1103 | product=hypothetical protein, conserved | location=LmxM.01:24491-25315(-) | length=825 | sequence_SO=chromosome |	825
LmxM.01.0100 | organism=Leishmania_mexicana_MHOM/GT/2001/U1103 | product=hypothetical protein, conserved | location=LmxM.01:25652-26599(-) | length=948 | sequence_SO=chromosome | mapping	948	912	330	582	93.4504	LmxM.01.0100 | organism=Leishmania_mexicana_MHOM/GT/2001/U1103 | product=hypothetical protein, conserved | location=LmxM.01:25652-26599(-) | length=948 | sequence_SO=chromosome |	948
LmxM.01.0110 | organism=Leishmania_mexicana_MHOM/GT/2001/U1103 | product=glutaredoxin-like protein | location=LmxM.01:27727-28314(-) | length=588 | sequence_SO=chromosome | mapping	588	594	326	268	97.9082	LmxM.01.0110 | organism=Leishmania_mexicana_MHOM/GT/2001/U1103 | product=glutaredoxin-like protein | location=LmxM.01:27727-28314(-) | length=588 | sequence_SO=chromosome |	588
LmxM.01.0120 | organism=Leishmania_mexicana_MHOM/GT/2001/U1103 | product=hypothetical protein, conserved | location=LmxM.01:29460-30668(-) | length=1209 | sequence_SO=chromosome | mapping	1209	1098	306	792	88.5269	LmxM.01.0120 | organism=Leishmania_mexicana_MHOM/GT/2001/U1103 | product=hypothetical protein, conserved | location=LmxM.01:29460-30668(-) | length=1209 | sequence_SO=chromosome |	1209
LmxM.01.0130 | organism=Leishmania_mexicana_MHOM/GT/2001/U1103 | product=hypothetical protein, conserved | location=LmxM.01:32692-33786(-) | length=1095 | sequence_SO=chromosome | mapping	1095	1001	329	672	89.326	LmxM.01.0130 | organism=Leishmania_mexicana_MHOM/GT/2001/U1103 | product=hypothetical protein, conserved | location=LmxM.01:32692-33786(-) | length=1095 | sequence_SO=chromosome |	1095
LmxM.01.0140 | organism=Leishmania_mexicana_MHOM/GT/2001/U1103 | product=unspecified product | location=LmxM.01:35671-35919(-) | length=249 | sequence_SO=chromosome | mapping	249	164	160	4	60.4859	LmxM.01.0140 | organism=Leishmania_mexicana_MHOM/GT/2001/U1103 | product=unspecified product | location=LmxM.01:35671-35919(-) | length=249 | sequence_SO=chromosome |	249
LmxM.01.0150 | organism=Leishmania_mexicana_MHOM/GT/2001/U1103 | product=hypothetical protein, conserved | location=LmxM.01:36669-37019(-) | length=351 | sequence_SO=chromosome | mapping	351	321	277	44	88.5926	LmxM.01.0150 | organism=Leishmania_mexicana_MHOM/GT/2001/U1103 | product=hypothetical protein, conserved | location=LmxM.01:36669-37019(-) | length=351 | sequence_SO=chromosome |	351
LmxM.01.0160 | organism=Leishmania_mexicana_MHOM/GT/2001/U1103 | product=hypothetical protein, conserved | location=LmxM.01:37854-38096(-) | length=243 | sequence_SO=chromosome | mapping	243	202	198	4	76.9177	LmxM.01.0160 | organism=Leishmania_mexicana_MHOM/GT/2001/U1103 | product=hypothetical protein, conserved | location=LmxM.01:37854-38096(-) | length=243 | sequence_SO=chromosome |	243
LmxM.01.0170 | organism=Leishmania_mexicana_MHOM/GT/2001/U1103 | product=unspecified product | location=LmxM.01:39931-41277(-) | length=1347 | sequence_SO=chromosome | mapping	1347	1315	345	970	95.5174	LmxM.01.0170 | organism=Leishmania_mexicana_MHOM/GT/2001/U1103 | product=unspecified product | location=LmxM.01:39931-41277(-) | length=1347 | sequence_SO=chromosome |	1347
LmxM.01.0180 | organism=Leishmania_mexicana_MHOM/GT/2001/U1103 | product=CLC-type chloride channel, putative | location=LmxM.01:42656-44968(-) | length=2313 | sequence_SO=chromosome | mapping	2313	2312	348	1964	97.9529	LmxM.01.0180 | organism=Leishmania_mexicana_MHOM/GT/2001/U1103 | product=CLC-type chloride channel, putative | location=LmxM.01:42656-44968(-) | length=2313 | sequence_SO=chromosome |	2313
LmxM.01.0190 | organism=Leishmania_mexicana_MHOM/GT/2001/U1103 | product=hypothetical protein, conserved | location=LmxM.01:46142-46732(-) | length=591 | sequence_SO=chromosome | mapping	591	520	264	256	83.3164	LmxM.01.0190 | organism=Leishmania_mexicana_MHOM/GT/2001/U1103 | product=hypothetical protein, conserved | location=LmxM.01:46142-46732(-) | length=591 | sequence_SO=chromosome |	591
LmxM.01.0200 | organism=Leishmania_mexicana_MHOM/GT/2001/U1103 | product=hypothetical protein, conserved | location=LmxM.01:47634-48530(-) | length=897 | sequence_SO=chromosome | mapping	897	888	328	560	96.4415	LmxM.01.0200 | organism=Leishmania_mexicana_MHOM/GT/2001/U1103 | product=hypothetical protein, conserved | location=LmxM.01:47634-48530(-) | length=897 | sequence_SO=chromosome |	897
LmxM.01.0210 | organism=Leishmania_mexicana_MHOM/GT/2001/U1103 | product=hypothetical protein, conserved | location=LmxM.01:49342-52032(-) | length=2691 | sequence_SO=chromosome | mapping	2691	2605	301	2304	95.3679	LmxM.01.0210 | organism=Leishmania_mexicana_MHOM/GT/2001/U1103 | product=hypothetical protein, conserved | location=LmxM.01:49342-52032(-) | length=2691 | sequence_SO=chromosome |	2691
LmxM.01.0220 | organism=Leishmania_mexicana_MHOM/GT/2001/U1103 | product=cyclophilin type peptidyl-prolyl cis-trans isomerase, putative | location=LmxM.01:55167-56171(-) | length=1005 | sequence_SO=chromosome | mapping	1005	1064	360	704	102.561	LmxM.01.0220 | organism=Leishmania_mexicana_MHOM/GT/2001/U1103 | product=cyclophilin type peptidyl-prolyl cis-trans isomerase, putative | location=LmxM.01:55167-56171(-) | length=1005 | sequence_SO=chromosome |	1005
LmxM.01.0230 | organism=Leishmania_mexicana_MHOM/GT/2001/U1103 | product=hypothetical protein, conserved | location=LmxM.01:59426-59842(-) | length=417 | sequence_SO=chromosome | mapping	417	377	279	98	85.6283	LmxM.01.0230 | organism=Leishmania_mexicana_MHOM/GT/2001/U1103 | product=hypothetical protein, conserved | location=LmxM.01:59426-59842(-) | length=417 | sequence_SO=chromosome |	417
LmxM.01.0240 | organism=Leishmania_mexicana_MHOM/GT/2001/U1103 | product=DNA excision/repair protein SNF2, putative | location=LmxM.01:60622-63405(-) | length=2784 | sequence_SO=chromosome | mapping	2784	2833	251	2582	100.259	LmxM.01.0240 | organism=Leishmania_mexicana_MHOM/GT/2001/U1103 | product=DNA excision/repair protein SNF2, putative | location=LmxM.01:60622-63405(-) | length=2784 | sequence_SO=chromosome |	2784
LmxM.01.0250 | organism=Leishmania_mexicana_MHOM/GT/2001/U1103 | product=hypothetical protein, conserved | location=LmxM.01:64196-66595(-) | length=2400 | sequence_SO=chromosome | mapping	2400	2286	310	1976	93.6471	LmxM.01.0250 | organism=Leishmania_mexicana_MHOM/GT/2001/U1103 | product=hypothetical protein, conserved | location=LmxM.01:64196-66595(-) | length=2400 | sequence_SO=chromosome |	2400
LmxM.01.0260 | organism=Leishmania_mexicana_MHOM/GT/2001/U1103 | product=hypothetical protein, conserved | location=LmxM.01:67397-68236(-) | length=840 | sequence_SO=chromosome | mapping	840	751	307	444	86.825	LmxM.01.0260 | organism=Leishmania_mexicana_MHOM/GT/2001/U1103 | product=hypothetical protein, conserved | location=LmxM.01:67397-68236(-) | length=840 | sequence_SO=chromosome |	840
LmxM.01.0270 | organism=Leishmania_mexicana_MHOM/GT/2001/U1103 | product=thioredoxin, putative | location=LmxM.01:69317-69640(-) | length=324 | sequence_SO=chromosome | mapping	324	288	264	24	84.4506	LmxM.01.0270 | organism=Leishmania_mexicana_MHOM/GT/2001/U1103 | product=thioredoxin, putative | location=LmxM.01:69317-69640(-) | length=324 | sequence_SO=chromosome |	324
LmxM.01.0280 | organism=Leishmania_mexicana_MHOM/GT/2001/U1103 | product=pseudouridylate synthase-like protein | location=LmxM.01:71022-72266(-) | length=1245 | sequence_SO=chromosome | mapping	1245	1180	340	840	92.4988	LmxM.01.0280 | organism=Leishmania_mexicana_MHOM/GT/2001/U1103 | product=pseudouridylate synthase-like protein | location=LmxM.01:71022-72266(-) | length=1245 | sequence_SO=chromosome |	1245
LmxM.01.0290 | organism=Leishmania_mexicana_MHOM/GT/2001/U1103 | product=hypothetical protein, conserved | location=LmxM.01:73478-73996(-) | length=519 | sequence_SO=chromosome | mapping	519	590	338	252	109.048	LmxM.01.0290 | organism=Leishmania_mexicana_MHOM/GT/2001/U1103 | product=hypothetical protein, conserved | location=LmxM.01:73478-73996(-) | length=519 | sequence_SO=chromosome |	519
LmxM.01.0300 | organism=Leishmania_mexicana_MHOM/GT/2001/U1103 | product=hypothetical protein, conserved | location=LmxM.01:74920-75099(-) | length=180 | sequence_SO=chromosome | mapping	180	177	177	0	87.3722	LmxM.01.0300 | organism=Leishmania_mexicana_MHOM/GT/2001/U1103 | product=hypothetical protein, conserved | location=LmxM.01:74920-75099(-) | length=180 | sequence_SO=chromosome |	180
LmxM.01.0310 | organism=Leishmania_mexicana_MHOM/GT/2001/U1103 | product=acidocalcisomal exopolyphosphatase, putative | location=LmxM.01:75666-76829(-) | length=1164 | sequence_SO=chromosome | mapping	1164	1325	391	934	111.416	LmxM.01.0310 | organism=Leishmania_mexicana_MHOM/GT/2001/U1103 | product=acidocalcisomal exopolyphosphatase, putative | location=LmxM.01:75666-76829(-) | length=1164 | sequence_SO=chromosome |	1164
LmxM.01.0315 | organism=Leishmania_mexicana_MHOM/GT/2001/U1103 | product=hypothetical protein, conserved | location=LmxM.01:77187-77618(-) | length=432 | sequence_SO=chromosome | mapping	432	427	345	82	95.9167	LmxM.01.0315 | organism=Leishmania_mexicana_MHOM/GT/2001/U1103 | product=hypothetical protein, conserved | location=LmxM.01:77187-77618(-) | length=432 | sequence_SO=chromosome |	432
LmxM.01.0320 | organism=Leishmania_mexicana_MHOM/GT/2001/U1103 | product=poly(A) export protein, putative | location=LmxM.01:78587-79510(+) | length=924 | sequence_SO=chromosome | mapping	924	1066	408	658	112.759	LmxM.01.0320 | organism=Leishmania_mexicana_MHOM/GT/2001/U1103 | product=poly(A) export protein, putative | location=LmxM.01:78587-79510(+) | length=924 | sequence_SO=chromosome |	924
LmxM.01.0330 | organism=Leishmania_mexicana_MHOM/GT/2001/U1103 | product=hypothetical protein, conserved | location=LmxM.01:79980-80612(+) | length=633 | sequence_SO=chromosome | mapping	633	728	388	340	111.889	LmxM.01.0330 | organism=Leishmania_mexicana_MHOM/GT/2001/U1103 | product=hypothetical protein, conserved | location=LmxM.01:79980-80612(+) | length=633 | sequence_SO=chromosome |	633
LmxM.01.0335 | organism=Leishmania_mexicana_MHOM/GT/2001/U1103 | product=hypothetical protein, conserved | location=LmxM.01:81203-81496(+) | length=294 | sequence_SO=chromosome | mapping	294	303	285	18	96.0748	LmxM.01.0335 | organism=Leishmania_mexicana_MHOM/GT/2001/U1103 | product=hypothetical protein, conserved | location=LmxM.01:81203-81496(+) | length=294 | sequence_SO=chromosome |	294
LmxM.01.0340 | organism=Leishmania_mexicana_MHOM/GT/2001/U1103 | product=hypothetical protein, conserved | location=LmxM.01:82553-83329(+) | length=777 | sequence_SO=chromosome | mapping	777	736	326	410	92.7426	LmxM.01.0340 | organism=Leishmania_mexicana_MHOM/GT/2001/U1103 | product=hypothetical protein, conserved | location=LmxM.01:82553-83329(+) | length=777 | sequence_SO=chromosome |	777
LmxM.01.0350 | organism=Leishmania_mexicana_MHOM/GT/2001/U1103 | product=hypothetical protein, conserved | location=LmxM.01:85029-87278(+) | length=2250 | sequence_SO=chromosome | mapping	2253	2166	280	1886	94.3378	LmxM.01.0350 | organism=Leishmania_mexicana_MHOM/GT/2001/U1103 | product=hypothetical protein, conserved | location=LmxM.01:85029-87278(+) | length=2250 | sequence_SO=chromosome |	2250
LmxM.01.0360 | organism=Leishmania_mexicana_MHOM/GT/2001/U1103 | product=hypothetical protein, conserved | location=LmxM.01:88098-88673(+) | length=576 | sequence_SO=chromosome | mapping	576	570	342	228	95.967	LmxM.01.0360 | organism=Leishmania_mexicana_MHOM/GT/2001/U1103 | product=hypothetical protein, conserved | location=LmxM.01:88098-88673(+) | length=576 | sequence_SO=chromosome |	576
LmxM.01.0370 | organism=Leishmania_mexicana_MHOM/GT/2001/U1103 | product=hypothetical protein, conserved | location=LmxM.01:89350-89916(+) | length=567 | sequence_SO=chromosome | mapping	567	510	306	204	86.6702	LmxM.01.0370 | organism=Leishmania_mexicana_MHOM/GT/2001/U1103 | product=hypothetical protein, conserved | location=LmxM.01:89350-89916(+) | length=567 | sequence_SO=chromosome |	567
LmxM.01.0380 | organism=Leishmania_mexicana_MHOM/GT/2001/U1103 | product=hypothetical protein, conserved | location=LmxM.01:90556-93045(+) | length=2490 | sequence_SO=chromosome | mapping	2490	2452	304	2148	97.047	LmxM.01.0380 | organism=Leishmania_mexicana_MHOM/GT/2001/U1103 | product=hypothetical protein, conserved | location=LmxM.01:90556-93045(+) | length=2490 | sequence_SO=chromosome |	2490
LmxM.01.0390 | organism=Leishmania_mexicana_MHOM/GT/2001/U1103 | product=hypothetical protein, conserved | location=LmxM.01:93893-96361(+) | length=2469 | sequence_SO=chromosome | mapping	2469	2303	307	1996	91.358	LmxM.01.0390 | organism=Leishmania_mexicana_MHOM/GT/2001/U1103 | product=hypothetical protein, conserved | location=LmxM.01:93893-96361(+) | length=2469 | sequence_SO=chromosome |	2469
LmxM.01.0400 | organism=Leishmania_mexicana_MHOM/GT/2001/U1103 | product=hypothetical protein, conserved | location=LmxM.01:97128-98789(+) | length=1662 | sequence_SO=chromosome | mapping	1662	1656	294	1362	97.7978	LmxM.01.0400 | organism=Leishmania_mexicana_MHOM/GT/2001/U1103 | product=hypothetical protein, conserved | location=LmxM.01:97128-98789(+) | length=1662 | sequence_SO=chromosome |	1662
LmxM.01.0410 | organism=Leishmania_mexicana_MHOM/GT/2001/U1103 | product=unspecified product | location=LmxM.01:99489-100091(+) | length=603 | sequence_SO=chromosome | mapping	603	1039	541	498	165.425	LmxM.01.0410 | organism=Leishmania_mexicana_MHOM/GT/2001/U1103 | product=unspecified product | location=LmxM.01:99489-100091(+) | length=603 | sequence_SO=chromosome |	603
LmxM.01.0430 | organism=Leishmania_mexicana_MHOM/GT/2001/U1103 | product=hypothetical protein, conserved | location=LmxM.01:101001-103256(+) | length=2256 | sequence_SO=chromosome | mapping	2256	2151	319	1832	93.7185	LmxM.01.0430 | organism=Leishmania_mexicana_MHOM/GT/2001/U1103 | product=hypothetical protein, conserved | location=LmxM.01:101001-103256(+) | length=2256 | sequence_SO=chromosome |	2256
LmxM.01.0440 | organism=Leishmania_mexicana_MHOM/GT/2001/U1103 | product=hypothetical protein, unknown function | location=LmxM.01:104518-106266(+) | length=1749 | sequence_SO=chromosome | mapping	1749	1579	245	1334	88.8816	LmxM.01.0440 | organism=Leishmania_mexicana_MHOM/GT/2001/U1103 | product=hypothetical protein, unknown function | location=LmxM.01:104518-106266(+) | length=1749 | sequence_SO=chromosome |	1749
LmxM.01.0450 | organism=Leishmania_mexicana_MHOM/GT/2001/U1103 | product=alpha/beta-hydrolase-like protein | location=LmxM.01:108977-109618(+) | length=642 | sequence_SO=chromosome | mapping	642	467	197	270	70.0623	LmxM.01.0450 | organism=Leishmania_mexicana_MHOM/GT/2001/U1103 | product=alpha/beta-hydrolase-like protein | location=LmxM.01:108977-109618(+) | length=642 | sequence_SO=chromosome |	642
LmxM.01.0460 | organism=Leishmania_mexicana_MHOM/GT/2001/U1103 | product=conserved protein | location=LmxM.01:113402-117733(+) | length=4332 | sequence_SO=chromosome | mapping	4332	3986	324	3662	89.3167	LmxM.01.0460 | organism=Leishmania_mexicana_MHOM/GT/2001/U1103 | product=conserved protein | location=LmxM.01:113402-117733(+) | length=4332 | sequence_SO=chromosome |	4332
LmxM.01.0470 | organism=Leishmania_mexicana_MHOM/GT/2001/U1103 | product=fatty acyl CoA syntetase 1, putative | location=LmxM.01:120611-122701(+) | length=2091 | sequence_SO=chromosome | mapping	2091	2110	304	1806	99.2382	LmxM.01.0470 | organism=Leishmania_mexicana_MHOM/GT/2001/U1103 | product=fatty acyl CoA syntetase 1, putative | location=LmxM.01:120611-122701(+) | length=2091 | sequence_SO=chromosome |	2091
LmxM.01.0480 | organism=Leishmania_mexicana_MHOM/GT/2001/U1103 | product=beta eliminating lyase,putative | location=LmxM.01:124164-125273(+) | length=1110 | sequence_SO=chromosome | mapping	1110	969	233	736	85.5378	LmxM.01.0480 | organism=Leishmania_mexicana_MHOM/GT/2001/U1103 | product=beta eliminating lyase,putative | location=LmxM.01:124164-125273(+) | length=1110 | sequence_SO=chromosome |	1110
LmxM.01.0490 | organism=Leishmania_mexicana_MHOM/GT/2001/U1103 | product=long-chain-fatty-acid-CoA ligase, putative | location=LmxM.01:127701-129797(+) | length=2097 | sequence_SO=chromosome | mapping	2097	2095	269	1826	98.4807	LmxM.01.0490 | organism=Leishmania_mexicana_MHOM/GT/2001/U1103 | product=long-chain-fatty-acid-CoA ligase, putative | location=LmxM.01:127701-129797(+) | length=2097 | sequence_SO=chromosome |	2097
LmxM.01.0500 | organism=Leishmania_mexicana_MHOM/GT/2001/U1103 | product=fatty acyl CoA synthetase 2, putative | location=LmxM.01:130906-133029(+) | length=2124 | sequence_SO=chromosome | mapping	2124	2102	280	1822	97.3526	LmxM.01.0500 | organism=Leishmania_mexicana_MHOM/GT/2001/U1103 | product=fatty acyl CoA synthetase 2, putative | location=LmxM.01:130906-133029(+) | length=2124 | sequence_SO=chromosome |	2124
LmxM.01.0510 | organism=Leishmania_mexicana_MHOM/GT/2001/U1103 | product=unspecified product | location=LmxM.01:135799-136002(+) | length=204 | sequence_SO=chromosome | mapping	204	158	156	2	70.6078	LmxM.01.0510 | organism=Leishmania_mexicana_MHOM/GT/2001/U1103 | product=unspecified product | location=LmxM.01:135799-136002(+) | length=204 | sequence_SO=chromosome |	204
LmxM.01.0520 | organism=Leishmania_mexicana_MHOM/GT/2001/U1103 | product=long-chain-fatty-acid-CoA ligase, putative | location=LmxM.01:136729-138876(+) | length=2148 | sequence_SO=chromosome | mapping	2148	2068	234	1834	94.4204	LmxM.01.0520 | organism=Leishmania_mexicana_MHOM/GT/2001/U1103 | product=long-chain-fatty-acid-CoA ligase, putative | location=LmxM.01:136729-138876(+) | length=2148 | sequence_SO=chromosome |	2148
LmxM.01.0530 | organism=Leishmania_mexicana_MHOM/GT/2001/U1103 | product=long-chain-fatty-acid-CoA ligase, putative | location=LmxM.01:142094-146941(+) | length=4848 | sequence_SO=chromosome | mapping	4848	4779	283	4496	96.8439	LmxM.01.0530 | organism=Leishmania_mexicana_MHOM/GT/2001/U1103 | product=long-chain-fatty-acid-CoA ligase, putative | location=LmxM.01:142094-146941(+) | length=4848 | sequence_SO=chromosome |	4848
LmxM.01.0540 | organism=Leishmania_mexicana_MHOM/GT/2001/U1103 | product=hypothetical protein, conserved | location=LmxM.01:147957-150062(+) | length=2106 | sequence_SO=chromosome | mapping	2106	2087	319	1768	96.8224	LmxM.01.0540 | organism=Leishmania_mexicana_MHOM/GT/2001/U1103 | product=hypothetical protein, conserved | location=LmxM.01:147957-150062(+) | length=2106 | sequence_SO=chromosome |	2106
LmxM.01.0550 | organism=Leishmania_mexicana_MHOM/GT/2001/U1103 | product=hypothetical protein, conserved | location=LmxM.01:152683-153819(+) | length=1137 | sequence_SO=chromosome | mapping	1137	955	273	682	81.7344	LmxM.01.0550 | organism=Leishmania_mexicana_MHOM/GT/2001/U1103 | product=hypothetical protein, conserved | location=LmxM.01:152683-153819(+) | length=1137 | sequence_SO=chromosome |	1137
LmxM.01.0560 | organism=Leishmania_mexicana_MHOM/GT/2001/U1103 | product=hypothetical protein, conserved | location=LmxM.01:154702-156567(+) | length=1866 | sequence_SO=chromosome | mapping	1866	1686	206	1480	88.7605	LmxM.01.0560 | organism=Leishmania_mexicana_MHOM/GT/2001/U1103 | product=hypothetical protein, conserved | location=LmxM.01:154702-156567(+) | length=1866 | sequence_SO=chromosome |	1866
LmxM.01.0570 | organism=Leishmania_mexicana_MHOM/GT/2001/U1103 | product=tricarboxylate carrier, putative | location=LmxM.01:157108-158088(+) | length=981 | sequence_SO=chromosome | mapping	981	919	317	602	91.5719	LmxM.01.0570 | organism=Leishmania_mexicana_MHOM/GT/2001/U1103 | product=tricarboxylate carrier, putative | location=LmxM.01:157108-158088(+) | length=981 | sequence_SO=chromosome |	981
LmxM.01.0580 | organism=Leishmania_mexicana_MHOM/GT/2001/U1103 | product=hypothetical protein, conserved | location=LmxM.01:158854-161742(+) | length=2889 | sequence_SO=chromosome | mapping	2889	2697	209	2488	91.4936	LmxM.01.0580 | organism=Leishmania_mexicana_MHOM/GT/2001/U1103 | product=hypothetical protein, conserved | location=LmxM.01:158854-161742(+) | length=2889 | sequence_SO=chromosome |	2889
LmxM.01.0590 | organism=Leishmania_mexicana_MHOM/GT/2001/U1103 | product=mitochondrial RNA editing ligase 1 | location=LmxM.01:162620-163696(+) | length=1077 | sequence_SO=chromosome | mapping	1077	1027	337	690	93.2572	LmxM.01.0590 | organism=Leishmania_mexicana_MHOM/GT/2001/U1103 | product=mitochondrial RNA editing ligase 1 | location=LmxM.01:162620-163696(+) | length=1077 | sequence_SO=chromosome |	1077
LmxM.01.0600 | organism=Leishmania_mexicana_MHOM/GT/2001/U1103 | product=hypothetical protein, conserved | location=LmxM.01:164919-170330(+) | length=5412 | sequence_SO=chromosome | mapping	5412	5321	347	4974	96.7916	LmxM.01.0600 | organism=Leishmania_mexicana_MHOM/GT/2001/U1103 | product=hypothetical protein, conserved | location=LmxM.01:164919-170330(+) | length=5412 | sequence_SO=chromosome |	5412
LmxM.01.0610 | organism=Leishmania_mexicana_MHOM/GT/2001/U1103 | product=DNA-damage inducible protein DDI1-like protein | location=LmxM.01:171360-172091(+) | length=732 | sequence_SO=chromosome | mapping	732	696	310	386	92.1667	LmxM.01.0610 | organism=Leishmania_mexicana_MHOM/GT/2001/U1103 | product=DNA-damage inducible protein DDI1-like protein | location=LmxM.01:171360-172091(+) | length=732 | sequence_SO=chromosome |	732
LmxM.01.0620 | organism=Leishmania_mexicana_MHOM/GT/2001/U1103 | product=hypothetical protein, conserved | location=LmxM.01:172751-174451(+) | length=1701 | sequence_SO=chromosome | mapping	1701	1521	283	1238	87.4309	LmxM.01.0620 | organism=Leishmania_mexicana_MHOM/GT/2001/U1103 | product=hypothetical protein, conserved | location=LmxM.01:172751-174451(+) | length=1701 | sequence_SO=chromosome |	1701
LmxM.01.0630 | organism=Leishmania_mexicana_MHOM/GT/2001/U1103 | product=unspecified product | location=LmxM.01:176970-178892(+) | length=1923 | sequence_SO=chromosome | mapping	1923	1924	322	1602	97.8934	LmxM.01.0630 | organism=Leishmania_mexicana_MHOM/GT/2001/U1103 | product=unspecified product | location=LmxM.01:176970-178892(+) | length=1923 | sequence_SO=chromosome |	1923
LmxM.01.0640 | organism=Leishmania_mexicana_MHOM/GT/2001/U1103 | product=HSP70-like protein | location=LmxM.01:180352-183702(+) | length=3351 | sequence_SO=chromosome | mapping	3351	3212	300	2912	94.0949	LmxM.01.0640 | organism=Leishmania_mexicana_MHOM/GT/2001/U1103 | product=HSP70-like protein | location=LmxM.01:180352-183702(+) | length=3351 | sequence_SO=chromosome |	3351
LmxM.01.0650 | organism=Leishmania_mexicana_MHOM/GT/2001/U1103 | product=mitochondrial processing peptide beta subunit, putative,metallo-peptidase, Clan ME, Family M16 | location=LmxM.01:184245-185729(+) | length=1485 | sequence_SO=chromosome | mapping	1485	1384	366	1018	91.0121	LmxM.01.0650 | organism=Leishmania_mexicana_MHOM/GT/2001/U1103 | product=mitochondrial processing peptide beta subunit, putative,metallo-peptidase, Clan ME, Family M16 | location=LmxM.01:184245-185729(+) | length=1485 | sequence_SO=chromosome |	1485
LmxM.01.0660 | organism=Leishmania_mexicana_MHOM/GT/2001/U1103 | product=hypothetical protein, conserved | location=LmxM.01:187062-191429(+) | length=4368 | sequence_SO=chromosome | mapping	4368	4446	370	4076	100.182	LmxM.01.0660 | organism=Leishmania_mexicana_MHOM/GT/2001/U1103 | product=hypothetical protein, conserved | location=LmxM.01:187062-191429(+) | length=4368 | sequence_SO=chromosome |	4368
LmxM.01.0670 | organism=Leishmania_mexicana_MHOM/GT/2001/U1103 | product=hypothetical protein, conserved | location=LmxM.01:192474-193340(+) | length=867 | sequence_SO=chromosome | mapping	867	816	334	482	91.9804	LmxM.01.0670 | organism=Leishmania_mexicana_MHOM/GT/2001/U1103 | product=hypothetical protein, conserved | location=LmxM.01:192474-193340(+) | length=867 | sequence_SO=chromosome |	867
LmxM.01.0680 | organism=Leishmania_mexicana_MHOM/GT/2001/U1103 | product=hypothetical protein, unknown function | location=LmxM.01:196856-199270(+) | length=2415 | sequence_SO=chromosome | mapping	2415	2416	308	2108	98.2464	LmxM.01.0680 | organism=Leishmania_mexicana_MHOM/GT/2001/U1103 | product=hypothetical protein, unknown function | location=LmxM.01:196856-199270(+) | length=2415 | sequence_SO=chromosome |	2415
LmxM.01.0690 | organism=Leishmania_mexicana_MHOM/GT/2001/U1103 | product=hypothetical protein, unknown function | location=LmxM.01:200878-201567(+) | length=690 | sequence_SO=chromosome | mapping	690	633	249	384	89.1855	LmxM.01.0690 | organism=Leishmania_mexicana_MHOM/GT/2001/U1103 | product=hypothetical protein, unknown function | location=LmxM.01:200878-201567(+) | length=690 | sequence_SO=chromosome |	690
LmxM.01.0700 | organism=Leishmania_mexicana_MHOM/GT/2001/U1103 | product=unspecified product | location=LmxM.01:203928-204668(+) | length=741 | sequence_SO=chromosome | mapping	741	508	278	230	65.2578	LmxM.01.0700 | organism=Leishmania_mexicana_MHOM/GT/2001/U1103 | product=unspecified product | location=LmxM.01:203928-204668(+) | length=741 | sequence_SO=chromosome |	741
LmxM.01.0710 | organism=Leishmania_mexicana_MHOM/GT/2001/U1103 | product=ubiquitin activating enzyme, putative | location=LmxM.01:206910-208487(+) | length=1578 | sequence_SO=chromosome | mapping	1578	1522	320	1202	94.7414	LmxM.01.0710 | organism=Leishmania_mexicana_MHOM/GT/2001/U1103 | product=ubiquitin activating enzyme, putative | location=LmxM.01:206910-208487(+) | length=1578 | sequence_SO=chromosome |	1578
LmxM.01.0720 | organism=Leishmania_mexicana_MHOM/GT/2001/U1103 | product=hypothetical protein, conserved | location=LmxM.01:209117-213763(+) | length=4647 | sequence_SO=chromosome | mapping	4647	4636	340	4296	98.1754	LmxM.01.0720 | organism=Leishmania_mexicana_MHOM/GT/2001/U1103 | product=hypothetical protein, conserved | location=LmxM.01:209117-213763(+) | length=4647 | sequence_SO=chromosome |	4647
LmxM.01.0730 | organism=Leishmania_mexicana_MHOM/GT/2001/U1103 | product=Meckel syndrome type 6 protein, putative,Coiled-coil and C2 domain-containing protein 2A, putative (mks6) | location=LmxM.01:214848-221540(+) | length=6693 | sequence_SO=chromosome | mapping	6693	6861	331	6530	101.014	LmxM.01.0730 | organism=Leishmania_mexicana_MHOM/GT/2001/U1103 | product=Meckel syndrome type 6 protein, putative,Coiled-coil and C2 domain-containing protein 2A, putative (mks6) | location=LmxM.01:214848-221540(+) | length=6693 | sequence_SO=chromosome |	6693
LmxM.01.0740 | organism=Leishmania_mexicana_MHOM/GT/2001/U1103 | product=hypothetical protein, conserved | location=LmxM.01:222176-224407(+) | length=2232 | sequence_SO=chromosome | mapping	2232	2286	322	1964	100.547	LmxM.01.0740 | organism=Leishmania_mexicana_MHOM/GT/2001/U1103 | product=hypothetical protein, conserved | location=LmxM.01:222176-224407(+) | length=2232 | sequence_SO=chromosome |	2232
LmxM.01.0750 | organism=Leishmania_mexicana_MHOM/GT/2001/U1103 | product=unspecified product | location=LmxM.01:225679-229866(+) | length=4188 | sequence_SO=chromosome | mapping	4188	4197	307	3890	98.7428	LmxM.01.0750 | organism=Leishmania_mexicana_MHOM/GT/2001/U1103 | product=unspecified product | location=LmxM.01:225679-229866(+) | length=4188 | sequence_SO=chromosome |	4188
LmxM.01.0760 | organism=Leishmania_mexicana_MHOM/GT/2001/U1103 | product=hypothetical protein, conserved | location=LmxM.01:230492-231466(+) | length=975 | sequence_SO=chromosome | mapping	975	950	268	682	94.9979	LmxM.01.0760 | organism=Leishmania_mexicana_MHOM/GT/2001/U1103 | product=hypothetical protein, conserved | location=LmxM.01:230492-231466(+) | length=975 | sequence_SO=chromosome |	975
LmxM.01.0770 | organism=Leishmania_mexicana_MHOM/GT/2001/U1103 | product=unspecified product | location=LmxM.01:232972-234342(+) | length=1371 | sequence_SO=chromosome | mapping	1371	2487	399	2088	178.112	LmxM.01.0770 | organism=Leishmania_mexicana_MHOM/GT/2001/U1103 | product=unspecified product | location=LmxM.01:232972-234342(+) | length=1371 | sequence_SO=chromosome |	1371
LmxM.01.0790 | organism=Leishmania_mexicana_MHOM/GT/2001/U1103 | product=unspecified product | location=LmxM.01:237560-239101(+) | length=1542 | sequence_SO=chromosome | mapping	1545	1701	315	1386	107.975	LmxM.01.0790 | organism=Leishmania_mexicana_MHOM/GT/2001/U1103 | product=unspecified product | location=LmxM.01:237560-239101(+) | length=1542 | sequence_SO=chromosome |	1542
LmxM.01.0800 | organism=Leishmania_mexicana_MHOM/GT/2001/U1103 | product=unspecified product | location=LmxM.01:240785-242200(+) | length=1416 | sequence_SO=chromosome | mapping	1416	1438	354	1084	99.2154	LmxM.01.0800 | organism=Leishmania_mexicana_MHOM/GT/2001/U1103 | product=unspecified product | location=LmxM.01:240785-242200(+) | length=1416 | sequence_SO=chromosome |	1416
LmxM.01.0810 | organism=Leishmania_mexicana_MHOM/GT/2001/U1103 | product=calcium/potassium channel (CAKC), putative | location=LmxM.01:243287-246388(+) | length=3102 | sequence_SO=chromosome | mapping	3102	3412	388	3024	108.415	LmxM.01.0810 | organism=Leishmania_mexicana_MHOM/GT/2001/U1103 | product=calcium/potassium channel (CAKC), putative | location=LmxM.01:243287-246388(+) | length=3102 | sequence_SO=chromosome |	3102
LmxM.01.0820 | organism=Leishmania_mexicana_MHOM/GT/2001/U1103 | product=unspecified product | location=LmxM.01:247967-251329(+) | length=3363 | sequence_SO=chromosome | mapping	3363	3660	330	3330	106.927	LmxM.01.0820 | organism=Leishmania_mexicana_MHOM/GT/2001/U1103 | product=unspecified product | location=LmxM.01:247967-251329(+) | length=3363 | sequence_SO=chromosome |	3363
LmxM.01.0830 | organism=Leishmania_mexicana_MHOM/GT/2001/U1103 | product=unspecified product | location=LmxM.01:253651-254418(+) | length=768 | sequence_SO=chromosome | mapping	768	662	290	372	83.3268	LmxM.01.0830 | organism=Leishmania_mexicana_MHOM/GT/2001/U1103 | product=unspecified product | location=LmxM.01:253651-254418(+) | length=768 | sequence_SO=chromosome |	768
LmxM.02.0030 | organism=Leishmania_mexicana_MHOM/GT/2001/U1103 | product=unspecified product | location=LmxM.02:4-792(-) | length=789 | sequence_SO=chromosome | mapping	786	718	318	400	89.1559	LmxM.02.0030 | organism=Leishmania_mexicana_MHOM/GT/2001/U1103 | product=unspecified product | location=LmxM.02:4-792(-) | length=789 | sequence_SO=chromosome |	789
LmxM.02.0040 | organism=Leishmania_mexicana_MHOM/GT/2001/U1103 | product=aminopeptidase P1, putative,metallo-peptidase, Clan MG, Family M24 | location=LmxM.02:1523-3376(-) | length=1854 | sequence_SO=chromosome | mapping	1854	2183	481	1702	115.365	LmxM.02.0040 | organism=Leishmania_mexicana_MHOM/GT/2001/U1103 | product=aminopeptidase P1, putative,metallo-peptidase, Clan MG, Family M24 | location=LmxM.02:1523-3376(-) | length=1854 | sequence_SO=chromosome |	1854
LmxM.02.0050 | organism=Leishmania_mexicana_MHOM/GT/2001/U1103 | product=cytochrome b-domain protein, putative | location=LmxM.02:7143-7784(-) | length=642 | sequence_SO=chromosome | mapping	642	561	289	272	85.3707	LmxM.02.0050 | organism=Leishmania_mexicana_MHOM/GT/2001/U1103 | product=cytochrome b-domain protein, putative | location=LmxM.02:7143-7784(-) | length=642 | sequence_SO=chromosome |	642
LmxM.02.0060 | organism=Leishmania_mexicana_MHOM/GT/2001/U1103 | product=hypothetical protein, conserved | location=LmxM.02:8386-9030(-) | length=645 | sequence_SO=chromosome | mapping	645	606	328	278	90.5628	LmxM.02.0060 | organism=Leishmania_mexicana_MHOM/GT/2001/U1103 | product=hypothetical protein, conserved | location=LmxM.02:8386-9030(-) | length=645 | sequence_SO=chromosome |	645
LmxM.02.0070 | organism=Leishmania_mexicana_MHOM/GT/2001/U1103 | product=hypothetical protein, conserved | location=LmxM.02:9591-10784(-) | length=1194 | sequence_SO=chromosome | mapping	1194	1193	305	888	97.8509	LmxM.02.0070 | organism=Leishmania_mexicana_MHOM/GT/2001/U1103 | product=hypothetical protein, conserved | location=LmxM.02:9591-10784(-) | length=1194 | sequence_SO=chromosome |	1194
LmxM.02.0080 | organism=Leishmania_mexicana_MHOM/GT/2001/U1103 | product=hypothetical protein, conserved | location=LmxM.02:13047-16040(-) | length=2994 | sequence_SO=chromosome | mapping	2994	2901	323	2578	95.6119	LmxM.02.0080 | organism=Leishmania_mexicana_MHOM/GT/2001/U1103 | product=hypothetical protein, conserved | location=LmxM.02:13047-16040(-) | length=2994 | sequence_SO=chromosome |	2994
LmxM.02.0085 | organism=Leishmania_mexicana_MHOM/GT/2001/U1103 | product=hypothetical protein, conserved | location=LmxM.02:17683-18675(-) | length=993 | sequence_SO=chromosome | mapping	993	884	226	658	87.1974	LmxM.02.0085 | organism=Leishmania_mexicana_MHOM/GT/2001/U1103 | product=hypothetical protein, conserved | location=LmxM.02:17683-18675(-) | length=993 | sequence_SO=chromosome |	993
LmxM.02.0090 | organism=Leishmania_mexicana_MHOM/GT/2001/U1103 | product=hypothetical protein, conserved | location=LmxM.02:19609-20673(-) | length=1065 | sequence_SO=chromosome | mapping	1065	1125	345	780	103.117	LmxM.02.0090 | organism=Leishmania_mexicana_MHOM/GT/2001/U1103 | product=hypothetical protein, conserved | location=LmxM.02:19609-20673(-) | length=1065 | sequence_SO=chromosome |	1065
LmxM.02.0100 | organism=Leishmania_mexicana_MHOM/GT/2001/U1103 | product=unspecified product | location=LmxM.02:22004-22900(-) | length=897 | sequence_SO=chromosome | mapping	896	829	371	458	87.5641	LmxM.02.0100 | organism=Leishmania_mexicana_MHOM/GT/2001/U1103 | product=unspecified product | location=LmxM.02:22004-22900(-) | length=897 | sequence_SO=chromosome |	897
LmxM.02.0110 | organism=Leishmania_mexicana_MHOM/GT/2001/U1103 | product=exportin T (tRNA exportin)-like protein | location=LmxM.02:24972-28475(-) | length=3504 | sequence_SO=chromosome | mapping	3504	3862	398	3464	108.293	LmxM.02.0110 | organism=Leishmania_mexicana_MHOM/GT/2001/U1103 | product=exportin T (tRNA exportin)-like protein | location=LmxM.02:24972-28475(-) | length=3504 | sequence_SO=chromosome |	3504
LmxM.02.0120 | organism=Leishmania_mexicana_MHOM/GT/2001/U1103 | product=phosphatidylinositol 3-kinase-like protein | location=LmxM.02:30259-45027(-) | length=14769 | sequence_SO=chromosome | mapping	14766	15741	407	15334	105.186	LmxM.02.0120 | organism=Leishmania_mexicana_MHOM/GT/2001/U1103 | product=phosphatidylinositol 3-kinase-like protein | location=LmxM.02:30259-45027(-) | length=14769 | sequence_SO=chromosome |	14769
LmxM.02.0130 | organism=Leishmania_mexicana_MHOM/GT/2001/U1103 | product=hypothetical protein, conserved | location=LmxM.02:46396-47097(-) | length=702 | sequence_SO=chromosome | mapping	702	624	252	372	85.8291	LmxM.02.0130 | organism=Leishmania_mexicana_MHOM/GT/2001/U1103 | product=hypothetical protein, conserved | location=LmxM.02:46396-47097(-) | length=702 | sequence_SO=chromosome |	702
LmxM.02.0140 | organism=Leishmania_mexicana_MHOM/GT/2001/U1103 | product=hypothetical protein, conserved | location=LmxM.02:48091-50772(-) | length=2682 | sequence_SO=chromosome | mapping	2682	2858	334	2524	104.931	LmxM.02.0140 | organism=Leishmania_mexicana_MHOM/GT/2001/U1103 | product=hypothetical protein, conserved | location=LmxM.02:48091-50772(-) | length=2682 | sequence_SO=chromosome |	2682
LmxM.02.0150 | organism=Leishmania_mexicana_MHOM/GT/2001/U1103 | product=hypothetical protein, conserved | location=LmxM.02:52079-57871(-) | length=5793 | sequence_SO=chromosome | mapping	5793	5954	336	5618	101.281	LmxM.02.0150 | organism=Leishmania_mexicana_MHOM/GT/2001/U1103 | product=hypothetical protein, conserved | location=LmxM.02:52079-57871(-) | length=5793 | sequence_SO=chromosome |	5793
LmxM.02.0160 | organism=Leishmania_mexicana_MHOM/GT/2001/U1103 | product=unspecified product | location=LmxM.02:64769-67225(-) | length=2457 | sequence_SO=chromosome | mapping	2457	1827	359	1468	72.5779	LmxM.02.0160 | organism=Leishmania_mexicana_MHOM/GT/2001/U1103 | product=unspecified product | location=LmxM.02:64769-67225(-) | length=2457 | sequence_SO=chromosome |	2457
LmxM.02.0170 | organism=Leishmania_mexicana_MHOM/GT/2001/U1103 | product=unspecified product | location=LmxM.02:71401-73797(-) | length=2397 | sequence_SO=chromosome | mapping	2397	2904	664	2240	118.346	LmxM.02.0170 | organism=Leishmania_mexicana_MHOM/GT/2001/U1103 | product=unspecified product | location=LmxM.02:71401-73797(-) | length=2397 | sequence_SO=chromosome |	2397
LmxM.02.0200 | organism=Leishmania_mexicana_MHOM/GT/2001/U1103 | product=phosphoglycan beta 1,3 galactosyltransferase-like protein | location=LmxM.02:78374-80695(-) | length=2322 | sequence_SO=chromosome | mapping	2321	1966	374	1592	83.4617	LmxM.02.0200 | organism=Leishmania_mexicana_MHOM/GT/2001/U1103 | product=phosphoglycan beta 1,3 galactosyltransferase-like protein | location=LmxM.02:78374-80695(-) | length=2322 | sequence_SO=chromosome |	2322
LmxM.02.0200partial | organism=Leishmania_mexicana_MHOM/GT/2001/U1103 | product=unspecified product | location=LmxM.00:290698-291558(+) | length=861 | sequence_SO=random_sequence | mapping	860	520	158	362	59.8571	LmxM.02.0200partial | organism=Leishmania_mexicana_MHOM/GT/2001/U1103 | product=unspecified product | location=LmxM.00:290698-291558(+) | length=861 | sequence_SO=random_sequence |	861
LmxM.02.0230 | organism=Leishmania_mexicana_MHOM/GT/2001/U1103 | product=unspecified product | location=LmxM.02:85960-88929(-) | length=2970 | sequence_SO=chromosome | mapping	2970	2840	330	2510	94.265	LmxM.02.0230 | organism=Leishmania_mexicana_MHOM/GT/2001/U1103 | product=unspecified product | location=LmxM.02:85960-88929(-) | length=2970 | sequence_SO=chromosome |	2970
LmxM.02.0240 | organism=Leishmania_mexicana_MHOM/GT/2001/U1103 | product=hypothetical protein, conserved | location=LmxM.02:91061-93748(-) | length=2688 | sequence_SO=chromosome | mapping	2688	2537	295	2242	93.0063	LmxM.02.0240 | organism=Leishmania_mexicana_MHOM/GT/2001/U1103 | product=hypothetical protein, conserved | location=LmxM.02:91061-93748(-) | length=2688 | sequence_SO=chromosome |	2688
LmxM.02.0250 | organism=Leishmania_mexicana_MHOM/GT/2001/U1103 | product=hypothetical protein, conserved | location=LmxM.02:95569-98874(-) | length=3306 | sequence_SO=chromosome | mapping	3306	3401	359	3042	101.324	LmxM.02.0250 | organism=Leishmania_mexicana_MHOM/GT/2001/U1103 | product=hypothetical protein, conserved | location=LmxM.02:95569-98874(-) | length=3306 | sequence_SO=chromosome |	3306
LmxM.02.0260 | organism=Leishmania_mexicana_MHOM/GT/2001/U1103 | product=small GTP binding protein rab6-like protein | location=LmxM.02:100199-101023(-) | length=825 | sequence_SO=chromosome | mapping	825	848	314	534	99.8376	LmxM.02.0260 | organism=Leishmania_mexicana_MHOM/GT/2001/U1103 | product=small GTP binding protein rab6-like protein | location=LmxM.02:100199-101023(-) | length=825 | sequence_SO=chromosome |	825
LmxM.02.0270 | organism=Leishmania_mexicana_MHOM/GT/2001/U1103 | product=hypothetical protein, conserved | location=LmxM.02:101810-102004(-) | length=195 | sequence_SO=chromosome | mapping	195	198	194	4	92.6154	LmxM.02.0270 | organism=Leishmania_mexicana_MHOM/GT/2001/U1103 | product=hypothetical protein, conserved | location=LmxM.02:101810-102004(-) | length=195 | sequence_SO=chromosome |	195
LmxM.02.0280 | organism=Leishmania_mexicana_MHOM/GT/2001/U1103 | product=hypothetical protein, conserved | location=LmxM.02:103896-104363(-) | length=468 | sequence_SO=chromosome | mapping	468	367	223	144	75.1261	LmxM.02.0280 | organism=Leishmania_mexicana_MHOM/GT/2001/U1103 | product=hypothetical protein, conserved | location=LmxM.02:103896-104363(-) | length=468 | sequence_SO=chromosome |	468
LmxM.02.0290 | organism=Leishmania_mexicana_MHOM/GT/2001/U1103 | product=protein kinase, putative | location=LmxM.02:105378-106997(-) | length=1620 | sequence_SO=chromosome | mapping	1620	1654	324	1330	100.37	LmxM.02.0290 | organism=Leishmania_mexicana_MHOM/GT/2001/U1103 | product=protein kinase, putative | location=LmxM.02:105378-106997(-) | length=1620 | sequence_SO=chromosome |	1620
LmxM.02.0300 | organism=Leishmania_mexicana_MHOM/GT/2001/U1103 | product=ABC1 transporter, putative | location=LmxM.02:110065-117423(-) | length=7359 | sequence_SO=chromosome | mapping	7362	7563	415	7148	101.376	LmxM.02.0300 | organism=Leishmania_mexicana_MHOM/GT/2001/U1103 | product=ABC1 transporter, putative | location=LmxM.02:110065-117423(-) | length=7359 | sequence_SO=chromosome |	7359
LmxM.02.0310 | organism=Leishmania_mexicana_MHOM/GT/2001/U1103 | product=unspecified product | location=LmxM.02:121563-123572(-) | length=2010 | sequence_SO=chromosome | mapping	2010	1908	322	1586	93.0393	LmxM.02.0310 | organism=Leishmania_mexicana_MHOM/GT/2001/U1103 | product=unspecified product | location=LmxM.02:121563-123572(-) | length=2010 | sequence_SO=chromosome |	2010
LmxM.02.0320 | organism=Leishmania_mexicana_MHOM/GT/2001/U1103 | product=ribosomal RNA processing protein, putative | location=LmxM.02:124572-125546(-) | length=975 | sequence_SO=chromosome | mapping	975	911	291	620	90.9928	LmxM.02.0320 | organism=Leishmania_mexicana_MHOM/GT/2001/U1103 | product=ribosomal RNA processing protein, putative | location=LmxM.02:124572-125546(-) | length=975 | sequence_SO=chromosome |	975
LmxM.02.0330 | organism=Leishmania_mexicana_MHOM/GT/2001/U1103 | product=unspecified product | location=LmxM.02:126998-128254(-) | length=1257 | sequence_SO=chromosome | mapping	1257	1165	263	902	90.6046	LmxM.02.0330 | organism=Leishmania_mexicana_MHOM/GT/2001/U1103 | product=unspecified product | location=LmxM.02:126998-128254(-) | length=1257 | sequence_SO=chromosome |	1257
LmxM.02.0340 | organism=Leishmania_mexicana_MHOM/GT/2001/U1103 | product=hypothetical protein, conserved | location=LmxM.02:130955-133777(-) | length=2823 | sequence_SO=chromosome | mapping	2822	3054	362	2692	105.508	LmxM.02.0340 | organism=Leishmania_mexicana_MHOM/GT/2001/U1103 | product=hypothetical protein, conserved | location=LmxM.02:130955-133777(-) | length=2823 | sequence_SO=chromosome |	2823
LmxM.02.0350 | organism=Leishmania_mexicana_MHOM/GT/2001/U1103 | product=hypothetical protein, conserved | location=LmxM.02:134971-138138(-) | length=3168 | sequence_SO=chromosome | mapping	3168	3235	327	2908	100.536	LmxM.02.0350 | organism=Leishmania_mexicana_MHOM/GT/2001/U1103 | product=hypothetical protein, conserved | location=LmxM.02:134971-138138(-) | length=3168 | sequence_SO=chromosome |	3168
LmxM.02.0360 | organism=Leishmania_mexicana_MHOM/GT/2001/U1103 | product=casein kinase II, alpha chain, putative | location=LmxM.02:139950-141095(-) | length=1146 | sequence_SO=chromosome | mapping	1146	1134	282	852	96.801	LmxM.02.0360 | organism=Leishmania_mexicana_MHOM/GT/2001/U1103 | product=casein kinase II, alpha chain, putative | location=LmxM.02:139950-141095(-) | length=1146 | sequence_SO=chromosome |	1146
LmxM.02.0370 | organism=Leishmania_mexicana_MHOM/GT/2001/U1103 | product=proteasome regulatory non-ATPase subunit 6, putative | location=LmxM.02:142555-144144(-) | length=1590 | sequence_SO=chromosome | mapping	1590	1813	329	1484	112.515	LmxM.02.0370 | organism=Leishmania_mexicana_MHOM/GT/2001/U1103 | product=proteasome regulatory non-ATPase subunit 6, putative | location=LmxM.02:142555-144144(-) | length=1590 | sequence_SO=chromosome |	1590
LmxM.02.0380 | organism=Leishmania_mexicana_MHOM/GT/2001/U1103 | product=FtsJ-like methyltransferase, putative | location=LmxM.02:145231-146595(-) | length=1365 | sequence_SO=chromosome | mapping	1365	1339	345	994	95.7773	LmxM.02.0380 | organism=Leishmania_mexicana_MHOM/GT/2001/U1103 | product=FtsJ-like methyltransferase, putative | location=LmxM.02:145231-146595(-) | length=1365 | sequence_SO=chromosome |	1365
LmxM.02.0390 | organism=Leishmania_mexicana_MHOM/GT/2001/U1103 | product=ubiquitin-conjugating enzyme E2, putative | location=LmxM.02:147736-148197(-) | length=462 | sequence_SO=chromosome | mapping	462	428	292	136	88.9156	LmxM.02.0390 | organism=Leishmania_mexicana_MHOM/GT/2001/U1103 | product=ubiquitin-conjugating enzyme E2, putative | location=LmxM.02:147736-148197(-) | length=462 | sequence_SO=chromosome |	462
LmxM.02.0400 | organism=Leishmania_mexicana_MHOM/GT/2001/U1103 | product=unspecified product | location=LmxM.02:148786-148965(-) | length=180 | sequence_SO=chromosome | mapping	140	124	124	0	59.4278	LmxM.02.0400 | organism=Leishmania_mexicana_MHOM/GT/2001/U1103 | product=unspecified product | location=LmxM.02:148786-148965(-) | length=180 | sequence_SO=chromosome |	180
LmxM.02.0410 | organism=Leishmania_mexicana_MHOM/GT/2001/U1103 | product=RNA-editing complex protein MP81, putative | location=LmxM.02:149742-152831(-) | length=3090 | sequence_SO=chromosome | mapping	3090	3030	308	2722	96.165	LmxM.02.0410 | organism=Leishmania_mexicana_MHOM/GT/2001/U1103 | product=RNA-editing complex protein MP81, putative | location=LmxM.02:149742-152831(-) | length=3090 | sequence_SO=chromosome |	3090
LmxM.02.0420 | organism=Leishmania_mexicana_MHOM/GT/2001/U1103 | product=hypothetical protein, conserved | location=LmxM.02:155278-158304(-) | length=3027 | sequence_SO=chromosome | mapping	3027	3025	351	2674	98.1255	LmxM.02.0420 | organism=Leishmania_mexicana_MHOM/GT/2001/U1103 | product=hypothetical protein, conserved | location=LmxM.02:155278-158304(-) | length=3027 | sequence_SO=chromosome |	3027
LmxM.02.0430 | organism=Leishmania_mexicana_MHOM/GT/2001/U1103 | product=rhomboid-like protein,serine peptidase, Clan S-, family S54, putative | location=LmxM.02:160557-161669(-) | length=1113 | sequence_SO=chromosome | mapping	1113	1113	271	842	98.2686	LmxM.02.0430 | organism=Leishmania_mexicana_MHOM/GT/2001/U1103 | product=rhomboid-like protein,serine peptidase, Clan S-, family S54, putative | location=LmxM.02:160557-161669(-) | length=1113 | sequence_SO=chromosome |	1113
LmxM.02.0440 | organism=Leishmania_mexicana_MHOM/GT/2001/U1103 | product=unspecified product | location=LmxM.02:163771-166088(-) | length=2318 | sequence_SO=chromosome | mapping	2310	2136	272	1864	89.9801	LmxM.02.0440 | organism=Leishmania_mexicana_MHOM/GT/2001/U1103 | product=unspecified product | location=LmxM.02:163771-166088(-) | length=2318 | sequence_SO=chromosome |	2313
LmxM.02.0450 | organism=Leishmania_mexicana_MHOM/GT/2001/U1103 | product=hypothetical protein, conserved | location=LmxM.02:166801-167634(-) | length=834 | sequence_SO=chromosome | mapping	834	749	237	512	87.1163	LmxM.02.0450 | organism=Leishmania_mexicana_MHOM/GT/2001/U1103 | product=hypothetical protein, conserved | location=LmxM.02:166801-167634(-) | length=834 | sequence_SO=chromosome |	834
LmxM.02.0460 | organism=Leishmania_mexicana_MHOM/GT/2001/U1103 | product=voltage-dependent anion-selective channel, putative (VDAC) | location=LmxM.02:171610-172485(-) | length=876 | sequence_SO=chromosome | mapping	876	865	177	688	95.7763	LmxM.02.0460 | organism=Leishmania_mexicana_MHOM/GT/2001/U1103 | product=voltage-dependent anion-selective channel, putative (VDAC) | location=LmxM.02:171610-172485(-) | length=876 | sequence_SO=chromosome |	876
LmxM.02.0470 | organism=Leishmania_mexicana_MHOM/GT/2001/U1103 | product=hypothetical protein, unknown function | location=LmxM.02:173829-182639(-) | length=8811 | sequence_SO=chromosome | mapping	8811	8589	349	8240	96.0498	LmxM.02.0470 | organism=Leishmania_mexicana_MHOM/GT/2001/U1103 | product=hypothetical protein, unknown function | location=LmxM.02:173829-182639(-) | length=8811 | sequence_SO=chromosome |	8811
LmxM.02.0480 | organism=Leishmania_mexicana_MHOM/GT/2001/U1103 | product=unspecified product | location=LmxM.02:185068-185673(-) | length=606 | sequence_SO=chromosome | mapping	606	628	364	264	99.401	LmxM.02.0480 | organism=Leishmania_mexicana_MHOM/GT/2001/U1103 | product=unspecified product | location=LmxM.02:185068-185673(-) | length=606 | sequence_SO=chromosome |	606
LmxM.02.0490 | organism=Leishmania_mexicana_MHOM/GT/2001/U1103 | product=hypothetical protein, conserved | location=LmxM.02:186489-188645(-) | length=2157 | sequence_SO=chromosome | mapping	2157	2061	323	1738	93.8535	LmxM.02.0490 | organism=Leishmania_mexicana_MHOM/GT/2001/U1103 | product=hypothetical protein, conserved | location=LmxM.02:186489-188645(-) | length=2157 | sequence_SO=chromosome |	2157
LmxM.02.0500 | organism=Leishmania_mexicana_MHOM/GT/2001/U1103 | product=hypothetical protein, conserved | location=LmxM.02:190431-193184(-) | length=2754 | sequence_SO=chromosome | mapping	2754	2765	303	2462	98.7015	LmxM.02.0500 | organism=Leishmania_mexicana_MHOM/GT/2001/U1103 | product=hypothetical protein, conserved | location=LmxM.02:190431-193184(-) | length=2754 | sequence_SO=chromosome |	2754
LmxM.02.0510 | organism=Leishmania_mexicana_MHOM/GT/2001/U1103 | product=hypothetical protein, conserved | location=LmxM.02:194460-194972(-) | length=513 | sequence_SO=chromosome | mapping	513	495	327	168	91.9415	LmxM.02.0510 | organism=Leishmania_mexicana_MHOM/GT/2001/U1103 | product=hypothetical protein, conserved | location=LmxM.02:194460-194972(-) | length=513 | sequence_SO=chromosome |	513
LmxM.02.0520 | organism=Leishmania_mexicana_MHOM/GT/2001/U1103 | product=hypothetical protein, conserved | location=LmxM.02:196480-202758(-) | length=6279 | sequence_SO=chromosome | mapping	6265	6367	371	5996	99.9221	LmxM.02.0520 | organism=Leishmania_mexicana_MHOM/GT/2001/U1103 | product=hypothetical protein, conserved | location=LmxM.02:196480-202758(-) | length=6279 | sequence_SO=chromosome |	6279
LmxM.02.0530 | organism=Leishmania_mexicana_MHOM/GT/2001/U1103 | product=hypothetical protein, conserved | location=LmxM.02:211112-213703(-) | length=2592 | sequence_SO=chromosome | mapping	2592	2584	344	2240	98.1046	LmxM.02.0530 | organism=Leishmania_mexicana_MHOM/GT/2001/U1103 | product=hypothetical protein, conserved | location=LmxM.02:211112-213703(-) | length=2592 | sequence_SO=chromosome |	2592
LmxM.02.0540 | organism=Leishmania_mexicana_MHOM/GT/2001/U1103 | product=hypothetical protein, conserved | location=LmxM.02:215088-216065(-) | length=978 | sequence_SO=chromosome | mapping	978	1013	331	682	100.902	LmxM.02.0540 | organism=Leishmania_mexicana_MHOM/GT/2001/U1103 | product=hypothetical protein, conserved | location=LmxM.02:215088-216065(-) | length=978 | sequence_SO=chromosome |	978
LmxM.02.0550 | organism=Leishmania_mexicana_MHOM/GT/2001/U1103 | product=hypothetical protein, unknown function | location=LmxM.02:218801-219292(-) | length=492 | sequence_SO=chromosome | mapping	492	504	298	206	98.2419	LmxM.02.0550 | organism=Leishmania_mexicana_MHOM/GT/2001/U1103 | product=hypothetical protein, unknown function | location=LmxM.02:218801-219292(-) | length=492 | sequence_SO=chromosome |	492
LmxM.02.0560 | organism=Leishmania_mexicana_MHOM/GT/2001/U1103 | product=hypothetical protein, unknown function | location=LmxM.02:220270-222813(-) | length=2544 | sequence_SO=chromosome | mapping	2544	2458	260	2198	94.943	LmxM.02.0560 | organism=Leishmania_mexicana_MHOM/GT/2001/U1103 | product=hypothetical protein, unknown function | location=LmxM.02:220270-222813(-) | length=2544 | sequence_SO=chromosome |	2544
LmxM.02.0570 | organism=Leishmania_mexicana_MHOM/GT/2001/U1103 | product=protein kinase, putative | location=LmxM.02:226730-231007(-) | length=4278 | sequence_SO=chromosome | mapping	4278	4755	373	4382	109.828	LmxM.02.0570 | organism=Leishmania_mexicana_MHOM/GT/2001/U1103 | product=protein kinase, putative | location=LmxM.02:226730-231007(-) | length=4278 | sequence_SO=chromosome |	4278
LmxM.02.0580 | organism=Leishmania_mexicana_MHOM/GT/2001/U1103 | product=hypothetical protein, conserved | location=LmxM.02:240917-252274(+) | length=11358 | sequence_SO=chromosome | mapping	11358	12684	476	12208	110.319	LmxM.02.0580 | organism=Leishmania_mexicana_MHOM/GT/2001/U1103 | product=hypothetical protein, conserved | location=LmxM.02:240917-252274(+) | length=11358 | sequence_SO=chromosome |	11358
LmxM.02.0590 | organism=Leishmania_mexicana_MHOM/GT/2001/U1103 | product=hypothetical protein, conserved | location=LmxM.02:253068-254639(+) | length=1572 | sequence_SO=chromosome | mapping	1572	1462	272	1190	91.1692	LmxM.02.0590 | organism=Leishmania_mexicana_MHOM/GT/2001/U1103 | product=hypothetical protein, conserved | location=LmxM.02:253068-254639(+) | length=1572 | sequence_SO=chromosome |	1572
LmxM.02.0600 | organism=Leishmania_mexicana_MHOM/GT/2001/U1103 | product=ARP2/3 complex subunit, putative | location=LmxM.02:255616-256248(+) | length=633 | sequence_SO=chromosome | mapping	633	612	362	250	92.6398	LmxM.02.0600 | organism=Leishmania_mexicana_MHOM/GT/2001/U1103 | product=ARP2/3 complex subunit, putative | location=LmxM.02:255616-256248(+) | length=633 | sequence_SO=chromosome |	633
LmxM.02.0610 | organism=Leishmania_mexicana_MHOM/GT/2001/U1103 | product=hypothetical protein, conserved | location=LmxM.02:257765-258730(+) | length=966 | sequence_SO=chromosome | mapping	966	968	340	628	97.7547	LmxM.02.0610 | organism=Leishmania_mexicana_MHOM/GT/2001/U1103 | product=hypothetical protein, conserved | location=LmxM.02:257765-258730(+) | length=966 | sequence_SO=chromosome |	966
LmxM.02.0620 | organism=Leishmania_mexicana_MHOM/GT/2001/U1103 | product=hypothetical protein, conserved | location=LmxM.02:259877-261613(+) | length=1737 | sequence_SO=chromosome | mapping	1737	1766	340	1426	99.8175	LmxM.02.0620 | organism=Leishmania_mexicana_MHOM/GT/2001/U1103 | product=hypothetical protein, conserved | location=LmxM.02:259877-261613(+) | length=1737 | sequence_SO=chromosome |	1737
LmxM.02.0630 | organism=Leishmania_mexicana_MHOM/GT/2001/U1103 | product=gamma-glutamyl phosphate reductase-like protein | location=LmxM.02:262515-264494(+) | length=1980 | sequence_SO=chromosome | mapping	1980	1977	335	1642	98.3005	LmxM.02.0630 | organism=Leishmania_mexicana_MHOM/GT/2001/U1103 | product=gamma-glutamyl phosphate reductase-like protein | location=LmxM.02:262515-264494(+) | length=1980 | sequence_SO=chromosome |	1980
LmxM.02.0640 | organism=Leishmania_mexicana_MHOM/GT/2001/U1103 | product=hypothetical protein, unknown function | location=LmxM.02:265630-269868(+) | length=4239 | sequence_SO=chromosome | mapping	4239	4281	387	3894	99.498	LmxM.02.0640 | organism=Leishmania_mexicana_MHOM/GT/2001/U1103 | product=hypothetical protein, unknown function | location=LmxM.02:265630-269868(+) | length=4239 | sequence_SO=chromosome |	4239
LmxM.02.0650 | organism=Leishmania_mexicana_MHOM/GT/2001/U1103 | product=hypothetical protein, conserved | location=LmxM.02:270393-271337(+) | length=945 | sequence_SO=chromosome | mapping	945	891	261	630	91.5386	LmxM.02.0650 | organism=Leishmania_mexicana_MHOM/GT/2001/U1103 | product=hypothetical protein, conserved | location=LmxM.02:270393-271337(+) | length=945 | sequence_SO=chromosome |	945
LmxM.02.0660 | organism=Leishmania_mexicana_MHOM/GT/2001/U1103 | product=hypothetical protein, conserved | location=LmxM.02:272118-274910(+) | length=2793 | sequence_SO=chromosome | mapping	2793	2674	320	2354	93.8844	LmxM.02.0660 | organism=Leishmania_mexicana_MHOM/GT/2001/U1103 | product=hypothetical protein, conserved | location=LmxM.02:272118-274910(+) | length=2793 | sequence_SO=chromosome |	2793
LmxM.02.0670 | organism=Leishmania_mexicana_MHOM/GT/2001/U1103 | product=mitochondrial carrier protein, putative | location=LmxM.02:275769-276710(+) | length=942 | sequence_SO=chromosome | mapping	942	899	301	598	93.3864	LmxM.02.0670 | organism=Leishmania_mexicana_MHOM/GT/2001/U1103 | product=mitochondrial carrier protein, putative | location=LmxM.02:275769-276710(+) | length=942 | sequence_SO=chromosome |	942
LmxM.02.0680 | organism=Leishmania_mexicana_MHOM/GT/2001/U1103 | product=hypothetical protein, conserved | location=LmxM.02:278439-278915(+) | length=477 | sequence_SO=chromosome | mapping	478	358	270	88	71.2977	LmxM.02.0680 | organism=Leishmania_mexicana_MHOM/GT/2001/U1103 | product=hypothetical protein, conserved | location=LmxM.02:278439-278915(+) | length=477 | sequence_SO=chromosome |	477
LmxM.02.0690 | organism=Leishmania_mexicana_MHOM/GT/2001/U1103 | product=hypothetical protein, conserved | location=LmxM.02:279932-281296(+) | length=1365 | sequence_SO=chromosome | mapping	1365	2585	661	1924	184.428	LmxM.02.0690 | organism=Leishmania_mexicana_MHOM/GT/2001/U1103 | product=hypothetical protein, conserved | location=LmxM.02:279932-281296(+) | length=1365 | sequence_SO=chromosome |	1365
LmxM.02.0700 | organism=Leishmania_mexicana_MHOM/GT/2001/U1103 | product=hypothetical protein, conserved | location=LmxM.02:282049-284862(+) | length=2814 | sequence_SO=chromosome | mapping	2814	5261	551	4710	184.349	LmxM.02.0700 | organism=Leishmania_mexicana_MHOM/GT/2001/U1103 | product=hypothetical protein, conserved | location=LmxM.02:282049-284862(+) | length=2814 | sequence_SO=chromosome |	2814
LmxM.02.0710 | organism=Leishmania_mexicana_MHOM/GT/2001/U1103 | product=ATP-dependent Clp protease subunit, heat shock protein 78 (HSP78), putative,serine peptidase, putative | location=LmxM.02:286574-289027(+) | length=2454 | sequence_SO=chromosome | mapping	2454	4600	612	3988	184.076	LmxM.02.0710 | organism=Leishmania_mexicana_MHOM/GT/2001/U1103 | product=ATP-dependent Clp protease subunit, heat shock protein 78 (HSP78), putative,serine peptidase, putative | location=LmxM.02:286574-289027(+) | length=2454 | sequence_SO=chromosome |	2454
LmxM.02.0720 | organism=Leishmania_mexicana_MHOM/GT/2001/U1103 | product=hypothetical protein, unknown function | location=LmxM.02:290122-290364(+) | length=243 | sequence_SO=chromosome | mapping	243	443	439	4	168.844	LmxM.02.0720 | organism=Leishmania_mexicana_MHOM/GT/2001/U1103 | product=hypothetical protein, unknown function | location=LmxM.02:290122-290364(+) | length=243 | sequence_SO=chromosome |	243
LmxM.02.0730 | organism=Leishmania_mexicana_MHOM/GT/2001/U1103 | product=dehydrogenase/oxidoreductase-like protein | location=LmxM.02:291547-291720(+) | length=174 | sequence_SO=chromosome | mapping	174	282	278	4	146.644	LmxM.02.0730 | organism=Leishmania_mexicana_MHOM/GT/2001/U1103 | product=dehydrogenase/oxidoreductase-like protein | location=LmxM.02:291547-291720(+) | length=174 | sequence_SO=chromosome |	174
LmxM.02.0740 | organism=Leishmania_mexicana_MHOM/GT/2001/U1103 | product=peptidyl dipeptidase, putative,metallo-peptidase, Clan MA(E), Family M3 | location=LmxM.02:292757-294793(+) | length=2037 | sequence_SO=chromosome | mapping	2037	3982	710	3272	192.139	LmxM.02.0740 | organism=Leishmania_mexicana_MHOM/GT/2001/U1103 | product=peptidyl dipeptidase, putative,metallo-peptidase, Clan MA(E), Family M3 | location=LmxM.02:292757-294793(+) | length=2037 | sequence_SO=chromosome |	2037
LmxM.03.0010 | organism=Leishmania_mexicana_MHOM/GT/2001/U1103 | product=hypothetical protein | location=LmxM.03:2397-5330(-) | length=2934 | sequence_SO=chromosome | mapping	2934	2963	307	2656	99.6043	LmxM.03.0010 | organism=Leishmania_mexicana_MHOM/GT/2001/U1103 | product=hypothetical protein | location=LmxM.03:2397-5330(-) | length=2934 | sequence_SO=chromosome |	2934
LmxM.03.0020 | organism=Leishmania_mexicana_MHOM/GT/2001/U1103 | product=hypothetical protein, conserved | location=LmxM.03:6718-7521(+) | length=804 | sequence_SO=chromosome | mapping	804	805	375	430	97.3943	LmxM.03.0020 | organism=Leishmania_mexicana_MHOM/GT/2001/U1103 | product=hypothetical protein, conserved | location=LmxM.03:6718-7521(+) | length=804 | sequence_SO=chromosome |	804
LmxM.03.0030 | organism=Leishmania_mexicana_MHOM/GT/2001/U1103 | product=D-3-phosphoglycerate dehydrogenase-like protein | location=LmxM.03:8255-9478(+) | length=1224 | sequence_SO=chromosome | mapping	1224	1243	399	844	99.8219	LmxM.03.0030 | organism=Leishmania_mexicana_MHOM/GT/2001/U1103 | product=D-3-phosphoglycerate dehydrogenase-like protein | location=LmxM.03:8255-9478(+) | length=1224 | sequence_SO=chromosome |	1224
LmxM.03.0040 | organism=Leishmania_mexicana_MHOM/GT/2001/U1103 | product=2-aminoethylphosphonate:pyruvateaminotransferas e-like protein | location=LmxM.03:10431-11531(+) | length=1101 | sequence_SO=chromosome | mapping	1101	1070	338	732	95.3115	LmxM.03.0040 | organism=Leishmania_mexicana_MHOM/GT/2001/U1103 | product=2-aminoethylphosphonate:pyruvateaminotransferas e-like protein | location=LmxM.03:10431-11531(+) | length=1101 | sequence_SO=chromosome |	1101
LmxM.03.0060 | organism=Leishmania_mexicana_MHOM/GT/2001/U1103 | product=hypothetical protein, conserved | location=LmxM.03:14981-15946(+) | length=966 | sequence_SO=chromosome | mapping	966	932	314	618	94.2899	LmxM.03.0060 | organism=Leishmania_mexicana_MHOM/GT/2001/U1103 | product=hypothetical protein, conserved | location=LmxM.03:14981-15946(+) | length=966 | sequence_SO=chromosome |	966
LmxM.03.0070 | organism=Leishmania_mexicana_MHOM/GT/2001/U1103 | product=hypothetical protein, conserved | location=LmxM.03:16897-19218(+) | length=2322 | sequence_SO=chromosome | mapping	2322	2413	327	2086	102.358	LmxM.03.0070 | organism=Leishmania_mexicana_MHOM/GT/2001/U1103 | product=hypothetical protein, conserved | location=LmxM.03:16897-19218(+) | length=2322 | sequence_SO=chromosome |	2322
LmxM.03.0080 | organism=Leishmania_mexicana_MHOM/GT/2001/U1103 | product=glycerol-3-phosphate acyl transferase | location=LmxM.03:20144-21826(+) | length=1683 | sequence_SO=chromosome | mapping	1683	1603	331	1272	93.7671	LmxM.03.0080 | organism=Leishmania_mexicana_MHOM/GT/2001/U1103 | product=glycerol-3-phosphate acyl transferase | location=LmxM.03:20144-21826(+) | length=1683 | sequence_SO=chromosome |	1683
LmxM.03.0090 | organism=Leishmania_mexicana_MHOM/GT/2001/U1103 | product=DNA primase large subunit, putative (pril) | location=LmxM.03:23092-24702(+) | length=1611 | sequence_SO=chromosome | mapping	1611	1396	318	1078	84.5717	LmxM.03.0090 | organism=Leishmania_mexicana_MHOM/GT/2001/U1103 | product=DNA primase large subunit, putative (pril) | location=LmxM.03:23092-24702(+) | length=1611 | sequence_SO=chromosome |	1611
LmxM.03.0100 | organism=Leishmania_mexicana_MHOM/GT/2001/U1103 | product=cytochrome c oxidase assembly protein, putative | location=LmxM.03:26170-26664(+) | length=495 | sequence_SO=chromosome | mapping	495	466	294	172	90.8081	LmxM.03.0100 | organism=Leishmania_mexicana_MHOM/GT/2001/U1103 | product=cytochrome c oxidase assembly protein, putative | location=LmxM.03:26170-26664(+) | length=495 | sequence_SO=chromosome |	495
LmxM.03.0110 | organism=Leishmania_mexicana_MHOM/GT/2001/U1103 | product=hypothetical protein, conserved | location=LmxM.03:27961-30645(+) | length=2685 | sequence_SO=chromosome | mapping	2685	2562	320	2242	93.8365	LmxM.03.0110 | organism=Leishmania_mexicana_MHOM/GT/2001/U1103 | product=hypothetical protein, conserved | location=LmxM.03:27961-30645(+) | length=2685 | sequence_SO=chromosome |	2685
LmxM.03.0120 | organism=Leishmania_mexicana_MHOM/GT/2001/U1103 | product=hypothetical protein, conserved | location=LmxM.03:31389-34166(+) | length=2778 | sequence_SO=chromosome | mapping	2778	2610	304	2306	92.2847	LmxM.03.0120 | organism=Leishmania_mexicana_MHOM/GT/2001/U1103 | product=hypothetical protein, conserved | location=LmxM.03:31389-34166(+) | length=2778 | sequence_SO=chromosome |	2778
LmxM.03.0130 | organism=Leishmania_mexicana_MHOM/GT/2001/U1103 | product=acetyltransferase, putative | location=LmxM.03:35126-35674(+) | length=549 | sequence_SO=chromosome | mapping	549	575	321	254	102	LmxM.03.0130 | organism=Leishmania_mexicana_MHOM/GT/2001/U1103 | product=acetyltransferase, putative | location=LmxM.03:35126-35674(+) | length=549 | sequence_SO=chromosome |	549
LmxM.03.0140 | organism=Leishmania_mexicana_MHOM/GT/2001/U1103 | product=hypothetical protein, conserved | location=LmxM.03:36586-37005(+) | length=420 | sequence_SO=chromosome | mapping	420	342	266	76	78.1024	LmxM.03.0140 | organism=Leishmania_mexicana_MHOM/GT/2001/U1103 | product=hypothetical protein, conserved | location=LmxM.03:36586-37005(+) | length=420 | sequence_SO=chromosome |	420
LmxM.03.0150 | organism=Leishmania_mexicana_MHOM/GT/2001/U1103 | product=hypothetical protein, conserved | location=LmxM.03:38089-39024(+) | length=936 | sequence_SO=chromosome | mapping	936	870	296	574	90.2799	LmxM.03.0150 | organism=Leishmania_mexicana_MHOM/GT/2001/U1103 | product=hypothetical protein, conserved | location=LmxM.03:38089-39024(+) | length=936 | sequence_SO=chromosome |	936
LmxM.03.0160 | organism=Leishmania_mexicana_MHOM/GT/2001/U1103 | product=ABC transporter protein, putative | location=LmxM.03:39893-42067(+) | length=2175 | sequence_SO=chromosome | mapping	2175	2065	191	1874	93.3044	LmxM.03.0160 | organism=Leishmania_mexicana_MHOM/GT/2001/U1103 | product=ABC transporter protein, putative | location=LmxM.03:39893-42067(+) | length=2175 | sequence_SO=chromosome |	2175
LmxM.03.0170 | organism=Leishmania_mexicana_MHOM/GT/2001/U1103 | product=hypothetical protein | location=LmxM.03:43010-43591(+) | length=582 | sequence_SO=chromosome | mapping	582	610	322	288	100.589	LmxM.03.0170 | organism=Leishmania_mexicana_MHOM/GT/2001/U1103 | product=hypothetical protein | location=LmxM.03:43010-43591(+) | length=582 | sequence_SO=chromosome |	582
LmxM.03.0180 | organism=Leishmania_mexicana_MHOM/GT/2001/U1103 | product=hypothetical protein, conserved | location=LmxM.03:44575-46122(+) | length=1548 | sequence_SO=chromosome | mapping	1548	1663	379	1284	105.249	LmxM.03.0180 | organism=Leishmania_mexicana_MHOM/GT/2001/U1103 | product=hypothetical protein, conserved | location=LmxM.03:44575-46122(+) | length=1548 | sequence_SO=chromosome |	1548
LmxM.03.0190 | organism=Leishmania_mexicana_MHOM/GT/2001/U1103 | product=U2 splicing auxiliary factor, putative | location=LmxM.03:47033-47665(+) | length=633 | sequence_SO=chromosome | mapping	633	661	381	280	101.131	LmxM.03.0190 | organism=Leishmania_mexicana_MHOM/GT/2001/U1103 | product=U2 splicing auxiliary factor, putative | location=LmxM.03:47033-47665(+) | length=633 | sequence_SO=chromosome |	633
LmxM.03.0200 | organism=Leishmania_mexicana_MHOM/GT/2001/U1103 | product=delta-1-pyrroline-5-carboxylate dehydrogenase, putative | location=LmxM.03:49414-51030(+) | length=1617 | sequence_SO=chromosome | mapping	1617	1706	340	1366	103.453	LmxM.03.0200 | organism=Leishmania_mexicana_MHOM/GT/2001/U1103 | product=delta-1-pyrroline-5-carboxylate dehydrogenase, putative | location=LmxM.03:49414-51030(+) | length=1617 | sequence_SO=chromosome |	1617
LmxM.03.0210 | organism=Leishmania_mexicana_MHOM/GT/2001/U1103 | product=protein kinase, putative | location=LmxM.03:52958-53821(+) | length=864 | sequence_SO=chromosome | mapping	864	916	354	562	103	LmxM.03.0210 | organism=Leishmania_mexicana_MHOM/GT/2001/U1103 | product=protein kinase, putative | location=LmxM.03:52958-53821(+) | length=864 | sequence_SO=chromosome |	864
LmxM.03.0220 | organism=Leishmania_mexicana_MHOM/GT/2001/U1103 | product=hypothetical protein, conserved | location=LmxM.03:54935-55861(+) | length=927 | sequence_SO=chromosome | mapping	927	951	317	634	99.7087	LmxM.03.0220 | organism=Leishmania_mexicana_MHOM/GT/2001/U1103 | product=hypothetical protein, conserved | location=LmxM.03:54935-55861(+) | length=927 | sequence_SO=chromosome |	927
LmxM.03.0230 | organism=Leishmania_mexicana_MHOM/GT/2001/U1103 | product=long chain fatty Acyl CoA synthetase, putative | location=LmxM.03:56984-58954(+) | length=1971 | sequence_SO=chromosome | mapping	1971	2056	310	1746	102.425	LmxM.03.0230 | organism=Leishmania_mexicana_MHOM/GT/2001/U1103 | product=long chain fatty Acyl CoA synthetase, putative | location=LmxM.03:56984-58954(+) | length=1971 | sequence_SO=chromosome |	1971
LmxM.03.0240 | organism=Leishmania_mexicana_MHOM/GT/2001/U1103 | product=hypothetical protein, conserved | location=LmxM.03:62298-62735(+) | length=438 | sequence_SO=chromosome | mapping	438	401	289	112	87.121	LmxM.03.0240 | organism=Leishmania_mexicana_MHOM/GT/2001/U1103 | product=hypothetical protein, conserved | location=LmxM.03:62298-62735(+) | length=438 | sequence_SO=chromosome |	438
LmxM.03.0250 | organism=Leishmania_mexicana_MHOM/GT/2001/U1103 | product=ribosomal protein L38, putative | location=LmxM.03:63291-63542(+) | length=252 | sequence_SO=chromosome | mapping	252	211	207	4	76.2183	LmxM.03.0250 | organism=Leishmania_mexicana_MHOM/GT/2001/U1103 | product=ribosomal protein L38, putative | location=LmxM.03:63291-63542(+) | length=252 | sequence_SO=chromosome |	252
LmxM.03.0260 | organism=Leishmania_mexicana_MHOM/GT/2001/U1103 | product=hypothetical protein, conserved | location=LmxM.03:64785-65678(+) | length=894 | sequence_SO=chromosome | mapping	894	847	331	516	91.8378	LmxM.03.0260 | organism=Leishmania_mexicana_MHOM/GT/2001/U1103 | product=hypothetical protein, conserved | location=LmxM.03:64785-65678(+) | length=894 | sequence_SO=chromosome |	894
LmxM.03.0270 | organism=Leishmania_mexicana_MHOM/GT/2001/U1103 | product=hypothetical protein | location=LmxM.03:67119-71237(+) | length=4119 | sequence_SO=chromosome | mapping	4119	4948	516	4432	116.621	LmxM.03.0270 | organism=Leishmania_mexicana_MHOM/GT/2001/U1103 | product=hypothetical protein | location=LmxM.03:67119-71237(+) | length=4119 | sequence_SO=chromosome |	4119
LmxM.03.0280 | organism=Leishmania_mexicana_MHOM/GT/2001/U1103 | product=hypothetical protein | location=LmxM.03:72222-75035(+) | length=2814 | sequence_SO=chromosome | mapping	2814	2793	359	2434	97.3607	LmxM.03.0280 | organism=Leishmania_mexicana_MHOM/GT/2001/U1103 | product=hypothetical protein | location=LmxM.03:72222-75035(+) | length=2814 | sequence_SO=chromosome |	2814
LmxM.03.0290 | organism=Leishmania_mexicana_MHOM/GT/2001/U1103 | product=unspecified product | location=LmxM.03:75541-76671(+) | length=1131 | sequence_SO=chromosome | mapping	1131	1011	305	706	86.6083	LmxM.03.0290 | organism=Leishmania_mexicana_MHOM/GT/2001/U1103 | product=unspecified product | location=LmxM.03:75541-76671(+) | length=1131 | sequence_SO=chromosome |	1131
LmxM.03.0310 | organism=Leishmania_mexicana_MHOM/GT/2001/U1103 | product=unspecified product | location=LmxM.03:79966-86154(+) | length=6189 | sequence_SO=chromosome | mapping	6186	6303	379	5924	100.241	LmxM.03.0310 | organism=Leishmania_mexicana_MHOM/GT/2001/U1103 | product=unspecified product | location=LmxM.03:79966-86154(+) | length=6189 | sequence_SO=chromosome |	6189
LmxM.03.0320 | organism=Leishmania_mexicana_MHOM/GT/2001/U1103 | product=hypothetical protein, conserved | location=LmxM.03:87091-90123(+) | length=3033 | sequence_SO=chromosome | mapping	3033	3077	289	2788	100.006	LmxM.03.0320 | organism=Leishmania_mexicana_MHOM/GT/2001/U1103 | product=hypothetical protein, conserved | location=LmxM.03:87091-90123(+) | length=3033 | sequence_SO=chromosome |	3033
LmxM.03.0330 | organism=Leishmania_mexicana_MHOM/GT/2001/U1103 | product=hypothetical protein, conserved | location=LmxM.03:91227-93122(+) | length=1896 | sequence_SO=chromosome | mapping	1896	1859	337	1522	96.4562	LmxM.03.0330 | organism=Leishmania_mexicana_MHOM/GT/2001/U1103 | product=hypothetical protein, conserved | location=LmxM.03:91227-93122(+) | length=1896 | sequence_SO=chromosome |	1896
LmxM.03.0340 | organism=Leishmania_mexicana_MHOM/GT/2001/U1103 | product=hypothetical protein, conserved | location=LmxM.03:93827-94933(+) | length=1107 | sequence_SO=chromosome | mapping	1107	1100	266	834	96.9024	LmxM.03.0340 | organism=Leishmania_mexicana_MHOM/GT/2001/U1103 | product=hypothetical protein, conserved | location=LmxM.03:93827-94933(+) | length=1107 | sequence_SO=chromosome |	1107
LmxM.03.0350 | organism=Leishmania_mexicana_MHOM/GT/2001/U1103 | product=unspecified product | location=LmxM.03:96108-100268(+) | length=4161 | sequence_SO=chromosome | mapping	4161	4012	330	3682	95.0553	LmxM.03.0350 | organism=Leishmania_mexicana_MHOM/GT/2001/U1103 | product=unspecified product | location=LmxM.03:96108-100268(+) | length=4161 | sequence_SO=chromosome |	4161
LmxM.03.0360 | organism=Leishmania_mexicana_MHOM/GT/2001/U1103 | product=unspecified product | location=LmxM.03:103261-108153(+) | length=4893 | sequence_SO=chromosome | mapping	4893	4829	243	4586	97.2283	LmxM.03.0360 | organism=Leishmania_mexicana_MHOM/GT/2001/U1103 | product=unspecified product | location=LmxM.03:103261-108153(+) | length=4893 | sequence_SO=chromosome |	4893
LmxM.03.0370 | organism=Leishmania_mexicana_MHOM/GT/2001/U1103 | product=hypothetical protein, conserved | location=LmxM.03:111440-112315(+) | length=876 | sequence_SO=chromosome | mapping	876	824	272	552	91.9783	LmxM.03.0370 | organism=Leishmania_mexicana_MHOM/GT/2001/U1103 | product=hypothetical protein, conserved | location=LmxM.03:111440-112315(+) | length=876 | sequence_SO=chromosome |	876
LmxM.03.0380 | organism=Leishmania_mexicana_MHOM/GT/2001/U1103 | product=unspecified product | location=LmxM.03:114999-116117(+) | length=1119 | sequence_SO=chromosome | mapping	1119	1128	380	748	98.4173	LmxM.03.0380 | organism=Leishmania_mexicana_MHOM/GT/2001/U1103 | product=unspecified product | location=LmxM.03:114999-116117(+) | length=1119 | sequence_SO=chromosome |	1119
LmxM.03.0390 | organism=Leishmania_mexicana_MHOM/GT/2001/U1103 | product=unspecified product | location=LmxM.03:118280-119627(+) | length=1348 | sequence_SO=chromosome | mapping	1344	885	331	554	61.513	LmxM.03.0390 | organism=Leishmania_mexicana_MHOM/GT/2001/U1103 | product=unspecified product | location=LmxM.03:118280-119627(+) | length=1348 | sequence_SO=chromosome |	1347
LmxM.03.0400 | organism=Leishmania_mexicana_MHOM/GT/2001/U1103 | product=unspecified product | location=LmxM.03:120511-121395(+) | length=885 | sequence_SO=chromosome | mapping	885	723	239	484	79.6169	LmxM.03.0400 | organism=Leishmania_mexicana_MHOM/GT/2001/U1103 | product=unspecified product | location=LmxM.03:120511-121395(+) | length=885 | sequence_SO=chromosome |	885
LmxM.03.0410 | organism=Leishmania_mexicana_MHOM/GT/2001/U1103 | product=unspecified product | location=LmxM.03:124634-126607(+) | length=1974 | sequence_SO=chromosome | mapping	1974	1913	307	1606	95.1672	LmxM.03.0410 | organism=Leishmania_mexicana_MHOM/GT/2001/U1103 | product=unspecified product | location=LmxM.03:124634-126607(+) | length=1974 | sequence_SO=chromosome |	1974
LmxM.03.0420 | organism=Leishmania_mexicana_MHOM/GT/2001/U1103 | product=hypothetical protein, conserved | location=LmxM.03:129106-134181(+) | length=5076 | sequence_SO=chromosome | mapping	5076	5123	317	4806	99.4563	LmxM.03.0420 | organism=Leishmania_mexicana_MHOM/GT/2001/U1103 | product=hypothetical protein, conserved | location=LmxM.03:129106-134181(+) | length=5076 | sequence_SO=chromosome |	5076
LmxM.03.0430 | organism=Leishmania_mexicana_MHOM/GT/2001/U1103 | product=60S acidic ribosomal protein P2, putative | location=LmxM.03:135335-135628(+) | length=294 | sequence_SO=chromosome | mapping	294	200	192	8	64.7653	LmxM.03.0430 | organism=Leishmania_mexicana_MHOM/GT/2001/U1103 | product=60S acidic ribosomal protein P2, putative | location=LmxM.03:135335-135628(+) | length=294 | sequence_SO=chromosome |	294
LmxM.03.0440 | organism=Leishmania_mexicana_MHOM/GT/2001/U1103 | product=60S acidic ribosomal protein P2, putative | location=LmxM.03:136543-136875(+) | length=333 | sequence_SO=chromosome | mapping	333	380	310	70	105.901	LmxM.03.0440 | organism=Leishmania_mexicana_MHOM/GT/2001/U1103 | product=60S acidic ribosomal protein P2, putative | location=LmxM.03:136543-136875(+) | length=333 | sequence_SO=chromosome |	333
LmxM.03.0450 | organism=Leishmania_mexicana_MHOM/GT/2001/U1103 | product=TLD domain protein, conserved | location=LmxM.03:138020-142777(+) | length=4758 | sequence_SO=chromosome | mapping	4758	4886	378	4508	101.232	LmxM.03.0450 | organism=Leishmania_mexicana_MHOM/GT/2001/U1103 | product=TLD domain protein, conserved | location=LmxM.03:138020-142777(+) | length=4758 | sequence_SO=chromosome |	4758
LmxM.03.0460 | organism=Leishmania_mexicana_MHOM/GT/2001/U1103 | product=hypothetical protein | location=LmxM.03:148718-151870(+) | length=3153 | sequence_SO=chromosome | mapping	3153	3075	277	2798	95.5325	LmxM.03.0460 | organism=Leishmania_mexicana_MHOM/GT/2001/U1103 | product=hypothetical protein | location=LmxM.03:148718-151870(+) | length=3153 | sequence_SO=chromosome |	3153
LmxM.03.0470 | organism=Leishmania_mexicana_MHOM/GT/2001/U1103 | product=hypothetical protein, conserved | location=LmxM.03:155562-158462(+) | length=2901 | sequence_SO=chromosome | mapping	2901	2798	284	2514	94.7001	LmxM.03.0470 | organism=Leishmania_mexicana_MHOM/GT/2001/U1103 | product=hypothetical protein, conserved | location=LmxM.03:155562-158462(+) | length=2901 | sequence_SO=chromosome |	2901
LmxM.03.0480 | organism=Leishmania_mexicana_MHOM/GT/2001/U1103 | product=hypothetical protein, conserved | location=LmxM.03:159956-162970(+) | length=3015 | sequence_SO=chromosome | mapping	3015	3000	292	2708	98.0454	LmxM.03.0480 | organism=Leishmania_mexicana_MHOM/GT/2001/U1103 | product=hypothetical protein, conserved | location=LmxM.03:159956-162970(+) | length=3015 | sequence_SO=chromosome |	3015
LmxM.03.0490 | organism=Leishmania_mexicana_MHOM/GT/2001/U1103 | product=hypothetical protein, conserved | location=LmxM.03:164747-167707(+) | length=2961 | sequence_SO=chromosome | mapping	2961	2926	296	2630	97.0709	LmxM.03.0490 | organism=Leishmania_mexicana_MHOM/GT/2001/U1103 | product=hypothetical protein, conserved | location=LmxM.03:164747-167707(+) | length=2961 | sequence_SO=chromosome |	2961
LmxM.03.0500 | organism=Leishmania_mexicana_MHOM/GT/2001/U1103 | product=phosphate-Repressible Phosphate Permease-like protein | location=LmxM.03:168818-170413(+) | length=1596 | sequence_SO=chromosome | mapping	1596	1541	261	1280	94.4135	LmxM.03.0500 | organism=Leishmania_mexicana_MHOM/GT/2001/U1103 | product=phosphate-Repressible Phosphate Permease-like protein | location=LmxM.03:168818-170413(+) | length=1596 | sequence_SO=chromosome |	1596
LmxM.03.0510 | organism=Leishmania_mexicana_MHOM/GT/2001/U1103 | product=hypothetical protein, conserved | location=LmxM.03:173249-180775(+) | length=7527 | sequence_SO=chromosome | mapping	7527	7484	304	7180	97.8497	LmxM.03.0510 | organism=Leishmania_mexicana_MHOM/GT/2001/U1103 | product=hypothetical protein, conserved | location=LmxM.03:173249-180775(+) | length=7527 | sequence_SO=chromosome |	7527
LmxM.03.0520 | organism=Leishmania_mexicana_MHOM/GT/2001/U1103 | product=hypothetical protein, conserved | location=LmxM.03:181452-183998(+) | length=2547 | sequence_SO=chromosome | mapping	2547	2394	310	2084	92.4287	LmxM.03.0520 | organism=Leishmania_mexicana_MHOM/GT/2001/U1103 | product=hypothetical protein, conserved | location=LmxM.03:181452-183998(+) | length=2547 | sequence_SO=chromosome |	2547
LmxM.03.0530 | organism=Leishmania_mexicana_MHOM/GT/2001/U1103 | product=hypothetical protein, conserved | location=LmxM.03:186031-192171(+) | length=6141 | sequence_SO=chromosome | mapping	6141	6128	376	5752	98.3363	LmxM.03.0530 | organism=Leishmania_mexicana_MHOM/GT/2001/U1103 | product=hypothetical protein, conserved | location=LmxM.03:186031-192171(+) | length=6141 | sequence_SO=chromosome |	6141
LmxM.03.0540 | organism=Leishmania_mexicana_MHOM/GT/2001/U1103 | product=26S protease regulatory subunit, putative,serine peptidase, Clan SJ, family S16, putative | location=LmxM.03:193496-194686(+) | length=1191 | sequence_SO=chromosome | mapping	1191	1144	298	846	93.9647	LmxM.03.0540 | organism=Leishmania_mexicana_MHOM/GT/2001/U1103 | product=26S protease regulatory subunit, putative,serine peptidase, Clan SJ, family S16, putative | location=LmxM.03:193496-194686(+) | length=1191 | sequence_SO=chromosome |	1191
LmxM.03.0550 | organism=Leishmania_mexicana_MHOM/GT/2001/U1103 | product=hypothetical protein, conserved | location=LmxM.03:196070-200071(+) | length=4002 | sequence_SO=chromosome | mapping	4002	3843	303	3540	94.502	LmxM.03.0550 | organism=Leishmania_mexicana_MHOM/GT/2001/U1103 | product=hypothetical protein, conserved | location=LmxM.03:196070-200071(+) | length=4002 | sequence_SO=chromosome |	4002
LmxM.03.0560 | organism=Leishmania_mexicana_MHOM/GT/2001/U1103 | product=hypothetical protein | location=LmxM.03:201739-203784(+) | length=2046 | sequence_SO=chromosome | mapping	2046	2031	339	1692	97.8309	LmxM.03.0560 | organism=Leishmania_mexicana_MHOM/GT/2001/U1103 | product=hypothetical protein | location=LmxM.03:201739-203784(+) | length=2046 | sequence_SO=chromosome |	2046
LmxM.03.0570 | organism=Leishmania_mexicana_MHOM/GT/2001/U1103 | product=quinone oxidoreductase, putative | location=LmxM.03:206158-207156(+) | length=999 | sequence_SO=chromosome | mapping	999	876	278	598	84.6446	LmxM.03.0570 | organism=Leishmania_mexicana_MHOM/GT/2001/U1103 | product=quinone oxidoreductase, putative | location=LmxM.03:206158-207156(+) | length=999 | sequence_SO=chromosome |	999
LmxM.03.0580 | organism=Leishmania_mexicana_MHOM/GT/2001/U1103 | product=hypothetical protein, conserved | location=LmxM.03:207569-208105(+) | length=537 | sequence_SO=chromosome | mapping	537	437	225	212	78.0205	LmxM.03.0580 | organism=Leishmania_mexicana_MHOM/GT/2001/U1103 | product=hypothetical protein, conserved | location=LmxM.03:207569-208105(+) | length=537 | sequence_SO=chromosome |	537
LmxM.03.0590 | organism=Leishmania_mexicana_MHOM/GT/2001/U1103 | product=DNA repair helicase, putative | location=LmxM.03:209608-213810(+) | length=4203 | sequence_SO=chromosome | mapping	4203	4206	396	3810	98.1616	LmxM.03.0590 | organism=Leishmania_mexicana_MHOM/GT/2001/U1103 | product=DNA repair helicase, putative | location=LmxM.03:209608-213810(+) | length=4203 | sequence_SO=chromosome |	4203
LmxM.03.0600 | organism=Leishmania_mexicana_MHOM/GT/2001/U1103 | product=arginine N-methyltransferase, putative | location=LmxM.03:214461-215660(+) | length=1200 | sequence_SO=chromosome | mapping	1200	1163	281	882	94.4125	LmxM.03.0600 | organism=Leishmania_mexicana_MHOM/GT/2001/U1103 | product=arginine N-methyltransferase, putative | location=LmxM.03:214461-215660(+) | length=1200 | sequence_SO=chromosome |	1200
LmxM.03.0610 | organism=Leishmania_mexicana_MHOM/GT/2001/U1103 | product=kinase-like protein | location=LmxM.03:217445-218437(+) | length=993 | sequence_SO=chromosome | mapping	993	938	314	624	92.4451	LmxM.03.0610 | organism=Leishmania_mexicana_MHOM/GT/2001/U1103 | product=kinase-like protein | location=LmxM.03:217445-218437(+) | length=993 | sequence_SO=chromosome |	993
LmxM.03.0620 | organism=Leishmania_mexicana_MHOM/GT/2001/U1103 | product=mitochondrial protein 99, putative (MP99) | location=LmxM.03:219576-221543(+) | length=1968 | sequence_SO=chromosome | mapping	1968	2046	284	1762	102.155	LmxM.03.0620 | organism=Leishmania_mexicana_MHOM/GT/2001/U1103 | product=mitochondrial protein 99, putative (MP99) | location=LmxM.03:219576-221543(+) | length=1968 | sequence_SO=chromosome |	1968
LmxM.03.0630 | organism=Leishmania_mexicana_MHOM/GT/2001/U1103 | product=hypothetical protein, conserved | location=LmxM.03:223028-223996(+) | length=969 | sequence_SO=chromosome | mapping	969	972	272	700	98.2291	LmxM.03.0630 | organism=Leishmania_mexicana_MHOM/GT/2001/U1103 | product=hypothetical protein, conserved | location=LmxM.03:223028-223996(+) | length=969 | sequence_SO=chromosome |	969
LmxM.03.0640 | organism=Leishmania_mexicana_MHOM/GT/2001/U1103 | product=hypothetical protein, conserved | location=LmxM.03:224790-226532(+) | length=1743 | sequence_SO=chromosome | mapping	1743	1783	281	1502	100.165	LmxM.03.0640 | organism=Leishmania_mexicana_MHOM/GT/2001/U1103 | product=hypothetical protein, conserved | location=LmxM.03:224790-226532(+) | length=1743 | sequence_SO=chromosome |	1743
LmxM.03.0650 | organism=Leishmania_mexicana_MHOM/GT/2001/U1103 | product=hypothetical protein | location=LmxM.03:228679-231357(+) | length=2679 | sequence_SO=chromosome | mapping	2679	2595	259	2336	95.234	LmxM.03.0650 | organism=Leishmania_mexicana_MHOM/GT/2001/U1103 | product=hypothetical protein | location=LmxM.03:228679-231357(+) | length=2679 | sequence_SO=chromosome |	2679
LmxM.03.0660 | organism=Leishmania_mexicana_MHOM/GT/2001/U1103 | product=hypothetical protein, conserved | location=LmxM.03:233034-235490(+) | length=2457 | sequence_SO=chromosome | mapping	2457	2490	330	2160	99.4815	LmxM.03.0660 | organism=Leishmania_mexicana_MHOM/GT/2001/U1103 | product=hypothetical protein, conserved | location=LmxM.03:233034-235490(+) | length=2457 | sequence_SO=chromosome |	2457
LmxM.03.0670 | organism=Leishmania_mexicana_MHOM/GT/2001/U1103 | product=hypothetical protein, conserved | location=LmxM.03:236375-237994(+) | length=1620 | sequence_SO=chromosome | mapping	1620	1603	345	1258	96.6049	LmxM.03.0670 | organism=Leishmania_mexicana_MHOM/GT/2001/U1103 | product=hypothetical protein, conserved | location=LmxM.03:236375-237994(+) | length=1620 | sequence_SO=chromosome |	1620
LmxM.03.0680 | organism=Leishmania_mexicana_MHOM/GT/2001/U1103 | product=hypothetical protein | location=LmxM.03:247702-248562(+) | length=861 | sequence_SO=chromosome | mapping	861	795	321	474	89.18	LmxM.03.0680 | organism=Leishmania_mexicana_MHOM/GT/2001/U1103 | product=hypothetical protein | location=LmxM.03:247702-248562(+) | length=861 | sequence_SO=chromosome |	861
LmxM.03.0690 | organism=Leishmania_mexicana_MHOM/GT/2001/U1103 | product=hypothetical protein, conserved | location=LmxM.03:250685-256870(-) | length=6186 | sequence_SO=chromosome | mapping	6186	6309	337	5972	100.768	LmxM.03.0690 | organism=Leishmania_mexicana_MHOM/GT/2001/U1103 | product=hypothetical protein, conserved | location=LmxM.03:250685-256870(-) | length=6186 | sequence_SO=chromosome |	6186
LmxM.03.0700 | organism=Leishmania_mexicana_MHOM/GT/2001/U1103 | product=hypothetical protein, conserved | location=LmxM.03:258078-266666(-) | length=8589 | sequence_SO=chromosome | mapping	8589	8281	301	7980	94.8621	LmxM.03.0700 | organism=Leishmania_mexicana_MHOM/GT/2001/U1103 | product=hypothetical protein, conserved | location=LmxM.03:258078-266666(-) | length=8589 | sequence_SO=chromosome |	8589
LmxM.03.0710 | organism=Leishmania_mexicana_MHOM/GT/2001/U1103 | product=hypothetical protein, conserved | location=LmxM.03:267546-268292(-) | length=747 | sequence_SO=chromosome | mapping	747	745	337	408	97.0147	LmxM.03.0710 | organism=Leishmania_mexicana_MHOM/GT/2001/U1103 | product=hypothetical protein, conserved | location=LmxM.03:267546-268292(-) | length=747 | sequence_SO=chromosome |	747
LmxM.03.0720 | organism=Leishmania_mexicana_MHOM/GT/2001/U1103 | product=hypothetical protein, conserved | location=LmxM.03:268748-271483(-) | length=2736 | sequence_SO=chromosome | mapping	2736	2588	316	2272	92.644	LmxM.03.0720 | organism=Leishmania_mexicana_MHOM/GT/2001/U1103 | product=hypothetical protein, conserved | location=LmxM.03:268748-271483(-) | length=2736 | sequence_SO=chromosome |	2736
LmxM.03.0730 | organism=Leishmania_mexicana_MHOM/GT/2001/U1103 | product=hypothetical protein, conserved | location=LmxM.03:273300-274415(-) | length=1116 | sequence_SO=chromosome | mapping	1116	1161	343	818	101.275	LmxM.03.0730 | organism=Leishmania_mexicana_MHOM/GT/2001/U1103 | product=hypothetical protein, conserved | location=LmxM.03:273300-274415(-) | length=1116 | sequence_SO=chromosome |	1116
LmxM.03.0740 | organism=Leishmania_mexicana_MHOM/GT/2001/U1103 | product=cytochrome c oxidase copper chaperone, putative | location=LmxM.03:275280-275534(-) | length=255 | sequence_SO=chromosome | mapping	255	226	216	10	81.502	LmxM.03.0740 | organism=Leishmania_mexicana_MHOM/GT/2001/U1103 | product=cytochrome c oxidase copper chaperone, putative | location=LmxM.03:275280-275534(-) | length=255 | sequence_SO=chromosome |	255
LmxM.03.0750 | organism=Leishmania_mexicana_MHOM/GT/2001/U1103 | product=hypothetical protein, conserved | location=LmxM.03:276196-278304(-) | length=2109 | sequence_SO=chromosome | mapping	2109	2095	367	1728	97.844	LmxM.03.0750 | organism=Leishmania_mexicana_MHOM/GT/2001/U1103 | product=hypothetical protein, conserved | location=LmxM.03:276196-278304(-) | length=2109 | sequence_SO=chromosome |	2109
LmxM.03.0760 | organism=Leishmania_mexicana_MHOM/GT/2001/U1103 | product=hypothetical protein, conserved | location=LmxM.03:279121-280092(-) | length=972 | sequence_SO=chromosome | mapping	972	819	233	586	81.7613	LmxM.03.0760 | organism=Leishmania_mexicana_MHOM/GT/2001/U1103 | product=hypothetical protein, conserved | location=LmxM.03:279121-280092(-) | length=972 | sequence_SO=chromosome |	972
LmxM.03.0770 | organism=Leishmania_mexicana_MHOM/GT/2001/U1103 | product=unspecified product | location=LmxM.03:280836-282458(-) | length=1623 | sequence_SO=chromosome | mapping	1623	1588	288	1300	95.9784	LmxM.03.0770 | organism=Leishmania_mexicana_MHOM/GT/2001/U1103 | product=unspecified product | location=LmxM.03:280836-282458(-) | length=1623 | sequence_SO=chromosome |	1623
LmxM.03.0780 | organism=Leishmania_mexicana_MHOM/GT/2001/U1103 | product=serine/threonine-protein kinase, putative,protein kinase, putative | location=LmxM.03:283136-292288(-) | length=9153 | sequence_SO=chromosome | mapping	9153	8983	323	8660	96.9645	LmxM.03.0780 | organism=Leishmania_mexicana_MHOM/GT/2001/U1103 | product=serine/threonine-protein kinase, putative,protein kinase, putative | location=LmxM.03:283136-292288(-) | length=9153 | sequence_SO=chromosome |	9153
LmxM.03.0790 | organism=Leishmania_mexicana_MHOM/GT/2001/U1103 | product=hypothetical protein, conserved | location=LmxM.03:293922-295262(-) | length=1341 | sequence_SO=chromosome | mapping	1341	1217	337	880	88.7875	LmxM.03.0790 | organism=Leishmania_mexicana_MHOM/GT/2001/U1103 | product=hypothetical protein, conserved | location=LmxM.03:293922-295262(-) | length=1341 | sequence_SO=chromosome |	1341
LmxM.03.0800 | organism=Leishmania_mexicana_MHOM/GT/2001/U1103 | product=unspecified product | location=LmxM.03:296117-303451(-) | length=7335 | sequence_SO=chromosome | mapping	7335	7167	369	6798	96.5001	LmxM.03.0800 | organism=Leishmania_mexicana_MHOM/GT/2001/U1103 | product=unspecified product | location=LmxM.03:296117-303451(-) | length=7335 | sequence_SO=chromosome |	7335
LmxM.03.0810 | organism=Leishmania_mexicana_MHOM/GT/2001/U1103 | product=hypothetical protein | location=LmxM.03:304682-307918(-) | length=3237 | sequence_SO=chromosome | mapping	3237	2999	317	2682	91.123	LmxM.03.0810 | organism=Leishmania_mexicana_MHOM/GT/2001/U1103 | product=hypothetical protein | location=LmxM.03:304682-307918(-) | length=3237 | sequence_SO=chromosome |	3237
LmxM.03.0820 | organism=Leishmania_mexicana_MHOM/GT/2001/U1103 | product=hypothetical protein, conserved | location=LmxM.03:308561-317260(-) | length=8700 | sequence_SO=chromosome | mapping	8700	8583	301	8282	97.2294	LmxM.03.0820 | organism=Leishmania_mexicana_MHOM/GT/2001/U1103 | product=hypothetical protein, conserved | location=LmxM.03:308561-317260(-) | length=8700 | sequence_SO=chromosome |	8700
LmxM.03.0821 | organism=Leishmania_mexicana_MHOM/GT/2001/U1103 | product=aminoalcohol phosphotransferase, putative | location=LmxM.03:318292-320091(-) | length=1800 | sequence_SO=chromosome | mapping	1800	1817	267	1550	99.065	LmxM.03.0821 | organism=Leishmania_mexicana_MHOM/GT/2001/U1103 | product=aminoalcohol phosphotransferase, putative | location=LmxM.03:318292-320091(-) | length=1800 | sequence_SO=chromosome |	1800
LmxM.03.0830 | organism=Leishmania_mexicana_MHOM/GT/2001/U1103 | product=hypothetical protein, conserved | location=LmxM.03:320786-321811(-) | length=1026 | sequence_SO=chromosome | mapping	1026	981	311	670	93.2212	LmxM.03.0830 | organism=Leishmania_mexicana_MHOM/GT/2001/U1103 | product=hypothetical protein, conserved | location=LmxM.03:320786-321811(-) | length=1026 | sequence_SO=chromosome |	1026
LmxM.03.0840 | organism=Leishmania_mexicana_MHOM/GT/2001/U1103 | product=hypothetical protein, conserved | location=LmxM.03:323107-326034(-) | length=2928 | sequence_SO=chromosome | mapping	2928	3147	341	2806	106.097	LmxM.03.0840 | organism=Leishmania_mexicana_MHOM/GT/2001/U1103 | product=hypothetical protein, conserved | location=LmxM.03:323107-326034(-) | length=2928 | sequence_SO=chromosome |	2928
LmxM.03.0850 | organism=Leishmania_mexicana_MHOM/GT/2001/U1103 | product=hypothetical protein, conserved | location=LmxM.03:326878-333579(-) | length=6702 | sequence_SO=chromosome | mapping	6702	6668	352	6316	98.107	LmxM.03.0850 | organism=Leishmania_mexicana_MHOM/GT/2001/U1103 | product=hypothetical protein, conserved | location=LmxM.03:326878-333579(-) | length=6702 | sequence_SO=chromosome |	6702
LmxM.03.0860 | organism=Leishmania_mexicana_MHOM/GT/2001/U1103 | product=hypothetical protein, conserved | location=LmxM.03:334602-338858(-) | length=4257 | sequence_SO=chromosome | mapping	4257	4384	354	4030	101.391	LmxM.03.0860 | organism=Leishmania_mexicana_MHOM/GT/2001/U1103 | product=hypothetical protein, conserved | location=LmxM.03:334602-338858(-) | length=4257 | sequence_SO=chromosome |	4257
LmxM.03.0870 | organism=Leishmania_mexicana_MHOM/GT/2001/U1103 | product=hypothetical protein, conserved | location=LmxM.03:339981-343874(-) | length=3894 | sequence_SO=chromosome | mapping	3894	3709	441	3268	93.2979	LmxM.03.0870 | organism=Leishmania_mexicana_MHOM/GT/2001/U1103 | product=hypothetical protein, conserved | location=LmxM.03:339981-343874(-) | length=3894 | sequence_SO=chromosome |	3894
LmxM.03.0880 | organism=Leishmania_mexicana_MHOM/GT/2001/U1103 | product=hypothetical protein, conserved | location=LmxM.03:345036-350399(-) | length=5364 | sequence_SO=chromosome | mapping	5364	5247	369	4878	96.4183	LmxM.03.0880 | organism=Leishmania_mexicana_MHOM/GT/2001/U1103 | product=hypothetical protein, conserved | location=LmxM.03:345036-350399(-) | length=5364 | sequence_SO=chromosome |	5364
LmxM.03.0890 | organism=Leishmania_mexicana_MHOM/GT/2001/U1103 | product=hypothetical protein, conserved | location=LmxM.03:351836-353767(-) | length=1932 | sequence_SO=chromosome | mapping	1932	1826	292	1534	92.7148	LmxM.03.0890 | organism=Leishmania_mexicana_MHOM/GT/2001/U1103 | product=hypothetical protein, conserved | location=LmxM.03:351836-353767(-) | length=1932 | sequence_SO=chromosome |	1932
LmxM.03.0900 | organism=Leishmania_mexicana_MHOM/GT/2001/U1103 | product=peter pan protein, putative | location=LmxM.03:356227-357315(-) | length=1089 | sequence_SO=chromosome | mapping	1089	1011	289	722	90.8852	LmxM.03.0900 | organism=Leishmania_mexicana_MHOM/GT/2001/U1103 | product=peter pan protein, putative | location=LmxM.03:356227-357315(-) | length=1089 | sequence_SO=chromosome |	1089
LmxM.03.0910 | organism=Leishmania_mexicana_MHOM/GT/2001/U1103 | product=inorganic pyrophosphatase, putative | location=LmxM.03:358502-359293(-) | length=792 | sequence_SO=chromosome | mapping	792	733	321	412	89.774	LmxM.03.0910 | organism=Leishmania_mexicana_MHOM/GT/2001/U1103 | product=inorganic pyrophosphatase, putative | location=LmxM.03:358502-359293(-) | length=792 | sequence_SO=chromosome |	792
LmxM.03.0920 | organism=Leishmania_mexicana_MHOM/GT/2001/U1103 | product=hypothetical protein, conserved | location=LmxM.03:359965-360615(-) | length=651 | sequence_SO=chromosome | mapping	651	553	297	256	81.6651	LmxM.03.0920 | organism=Leishmania_mexicana_MHOM/GT/2001/U1103 | product=hypothetical protein, conserved | location=LmxM.03:359965-360615(-) | length=651 | sequence_SO=chromosome |	651
LmxM.03.0930 | organism=Leishmania_mexicana_MHOM/GT/2001/U1103 | product=hypothetical protein | location=LmxM.03:361289-363382(-) | length=2094 | sequence_SO=chromosome | mapping	2094	1729	205	1524	81.1242	LmxM.03.0930 | organism=Leishmania_mexicana_MHOM/GT/2001/U1103 | product=hypothetical protein | location=LmxM.03:361289-363382(-) | length=2094 | sequence_SO=chromosome |	2094
LmxM.03.0940 | organism=Leishmania_mexicana_MHOM/GT/2001/U1103 | product=hypothetical protein, conserved | location=LmxM.03:363987-364973(-) | length=987 | sequence_SO=chromosome | mapping	987	833	305	528	82.4195	LmxM.03.0940 | organism=Leishmania_mexicana_MHOM/GT/2001/U1103 | product=hypothetical protein, conserved | location=LmxM.03:363987-364973(-) | length=987 | sequence_SO=chromosome |	987
LmxM.03.0950 | organism=Leishmania_mexicana_MHOM/GT/2001/U1103 | product=hypothetical protein, conserved | location=LmxM.03:366363-368033(-) | length=1671 | sequence_SO=chromosome | mapping	1671	1507	307	1200	88.1861	LmxM.03.0950 | organism=Leishmania_mexicana_MHOM/GT/2001/U1103 | product=hypothetical protein, conserved | location=LmxM.03:366363-368033(-) | length=1671 | sequence_SO=chromosome |	1671
LmxM.03.0960 | organism=Leishmania_mexicana_MHOM/GT/2001/U1103 | product=hypothetical protein, conserved | location=LmxM.03:368923-369237(-) | length=315 | sequence_SO=chromosome | mapping	315	300	280	20	89.7587	LmxM.03.0960 | organism=Leishmania_mexicana_MHOM/GT/2001/U1103 | product=hypothetical protein, conserved | location=LmxM.03:368923-369237(-) | length=315 | sequence_SO=chromosome |	315
LmxM.03.0970 | organism=Leishmania_mexicana_MHOM/GT/2001/U1103 | product=hypothetical protein, conserved | location=LmxM.03:369739-370716(-) | length=978 | sequence_SO=chromosome | mapping	978	886	316	570	88.3262	LmxM.03.0970 | organism=Leishmania_mexicana_MHOM/GT/2001/U1103 | product=hypothetical protein, conserved | location=LmxM.03:369739-370716(-) | length=978 | sequence_SO=chromosome |	978
LmxM.03.0980 | organism=Leishmania_mexicana_MHOM/GT/2001/U1103 | product=elongation initiation factor 2 alpha subunit, putative | location=LmxM.03:371419-372660(-) | length=1242 | sequence_SO=chromosome | mapping	1242	1228	320	908	96.8961	LmxM.03.0980 | organism=Leishmania_mexicana_MHOM/GT/2001/U1103 | product=elongation initiation factor 2 alpha subunit, putative | location=LmxM.03:371419-372660(-) | length=1242 | sequence_SO=chromosome |	1242
LmxM.04.0010 | organism=Leishmania_mexicana_MHOM/GT/2001/U1103 | product=calcium-translocating P-type ATPase,organelle-type calcium ATPase | location=LmxM.04:4372-7413(+) | length=3042 | sequence_SO=chromosome | mapping	3042	3243	365	2878	104.926	LmxM.04.0010 | organism=Leishmania_mexicana_MHOM/GT/2001/U1103 | product=calcium-translocating P-type ATPase,organelle-type calcium ATPase | location=LmxM.04:4372-7413(+) | length=3042 | sequence_SO=chromosome |	3042
LmxM.04.0020 | organism=Leishmania_mexicana_MHOM/GT/2001/U1103 | product=pteridine transporter (truncated), putative | location=LmxM.04:8555-10207(+) | length=1653 | sequence_SO=chromosome | mapping	1651	1926	300	1626	115.162	LmxM.04.0020 | organism=Leishmania_mexicana_MHOM/GT/2001/U1103 | product=pteridine transporter (truncated), putative | location=LmxM.04:8555-10207(+) | length=1653 | sequence_SO=chromosome |	1653
LmxM.04.0030 | organism=Leishmania_mexicana_MHOM/GT/2001/U1103 | product=cAMP-specific phosphodiesterase, putative | location=LmxM.04:12456-14459(+) | length=2004 | sequence_SO=chromosome | mapping	2004	2220	396	1824	108.966	LmxM.04.0030 | organism=Leishmania_mexicana_MHOM/GT/2001/U1103 | product=cAMP-specific phosphodiesterase, putative | location=LmxM.04:12456-14459(+) | length=2004 | sequence_SO=chromosome |	2004
LmxM.04.0035 | organism=Leishmania_mexicana_MHOM/GT/2001/U1103 | product=hypothetical protein | location=LmxM.04:15451-15672(+) | length=222 | sequence_SO=chromosome | mapping	222	174	170	4	68.8243	LmxM.04.0035 | organism=Leishmania_mexicana_MHOM/GT/2001/U1103 | product=hypothetical protein | location=LmxM.04:15451-15672(+) | length=222 | sequence_SO=chromosome |	222
LmxM.04.0040 | organism=Leishmania_mexicana_MHOM/GT/2001/U1103 | product=hypothetical protein | location=LmxM.04:16200-17507(+) | length=1308 | sequence_SO=chromosome | mapping	1308	1556	390	1166	116.744	LmxM.04.0040 | organism=Leishmania_mexicana_MHOM/GT/2001/U1103 | product=hypothetical protein | location=LmxM.04:16200-17507(+) | length=1308 | sequence_SO=chromosome |	1308
LmxM.04.0045 | organism=Leishmania_mexicana_MHOM/GT/2001/U1103 | product=hypothetical protein, conserved | location=LmxM.04:21486-21989(+) | length=504 | sequence_SO=chromosome | mapping	504	544	382	162	104.077	LmxM.04.0045 | organism=Leishmania_mexicana_MHOM/GT/2001/U1103 | product=hypothetical protein, conserved | location=LmxM.04:21486-21989(+) | length=504 | sequence_SO=chromosome |	504
LmxM.04.0050 | organism=Leishmania_mexicana_MHOM/GT/2001/U1103 | product=hypothetical protein, conserved | location=LmxM.04:23094-24668(+) | length=1575 | sequence_SO=chromosome | mapping	1575	1778	402	1376	110.792	LmxM.04.0050 | organism=Leishmania_mexicana_MHOM/GT/2001/U1103 | product=hypothetical protein, conserved | location=LmxM.04:23094-24668(+) | length=1575 | sequence_SO=chromosome |	1575
LmxM.04.0060 | organism=Leishmania_mexicana_MHOM/GT/2001/U1103 | product=DNA topoisomerase type IB small subunit | location=LmxM.04:26736-27524(+) | length=789 | sequence_SO=chromosome | mapping	789	832	334	498	102.229	LmxM.04.0060 | organism=Leishmania_mexicana_MHOM/GT/2001/U1103 | product=DNA topoisomerase type IB small subunit | location=LmxM.04:26736-27524(+) | length=789 | sequence_SO=chromosome |	789
LmxM.04.0070 | organism=Leishmania_mexicana_MHOM/GT/2001/U1103 | product=hypothetical protein, conserved | location=LmxM.04:28478-29212(+) | length=735 | sequence_SO=chromosome | mapping	735	788	354	434	103.811	LmxM.04.0070 | organism=Leishmania_mexicana_MHOM/GT/2001/U1103 | product=hypothetical protein, conserved | location=LmxM.04:28478-29212(+) | length=735 | sequence_SO=chromosome |	735
LmxM.04.0080 | organism=Leishmania_mexicana_MHOM/GT/2001/U1103 | product=hypothetical protein, conserved | location=LmxM.04:29926-30402(+) | length=477 | sequence_SO=chromosome | mapping	477	491	333	158	98.7421	LmxM.04.0080 | organism=Leishmania_mexicana_MHOM/GT/2001/U1103 | product=hypothetical protein, conserved | location=LmxM.04:29926-30402(+) | length=477 | sequence_SO=chromosome |	477
LmxM.04.0090 | organism=Leishmania_mexicana_MHOM/GT/2001/U1103 | product=hypothetical protein, conserved | location=LmxM.04:31512-37049(+) | length=5538 | sequence_SO=chromosome | mapping	5538	6073	387	5686	108.132	LmxM.04.0090 | organism=Leishmania_mexicana_MHOM/GT/2001/U1103 | product=hypothetical protein, conserved | location=LmxM.04:31512-37049(+) | length=5538 | sequence_SO=chromosome |	5538
LmxM.04.0100 | organism=Leishmania_mexicana_MHOM/GT/2001/U1103 | product=hypothetical protein, conserved | location=LmxM.04:38373-40130(+) | length=1758 | sequence_SO=chromosome | mapping	1758	1834	314	1520	102.085	LmxM.04.0100 | organism=Leishmania_mexicana_MHOM/GT/2001/U1103 | product=hypothetical protein, conserved | location=LmxM.04:38373-40130(+) | length=1758 | sequence_SO=chromosome |	1758
LmxM.04.0110 | organism=Leishmania_mexicana_MHOM/GT/2001/U1103 | product=hypothetical protein, conserved | location=LmxM.04:41261-42304(+) | length=1044 | sequence_SO=chromosome | mapping	1044	1035	307	728	96.7261	LmxM.04.0110 | organism=Leishmania_mexicana_MHOM/GT/2001/U1103 | product=hypothetical protein, conserved | location=LmxM.04:41261-42304(+) | length=1044 | sequence_SO=chromosome |	1044
LmxM.04.0120 | organism=Leishmania_mexicana_MHOM/GT/2001/U1103 | product=exosome complex exonuclease RRP40, putative | location=LmxM.04:42960-43958(+) | length=999 | sequence_SO=chromosome | mapping	999	1069	349	720	104.532	LmxM.04.0120 | organism=Leishmania_mexicana_MHOM/GT/2001/U1103 | product=exosome complex exonuclease RRP40, putative | location=LmxM.04:42960-43958(+) | length=999 | sequence_SO=chromosome |	999
LmxM.04.0123 | organism=Leishmania_mexicana_MHOM/GT/2001/U1103 | product=hypothetical protein, conserved | location=LmxM.04:44934-45401(+) | length=468 | sequence_SO=chromosome | mapping	468	411	263	148	82.9594	LmxM.04.0123 | organism=Leishmania_mexicana_MHOM/GT/2001/U1103 | product=hypothetical protein, conserved | location=LmxM.04:44934-45401(+) | length=468 | sequence_SO=chromosome |	468
LmxM.04.0127 | organism=Leishmania_mexicana_MHOM/GT/2001/U1103 | product=hypothetical protein, conserved | location=LmxM.04:46491-47651(+) | length=1161 | sequence_SO=chromosome | mapping	1161	1250	306	944	105.271	LmxM.04.0127 | organism=Leishmania_mexicana_MHOM/GT/2001/U1103 | product=hypothetical protein, conserved | location=LmxM.04:46491-47651(+) | length=1161 | sequence_SO=chromosome |	1161
LmxM.04.0130 | organism=Leishmania_mexicana_MHOM/GT/2001/U1103 | product=unspecified product | location=LmxM.04:47882-49723(+) | length=1842 | sequence_SO=chromosome | mapping	1844	1872	222	1650	99.6971	LmxM.04.0130 | organism=Leishmania_mexicana_MHOM/GT/2001/U1103 | product=unspecified product | location=LmxM.04:47882-49723(+) | length=1842 | sequence_SO=chromosome |	1842
LmxM.04.0180 | organism=Leishmania_mexicana_MHOM/GT/2001/U1103 | product=surface antigen-like protein | location=LmxM.04:51998-53485(+) | length=1488 | sequence_SO=chromosome | mapping	1488	1436	316	1120	94.9409	LmxM.04.0180 | organism=Leishmania_mexicana_MHOM/GT/2001/U1103 | product=surface antigen-like protein | location=LmxM.04:51998-53485(+) | length=1488 | sequence_SO=chromosome |	1488
LmxM.04.0190 | organism=Leishmania_mexicana_MHOM/GT/2001/U1103 | product=surface antigen-like protein | location=LmxM.04:54369-56498(+) | length=2130 | sequence_SO=chromosome | mapping	2130	2332	298	2034	107.717	LmxM.04.0190 | organism=Leishmania_mexicana_MHOM/GT/2001/U1103 | product=surface antigen-like protein | location=LmxM.04:54369-56498(+) | length=2130 | sequence_SO=chromosome |	2130
LmxM.04.0200 | organism=Leishmania_mexicana_MHOM/GT/2001/U1103 | product=surface antigen-like protein | location=LmxM.04:57557-58105(+) | length=549 | sequence_SO=chromosome | mapping	549	489	261	228	85.969	LmxM.04.0200 | organism=Leishmania_mexicana_MHOM/GT/2001/U1103 | product=surface antigen-like protein | location=LmxM.04:57557-58105(+) | length=549 | sequence_SO=chromosome |	549
LmxM.04.0210 | organism=Leishmania_mexicana_MHOM/GT/2001/U1103 | product=surface antigen-like protein | location=LmxM.04:59501-60568(+) | length=1068 | sequence_SO=chromosome | mapping	1068	1114	314	800	100.899	LmxM.04.0210 | organism=Leishmania_mexicana_MHOM/GT/2001/U1103 | product=surface antigen-like protein | location=LmxM.04:59501-60568(+) | length=1068 | sequence_SO=chromosome |	1068
LmxM.04.0220 | organism=Leishmania_mexicana_MHOM/GT/2001/U1103 | product=hypothetical protein | location=LmxM.04:62893-63957(+) | length=1065 | sequence_SO=chromosome | mapping	1065	1080	328	752	98.4817	LmxM.04.0220 | organism=Leishmania_mexicana_MHOM/GT/2001/U1103 | product=hypothetical protein | location=LmxM.04:62893-63957(+) | length=1065 | sequence_SO=chromosome |	1065
LmxM.04.0230 | organism=Leishmania_mexicana_MHOM/GT/2001/U1103 | product=hypothetical protein, conserved | location=LmxM.04:65619-66398(+) | length=780 | sequence_SO=chromosome | mapping	780	764	324	440	94.7141	LmxM.04.0230 | organism=Leishmania_mexicana_MHOM/GT/2001/U1103 | product=hypothetical protein, conserved | location=LmxM.04:65619-66398(+) | length=780 | sequence_SO=chromosome |	780
LmxM.04.0240 | organism=Leishmania_mexicana_MHOM/GT/2001/U1103 | product=hypothetical protein, conserved | location=LmxM.04:67666-68538(+) | length=873 | sequence_SO=chromosome | mapping	873	796	248	548	88.5384	LmxM.04.0240 | organism=Leishmania_mexicana_MHOM/GT/2001/U1103 | product=hypothetical protein, conserved | location=LmxM.04:67666-68538(+) | length=873 | sequence_SO=chromosome |	873
LmxM.04.0250 | organism=Leishmania_mexicana_MHOM/GT/2001/U1103 | product=RNA pseudouridylate synthase-like protein | location=LmxM.04:70646-75013(+) | length=4368 | sequence_SO=chromosome | mapping	4368	4450	322	4128	100.33	LmxM.04.0250 | organism=Leishmania_mexicana_MHOM/GT/2001/U1103 | product=RNA pseudouridylate synthase-like protein | location=LmxM.04:70646-75013(+) | length=4368 | sequence_SO=chromosome |	4368
LmxM.04.0260 | organism=Leishmania_mexicana_MHOM/GT/2001/U1103 | product=hypothetical protein, conserved | location=LmxM.04:75687-76490(+) | length=804 | sequence_SO=chromosome | mapping	804	731	265	466	88.2923	LmxM.04.0260 | organism=Leishmania_mexicana_MHOM/GT/2001/U1103 | product=hypothetical protein, conserved | location=LmxM.04:75687-76490(+) | length=804 | sequence_SO=chromosome |	804
LmxM.04.0270 | organism=Leishmania_mexicana_MHOM/GT/2001/U1103 | product=hypothetical protein, conserved | location=LmxM.04:77162-78604(+) | length=1443 | sequence_SO=chromosome | mapping	1443	1351	283	1068	91.8247	LmxM.04.0270 | organism=Leishmania_mexicana_MHOM/GT/2001/U1103 | product=hypothetical protein, conserved | location=LmxM.04:77162-78604(+) | length=1443 | sequence_SO=chromosome |	1443
LmxM.04.0280 | organism=Leishmania_mexicana_MHOM/GT/2001/U1103 | product=adenosine monophosphate deaminase, putative,AMP deaminase, putative | location=LmxM.04:79204-85296(+) | length=6093 | sequence_SO=chromosome | mapping	6093	6412	384	6028	103.961	LmxM.04.0280 | organism=Leishmania_mexicana_MHOM/GT/2001/U1103 | product=adenosine monophosphate deaminase, putative,AMP deaminase, putative | location=LmxM.04:79204-85296(+) | length=6093 | sequence_SO=chromosome |	6093
LmxM.04.0290 | organism=Leishmania_mexicana_MHOM/GT/2001/U1103 | product=hypothetical protein, conserved | location=LmxM.04:86692-88047(+) | length=1356 | sequence_SO=chromosome | mapping	1356	1242	240	1002	89.1534	LmxM.04.0290 | organism=Leishmania_mexicana_MHOM/GT/2001/U1103 | product=hypothetical protein, conserved | location=LmxM.04:86692-88047(+) | length=1356 | sequence_SO=chromosome |	1356
LmxM.04.0300 | organism=Leishmania_mexicana_MHOM/GT/2001/U1103 | product=hypothetical protein, conserved | location=LmxM.04:89276-90058(+) | length=783 | sequence_SO=chromosome | mapping	783	674	228	446	84.1124	LmxM.04.0300 | organism=Leishmania_mexicana_MHOM/GT/2001/U1103 | product=hypothetical protein, conserved | location=LmxM.04:89276-90058(+) | length=783 | sequence_SO=chromosome |	783
LmxM.04.0310 | organism=Leishmania_mexicana_MHOM/GT/2001/U1103 | product=beta-fructofuranosidase, putative | location=LmxM.04:90670-92580(+) | length=1911 | sequence_SO=chromosome | mapping	1911	1934	360	1574	98.8394	LmxM.04.0310 | organism=Leishmania_mexicana_MHOM/GT/2001/U1103 | product=beta-fructofuranosidase, putative | location=LmxM.04:90670-92580(+) | length=1911 | sequence_SO=chromosome |	1911
LmxM.04.0320 | organism=Leishmania_mexicana_MHOM/GT/2001/U1103 | product=unspecified product | location=LmxM.04:94378-95577(+) | length=1200 | sequence_SO=chromosome | mapping	1200	1016	168	848	83.0183	LmxM.04.0320 | organism=Leishmania_mexicana_MHOM/GT/2001/U1103 | product=unspecified product | location=LmxM.04:94378-95577(+) | length=1200 | sequence_SO=chromosome |	1200
LmxM.04.0330 | organism=Leishmania_mexicana_MHOM/GT/2001/U1103 | product=mitochondrial exoribonuclease DSS-1, putative | location=LmxM.04:96821-99352(+) | length=2532 | sequence_SO=chromosome | mapping	2532	2684	284	2400	104.32	LmxM.04.0330 | organism=Leishmania_mexicana_MHOM/GT/2001/U1103 | product=mitochondrial exoribonuclease DSS-1, putative | location=LmxM.04:96821-99352(+) | length=2532 | sequence_SO=chromosome |	2532
LmxM.04.0340 | organism=Leishmania_mexicana_MHOM/GT/2001/U1103 | product=ADP-ribosylation factor, putative | location=LmxM.04:99958-100512(+) | length=555 | sequence_SO=chromosome | mapping	555	558	324	234	96.7802	LmxM.04.0340 | organism=Leishmania_mexicana_MHOM/GT/2001/U1103 | product=ADP-ribosylation factor, putative | location=LmxM.04:99958-100512(+) | length=555 | sequence_SO=chromosome |	555
LmxM.04.0350 | organism=Leishmania_mexicana_MHOM/GT/2001/U1103 | product=unspecified product | location=LmxM.04:102086-108481(+) | length=6396 | sequence_SO=chromosome | mapping	6396	6498	418	6080	100.102	LmxM.04.0350 | organism=Leishmania_mexicana_MHOM/GT/2001/U1103 | product=unspecified product | location=LmxM.04:102086-108481(+) | length=6396 | sequence_SO=chromosome |	6396
LmxM.04.0370 | organism=Leishmania_mexicana_MHOM/GT/2001/U1103 | product=hypothetical protein, conserved | location=LmxM.04:109547-110119(+) | length=573 | sequence_SO=chromosome | mapping	573	547	287	260	92.1291	LmxM.04.0370 | organism=Leishmania_mexicana_MHOM/GT/2001/U1103 | product=hypothetical protein, conserved | location=LmxM.04:109547-110119(+) | length=573 | sequence_SO=chromosome |	573
LmxM.04.0380 | organism=Leishmania_mexicana_MHOM/GT/2001/U1103 | product=hypothetical protein, conserved | location=LmxM.04:111198-112259(+) | length=1062 | sequence_SO=chromosome | mapping	1062	1060	328	732	97.1083	LmxM.04.0380 | organism=Leishmania_mexicana_MHOM/GT/2001/U1103 | product=hypothetical protein, conserved | location=LmxM.04:111198-112259(+) | length=1062 | sequence_SO=chromosome |	1062
LmxM.04.0390 | organism=Leishmania_mexicana_MHOM/GT/2001/U1103 | product=hypothetical protein | location=LmxM.04:120637-121350(-) | length=714 | sequence_SO=chromosome | mapping	714	761	363	398	103.37	LmxM.04.0390 | organism=Leishmania_mexicana_MHOM/GT/2001/U1103 | product=hypothetical protein | location=LmxM.04:120637-121350(-) | length=714 | sequence_SO=chromosome |	714
LmxM.04.0400 | organism=Leishmania_mexicana_MHOM/GT/2001/U1103 | product=anaphase promoting complex, subunit 10-like protein | location=LmxM.04:123807-124799(-) | length=993 | sequence_SO=chromosome | mapping	993	1087	353	734	106.738	LmxM.04.0400 | organism=Leishmania_mexicana_MHOM/GT/2001/U1103 | product=anaphase promoting complex, subunit 10-like protein | location=LmxM.04:123807-124799(-) | length=993 | sequence_SO=chromosome |	993
LmxM.04.0410 | organism=Leishmania_mexicana_MHOM/GT/2001/U1103 | product=hypothetical protein, conserved | location=LmxM.04:126711-129824(-) | length=3114 | sequence_SO=chromosome | mapping	3114	3097	341	2756	97.6718	LmxM.04.0410 | organism=Leishmania_mexicana_MHOM/GT/2001/U1103 | product=hypothetical protein, conserved | location=LmxM.04:126711-129824(-) | length=3114 | sequence_SO=chromosome |	3114
LmxM.04.0420 | organism=Leishmania_mexicana_MHOM/GT/2001/U1103 | product=hypothetical protein, conserved | location=LmxM.04:132047-133132(-) | length=1086 | sequence_SO=chromosome | mapping	1086	1037	235	802	93.2449	LmxM.04.0420 | organism=Leishmania_mexicana_MHOM/GT/2001/U1103 | product=hypothetical protein, conserved | location=LmxM.04:132047-133132(-) | length=1086 | sequence_SO=chromosome |	1086
LmxM.04.0430 | organism=Leishmania_mexicana_MHOM/GT/2001/U1103 | product=hypothetical protein, conserved | location=LmxM.04:134501-146953(-) | length=12453 | sequence_SO=chromosome | mapping	12450	13177	351	12826	104.548	LmxM.04.0430 | organism=Leishmania_mexicana_MHOM/GT/2001/U1103 | product=hypothetical protein, conserved | location=LmxM.04:134501-146953(-) | length=12453 | sequence_SO=chromosome |	12453
LmxM.04.0440 | organism=Leishmania_mexicana_MHOM/GT/2001/U1103 | product=serine/threonine protein kinase-like protein | location=LmxM.04:150178-154113(-) | length=3936 | sequence_SO=chromosome | mapping	3936	4263	353	3910	106.705	LmxM.04.0440 | organism=Leishmania_mexicana_MHOM/GT/2001/U1103 | product=serine/threonine protein kinase-like protein | location=LmxM.04:150178-154113(-) | length=3936 | sequence_SO=chromosome |	3936
LmxM.04.0450 | organism=Leishmania_mexicana_MHOM/GT/2001/U1103 | product=calpain-like cysteine peptidase, putative,cysteine peptidase, Clan CA, family C2, putative | location=LmxM.04:157065-159458(-) | length=2394 | sequence_SO=chromosome | mapping	2394	2571	329	2242	105.385	LmxM.04.0450 | organism=Leishmania_mexicana_MHOM/GT/2001/U1103 | product=calpain-like cysteine peptidase, putative,cysteine peptidase, Clan CA, family C2, putative | location=LmxM.04:157065-159458(-) | length=2394 | sequence_SO=chromosome |	2394
LmxM.04.0460 | organism=Leishmania_mexicana_MHOM/GT/2001/U1103 | product=adenylosuccinate lyase, putative (ADSL) | location=LmxM.04:163554-165008(-) | length=1455 | sequence_SO=chromosome | mapping	1455	1589	347	1242	107.389	LmxM.04.0460 | organism=Leishmania_mexicana_MHOM/GT/2001/U1103 | product=adenylosuccinate lyase, putative (ADSL) | location=LmxM.04:163554-165008(-) | length=1455 | sequence_SO=chromosome |	1455
LmxM.04.0465 | organism=Leishmania_mexicana_MHOM/GT/2001/U1103 | product=unspecified product | location=LmxM.04:165750-168320(-) | length=2571 | sequence_SO=chromosome | mapping	2571	2581	307	2274	98.3528	LmxM.04.0465 | organism=Leishmania_mexicana_MHOM/GT/2001/U1103 | product=unspecified product | location=LmxM.04:165750-168320(-) | length=2571 | sequence_SO=chromosome |	2571
LmxM.04.0470 | organism=Leishmania_mexicana_MHOM/GT/2001/U1103 | product=60S ribosomal protein L11 (L5, L16) | location=LmxM.04:169454-170020(-) | length=567 | sequence_SO=chromosome | mapping	567	534	288	246	90.8148	LmxM.04.0470 | organism=Leishmania_mexicana_MHOM/GT/2001/U1103 | product=60S ribosomal protein L11 (L5, L16) | location=LmxM.04:169454-170020(-) | length=567 | sequence_SO=chromosome |	567
LmxM.04.0480 | organism=Leishmania_mexicana_MHOM/GT/2001/U1103 | product=ADP-ribosylation factor, putative | location=LmxM.04:171029-171538(-) | length=510 | sequence_SO=chromosome | mapping	510	372	196	176	70.3902	LmxM.04.0480 | organism=Leishmania_mexicana_MHOM/GT/2001/U1103 | product=ADP-ribosylation factor, putative | location=LmxM.04:171029-171538(-) | length=510 | sequence_SO=chromosome |	510
LmxM.04.0490 | organism=Leishmania_mexicana_MHOM/GT/2001/U1103 | product=hypothetical protein, conserved | location=LmxM.04:173548-174522(-) | length=975 | sequence_SO=chromosome | mapping	975	948	254	694	95.0113	LmxM.04.0490 | organism=Leishmania_mexicana_MHOM/GT/2001/U1103 | product=hypothetical protein, conserved | location=LmxM.04:173548-174522(-) | length=975 | sequence_SO=chromosome |	975
LmxM.04.0500 | organism=Leishmania_mexicana_MHOM/GT/2001/U1103 | product=unspecified product | location=LmxM.04:175678-184668(-) | length=8991 | sequence_SO=chromosome | mapping	8990	9578	386	9192	104.985	LmxM.04.0500 | organism=Leishmania_mexicana_MHOM/GT/2001/U1103 | product=unspecified product | location=LmxM.04:175678-184668(-) | length=8991 | sequence_SO=chromosome |	8991
LmxM.04.0510 | organism=Leishmania_mexicana_MHOM/GT/2001/U1103 | product=unspecified product | location=LmxM.04:188103-192698(-) | length=4596 | sequence_SO=chromosome | mapping	4596	4889	381	4508	104.768	LmxM.04.0510 | organism=Leishmania_mexicana_MHOM/GT/2001/U1103 | product=unspecified product | location=LmxM.04:188103-192698(-) | length=4596 | sequence_SO=chromosome |	4596
LmxM.04.0520 | organism=Leishmania_mexicana_MHOM/GT/2001/U1103 | product=huntingtin interacting protein (HIP), putative | location=LmxM.04:193906-197082(-) | length=3177 | sequence_SO=chromosome | mapping	3177	3334	282	3052	103.45	LmxM.04.0520 | organism=Leishmania_mexicana_MHOM/GT/2001/U1103 | product=huntingtin interacting protein (HIP), putative | location=LmxM.04:193906-197082(-) | length=3177 | sequence_SO=chromosome |	3177
LmxM.04.0530 | organism=Leishmania_mexicana_MHOM/GT/2001/U1103 | product=unspecified product | location=LmxM.04:198803-199969(-) | length=1167 | sequence_SO=chromosome | mapping	1167	1127	289	838	94.4302	LmxM.04.0530 | organism=Leishmania_mexicana_MHOM/GT/2001/U1103 | product=unspecified product | location=LmxM.04:198803-199969(-) | length=1167 | sequence_SO=chromosome |	1167
LmxM.04.0540 | organism=Leishmania_mexicana_MHOM/GT/2001/U1103 | product=hypothetical protein, conserved | location=LmxM.04:202025-203779(-) | length=1755 | sequence_SO=chromosome | mapping	1755	1772	318	1454	99.2245	LmxM.04.0540 | organism=Leishmania_mexicana_MHOM/GT/2001/U1103 | product=hypothetical protein, conserved | location=LmxM.04:202025-203779(-) | length=1755 | sequence_SO=chromosome |	1755
LmxM.04.0550 | organism=Leishmania_mexicana_MHOM/GT/2001/U1103 | product=hypothetical protein, conserved | location=LmxM.04:205352-209992(-) | length=4641 | sequence_SO=chromosome | mapping	4641	4629	309	4320	98.3471	LmxM.04.0550 | organism=Leishmania_mexicana_MHOM/GT/2001/U1103 | product=hypothetical protein, conserved | location=LmxM.04:205352-209992(-) | length=4641 | sequence_SO=chromosome |	4641
LmxM.04.0560 | organism=Leishmania_mexicana_MHOM/GT/2001/U1103 | product=tyrosine phosphatase, putative | location=LmxM.04:213486-214364(-) | length=879 | sequence_SO=chromosome | mapping	879	849	311	538	94.2355	LmxM.04.0560 | organism=Leishmania_mexicana_MHOM/GT/2001/U1103 | product=tyrosine phosphatase, putative | location=LmxM.04:213486-214364(-) | length=879 | sequence_SO=chromosome |	879
LmxM.04.0570 | organism=Leishmania_mexicana_MHOM/GT/2001/U1103 | product=hypothetical protein, conserved | location=LmxM.04:214928-219511(-) | length=4584 | sequence_SO=chromosome | mapping	4584	4493	345	4148	96.5934	LmxM.04.0570 | organism=Leishmania_mexicana_MHOM/GT/2001/U1103 | product=hypothetical protein, conserved | location=LmxM.04:214928-219511(-) | length=4584 | sequence_SO=chromosome |	4584
LmxM.04.0580 | organism=Leishmania_mexicana_MHOM/GT/2001/U1103 | product=spermidine synthase, putative | location=LmxM.04:221584-222435(-) | length=852 | sequence_SO=chromosome | mapping	852	887	355	532	100.502	LmxM.04.0580 | organism=Leishmania_mexicana_MHOM/GT/2001/U1103 | product=spermidine synthase, putative | location=LmxM.04:221584-222435(-) | length=852 | sequence_SO=chromosome |	852
LmxM.04.0590 | organism=Leishmania_mexicana_MHOM/GT/2001/U1103 | product=hypothetical protein | location=LmxM.04:223968-224657(-) | length=690 | sequence_SO=chromosome | mapping	690	747	329	418	104.803	LmxM.04.0590 | organism=Leishmania_mexicana_MHOM/GT/2001/U1103 | product=hypothetical protein | location=LmxM.04:223968-224657(-) | length=690 | sequence_SO=chromosome |	690
LmxM.04.0600 | organism=Leishmania_mexicana_MHOM/GT/2001/U1103 | product=hypothetical protein | location=LmxM.04:225368-234382(-) | length=9015 | sequence_SO=chromosome | mapping	9015	9125	375	8750	99.7734	LmxM.04.0600 | organism=Leishmania_mexicana_MHOM/GT/2001/U1103 | product=hypothetical protein | location=LmxM.04:225368-234382(-) | length=9015 | sequence_SO=chromosome |	9015
LmxM.04.0610 | organism=Leishmania_mexicana_MHOM/GT/2001/U1103 | product=hypothetical protein, conserved | location=LmxM.04:236103-236606(-) | length=504 | sequence_SO=chromosome | mapping	504	480	302	178	90.8948	LmxM.04.0610 | organism=Leishmania_mexicana_MHOM/GT/2001/U1103 | product=hypothetical protein, conserved | location=LmxM.04:236103-236606(-) | length=504 | sequence_SO=chromosome |	504
LmxM.04.0620 | organism=Leishmania_mexicana_MHOM/GT/2001/U1103 | product=hypothetical protein | location=LmxM.04:237432-241259(-) | length=3828 | sequence_SO=chromosome | mapping	3828	3856	348	3508	99.2646	LmxM.04.0620 | organism=Leishmania_mexicana_MHOM/GT/2001/U1103 | product=hypothetical protein | location=LmxM.04:237432-241259(-) | length=3828 | sequence_SO=chromosome |	3828
LmxM.04.0625 | organism=Leishmania_mexicana_MHOM/GT/2001/U1103 | product=hypothetical protein | location=LmxM.04:244235-245251(-) | length=1017 | sequence_SO=chromosome | mapping	1017	1234	378	856	118.383	LmxM.04.0625 | organism=Leishmania_mexicana_MHOM/GT/2001/U1103 | product=hypothetical protein | location=LmxM.04:244235-245251(-) | length=1017 | sequence_SO=chromosome |	1017
LmxM.04.0630 | organism=Leishmania_mexicana_MHOM/GT/2001/U1103 | product=hypothetical protein, conserved | location=LmxM.04:245957-246553(-) | length=597 | sequence_SO=chromosome | mapping	597	674	412	262	108.528	LmxM.04.0630 | organism=Leishmania_mexicana_MHOM/GT/2001/U1103 | product=hypothetical protein, conserved | location=LmxM.04:245957-246553(-) | length=597 | sequence_SO=chromosome |	597
LmxM.04.0640 | organism=Leishmania_mexicana_MHOM/GT/2001/U1103 | product=hypothetical protein | location=LmxM.04:248085-249065(-) | length=981 | sequence_SO=chromosome | mapping	981	873	265	608	86.2385	LmxM.04.0640 | organism=Leishmania_mexicana_MHOM/GT/2001/U1103 | product=hypothetical protein | location=LmxM.04:248085-249065(-) | length=981 | sequence_SO=chromosome |	981
LmxM.04.0650 | organism=Leishmania_mexicana_MHOM/GT/2001/U1103 | product=serine-threonine protein kinase-like protein | location=LmxM.04:250615-254292(-) | length=3678 | sequence_SO=chromosome | mapping	3678	3338	224	3114	89.3445	LmxM.04.0650 | organism=Leishmania_mexicana_MHOM/GT/2001/U1103 | product=serine-threonine protein kinase-like protein | location=LmxM.04:250615-254292(-) | length=3678 | sequence_SO=chromosome |	3678
LmxM.04.0660 | organism=Leishmania_mexicana_MHOM/GT/2001/U1103 | product=unspecified product | location=LmxM.04:255192-255638(-) | length=447 | sequence_SO=chromosome | mapping	447	415	281	134	89.2103	LmxM.04.0660 | organism=Leishmania_mexicana_MHOM/GT/2001/U1103 | product=unspecified product | location=LmxM.04:255192-255638(-) | length=447 | sequence_SO=chromosome |	447
LmxM.04.0670 | organism=Leishmania_mexicana_MHOM/GT/2001/U1103 | product=hypothetical protein, conserved | location=LmxM.04:257295-257753(-) | length=459 | sequence_SO=chromosome | mapping	459	439	289	150	92.4553	LmxM.04.0670 | organism=Leishmania_mexicana_MHOM/GT/2001/U1103 | product=hypothetical protein, conserved | location=LmxM.04:257295-257753(-) | length=459 | sequence_SO=chromosome |	459
LmxM.04.0680 | organism=Leishmania_mexicana_MHOM/GT/2001/U1103 | product=ubiquitin-conjugating enzyme E2, putative | location=LmxM.04:258996-259442(-) | length=447 | sequence_SO=chromosome | mapping	447	442	302	140	94.4609	LmxM.04.0680 | organism=Leishmania_mexicana_MHOM/GT/2001/U1103 | product=ubiquitin-conjugating enzyme E2, putative | location=LmxM.04:258996-259442(-) | length=447 | sequence_SO=chromosome |	447
LmxM.04.0690 | organism=Leishmania_mexicana_MHOM/GT/2001/U1103 | product=hypothetical protein | location=LmxM.04:261372-263612(-) | length=2241 | sequence_SO=chromosome | mapping	2241	2307	299	2008	100.861	LmxM.04.0690 | organism=Leishmania_mexicana_MHOM/GT/2001/U1103 | product=hypothetical protein | location=LmxM.04:261372-263612(-) | length=2241 | sequence_SO=chromosome |	2241
LmxM.04.0700 | organism=Leishmania_mexicana_MHOM/GT/2001/U1103 | product=hypothetical protein, conserved | location=LmxM.04:264710-267940(-) | length=3231 | sequence_SO=chromosome | mapping	3231	3371	333	3038	102.305	LmxM.04.0700 | organism=Leishmania_mexicana_MHOM/GT/2001/U1103 | product=hypothetical protein, conserved | location=LmxM.04:264710-267940(-) | length=3231 | sequence_SO=chromosome |	3231
LmxM.04.0710 | organism=Leishmania_mexicana_MHOM/GT/2001/U1103 | product=hypothetical protein, conserved | location=LmxM.04:268921-271305(-) | length=2385 | sequence_SO=chromosome | mapping	2385	2402	312	2090	99.0289	LmxM.04.0710 | organism=Leishmania_mexicana_MHOM/GT/2001/U1103 | product=hypothetical protein, conserved | location=LmxM.04:268921-271305(-) | length=2385 | sequence_SO=chromosome |	2385
LmxM.04.0720 | organism=Leishmania_mexicana_MHOM/GT/2001/U1103 | product=hypothetical protein | location=LmxM.04:273862-275883(-) | length=2022 | sequence_SO=chromosome | mapping	2022	1921	279	1642	93.4268	LmxM.04.0720 | organism=Leishmania_mexicana_MHOM/GT/2001/U1103 | product=hypothetical protein | location=LmxM.04:273862-275883(-) | length=2022 | sequence_SO=chromosome |	2022
LmxM.04.0730 | organism=Leishmania_mexicana_MHOM/GT/2001/U1103 | product=unspecified product | location=LmxM.04:276974-278896(-) | length=1923 | sequence_SO=chromosome | mapping	1923	1963	271	1692	99.9558	LmxM.04.0730 | organism=Leishmania_mexicana_MHOM/GT/2001/U1103 | product=unspecified product | location=LmxM.04:276974-278896(-) | length=1923 | sequence_SO=chromosome |	1923
LmxM.04.0740 | organism=Leishmania_mexicana_MHOM/GT/2001/U1103 | product=hypothetical protein, conserved | location=LmxM.04:279645-282062(-) | length=2418 | sequence_SO=chromosome | mapping	2418	2350	290	2060	95.3234	LmxM.04.0740 | organism=Leishmania_mexicana_MHOM/GT/2001/U1103 | product=hypothetical protein, conserved | location=LmxM.04:279645-282062(-) | length=2418 | sequence_SO=chromosome |	2418
LmxM.04.0750 | organism=Leishmania_mexicana_MHOM/GT/2001/U1103 | product=60S ribosomal protein L10, putative | location=LmxM.04:282968-283609(-) | length=642 | sequence_SO=chromosome | mapping	642	572	280	292	86.0732	LmxM.04.0750 | organism=Leishmania_mexicana_MHOM/GT/2001/U1103 | product=60S ribosomal protein L10, putative | location=LmxM.04:282968-283609(-) | length=642 | sequence_SO=chromosome |	642
LmxM.04.0760 | organism=Leishmania_mexicana_MHOM/GT/2001/U1103 | product=unspecified product | location=LmxM.04:284694-285533(-) | length=840 | sequence_SO=chromosome | mapping	840	937	349	588	107.526	LmxM.04.0760 | organism=Leishmania_mexicana_MHOM/GT/2001/U1103 | product=unspecified product | location=LmxM.04:284694-285533(-) | length=840 | sequence_SO=chromosome |	840
LmxM.04.0770 | organism=Leishmania_mexicana_MHOM/GT/2001/U1103 | product=unspecified product | location=LmxM.04:286649-287167(-) | length=519 | sequence_SO=chromosome | mapping	519	329	209	120	61.4605	LmxM.04.0770 | organism=Leishmania_mexicana_MHOM/GT/2001/U1103 | product=unspecified product | location=LmxM.04:286649-287167(-) | length=519 | sequence_SO=chromosome |	519
LmxM.04.0780 | organism=Leishmania_mexicana_MHOM/GT/2001/U1103 | product=heat shock protein, putative | location=LmxM.04:287941-289416(-) | length=1476 | sequence_SO=chromosome | mapping	1479	1528	318	1210	100.799	LmxM.04.0780 | organism=Leishmania_mexicana_MHOM/GT/2001/U1103 | product=heat shock protein, putative | location=LmxM.04:287941-289416(-) | length=1476 | sequence_SO=chromosome |	1476
LmxM.04.0790 | organism=Leishmania_mexicana_MHOM/GT/2001/U1103 | product=hypothetical protein, conserved | location=LmxM.04:290731-294243(-) | length=3513 | sequence_SO=chromosome | mapping	3513	3558	304	3254	99.4799	LmxM.04.0790 | organism=Leishmania_mexicana_MHOM/GT/2001/U1103 | product=hypothetical protein, conserved | location=LmxM.04:290731-294243(-) | length=3513 | sequence_SO=chromosome |	3513
LmxM.04.0800 | organism=Leishmania_mexicana_MHOM/GT/2001/U1103 | product=unspecified product | location=LmxM.04:295613-296530(-) | length=918 | sequence_SO=chromosome | mapping	918	858	294	564	91.2625	LmxM.04.0800 | organism=Leishmania_mexicana_MHOM/GT/2001/U1103 | product=unspecified product | location=LmxM.04:295613-296530(-) | length=918 | sequence_SO=chromosome |	918
LmxM.04.0810 | organism=Leishmania_mexicana_MHOM/GT/2001/U1103 | product=hypothetical protein, conserved | location=LmxM.04:297665-299680(-) | length=2016 | sequence_SO=chromosome | mapping	2016	2009	285	1724	98.1691	LmxM.04.0810 | organism=Leishmania_mexicana_MHOM/GT/2001/U1103 | product=hypothetical protein, conserved | location=LmxM.04:297665-299680(-) | length=2016 | sequence_SO=chromosome |	2016
LmxM.04.0820 | organism=Leishmania_mexicana_MHOM/GT/2001/U1103 | product=unspecified product | location=LmxM.04:300406-301611(-) | length=1206 | sequence_SO=chromosome | mapping	1206	1197	249	948	97.7595	LmxM.04.0820 | organism=Leishmania_mexicana_MHOM/GT/2001/U1103 | product=unspecified product | location=LmxM.04:300406-301611(-) | length=1206 | sequence_SO=chromosome |	1206
LmxM.04.0830 | organism=Leishmania_mexicana_MHOM/GT/2001/U1103 | product=hypothetical protein, conserved | location=LmxM.04:302616-306347(-) | length=3732 | sequence_SO=chromosome | mapping	3732	3722	368	3354	98.3355	LmxM.04.0830 | organism=Leishmania_mexicana_MHOM/GT/2001/U1103 | product=hypothetical protein, conserved | location=LmxM.04:302616-306347(-) | length=3732 | sequence_SO=chromosome |	3732
LmxM.04.0840 | organism=Leishmania_mexicana_MHOM/GT/2001/U1103 | product=tyrosine phospatase-like protein | location=LmxM.04:307853-310462(-) | length=2610 | sequence_SO=chromosome | mapping	2610	2498	358	2140	93.887	LmxM.04.0840 | organism=Leishmania_mexicana_MHOM/GT/2001/U1103 | product=tyrosine phospatase-like protein | location=LmxM.04:307853-310462(-) | length=2610 | sequence_SO=chromosome |	2610
LmxM.04.0850 | organism=Leishmania_mexicana_MHOM/GT/2001/U1103 | product=rhomboid-like protein,serine peptidase, Clan S-, family S54, putative | location=LmxM.04:311935-313017(-) | length=1083 | sequence_SO=chromosome | mapping	1083	1076	228	848	96.9215	LmxM.04.0850 | organism=Leishmania_mexicana_MHOM/GT/2001/U1103 | product=rhomboid-like protein,serine peptidase, Clan S-, family S54, putative | location=LmxM.04:311935-313017(-) | length=1083 | sequence_SO=chromosome |	1083
LmxM.04.0860 | organism=Leishmania_mexicana_MHOM/GT/2001/U1103 | product=unspecified product | location=LmxM.04:313854-315029(-) | length=1176 | sequence_SO=chromosome | mapping	1178	1085	281	804	89.0349	LmxM.04.0860 | organism=Leishmania_mexicana_MHOM/GT/2001/U1103 | product=unspecified product | location=LmxM.04:313854-315029(-) | length=1176 | sequence_SO=chromosome |	1176
LmxM.04.0870 | organism=Leishmania_mexicana_MHOM/GT/2001/U1103 | product=hypothetical protein | location=LmxM.04:317150-320731(-) | length=3582 | sequence_SO=chromosome | mapping	3582	3606	406	3200	99.1452	LmxM.04.0870 | organism=Leishmania_mexicana_MHOM/GT/2001/U1103 | product=hypothetical protein | location=LmxM.04:317150-320731(-) | length=3582 | sequence_SO=chromosome |	3582
LmxM.04.0890 | organism=Leishmania_mexicana_MHOM/GT/2001/U1103 | product=hypothetical protein, conserved | location=LmxM.04:323104-326811(-) | length=3708 | sequence_SO=chromosome | mapping	3708	3715	261	3454	98.5798	LmxM.04.0890 | organism=Leishmania_mexicana_MHOM/GT/2001/U1103 | product=hypothetical protein, conserved | location=LmxM.04:323104-326811(-) | length=3708 | sequence_SO=chromosome |	3708
LmxM.04.0910 | organism=Leishmania_mexicana_MHOM/GT/2001/U1103 | product=hypothetical protein, conserved | location=LmxM.04:329607-330194(-) | length=588 | sequence_SO=chromosome | mapping	588	594	348	246	96.6497	LmxM.04.0910 | organism=Leishmania_mexicana_MHOM/GT/2001/U1103 | product=hypothetical protein, conserved | location=LmxM.04:329607-330194(-) | length=588 | sequence_SO=chromosome |	588
LmxM.04.0920 | organism=Leishmania_mexicana_MHOM/GT/2001/U1103 | product=hypothetical protein | location=LmxM.04:331667-333409(-) | length=1743 | sequence_SO=chromosome | mapping	1743	1678	290	1388	94.9552	LmxM.04.0920 | organism=Leishmania_mexicana_MHOM/GT/2001/U1103 | product=hypothetical protein | location=LmxM.04:331667-333409(-) | length=1743 | sequence_SO=chromosome |	1743
LmxM.04.0930 | organism=Leishmania_mexicana_MHOM/GT/2001/U1103 | product=unspecified product | location=LmxM.04:336013-336459(-) | length=447 | sequence_SO=chromosome | mapping	447	296	198	98	62.4206	LmxM.04.0930 | organism=Leishmania_mexicana_MHOM/GT/2001/U1103 | product=unspecified product | location=LmxM.04:336013-336459(-) | length=447 | sequence_SO=chromosome |	447
LmxM.04.0940 | organism=Leishmania_mexicana_MHOM/GT/2001/U1103 | product=unspecified product | location=LmxM.04:338321-339802(-) | length=1482 | sequence_SO=chromosome | mapping	1482	1291	231	1060	85.1653	LmxM.04.0940 | organism=Leishmania_mexicana_MHOM/GT/2001/U1103 | product=unspecified product | location=LmxM.04:338321-339802(-) | length=1482 | sequence_SO=chromosome |	1482
LmxM.04.0950 | organism=Leishmania_mexicana_MHOM/GT/2001/U1103 | product=unspecified product | location=LmxM.04:340919-341560(-) | length=642 | sequence_SO=chromosome | mapping	642	577	309	268	87.0623	LmxM.04.0950 | organism=Leishmania_mexicana_MHOM/GT/2001/U1103 | product=unspecified product | location=LmxM.04:340919-341560(-) | length=642 | sequence_SO=chromosome |	642
LmxM.04.0960 | organism=Leishmania_mexicana_MHOM/GT/2001/U1103 | product=adenylate kinase, putative | location=LmxM.04:342437-343060(-) | length=624 | sequence_SO=chromosome | mapping	624	601	261	340	93.5577	LmxM.04.0960 | organism=Leishmania_mexicana_MHOM/GT/2001/U1103 | product=adenylate kinase, putative | location=LmxM.04:342437-343060(-) | length=624 | sequence_SO=chromosome |	624
LmxM.04.0970 | organism=Leishmania_mexicana_MHOM/GT/2001/U1103 | product=hypothetical protein, conserved | location=LmxM.04:343729-345180(-) | length=1452 | sequence_SO=chromosome | mapping	1452	1253	235	1018	84.6784	LmxM.04.0970 | organism=Leishmania_mexicana_MHOM/GT/2001/U1103 | product=hypothetical protein, conserved | location=LmxM.04:343729-345180(-) | length=1452 | sequence_SO=chromosome |	1452
LmxM.04.0975 | organism=Leishmania_mexicana_MHOM/GT/2001/U1103 | product=hypothetical protein | location=LmxM.04:345964-347364(-) | length=1401 | sequence_SO=chromosome | mapping	1401	1339	279	1060	93.7145	LmxM.04.0975 | organism=Leishmania_mexicana_MHOM/GT/2001/U1103 | product=hypothetical protein | location=LmxM.04:345964-347364(-) | length=1401 | sequence_SO=chromosome |	1401
LmxM.04.0980 | organism=Leishmania_mexicana_MHOM/GT/2001/U1103 | product=hypothetical protein, conserved | location=LmxM.04:347697-351365(-) | length=3669 | sequence_SO=chromosome | mapping	3669	3562	320	3242	95.5936	LmxM.04.0980 | organism=Leishmania_mexicana_MHOM/GT/2001/U1103 | product=hypothetical protein, conserved | location=LmxM.04:347697-351365(-) | length=3669 | sequence_SO=chromosome |	3669
LmxM.04.0990 | organism=Leishmania_mexicana_MHOM/GT/2001/U1103 | product=hypothetical protein, conserved | location=LmxM.04:352061-352939(-) | length=879 | sequence_SO=chromosome | mapping	879	870	332	538	96.5313	LmxM.04.0990 | organism=Leishmania_mexicana_MHOM/GT/2001/U1103 | product=hypothetical protein, conserved | location=LmxM.04:352061-352939(-) | length=879 | sequence_SO=chromosome |	879
LmxM.04.1000 | organism=Leishmania_mexicana_MHOM/GT/2001/U1103 | product=chloride channel protein, putative | location=LmxM.04:353933-357340(-) | length=3408 | sequence_SO=chromosome | mapping	3408	3357	371	2986	96.9357	LmxM.04.1000 | organism=Leishmania_mexicana_MHOM/GT/2001/U1103 | product=chloride channel protein, putative | location=LmxM.04:353933-357340(-) | length=3408 | sequence_SO=chromosome |	3408
LmxM.04.1010 | organism=Leishmania_mexicana_MHOM/GT/2001/U1103 | product=hypothetical protein, conserved | location=LmxM.04:358939-359457(-) | length=519 | sequence_SO=chromosome | mapping	519	503	317	186	93.0501	LmxM.04.1010 | organism=Leishmania_mexicana_MHOM/GT/2001/U1103 | product=hypothetical protein, conserved | location=LmxM.04:358939-359457(-) | length=519 | sequence_SO=chromosome |	519
LmxM.04.1030 | organism=Leishmania_mexicana_MHOM/GT/2001/U1103 | product=unspecified product | location=LmxM.04:360907-361491(-) | length=585 | sequence_SO=chromosome | mapping	585	480	240	240	78.6889	LmxM.04.1030 | organism=Leishmania_mexicana_MHOM/GT/2001/U1103 | product=unspecified product | location=LmxM.04:360907-361491(-) | length=585 | sequence_SO=chromosome |	585
LmxM.04.1040 | organism=Leishmania_mexicana_MHOM/GT/2001/U1103 | product=unspecified product | location=LmxM.04:363393-364359(-) | length=967 | sequence_SO=chromosome | mapping	967	981	341	640	99.1977	LmxM.04.1040 | organism=Leishmania_mexicana_MHOM/GT/2001/U1103 | product=unspecified product | location=LmxM.04:363393-364359(-) | length=967 | sequence_SO=chromosome |	966
LmxM.04.1050 | organism=Leishmania_mexicana_MHOM/GT/2001/U1103 | product=acyltransferase-like protein, copy 2 | location=LmxM.04:366347-367270(-) | length=924 | sequence_SO=chromosome | mapping	924	930	344	586	98.0119	LmxM.04.1050 | organism=Leishmania_mexicana_MHOM/GT/2001/U1103 | product=acyltransferase-like protein, copy 2 | location=LmxM.04:366347-367270(-) | length=924 | sequence_SO=chromosome |	924
LmxM.04.1060 | organism=Leishmania_mexicana_MHOM/GT/2001/U1103 | product=hypothetical protein | location=LmxM.04:368517-369947(-) | length=1431 | sequence_SO=chromosome | mapping	1431	1480	338	1142	100.976	LmxM.04.1060 | organism=Leishmania_mexicana_MHOM/GT/2001/U1103 | product=hypothetical protein | location=LmxM.04:368517-369947(-) | length=1431 | sequence_SO=chromosome |	1431
LmxM.04.1070 | organism=Leishmania_mexicana_MHOM/GT/2001/U1103 | product=hypothetical protein, conserved | location=LmxM.04:370434-370823(-) | length=390 | sequence_SO=chromosome | mapping	390	389	331	58	93.1564	LmxM.04.1070 | organism=Leishmania_mexicana_MHOM/GT/2001/U1103 | product=hypothetical protein, conserved | location=LmxM.04:370434-370823(-) | length=390 | sequence_SO=chromosome |	390
LmxM.04.1080 | organism=Leishmania_mexicana_MHOM/GT/2001/U1103 | product=hypothetical protein, conserved | location=LmxM.04:371656-374307(-) | length=2652 | sequence_SO=chromosome | mapping	2655	2572	264	2308	95.4468	LmxM.04.1080 | organism=Leishmania_mexicana_MHOM/GT/2001/U1103 | product=hypothetical protein, conserved | location=LmxM.04:371656-374307(-) | length=2652 | sequence_SO=chromosome |	2652
LmxM.04.1090 | organism=Leishmania_mexicana_MHOM/GT/2001/U1103 | product=hypothetical protein, conserved | location=LmxM.04:375044-378949(-) | length=3906 | sequence_SO=chromosome | mapping	3906	4066	374	3692	102.611	LmxM.04.1090 | organism=Leishmania_mexicana_MHOM/GT/2001/U1103 | product=hypothetical protein, conserved | location=LmxM.04:375044-378949(-) | length=3906 | sequence_SO=chromosome |	3906
LmxM.04.1100 | organism=Leishmania_mexicana_MHOM/GT/2001/U1103 | product=unspecified product | location=LmxM.04:380972-381301(-) | length=330 | sequence_SO=chromosome | mapping	330	319	301	18	90.9455	LmxM.04.1100 | organism=Leishmania_mexicana_MHOM/GT/2001/U1103 | product=unspecified product | location=LmxM.04:380972-381301(-) | length=330 | sequence_SO=chromosome |	330
LmxM.04.1110 | organism=Leishmania_mexicana_MHOM/GT/2001/U1103 | product=proton motive ATPase, putative | location=LmxM.04:381878-384610(-) | length=2733 | sequence_SO=chromosome | mapping	2733	2840	294	2546	102.363	LmxM.04.1110 | organism=Leishmania_mexicana_MHOM/GT/2001/U1103 | product=proton motive ATPase, putative | location=LmxM.04:381878-384610(-) | length=2733 | sequence_SO=chromosome |	2733
LmxM.04.1120 | organism=Leishmania_mexicana_MHOM/GT/2001/U1103 | product=unspecified product | location=LmxM.04:386772-388961(-) | length=2190 | sequence_SO=chromosome | mapping	2190	2215	333	1882	99.4904	LmxM.04.1120 | organism=Leishmania_mexicana_MHOM/GT/2001/U1103 | product=unspecified product | location=LmxM.04:386772-388961(-) | length=2190 | sequence_SO=chromosome |	2190
LmxM.04.1130 | organism=Leishmania_mexicana_MHOM/GT/2001/U1103 | product=cytochrome c oxidase assembly factor, putative | location=LmxM.04:389832-390722(-) | length=891 | sequence_SO=chromosome | mapping	891	841	317	524	91.7295	LmxM.04.1130 | organism=Leishmania_mexicana_MHOM/GT/2001/U1103 | product=cytochrome c oxidase assembly factor, putative | location=LmxM.04:389832-390722(-) | length=891 | sequence_SO=chromosome |	891
LmxM.04.1140 | organism=Leishmania_mexicana_MHOM/GT/2001/U1103 | product=hypothetical protein | location=LmxM.04:391548-392621(-) | length=1074 | sequence_SO=chromosome | mapping	1070	1036	318	718	92.2142	LmxM.04.1140 | organism=Leishmania_mexicana_MHOM/GT/2001/U1103 | product=hypothetical protein | location=LmxM.04:391548-392621(-) | length=1074 | sequence_SO=chromosome |	1074
LmxM.04.1150 | organism=Leishmania_mexicana_MHOM/GT/2001/U1103 | product=hypothetical protein, conserved | location=LmxM.04:393101-393607(-) | length=507 | sequence_SO=chromosome | mapping	507	532	358	174	101.329	LmxM.04.1150 | organism=Leishmania_mexicana_MHOM/GT/2001/U1103 | product=hypothetical protein, conserved | location=LmxM.04:393101-393607(-) | length=507 | sequence_SO=chromosome |	507
LmxM.04.1160 | organism=Leishmania_mexicana_MHOM/GT/2001/U1103 | product=fructose-1,6-bisphosphatase, cytosolic, putative | location=LmxM.04:395875-396837(-) | length=963 | sequence_SO=chromosome | mapping	963	1077	325	752	109.147	LmxM.04.1160 | organism=Leishmania_mexicana_MHOM/GT/2001/U1103 | product=fructose-1,6-bisphosphatase, cytosolic, putative | location=LmxM.04:395875-396837(-) | length=963 | sequence_SO=chromosome |	963
LmxM.04.1165 | organism=Leishmania_mexicana_MHOM/GT/2001/U1103 | product=unspecified product | location=LmxM.04:397738-398965(-) | length=1228 | sequence_SO=chromosome | mapping	1228	1276	362	914	101.501	LmxM.04.1165 | organism=Leishmania_mexicana_MHOM/GT/2001/U1103 | product=unspecified product | location=LmxM.04:397738-398965(-) | length=1228 | sequence_SO=chromosome |	1227
LmxM.04.1170 | organism=Leishmania_mexicana_MHOM/GT/2001/U1103 | product=RNA-binding protein, putative (DRBD3) | location=LmxM.04:406901-407806(-) | length=906 | sequence_SO=chromosome | mapping	906	937	377	560	100.677	LmxM.04.1170 | organism=Leishmania_mexicana_MHOM/GT/2001/U1103 | product=RNA-binding protein, putative (DRBD3) | location=LmxM.04:406901-407806(-) | length=906 | sequence_SO=chromosome |	906
LmxM.04.1180 | organism=Leishmania_mexicana_MHOM/GT/2001/U1103 | product=hypothetical protein, conserved | location=LmxM.04:410655-417752(-) | length=7098 | sequence_SO=chromosome | mapping	7098	7303	401	6902	101.625	LmxM.04.1180 | organism=Leishmania_mexicana_MHOM/GT/2001/U1103 | product=hypothetical protein, conserved | location=LmxM.04:410655-417752(-) | length=7098 | sequence_SO=chromosome |	7098
LmxM.04.1190 | organism=Leishmania_mexicana_MHOM/GT/2001/U1103 | product=tRNA nucleotidyltransferase, putative | location=LmxM.04:419096-420667(-) | length=1572 | sequence_SO=chromosome | mapping	1572	1834	364	1470	114.732	LmxM.04.1190 | organism=Leishmania_mexicana_MHOM/GT/2001/U1103 | product=tRNA nucleotidyltransferase, putative | location=LmxM.04:419096-420667(-) | length=1572 | sequence_SO=chromosome |	1572
LmxM.04.1200 | organism=Leishmania_mexicana_MHOM/GT/2001/U1103 | product=hypothetical protein, conserved | location=LmxM.04:421458-422021(-) | length=564 | sequence_SO=chromosome | mapping	564	605	363	242	104.163	LmxM.04.1200 | organism=Leishmania_mexicana_MHOM/GT/2001/U1103 | product=hypothetical protein, conserved | location=LmxM.04:421458-422021(-) | length=564 | sequence_SO=chromosome |	564
LmxM.04.1210 | organism=Leishmania_mexicana_MHOM/GT/2001/U1103 | product=casein kinase I, putative | location=LmxM.04:426827-427933(-) | length=1107 | sequence_SO=chromosome | mapping	1107	1097	273	824	96.916	LmxM.04.1210 | organism=Leishmania_mexicana_MHOM/GT/2001/U1103 | product=casein kinase I, putative | location=LmxM.04:426827-427933(-) | length=1107 | sequence_SO=chromosome |	1107
LmxM.04.1220 | organism=Leishmania_mexicana_MHOM/GT/2001/U1103 | product=hypothetical protein, conserved | location=LmxM.04:428918-432064(-) | length=3147 | sequence_SO=chromosome | mapping	3147	3055	353	2702	95.7512	LmxM.04.1220 | organism=Leishmania_mexicana_MHOM/GT/2001/U1103 | product=hypothetical protein, conserved | location=LmxM.04:428918-432064(-) | length=3147 | sequence_SO=chromosome |	3147
LmxM.04.1230 | organism=Leishmania_mexicana_MHOM/GT/2001/U1103 | product=actin | location=LmxM.04:433272-434402(-) | length=1131 | sequence_SO=chromosome | mapping	1131	1182	338	844	102.227	LmxM.04.1230 | organism=Leishmania_mexicana_MHOM/GT/2001/U1103 | product=actin | location=LmxM.04:433272-434402(-) | length=1131 | sequence_SO=chromosome |	1131
LmxM.05.0010 | organism=Leishmania_mexicana_MHOM/GT/2001/U1103 | product=hypothetical protein, conserved | location=LmxM.05:6100-8847(+) | length=2748 | sequence_SO=chromosome | mapping	2748	2522	310	2212	90.6776	LmxM.05.0010 | organism=Leishmania_mexicana_MHOM/GT/2001/U1103 | product=hypothetical protein, conserved | location=LmxM.05:6100-8847(+) | length=2748 | sequence_SO=chromosome |	2748
LmxM.05.0020 | organism=Leishmania_mexicana_MHOM/GT/2001/U1103 | product=hypothetical protein, conserved | location=LmxM.05:9306-9725(+) | length=420 | sequence_SO=chromosome | mapping	420	477	381	96	109.121	LmxM.05.0020 | organism=Leishmania_mexicana_MHOM/GT/2001/U1103 | product=hypothetical protein, conserved | location=LmxM.05:9306-9725(+) | length=420 | sequence_SO=chromosome |	420
LmxM.05.0030 | organism=Leishmania_mexicana_MHOM/GT/2001/U1103 | product=small GTP-binding protein, putative | location=LmxM.05:10247-10834(+) | length=588 | sequence_SO=chromosome | mapping	588	582	366	216	96.0731	LmxM.05.0030 | organism=Leishmania_mexicana_MHOM/GT/2001/U1103 | product=small GTP-binding protein, putative | location=LmxM.05:10247-10834(+) | length=588 | sequence_SO=chromosome |	588
LmxM.05.0040 | organism=Leishmania_mexicana_MHOM/GT/2001/U1103 | product=paraflagellar rod component par4, putative | location=LmxM.05:11934-13679(+) | length=1746 | sequence_SO=chromosome | mapping	1746	1735	345	1390	97.6592	LmxM.05.0040 | organism=Leishmania_mexicana_MHOM/GT/2001/U1103 | product=paraflagellar rod component par4, putative | location=LmxM.05:11934-13679(+) | length=1746 | sequence_SO=chromosome |	1746
LmxM.05.0050 | organism=Leishmania_mexicana_MHOM/GT/2001/U1103 | product=hypothetical protein, conserved | location=LmxM.05:14863-17388(+) | length=2526 | sequence_SO=chromosome | mapping	2526	2360	246	2114	91.9117	LmxM.05.0050 | organism=Leishmania_mexicana_MHOM/GT/2001/U1103 | product=hypothetical protein, conserved | location=LmxM.05:14863-17388(+) | length=2526 | sequence_SO=chromosome |	2526
LmxM.05.0060 | organism=Leishmania_mexicana_MHOM/GT/2001/U1103 | product=major vault protein, putative | location=LmxM.05:18567-21068(+) | length=2502 | sequence_SO=chromosome | mapping	2502	2221	279	1942	87.4864	LmxM.05.0060 | organism=Leishmania_mexicana_MHOM/GT/2001/U1103 | product=major vault protein, putative | location=LmxM.05:18567-21068(+) | length=2502 | sequence_SO=chromosome |	2502
LmxM.05.0070 | organism=Leishmania_mexicana_MHOM/GT/2001/U1103 | product=dynein light chain, putative | location=LmxM.05:23155-23430(+) | length=276 | sequence_SO=chromosome | mapping	276	258	232	26	86.6304	LmxM.05.0070 | organism=Leishmania_mexicana_MHOM/GT/2001/U1103 | product=dynein light chain, putative | location=LmxM.05:23155-23430(+) | length=276 | sequence_SO=chromosome |	276
LmxM.05.0080 | organism=Leishmania_mexicana_MHOM/GT/2001/U1103 | product=hypothetical protein, conserved | location=LmxM.05:24379-24984(+) | length=606 | sequence_SO=chromosome | mapping	606	529	273	256	84.9736	LmxM.05.0080 | organism=Leishmania_mexicana_MHOM/GT/2001/U1103 | product=hypothetical protein, conserved | location=LmxM.05:24379-24984(+) | length=606 | sequence_SO=chromosome |	606
LmxM.05.0090 | organism=Leishmania_mexicana_MHOM/GT/2001/U1103 | product=hypothetical protein, conserved | location=LmxM.05:26347-26886(+) | length=540 | sequence_SO=chromosome | mapping	540	532	280	252	95.3981	LmxM.05.0090 | organism=Leishmania_mexicana_MHOM/GT/2001/U1103 | product=hypothetical protein, conserved | location=LmxM.05:26347-26886(+) | length=540 | sequence_SO=chromosome |	540
LmxM.05.0100 | organism=Leishmania_mexicana_MHOM/GT/2001/U1103 | product=phosphoprotein phosphatase, putative | location=LmxM.05:28707-30620(+) | length=1914 | sequence_SO=chromosome | mapping	1914	1785	305	1480	91.778	LmxM.05.0100 | organism=Leishmania_mexicana_MHOM/GT/2001/U1103 | product=phosphoprotein phosphatase, putative | location=LmxM.05:28707-30620(+) | length=1914 | sequence_SO=chromosome |	1914
LmxM.05.0110 | organism=Leishmania_mexicana_MHOM/GT/2001/U1103 | product=hypothetical protein, conserved | location=LmxM.05:33760-34131(+) | length=372 | sequence_SO=chromosome | mapping	372	362	326	36	91.4624	LmxM.05.0110 | organism=Leishmania_mexicana_MHOM/GT/2001/U1103 | product=hypothetical protein, conserved | location=LmxM.05:33760-34131(+) | length=372 | sequence_SO=chromosome |	372
LmxM.05.0120 | organism=Leishmania_mexicana_MHOM/GT/2001/U1103 | product=hypothetical protein, conserved | location=LmxM.05:35150-36166(+) | length=1017 | sequence_SO=chromosome | mapping	1017	953	317	636	91.3461	LmxM.05.0120 | organism=Leishmania_mexicana_MHOM/GT/2001/U1103 | product=hypothetical protein, conserved | location=LmxM.05:35150-36166(+) | length=1017 | sequence_SO=chromosome |	1017
LmxM.05.0130 | organism=Leishmania_mexicana_MHOM/GT/2001/U1103 | product=protein kinase, putative | location=LmxM.05:37778-39076(+) | length=1299 | sequence_SO=chromosome | mapping	1299	1402	348	1054	105.496	LmxM.05.0130 | organism=Leishmania_mexicana_MHOM/GT/2001/U1103 | product=protein kinase, putative | location=LmxM.05:37778-39076(+) | length=1299 | sequence_SO=chromosome |	1299
LmxM.05.0140 | organism=Leishmania_mexicana_MHOM/GT/2001/U1103 | product=nucleolar RNA helicase II, putative | location=LmxM.05:41666-43720(+) | length=2055 | sequence_SO=chromosome | mapping	2055	1923	285	1638	92.0774	LmxM.05.0140 | organism=Leishmania_mexicana_MHOM/GT/2001/U1103 | product=nucleolar RNA helicase II, putative | location=LmxM.05:41666-43720(+) | length=2055 | sequence_SO=chromosome |	2055
LmxM.05.0150 | organism=Leishmania_mexicana_MHOM/GT/2001/U1103 | product=hypothetical protein, conserved | location=LmxM.05:45032-46360(+) | length=1329 | sequence_SO=chromosome | mapping	1329	1427	329	1098	105.233	LmxM.05.0150 | organism=Leishmania_mexicana_MHOM/GT/2001/U1103 | product=hypothetical protein, conserved | location=LmxM.05:45032-46360(+) | length=1329 | sequence_SO=chromosome |	1329
LmxM.05.0160 | organism=Leishmania_mexicana_MHOM/GT/2001/U1103 | product=hypothetical protein, unknown function | location=LmxM.05:47392-48927(+) | length=1536 | sequence_SO=chromosome | mapping	1536	1559	345	1214	99.5365	LmxM.05.0160 | organism=Leishmania_mexicana_MHOM/GT/2001/U1103 | product=hypothetical protein, unknown function | location=LmxM.05:47392-48927(+) | length=1536 | sequence_SO=chromosome |	1536
LmxM.05.0170 | organism=Leishmania_mexicana_MHOM/GT/2001/U1103 | product=hypothetical protein, conserved | location=LmxM.05:49532-51820(+) | length=2289 | sequence_SO=chromosome | mapping	2289	2174	306	1868	93.5308	LmxM.05.0170 | organism=Leishmania_mexicana_MHOM/GT/2001/U1103 | product=hypothetical protein, conserved | location=LmxM.05:49532-51820(+) | length=2289 | sequence_SO=chromosome |	2289
LmxM.05.0180 | organism=Leishmania_mexicana_MHOM/GT/2001/U1103 | product=dihydrolipoamide branched chain transacylase, putative | location=LmxM.05:53244-54677(+) | length=1434 | sequence_SO=chromosome | mapping	1434	1512	322	1190	103.573	LmxM.05.0180 | organism=Leishmania_mexicana_MHOM/GT/2001/U1103 | product=dihydrolipoamide branched chain transacylase, putative | location=LmxM.05:53244-54677(+) | length=1434 | sequence_SO=chromosome |	1434
LmxM.05.0190 | organism=Leishmania_mexicana_MHOM/GT/2001/U1103 | product=hypothetical protein, conserved | location=LmxM.05:56256-57371(+) | length=1116 | sequence_SO=chromosome | mapping	1116	1054	322	732	91.9373	LmxM.05.0190 | organism=Leishmania_mexicana_MHOM/GT/2001/U1103 | product=hypothetical protein, conserved | location=LmxM.05:56256-57371(+) | length=1116 | sequence_SO=chromosome |	1116
LmxM.05.0200 | organism=Leishmania_mexicana_MHOM/GT/2001/U1103 | product=hypothetical protein, conserved | location=LmxM.05:58235-60598(+) | length=2364 | sequence_SO=chromosome | mapping	2364	2294	332	1962	95.2851	LmxM.05.0200 | organism=Leishmania_mexicana_MHOM/GT/2001/U1103 | product=hypothetical protein, conserved | location=LmxM.05:58235-60598(+) | length=2364 | sequence_SO=chromosome |	2364
LmxM.05.0210 | organism=Leishmania_mexicana_MHOM/GT/2001/U1103 | product=hypothetical protein, conserved | location=LmxM.05:61769-66193(+) | length=4425 | sequence_SO=chromosome | mapping	4425	4600	388	4212	102.633	LmxM.05.0210 | organism=Leishmania_mexicana_MHOM/GT/2001/U1103 | product=hypothetical protein, conserved | location=LmxM.05:61769-66193(+) | length=4425 | sequence_SO=chromosome |	4425
LmxM.05.0220 | organism=Leishmania_mexicana_MHOM/GT/2001/U1103 | product=dual specificity phosphatase-like protein | location=LmxM.05:67838-69721(+) | length=1884 | sequence_SO=chromosome | mapping	1884	1889	335	1554	98.1975	LmxM.05.0220 | organism=Leishmania_mexicana_MHOM/GT/2001/U1103 | product=dual specificity phosphatase-like protein | location=LmxM.05:67838-69721(+) | length=1884 | sequence_SO=chromosome |	1884
LmxM.05.0230 | organism=Leishmania_mexicana_MHOM/GT/2001/U1103 | product=hydrogenase, putative | location=LmxM.05:74205-76100(+) | length=1896 | sequence_SO=chromosome | mapping	1896	1848	290	1558	95.4457	LmxM.05.0230 | organism=Leishmania_mexicana_MHOM/GT/2001/U1103 | product=hydrogenase, putative | location=LmxM.05:74205-76100(+) | length=1896 | sequence_SO=chromosome |	1896
LmxM.05.0240 | organism=Leishmania_mexicana_MHOM/GT/2001/U1103 | product=viscerotropic leishmaniasis antigen, putative | location=LmxM.05:77820-81203(+) | length=3384 | sequence_SO=chromosome | mapping	3379	2591	655	1936	73.3354	LmxM.05.0240 | organism=Leishmania_mexicana_MHOM/GT/2001/U1103 | product=viscerotropic leishmaniasis antigen, putative | location=LmxM.05:77820-81203(+) | length=3384 | sequence_SO=chromosome |	3384
LmxM.05.0241 | organism=Leishmania_mexicana_MHOM/GT/2001/U1103 | product=viscerotropic leishmaniasis antigen, putative | location=LmxM.05:82520-86755(+) | length=4236 | sequence_SO=chromosome | mapping	4223	1746	268	1478	39.6022	LmxM.05.0241 | organism=Leishmania_mexicana_MHOM/GT/2001/U1103 | product=viscerotropic leishmaniasis antigen, putative | location=LmxM.05:82520-86755(+) | length=4236 | sequence_SO=chromosome |	4236
LmxM.05.0250 | organism=Leishmania_mexicana_MHOM/GT/2001/U1103 | product=hypothetical protein, conserved | location=LmxM.05:88436-88729(+) | length=294 | sequence_SO=chromosome | mapping	294	287	273	14	91.4796	LmxM.05.0250 | organism=Leishmania_mexicana_MHOM/GT/2001/U1103 | product=hypothetical protein, conserved | location=LmxM.05:88436-88729(+) | length=294 | sequence_SO=chromosome |	294
LmxM.05.0260 | organism=Leishmania_mexicana_MHOM/GT/2001/U1103 | product=hypothetical protein, conserved | location=LmxM.05:89410-90582(+) | length=1173 | sequence_SO=chromosome | mapping	1173	1043	193	850	87.0554	LmxM.05.0260 | organism=Leishmania_mexicana_MHOM/GT/2001/U1103 | product=hypothetical protein, conserved | location=LmxM.05:89410-90582(+) | length=1173 | sequence_SO=chromosome |	1173
LmxM.05.0270 | organism=Leishmania_mexicana_MHOM/GT/2001/U1103 | product=hypothetical protein, conserved | location=LmxM.05:91589-92542(+) | length=954 | sequence_SO=chromosome | mapping	954	864	296	568	88.4078	LmxM.05.0270 | organism=Leishmania_mexicana_MHOM/GT/2001/U1103 | product=hypothetical protein, conserved | location=LmxM.05:91589-92542(+) | length=954 | sequence_SO=chromosome |	954
LmxM.05.0280 | organism=Leishmania_mexicana_MHOM/GT/2001/U1103 | product=protein tyrosine phosphatase, putative | location=LmxM.05:93930-94604(+) | length=675 | sequence_SO=chromosome | mapping	675	668	320	348	96.3407	LmxM.05.0280 | organism=Leishmania_mexicana_MHOM/GT/2001/U1103 | product=protein tyrosine phosphatase, putative | location=LmxM.05:93930-94604(+) | length=675 | sequence_SO=chromosome |	675
LmxM.05.0285 | organism=Leishmania_mexicana_MHOM/GT/2001/U1103 | product=ARP2/3 complex 16kDa subunit, putative | location=LmxM.05:96374-96886(+) | length=513 | sequence_SO=chromosome | mapping	513	471	311	160	88.2729	LmxM.05.0285 | organism=Leishmania_mexicana_MHOM/GT/2001/U1103 | product=ARP2/3 complex 16kDa subunit, putative | location=LmxM.05:96374-96886(+) | length=513 | sequence_SO=chromosome |	513
LmxM.05.0290 | organism=Leishmania_mexicana_MHOM/GT/2001/U1103 | product=phosphate carrier protein, mitochondrial precursor-like protein | location=LmxM.05:98350-99807(+) | length=1458 | sequence_SO=chromosome | mapping	1458	1436	306	1130	96.131	LmxM.05.0290 | organism=Leishmania_mexicana_MHOM/GT/2001/U1103 | product=phosphate carrier protein, mitochondrial precursor-like protein | location=LmxM.05:98350-99807(+) | length=1458 | sequence_SO=chromosome |	1458
LmxM.05.0300 | organism=Leishmania_mexicana_MHOM/GT/2001/U1103 | product=hypothetical protein, conserved | location=LmxM.05:100402-102636(+) | length=2235 | sequence_SO=chromosome | mapping	2235	2169	297	1872	95.6908	LmxM.05.0300 | organism=Leishmania_mexicana_MHOM/GT/2001/U1103 | product=hypothetical protein, conserved | location=LmxM.05:100402-102636(+) | length=2235 | sequence_SO=chromosome |	2235
LmxM.05.0310 | organism=Leishmania_mexicana_MHOM/GT/2001/U1103 | product=glutaredoxin-like protein | location=LmxM.05:103391-103933(+) | length=543 | sequence_SO=chromosome | mapping	543	560	342	218	98.698	LmxM.05.0310 | organism=Leishmania_mexicana_MHOM/GT/2001/U1103 | product=glutaredoxin-like protein | location=LmxM.05:103391-103933(+) | length=543 | sequence_SO=chromosome |	543
LmxM.05.0320 | organism=Leishmania_mexicana_MHOM/GT/2001/U1103 | product=hypothetical protein, unknown function | location=LmxM.05:104291-104404(+) | length=114 | sequence_SO=chromosome | mapping	114	74	74	0	54.5702	LmxM.05.0320 | organism=Leishmania_mexicana_MHOM/GT/2001/U1103 | product=hypothetical protein, unknown function | location=LmxM.05:104291-104404(+) | length=114 | sequence_SO=chromosome |	114
LmxM.05.0330 | organism=Leishmania_mexicana_MHOM/GT/2001/U1103 | product=DNA replication licensing factor, putative,minichromosome maintenance protein-like protein | location=LmxM.05:105350-108358(+) | length=3009 | sequence_SO=chromosome | mapping	3009	2833	359	2474	92.7378	LmxM.05.0330 | organism=Leishmania_mexicana_MHOM/GT/2001/U1103 | product=DNA replication licensing factor, putative,minichromosome maintenance protein-like protein | location=LmxM.05:105350-108358(+) | length=3009 | sequence_SO=chromosome |	3009
LmxM.05.0340 | organism=Leishmania_mexicana_MHOM/GT/2001/U1103 | product=hypothetical protein, conserved | location=LmxM.05:109112-110227(+) | length=1116 | sequence_SO=chromosome | mapping	1116	1003	293	710	87.4875	LmxM.05.0340 | organism=Leishmania_mexicana_MHOM/GT/2001/U1103 | product=hypothetical protein, conserved | location=LmxM.05:109112-110227(+) | length=1116 | sequence_SO=chromosome |	1116
LmxM.05.0350 | organism=Leishmania_mexicana_MHOM/GT/2001/U1103 | product=trypanothione reductase | location=LmxM.05:113762-115237(+) | length=1476 | sequence_SO=chromosome | mapping	1476	1308	228	1080	86.6328	LmxM.05.0350 | organism=Leishmania_mexicana_MHOM/GT/2001/U1103 | product=trypanothione reductase | location=LmxM.05:113762-115237(+) | length=1476 | sequence_SO=chromosome |	1476
LmxM.05.0360 | organism=Leishmania_mexicana_MHOM/GT/2001/U1103 | product=ATP-dependent RNA helicase, putative | location=LmxM.05:116225-118090(+) | length=1866 | sequence_SO=chromosome | mapping	1866	1816	320	1496	95.2058	LmxM.05.0360 | organism=Leishmania_mexicana_MHOM/GT/2001/U1103 | product=ATP-dependent RNA helicase, putative | location=LmxM.05:116225-118090(+) | length=1866 | sequence_SO=chromosome |	1866
LmxM.05.0370 | organism=Leishmania_mexicana_MHOM/GT/2001/U1103 | product=hypothetical protein, conserved | location=LmxM.05:118876-119859(+) | length=984 | sequence_SO=chromosome | mapping	984	960	276	684	94.8069	LmxM.05.0370 | organism=Leishmania_mexicana_MHOM/GT/2001/U1103 | product=hypothetical protein, conserved | location=LmxM.05:118876-119859(+) | length=984 | sequence_SO=chromosome |	984
LmxM.05.0380 | organism=Leishmania_mexicana_MHOM/GT/2001/U1103 | product=microtubule-associated protein, putative | location=LmxM.05:121556-123904(+) | length=2349 | sequence_SO=chromosome | mapping	2347	4162	324	3838	163	LmxM.05.0380 | organism=Leishmania_mexicana_MHOM/GT/2001/U1103 | product=microtubule-associated protein, putative | location=LmxM.05:121556-123904(+) | length=2349 | sequence_SO=chromosome |	2349
LmxM.05.0390 | organism=Leishmania_mexicana_MHOM/GT/2001/U1103 | product=protein kinase, putative | location=LmxM.05:132062-134263(+) | length=2202 | sequence_SO=chromosome | mapping	2202	2166	314	1852	96.5064	LmxM.05.0390 | organism=Leishmania_mexicana_MHOM/GT/2001/U1103 | product=protein kinase, putative | location=LmxM.05:132062-134263(+) | length=2202 | sequence_SO=chromosome |	2202
LmxM.05.0400 | organism=Leishmania_mexicana_MHOM/GT/2001/U1103 | product=structural maintenance of chromosome (SMC), putative | location=LmxM.05:136035-139673(+) | length=3639 | sequence_SO=chromosome | mapping	3642	3585	375	3210	97.017	LmxM.05.0400 | organism=Leishmania_mexicana_MHOM/GT/2001/U1103 | product=structural maintenance of chromosome (SMC), putative | location=LmxM.05:136035-139673(+) | length=3639 | sequence_SO=chromosome |	3639
LmxM.05.0410 | organism=Leishmania_mexicana_MHOM/GT/2001/U1103 | product=hypothetical protein, conserved | location=LmxM.05:140668-143409(+) | length=2742 | sequence_SO=chromosome | mapping	2742	2806	282	2524	100.873	LmxM.05.0410 | organism=Leishmania_mexicana_MHOM/GT/2001/U1103 | product=hypothetical protein, conserved | location=LmxM.05:140668-143409(+) | length=2742 | sequence_SO=chromosome |	2742
LmxM.05.0420 | organism=Leishmania_mexicana_MHOM/GT/2001/U1103 | product=dynein-light chain-protein, putative | location=LmxM.05:144281-144616(+) | length=336 | sequence_SO=chromosome | mapping	336	330	304	26	92.8452	LmxM.05.0420 | organism=Leishmania_mexicana_MHOM/GT/2001/U1103 | product=dynein-light chain-protein, putative | location=LmxM.05:144281-144616(+) | length=336 | sequence_SO=chromosome |	336
LmxM.05.0430 | organism=Leishmania_mexicana_MHOM/GT/2001/U1103 | product=hypothetical protein, conserved | location=LmxM.05:147299-149329(+) | length=2031 | sequence_SO=chromosome | mapping	2031	1979	313	1666	95.6947	LmxM.05.0430 | organism=Leishmania_mexicana_MHOM/GT/2001/U1103 | product=hypothetical protein, conserved | location=LmxM.05:147299-149329(+) | length=2031 | sequence_SO=chromosome |	2031
LmxM.05.0440 | organism=Leishmania_mexicana_MHOM/GT/2001/U1103 | product=hypothetical protein, conserved | location=LmxM.05:149837-152407(+) | length=2571 | sequence_SO=chromosome | mapping	2571	2448	202	2246	93.6173	LmxM.05.0440 | organism=Leishmania_mexicana_MHOM/GT/2001/U1103 | product=hypothetical protein, conserved | location=LmxM.05:149837-152407(+) | length=2571 | sequence_SO=chromosome |	2571
LmxM.05.0450 | organism=Leishmania_mexicana_MHOM/GT/2001/U1103 | product=hypothetical protein, conserved | location=LmxM.05:153602-154192(+) | length=591 | sequence_SO=chromosome | mapping	591	667	373	294	109.496	LmxM.05.0450 | organism=Leishmania_mexicana_MHOM/GT/2001/U1103 | product=hypothetical protein, conserved | location=LmxM.05:153602-154192(+) | length=591 | sequence_SO=chromosome |	591
LmxM.05.0460 | organism=Leishmania_mexicana_MHOM/GT/2001/U1103 | product=GTPase, putative | location=LmxM.05:155089-156972(+) | length=1884 | sequence_SO=chromosome | mapping	1884	2171	371	1800	113.556	LmxM.05.0460 | organism=Leishmania_mexicana_MHOM/GT/2001/U1103 | product=GTPase, putative | location=LmxM.05:155089-156972(+) | length=1884 | sequence_SO=chromosome |	1884
LmxM.05.0470 | organism=Leishmania_mexicana_MHOM/GT/2001/U1103 | product=hypothetical protein, unknown function | location=LmxM.05:158358-159086(+) | length=729 | sequence_SO=chromosome | mapping	729	709	323	386	94.0535	LmxM.05.0470 | organism=Leishmania_mexicana_MHOM/GT/2001/U1103 | product=hypothetical protein, unknown function | location=LmxM.05:158358-159086(+) | length=729 | sequence_SO=chromosome |	729
LmxM.05.0480 | organism=Leishmania_mexicana_MHOM/GT/2001/U1103 | product=monocarboxylate transporter-like protein | location=LmxM.05:160012-161733(+) | length=1722 | sequence_SO=chromosome | mapping	1722	1694	284	1410	96.4384	LmxM.05.0480 | organism=Leishmania_mexicana_MHOM/GT/2001/U1103 | product=monocarboxylate transporter-like protein | location=LmxM.05:160012-161733(+) | length=1722 | sequence_SO=chromosome |	1722
LmxM.05.0490 | organism=Leishmania_mexicana_MHOM/GT/2001/U1103 | product=hypothetical protein, conserved | location=LmxM.05:166527-167030(+) | length=504 | sequence_SO=chromosome | mapping	504	385	219	166	73.5635	LmxM.05.0490 | organism=Leishmania_mexicana_MHOM/GT/2001/U1103 | product=hypothetical protein, conserved | location=LmxM.05:166527-167030(+) | length=504 | sequence_SO=chromosome |	504
LmxM.05.0500 | organism=Leishmania_mexicana_MHOM/GT/2001/U1103 | product=ATPase alpha subunit, putative | location=LmxM.05:168744-170468(+) | length=1725 | sequence_SO=chromosome | mapping	1722	1482	192	1290	84.087	LmxM.05.0500 | organism=Leishmania_mexicana_MHOM/GT/2001/U1103 | product=ATPase alpha subunit, putative | location=LmxM.05:168744-170468(+) | length=1725 | sequence_SO=chromosome |	1725
LmxM.05.0510 | organism=Leishmania_mexicana_MHOM/GT/2001/U1103 | product=ATPase alpha subunit, putative | location=LmxM.05:172168-174177(+) | length=2010 | sequence_SO=chromosome | mapping	2008	2401	419	1982	115.218	LmxM.05.0510 | organism=Leishmania_mexicana_MHOM/GT/2001/U1103 | product=ATPase alpha subunit, putative | location=LmxM.05:172168-174177(+) | length=2010 | sequence_SO=chromosome |	2010
LmxM.05.0510b | organism=Leishmania_mexicana_MHOM/GT/2001/U1103 | product=unspecified product | location=LmxM.00:427823-429547(+) | length=1725 | sequence_SO=random_sequence | mapping	1722	1473	193	1280	84.0342	LmxM.05.0510b | organism=Leishmania_mexicana_MHOM/GT/2001/U1103 | product=unspecified product | location=LmxM.00:427823-429547(+) | length=1725 | sequence_SO=random_sequence |	1725
LmxM.05.0520 | organism=Leishmania_mexicana_MHOM/GT/2001/U1103 | product=nuclear receptor binding factor-like protein | location=LmxM.05:176688-177710(+) | length=1023 | sequence_SO=chromosome | mapping	1023	1078	366	712	102.665	LmxM.05.0520 | organism=Leishmania_mexicana_MHOM/GT/2001/U1103 | product=nuclear receptor binding factor-like protein | location=LmxM.05:176688-177710(+) | length=1023 | sequence_SO=chromosome |	1023
LmxM.05.0530 | organism=Leishmania_mexicana_MHOM/GT/2001/U1103 | product=kinetoplast-associated protein-like protein | location=LmxM.05:178546-184713(+) | length=6168 | sequence_SO=chromosome | mapping	6168	5975	257	5718	95.3264	LmxM.05.0530 | organism=Leishmania_mexicana_MHOM/GT/2001/U1103 | product=kinetoplast-associated protein-like protein | location=LmxM.05:178546-184713(+) | length=6168 | sequence_SO=chromosome |	6168
LmxM.05.0540 | organism=Leishmania_mexicana_MHOM/GT/2001/U1103 | product=hypothetical protein, conserved | location=LmxM.05:185270-185683(+) | length=414 | sequence_SO=chromosome | mapping	414	383	289	94	89.1256	LmxM.05.0540 | organism=Leishmania_mexicana_MHOM/GT/2001/U1103 | product=hypothetical protein, conserved | location=LmxM.05:185270-185683(+) | length=414 | sequence_SO=chromosome |	414
LmxM.05.0550 | organism=Leishmania_mexicana_MHOM/GT/2001/U1103 | product=protein kinase, putative,cdc2-related kinase, putative | location=LmxM.05:187016-187972(+) | length=957 | sequence_SO=chromosome | mapping	957	962	322	640	97.7262	LmxM.05.0550 | organism=Leishmania_mexicana_MHOM/GT/2001/U1103 | product=protein kinase, putative,cdc2-related kinase, putative | location=LmxM.05:187016-187972(+) | length=957 | sequence_SO=chromosome |	957
LmxM.05.0560 | organism=Leishmania_mexicana_MHOM/GT/2001/U1103 | product=hypothetical protein, conserved | location=LmxM.05:189319-190578(+) | length=1260 | sequence_SO=chromosome | mapping	1260	1214	286	928	94.2095	LmxM.05.0560 | organism=Leishmania_mexicana_MHOM/GT/2001/U1103 | product=hypothetical protein, conserved | location=LmxM.05:189319-190578(+) | length=1260 | sequence_SO=chromosome |	1260
LmxM.05.0570 | organism=Leishmania_mexicana_MHOM/GT/2001/U1103 | product=hypothetical protein, conserved | location=LmxM.05:193071-194303(+) | length=1233 | sequence_SO=chromosome | mapping	1233	1178	282	896	93.4412	LmxM.05.0570 | organism=Leishmania_mexicana_MHOM/GT/2001/U1103 | product=hypothetical protein, conserved | location=LmxM.05:193071-194303(+) | length=1233 | sequence_SO=chromosome |	1233
LmxM.05.0580 | organism=Leishmania_mexicana_MHOM/GT/2001/U1103 | product=hypothetical protein, conserved | location=LmxM.05:195403-197766(+) | length=2364 | sequence_SO=chromosome | mapping	2370	2271	231	2040	94.0838	LmxM.05.0580 | organism=Leishmania_mexicana_MHOM/GT/2001/U1103 | product=hypothetical protein, conserved | location=LmxM.05:195403-197766(+) | length=2364 | sequence_SO=chromosome |	2364
LmxM.05.0590 | organism=Leishmania_mexicana_MHOM/GT/2001/U1103 | product=ATP-dependent RNA helicase, putative | location=LmxM.05:200361-203348(+) | length=2988 | sequence_SO=chromosome | mapping	2988	2910	304	2606	95.66	LmxM.05.0590 | organism=Leishmania_mexicana_MHOM/GT/2001/U1103 | product=ATP-dependent RNA helicase, putative | location=LmxM.05:200361-203348(+) | length=2988 | sequence_SO=chromosome |	2988
LmxM.05.0600 | organism=Leishmania_mexicana_MHOM/GT/2001/U1103 | product=hypothetical protein, conserved | location=LmxM.05:203997-206729(+) | length=2733 | sequence_SO=chromosome | mapping	2733	2537	255	2282	91.2847	LmxM.05.0600 | organism=Leishmania_mexicana_MHOM/GT/2001/U1103 | product=hypothetical protein, conserved | location=LmxM.05:203997-206729(+) | length=2733 | sequence_SO=chromosome |	2733
LmxM.05.0610 | organism=Leishmania_mexicana_MHOM/GT/2001/U1103 | product=hypothetical protein, conserved | location=LmxM.05:207638-210391(+) | length=2754 | sequence_SO=chromosome | mapping	2754	2740	332	2408	98.0915	LmxM.05.0610 | organism=Leishmania_mexicana_MHOM/GT/2001/U1103 | product=hypothetical protein, conserved | location=LmxM.05:207638-210391(+) | length=2754 | sequence_SO=chromosome |	2754
LmxM.05.0620 | organism=Leishmania_mexicana_MHOM/GT/2001/U1103 | product=hypothetical protein, conserved | location=LmxM.05:211373-214012(+) | length=2640 | sequence_SO=chromosome | mapping	2640	2381	309	2072	88.7015	LmxM.05.0620 | organism=Leishmania_mexicana_MHOM/GT/2001/U1103 | product=hypothetical protein, conserved | location=LmxM.05:211373-214012(+) | length=2640 | sequence_SO=chromosome |	2640
LmxM.05.0630 | organism=Leishmania_mexicana_MHOM/GT/2001/U1103 | product=kinesin, putative | location=LmxM.05:214955-218623(+) | length=3669 | sequence_SO=chromosome | mapping	3669	3809	353	3456	102.463	LmxM.05.0630 | organism=Leishmania_mexicana_MHOM/GT/2001/U1103 | product=kinesin, putative | location=LmxM.05:214955-218623(+) | length=3669 | sequence_SO=chromosome |	3669
LmxM.05.0640 | organism=Leishmania_mexicana_MHOM/GT/2001/U1103 | product=hypothetical protein, conserved | location=LmxM.05:219498-225275(+) | length=5778 | sequence_SO=chromosome | mapping	5778	5540	300	5240	94.202	LmxM.05.0640 | organism=Leishmania_mexicana_MHOM/GT/2001/U1103 | product=hypothetical protein, conserved | location=LmxM.05:219498-225275(+) | length=5778 | sequence_SO=chromosome |	5778
LmxM.05.0650 | organism=Leishmania_mexicana_MHOM/GT/2001/U1103 | product=hypothetical protein, conserved | location=LmxM.05:226621-229185(+) | length=2565 | sequence_SO=chromosome | mapping	2565	2347	329	2018	89.6472	LmxM.05.0650 | organism=Leishmania_mexicana_MHOM/GT/2001/U1103 | product=hypothetical protein, conserved | location=LmxM.05:226621-229185(+) | length=2565 | sequence_SO=chromosome |	2565
LmxM.05.0660 | organism=Leishmania_mexicana_MHOM/GT/2001/U1103 | product=nitroreductase-like protein | location=LmxM.05:231584-232531(+) | length=948 | sequence_SO=chromosome | mapping	948	908	262	646	93.0886	LmxM.05.0660 | organism=Leishmania_mexicana_MHOM/GT/2001/U1103 | product=nitroreductase-like protein | location=LmxM.05:231584-232531(+) | length=948 | sequence_SO=chromosome |	948
LmxM.05.0670 | organism=Leishmania_mexicana_MHOM/GT/2001/U1103 | product=hypothetical protein, conserved | location=LmxM.05:233588-240838(+) | length=7251 | sequence_SO=chromosome | mapping	7248	6943	299	6644	94.0211	LmxM.05.0670 | organism=Leishmania_mexicana_MHOM/GT/2001/U1103 | product=hypothetical protein, conserved | location=LmxM.05:233588-240838(+) | length=7251 | sequence_SO=chromosome |	7251
LmxM.05.0680 | organism=Leishmania_mexicana_MHOM/GT/2001/U1103 | product=sre-2/carboxylate carrier-like protein | location=LmxM.05:242661-243701(+) | length=1041 | sequence_SO=chromosome | mapping	1041	1003	273	730	94.4304	LmxM.05.0680 | organism=Leishmania_mexicana_MHOM/GT/2001/U1103 | product=sre-2/carboxylate carrier-like protein | location=LmxM.05:242661-243701(+) | length=1041 | sequence_SO=chromosome |	1041
LmxM.05.0690 | organism=Leishmania_mexicana_MHOM/GT/2001/U1103 | product=hypothetical protein, conserved | location=LmxM.05:245055-252776(+) | length=7722 | sequence_SO=chromosome | mapping	7723	7208	398	6810	91.7502	LmxM.05.0690 | organism=Leishmania_mexicana_MHOM/GT/2001/U1103 | product=hypothetical protein, conserved | location=LmxM.05:245055-252776(+) | length=7722 | sequence_SO=chromosome |	7722
LmxM.05.0700 | organism=Leishmania_mexicana_MHOM/GT/2001/U1103 | product=hypothetical protein, conserved | location=LmxM.05:255110-260308(+) | length=5199 | sequence_SO=chromosome | mapping	5199	4971	317	4654	94.0479	LmxM.05.0700 | organism=Leishmania_mexicana_MHOM/GT/2001/U1103 | product=hypothetical protein, conserved | location=LmxM.05:255110-260308(+) | length=5199 | sequence_SO=chromosome |	5199
LmxM.05.0710 | organism=Leishmania_mexicana_MHOM/GT/2001/U1103 | product=CYC2-like cyclin, putative | location=LmxM.05:262515-266741(+) | length=4227 | sequence_SO=chromosome | mapping	4226	4008	276	3732	92.8874	LmxM.05.0710 | organism=Leishmania_mexicana_MHOM/GT/2001/U1103 | product=CYC2-like cyclin, putative | location=LmxM.05:262515-266741(+) | length=4227 | sequence_SO=chromosome |	4227
LmxM.05.0720 | organism=Leishmania_mexicana_MHOM/GT/2001/U1103 | product=phosphatase-like protein | location=LmxM.05:268989-273164(+) | length=4176 | sequence_SO=chromosome | mapping	4173	3985	283	3702	93.9523	LmxM.05.0720 | organism=Leishmania_mexicana_MHOM/GT/2001/U1103 | product=phosphatase-like protein | location=LmxM.05:268989-273164(+) | length=4176 | sequence_SO=chromosome |	4176
LmxM.05.0730 | organism=Leishmania_mexicana_MHOM/GT/2001/U1103 | product=hypothetical protein, conserved | location=LmxM.05:274638-276815(+) | length=2178 | sequence_SO=chromosome | mapping	2178	2076	216	1860	93.7406	LmxM.05.0730 | organism=Leishmania_mexicana_MHOM/GT/2001/U1103 | product=hypothetical protein, conserved | location=LmxM.05:274638-276815(+) | length=2178 | sequence_SO=chromosome |	2178
LmxM.05.0740 | organism=Leishmania_mexicana_MHOM/GT/2001/U1103 | product=hypothetical protein, conserved | location=LmxM.05:278430-279533(+) | length=1104 | sequence_SO=chromosome | mapping	1104	957	259	698	83.5136	LmxM.05.0740 | organism=Leishmania_mexicana_MHOM/GT/2001/U1103 | product=hypothetical protein, conserved | location=LmxM.05:278430-279533(+) | length=1104 | sequence_SO=chromosome |	1104
LmxM.05.0750 | organism=Leishmania_mexicana_MHOM/GT/2001/U1103 | product=hypothetical protein, conserved | location=LmxM.05:280816-283212(+) | length=2397 | sequence_SO=chromosome | mapping	2397	2489	367	2122	101.821	LmxM.05.0750 | organism=Leishmania_mexicana_MHOM/GT/2001/U1103 | product=hypothetical protein, conserved | location=LmxM.05:280816-283212(+) | length=2397 | sequence_SO=chromosome |	2397
LmxM.05.0760 | organism=Leishmania_mexicana_MHOM/GT/2001/U1103 | product=kinesin-like protein | location=LmxM.05:284173-288564(+) | length=4392 | sequence_SO=chromosome | mapping	4392	4129	309	3820	91.9139	LmxM.05.0760 | organism=Leishmania_mexicana_MHOM/GT/2001/U1103 | product=kinesin-like protein | location=LmxM.05:284173-288564(+) | length=4392 | sequence_SO=chromosome |	4392
LmxM.05.0770 | organism=Leishmania_mexicana_MHOM/GT/2001/U1103 | product=hypothetical protein, unknown function | location=LmxM.05:290258-294382(+) | length=4125 | sequence_SO=chromosome | mapping	4106	4172	338	3834	99.3852	LmxM.05.0770 | organism=Leishmania_mexicana_MHOM/GT/2001/U1103 | product=hypothetical protein, unknown function | location=LmxM.05:290258-294382(+) | length=4125 | sequence_SO=chromosome |	4125
LmxM.05.0780 | organism=Leishmania_mexicana_MHOM/GT/2001/U1103 | product=hypothetical protein, conserved | location=LmxM.05:295838-296281(+) | length=444 | sequence_SO=chromosome | mapping	444	395	305	90	85.0135	LmxM.05.0780 | organism=Leishmania_mexicana_MHOM/GT/2001/U1103 | product=hypothetical protein, conserved | location=LmxM.05:295838-296281(+) | length=444 | sequence_SO=chromosome |	444
LmxM.05.0790 | organism=Leishmania_mexicana_MHOM/GT/2001/U1103 | product=hypothetical protein, conserved | location=LmxM.05:298052-299221(+) | length=1170 | sequence_SO=chromosome | mapping	1170	1108	276	832	92.1829	LmxM.05.0790 | organism=Leishmania_mexicana_MHOM/GT/2001/U1103 | product=hypothetical protein, conserved | location=LmxM.05:298052-299221(+) | length=1170 | sequence_SO=chromosome |	1170
LmxM.05.0800 | organism=Leishmania_mexicana_MHOM/GT/2001/U1103 | product=MYND zinc finger (ZnF) domain-like protein | location=LmxM.05:299820-301109(+) | length=1290 | sequence_SO=chromosome | mapping	1290	1212	290	922	91.9194	LmxM.05.0800 | organism=Leishmania_mexicana_MHOM/GT/2001/U1103 | product=MYND zinc finger (ZnF) domain-like protein | location=LmxM.05:299820-301109(+) | length=1290 | sequence_SO=chromosome |	1290
LmxM.05.0810 | organism=Leishmania_mexicana_MHOM/GT/2001/U1103 | product=hypothetical protein, conserved | location=LmxM.05:301911-302402(+) | length=492 | sequence_SO=chromosome | mapping	492	460	270	190	88.8252	LmxM.05.0810 | organism=Leishmania_mexicana_MHOM/GT/2001/U1103 | product=hypothetical protein, conserved | location=LmxM.05:301911-302402(+) | length=492 | sequence_SO=chromosome |	492
LmxM.05.0820 | organism=Leishmania_mexicana_MHOM/GT/2001/U1103 | product=hypothetical protein, conserved | location=LmxM.05:303280-306066(+) | length=2787 | sequence_SO=chromosome | mapping	2787	2931	357	2574	103.186	LmxM.05.0820 | organism=Leishmania_mexicana_MHOM/GT/2001/U1103 | product=hypothetical protein, conserved | location=LmxM.05:303280-306066(+) | length=2787 | sequence_SO=chromosome |	2787
LmxM.05.0830 | organism=Leishmania_mexicana_MHOM/GT/2001/U1103 | product=methylthioadenosine phosphorylase, putative | location=LmxM.05:306947-307867(+) | length=921 | sequence_SO=chromosome | mapping	921	874	286	588	91.9772	LmxM.05.0830 | organism=Leishmania_mexicana_MHOM/GT/2001/U1103 | product=methylthioadenosine phosphorylase, putative | location=LmxM.05:306947-307867(+) | length=921 | sequence_SO=chromosome |	921
LmxM.05.0840 | organism=Leishmania_mexicana_MHOM/GT/2001/U1103 | product=hypothetical protein, unknown function | location=LmxM.05:310867-314838(+) | length=3972 | sequence_SO=chromosome | mapping	3972	3911	403	3508	96.4484	LmxM.05.0840 | organism=Leishmania_mexicana_MHOM/GT/2001/U1103 | product=hypothetical protein, unknown function | location=LmxM.05:310867-314838(+) | length=3972 | sequence_SO=chromosome |	3972
LmxM.05.0850 | organism=Leishmania_mexicana_MHOM/GT/2001/U1103 | product=hypothetical protein, conserved | location=LmxM.05:316219-318138(+) | length=1920 | sequence_SO=chromosome | mapping	1920	1829	289	1540	93.2719	LmxM.05.0850 | organism=Leishmania_mexicana_MHOM/GT/2001/U1103 | product=hypothetical protein, conserved | location=LmxM.05:316219-318138(+) | length=1920 | sequence_SO=chromosome |	1920
LmxM.05.0860 | organism=Leishmania_mexicana_MHOM/GT/2001/U1103 | product=hypothetical protein, conserved | location=LmxM.05:319302-319769(+) | length=468 | sequence_SO=chromosome | mapping	468	445	289	156	90.6517	LmxM.05.0860 | organism=Leishmania_mexicana_MHOM/GT/2001/U1103 | product=hypothetical protein, conserved | location=LmxM.05:319302-319769(+) | length=468 | sequence_SO=chromosome |	468
LmxM.05.0870 | organism=Leishmania_mexicana_MHOM/GT/2001/U1103 | product=hypothetical protein, conserved | location=LmxM.05:320542-326307(+) | length=5766 | sequence_SO=chromosome | mapping	5766	5738	242	5496	98.0251	LmxM.05.0870 | organism=Leishmania_mexicana_MHOM/GT/2001/U1103 | product=hypothetical protein, conserved | location=LmxM.05:320542-326307(+) | length=5766 | sequence_SO=chromosome |	5766
LmxM.05.0880 | organism=Leishmania_mexicana_MHOM/GT/2001/U1103 | product=hypothetical protein, conserved | location=LmxM.05:327337-327942(+) | length=606 | sequence_SO=chromosome | mapping	606	590	304	286	93.5825	LmxM.05.0880 | organism=Leishmania_mexicana_MHOM/GT/2001/U1103 | product=hypothetical protein, conserved | location=LmxM.05:327337-327942(+) | length=606 | sequence_SO=chromosome |	606
LmxM.05.0890 | organism=Leishmania_mexicana_MHOM/GT/2001/U1103 | product=hypothetical protein, conserved | location=LmxM.05:329338-335286(+) | length=5949 | sequence_SO=chromosome | mapping	5949	5923	345	5578	98.1817	LmxM.05.0890 | organism=Leishmania_mexicana_MHOM/GT/2001/U1103 | product=hypothetical protein, conserved | location=LmxM.05:329338-335286(+) | length=5949 | sequence_SO=chromosome |	5949
LmxM.05.0900 | organism=Leishmania_mexicana_MHOM/GT/2001/U1103 | product=surface antigen-like protein | location=LmxM.05:336421-337281(+) | length=861 | sequence_SO=chromosome | mapping	861	790	282	508	89.2985	LmxM.05.0900 | organism=Leishmania_mexicana_MHOM/GT/2001/U1103 | product=surface antigen-like protein | location=LmxM.05:336421-337281(+) | length=861 | sequence_SO=chromosome |	861
LmxM.05.0910 | organism=Leishmania_mexicana_MHOM/GT/2001/U1103 | product=hypothetical protein, conserved | location=LmxM.05:338997-342167(+) | length=3171 | sequence_SO=chromosome | mapping	3171	3310	364	2946	103.015	LmxM.05.0910 | organism=Leishmania_mexicana_MHOM/GT/2001/U1103 | product=hypothetical protein, conserved | location=LmxM.05:338997-342167(+) | length=3171 | sequence_SO=chromosome |	3171
LmxM.05.0920 | organism=Leishmania_mexicana_MHOM/GT/2001/U1103 | product=paraflagellar rod protein, putative | location=LmxM.05:342773-345997(+) | length=3225 | sequence_SO=chromosome | mapping	3225	3303	271	3032	100.759	LmxM.05.0920 | organism=Leishmania_mexicana_MHOM/GT/2001/U1103 | product=paraflagellar rod protein, putative | location=LmxM.05:342773-345997(+) | length=3225 | sequence_SO=chromosome |	3225
LmxM.05.0930 | organism=Leishmania_mexicana_MHOM/GT/2001/U1103 | product=ubiquitin-conjugating enzyme, putative | location=LmxM.05:347731-349122(+) | length=1392 | sequence_SO=chromosome | mapping	1392	1241	289	952	87.1401	LmxM.05.0930 | organism=Leishmania_mexicana_MHOM/GT/2001/U1103 | product=ubiquitin-conjugating enzyme, putative | location=LmxM.05:347731-349122(+) | length=1392 | sequence_SO=chromosome |	1392
LmxM.05.0940 | organism=Leishmania_mexicana_MHOM/GT/2001/U1103 | product=hypothetical protein, conserved | location=LmxM.05:350074-353892(+) | length=3819 | sequence_SO=chromosome | mapping	3819	3759	289	3470	96.9283	LmxM.05.0940 | organism=Leishmania_mexicana_MHOM/GT/2001/U1103 | product=hypothetical protein, conserved | location=LmxM.05:350074-353892(+) | length=3819 | sequence_SO=chromosome |	3819
LmxM.05.0950 | organism=Leishmania_mexicana_MHOM/GT/2001/U1103 | product=glutaminyl cyclase, putative | location=LmxM.05:355050-357776(+) | length=2727 | sequence_SO=chromosome | mapping	2727	2621	265	2356	94.4254	LmxM.05.0950 | organism=Leishmania_mexicana_MHOM/GT/2001/U1103 | product=glutaminyl cyclase, putative | location=LmxM.05:355050-357776(+) | length=2727 | sequence_SO=chromosome |	2727
LmxM.05.0960 | organism=Leishmania_mexicana_MHOM/GT/2001/U1103 | product=dipeptidyl-peptidase III, putative,metallo-peptidase, Clan M-, Family M49 | location=LmxM.05:358745-360784(+) | length=2040 | sequence_SO=chromosome | mapping	2040	1892	276	1616	91.0426	LmxM.05.0960 | organism=Leishmania_mexicana_MHOM/GT/2001/U1103 | product=dipeptidyl-peptidase III, putative,metallo-peptidase, Clan M-, Family M49 | location=LmxM.05:358745-360784(+) | length=2040 | sequence_SO=chromosome |	2040
LmxM.05.0970 | organism=Leishmania_mexicana_MHOM/GT/2001/U1103 | product=mercaptopyruvate sulfurtransferase | location=LmxM.05:368843-369955(-) | length=1113 | sequence_SO=chromosome | mapping	1113	1172	326	846	102.724	LmxM.05.0970 | organism=Leishmania_mexicana_MHOM/GT/2001/U1103 | product=mercaptopyruvate sulfurtransferase | location=LmxM.05:368843-369955(-) | length=1113 | sequence_SO=chromosome |	1113
LmxM.05.0980 | organism=Leishmania_mexicana_MHOM/GT/2001/U1103 | product=NADH-ubiquinone oxidoreductase, mitochondrial, putative | location=LmxM.05:370936-372381(-) | length=1446 | sequence_SO=chromosome | mapping	1446	1437	361	1076	97.352	LmxM.05.0980 | organism=Leishmania_mexicana_MHOM/GT/2001/U1103 | product=NADH-ubiquinone oxidoreductase, mitochondrial, putative | location=LmxM.05:370936-372381(-) | length=1446 | sequence_SO=chromosome |	1446
LmxM.05.0990 | organism=Leishmania_mexicana_MHOM/GT/2001/U1103 | product=hypothetical protein, conserved | location=LmxM.05:373141-373410(-) | length=270 | sequence_SO=chromosome | mapping	270	207	203	4	70.5074	LmxM.05.0990 | organism=Leishmania_mexicana_MHOM/GT/2001/U1103 | product=hypothetical protein, conserved | location=LmxM.05:373141-373410(-) | length=270 | sequence_SO=chromosome |	270
LmxM.05.1000 | organism=Leishmania_mexicana_MHOM/GT/2001/U1103 | product=hypothetical protein, conserved | location=LmxM.05:375252-375563(-) | length=312 | sequence_SO=chromosome | mapping	312	277	259	18	82.8974	LmxM.05.1000 | organism=Leishmania_mexicana_MHOM/GT/2001/U1103 | product=hypothetical protein, conserved | location=LmxM.05:375252-375563(-) | length=312 | sequence_SO=chromosome |	312
LmxM.05.1010 | organism=Leishmania_mexicana_MHOM/GT/2001/U1103 | product=methyltransferase-like protein | location=LmxM.05:376477-378318(-) | length=1842 | sequence_SO=chromosome | mapping	1842	1756	326	1430	93.2584	LmxM.05.1010 | organism=Leishmania_mexicana_MHOM/GT/2001/U1103 | product=methyltransferase-like protein | location=LmxM.05:376477-378318(-) | length=1842 | sequence_SO=chromosome |	1842
LmxM.05.1020 | organism=Leishmania_mexicana_MHOM/GT/2001/U1103 | product=hypothetical protein, conserved | location=LmxM.05:379268-382027(-) | length=2760 | sequence_SO=chromosome | mapping	2760	2829	335	2494	101.186	LmxM.05.1020 | organism=Leishmania_mexicana_MHOM/GT/2001/U1103 | product=hypothetical protein, conserved | location=LmxM.05:379268-382027(-) | length=2760 | sequence_SO=chromosome |	2760
LmxM.05.1030 | organism=Leishmania_mexicana_MHOM/GT/2001/U1103 | product=hypothetical protein, conserved | location=LmxM.05:382539-382976(-) | length=438 | sequence_SO=chromosome | mapping	438	512	392	120	111.527	LmxM.05.1030 | organism=Leishmania_mexicana_MHOM/GT/2001/U1103 | product=hypothetical protein, conserved | location=LmxM.05:382539-382976(-) | length=438 | sequence_SO=chromosome |	438
LmxM.05.1040 | organism=Leishmania_mexicana_MHOM/GT/2001/U1103 | product=stomatin-like protein | location=LmxM.05:383464-384537(-) | length=1074 | sequence_SO=chromosome | mapping	1074	1358	438	920	124.172	LmxM.05.1040 | organism=Leishmania_mexicana_MHOM/GT/2001/U1103 | product=stomatin-like protein | location=LmxM.05:383464-384537(-) | length=1074 | sequence_SO=chromosome |	1074
LmxM.05.1050 | organism=Leishmania_mexicana_MHOM/GT/2001/U1103 | product=hypothetical protein, unknown function | location=LmxM.05:385998-387329(+) | length=1332 | sequence_SO=chromosome | mapping	1332	1512	386	1126	111.166	LmxM.05.1050 | organism=Leishmania_mexicana_MHOM/GT/2001/U1103 | product=hypothetical protein, unknown function | location=LmxM.05:385998-387329(+) | length=1332 | sequence_SO=chromosome |	1332
LmxM.05.1060 | organism=Leishmania_mexicana_MHOM/GT/2001/U1103 | product=ATPase, putative | location=LmxM.05:388266-389702(+) | length=1437 | sequence_SO=chromosome | mapping	1437	1051	289	762	71.7933	LmxM.05.1060 | organism=Leishmania_mexicana_MHOM/GT/2001/U1103 | product=ATPase, putative | location=LmxM.05:388266-389702(+) | length=1437 | sequence_SO=chromosome |	1437
LmxM.05.1061 | organism=Leishmania_mexicana_MHOM/GT/2001/U1103 | product=ATPase, putative | location=LmxM.05:390956-391930(+) | length=975 | sequence_SO=chromosome | mapping	972	452	96	356	45.4215	LmxM.05.1061 | organism=Leishmania_mexicana_MHOM/GT/2001/U1103 | product=ATPase, putative | location=LmxM.05:390956-391930(+) | length=975 | sequence_SO=chromosome |	975
LmxM.05.1070 | organism=Leishmania_mexicana_MHOM/GT/2001/U1103 | product=hypothetical protein, conserved | location=LmxM.05:392659-394227(+) | length=1569 | sequence_SO=chromosome | mapping	1567	715	113	602	44.6361	LmxM.05.1070 | organism=Leishmania_mexicana_MHOM/GT/2001/U1103 | product=hypothetical protein, conserved | location=LmxM.05:392659-394227(+) | length=1569 | sequence_SO=chromosome |	1569
LmxM.05.1070a | organism=Leishmania_mexicana_MHOM/GT/2001/U1103 | product=unspecified product | location=LmxM.00:362643-364475(+) | length=1833 | sequence_SO=random_sequence | mapping	1830	1193	259	934	64.0589	LmxM.05.1070a | organism=Leishmania_mexicana_MHOM/GT/2001/U1103 | product=unspecified product | location=LmxM.00:362643-364475(+) | length=1833 | sequence_SO=random_sequence |	1833
LmxM.05.1080 | organism=Leishmania_mexicana_MHOM/GT/2001/U1103 | product=hypothetical protein, conserved | location=LmxM.05:395662-397842(+) | length=2181 | sequence_SO=chromosome | mapping	2181	1894	246	1648	84.9624	LmxM.05.1080 | organism=Leishmania_mexicana_MHOM/GT/2001/U1103 | product=hypothetical protein, conserved | location=LmxM.05:395662-397842(+) | length=2181 | sequence_SO=chromosome |	2181
LmxM.05.1080a | organism=Leishmania_mexicana_MHOM/GT/2001/U1103 | product=unspecified product | location=LmxM.00:365913-366407(+) | length=495 | sequence_SO=random_sequence | mapping	492	126	76	50	24.6364	LmxM.05.1080a | organism=Leishmania_mexicana_MHOM/GT/2001/U1103 | product=unspecified product | location=LmxM.00:365913-366407(+) | length=495 | sequence_SO=random_sequence |	495
LmxM.05.1090 | organism=Leishmania_mexicana_MHOM/GT/2001/U1103 | product=double-strand-break repair protein rad21 homolog, putative | location=LmxM.05:400494-402218(+) | length=1725 | sequence_SO=chromosome | mapping	1725	1678	306	1372	95.1078	LmxM.05.1090 | organism=Leishmania_mexicana_MHOM/GT/2001/U1103 | product=double-strand-break repair protein rad21 homolog, putative | location=LmxM.05:400494-402218(+) | length=1725 | sequence_SO=chromosome |	1725
LmxM.05.1100 | organism=Leishmania_mexicana_MHOM/GT/2001/U1103 | product=hypothetical protein, conserved | location=LmxM.05:405051-405788(+) | length=738 | sequence_SO=chromosome | mapping	738	734	352	382	97.126	LmxM.05.1100 | organism=Leishmania_mexicana_MHOM/GT/2001/U1103 | product=hypothetical protein, conserved | location=LmxM.05:405051-405788(+) | length=738 | sequence_SO=chromosome |	738
LmxM.05.1110 | organism=Leishmania_mexicana_MHOM/GT/2001/U1103 | product=hypothetical protein, conserved | location=LmxM.05:409244-412981(+) | length=3738 | sequence_SO=chromosome | mapping	3738	3707	337	3370	97.4353	LmxM.05.1110 | organism=Leishmania_mexicana_MHOM/GT/2001/U1103 | product=hypothetical protein, conserved | location=LmxM.05:409244-412981(+) | length=3738 | sequence_SO=chromosome |	3738
LmxM.05.1120 | organism=Leishmania_mexicana_MHOM/GT/2001/U1103 | product=hypothetical protein, unknown function | location=LmxM.05:416176-416517(+) | length=342 | sequence_SO=chromosome | mapping	342	377	341	36	104.965	LmxM.05.1120 | organism=Leishmania_mexicana_MHOM/GT/2001/U1103 | product=hypothetical protein, unknown function | location=LmxM.05:416176-416517(+) | length=342 | sequence_SO=chromosome |	342
LmxM.05.1130 | organism=Leishmania_mexicana_MHOM/GT/2001/U1103 | product=hypothetical protein, conserved | location=LmxM.05:419461-421146(-) | length=1686 | sequence_SO=chromosome | mapping	1686	1678	308	1370	97.4282	LmxM.05.1130 | organism=Leishmania_mexicana_MHOM/GT/2001/U1103 | product=hypothetical protein, conserved | location=LmxM.05:419461-421146(-) | length=1686 | sequence_SO=chromosome |	1686
LmxM.05.1140 | organism=Leishmania_mexicana_MHOM/GT/2001/U1103 | product=vacuolar ATPase subunit-like protein | location=LmxM.05:421704-422777(-) | length=1074 | sequence_SO=chromosome | mapping	1074	1170	290	880	106.854	LmxM.05.1140 | organism=Leishmania_mexicana_MHOM/GT/2001/U1103 | product=vacuolar ATPase subunit-like protein | location=LmxM.05:421704-422777(-) | length=1074 | sequence_SO=chromosome |	1074
LmxM.05.1160 | organism=Leishmania_mexicana_MHOM/GT/2001/U1103 | product=hypothetical protein, unknown function | location=LmxM.05:423449-426016(-) | length=2568 | sequence_SO=chromosome | mapping	2568	2594	322	2272	99.3427	LmxM.05.1160 | organism=Leishmania_mexicana_MHOM/GT/2001/U1103 | product=hypothetical protein, unknown function | location=LmxM.05:423449-426016(-) | length=2568 | sequence_SO=chromosome |	2568
LmxM.05.1170 | organism=Leishmania_mexicana_MHOM/GT/2001/U1103 | product=elongation of very long chain fatty acids protein, putative | location=LmxM.05:428287-429036(-) | length=750 | sequence_SO=chromosome | mapping	750	744	290	454	96.364	LmxM.05.1170 | organism=Leishmania_mexicana_MHOM/GT/2001/U1103 | product=elongation of very long chain fatty acids protein, putative | location=LmxM.05:428287-429036(-) | length=750 | sequence_SO=chromosome |	750
LmxM.05.1180 | organism=Leishmania_mexicana_MHOM/GT/2001/U1103 | product=hypothetical protein, conserved | location=LmxM.05:429631-431007(-) | length=1377 | sequence_SO=chromosome | mapping	1377	1528	348	1180	108.613	LmxM.05.1180 | organism=Leishmania_mexicana_MHOM/GT/2001/U1103 | product=hypothetical protein, conserved | location=LmxM.05:429631-431007(-) | length=1377 | sequence_SO=chromosome |	1377
LmxM.05.1190 | organism=Leishmania_mexicana_MHOM/GT/2001/U1103 | product=hypothetical protein, conserved | location=LmxM.05:432537-438410(-) | length=5874 | sequence_SO=chromosome | mapping	5874	6293	399	5894	105.799	LmxM.05.1190 | organism=Leishmania_mexicana_MHOM/GT/2001/U1103 | product=hypothetical protein, conserved | location=LmxM.05:432537-438410(-) | length=5874 | sequence_SO=chromosome |	5874
LmxM.05.1200 | organism=Leishmania_mexicana_MHOM/GT/2001/U1103 | product=prefoldin subunit, putative | location=LmxM.05:438767-439165(-) | length=399 | sequence_SO=chromosome | mapping	399	535	435	100	128.769	LmxM.05.1200 | organism=Leishmania_mexicana_MHOM/GT/2001/U1103 | product=prefoldin subunit, putative | location=LmxM.05:438767-439165(-) | length=399 | sequence_SO=chromosome |	399
LmxM.05.1210 | organism=Leishmania_mexicana_MHOM/GT/2001/U1103 | product=protein phosphatase type 1 regulator-like protein | location=LmxM.05:440120-441310(-) | length=1191 | sequence_SO=chromosome | mapping	1191	1386	370	1016	114.389	LmxM.05.1210 | organism=Leishmania_mexicana_MHOM/GT/2001/U1103 | product=protein phosphatase type 1 regulator-like protein | location=LmxM.05:440120-441310(-) | length=1191 | sequence_SO=chromosome |	1191
LmxM.05.1215 | organism=Leishmania_mexicana_MHOM/GT/2001/U1103 | product=surface antigen-like protein | location=LmxM.05:443710-444564(+) | length=855 | sequence_SO=chromosome | mapping	855	1023	419	604	116.892	LmxM.05.1215 | organism=Leishmania_mexicana_MHOM/GT/2001/U1103 | product=surface antigen-like protein | location=LmxM.05:443710-444564(+) | length=855 | sequence_SO=chromosome |	855
LmxM.06.0010 | organism=Leishmania_mexicana_MHOM/GT/2001/U1103 | product=histone H4 | location=LmxM.06:4008-4310(-) | length=303 | sequence_SO=chromosome | mapping	303	376	358	18	114.165	LmxM.06.0010 | organism=Leishmania_mexicana_MHOM/GT/2001/U1103 | product=histone H4 | location=LmxM.06:4008-4310(-) | length=303 | sequence_SO=chromosome |	303
LmxM.06.0020 | organism=Leishmania_mexicana_MHOM/GT/2001/U1103 | product=hypothetical protein, conserved | location=LmxM.06:6423-8030(-) | length=1608 | sequence_SO=chromosome | mapping	1608	1622	336	1286	99.385	LmxM.06.0020 | organism=Leishmania_mexicana_MHOM/GT/2001/U1103 | product=hypothetical protein, conserved | location=LmxM.06:6423-8030(-) | length=1608 | sequence_SO=chromosome |	1608
LmxM.06.0030 | organism=Leishmania_mexicana_MHOM/GT/2001/U1103 | product=hypothetical protein, conserved | location=LmxM.06:13674-15695(-) | length=2022 | sequence_SO=chromosome | mapping	2022	1958	314	1644	94.9629	LmxM.06.0030 | organism=Leishmania_mexicana_MHOM/GT/2001/U1103 | product=hypothetical protein, conserved | location=LmxM.06:13674-15695(-) | length=2022 | sequence_SO=chromosome |	2022
LmxM.06.0040 | organism=Leishmania_mexicana_MHOM/GT/2001/U1103 | product=hypothetical protein, conserved | location=LmxM.06:16560-17435(-) | length=876 | sequence_SO=chromosome | mapping	876	815	321	494	90.6027	LmxM.06.0040 | organism=Leishmania_mexicana_MHOM/GT/2001/U1103 | product=hypothetical protein, conserved | location=LmxM.06:16560-17435(-) | length=876 | sequence_SO=chromosome |	876
LmxM.06.0050 | organism=Leishmania_mexicana_MHOM/GT/2001/U1103 | product=hypothetical protein, conserved | location=LmxM.06:23001-24413(-) | length=1413 | sequence_SO=chromosome | mapping	1413	1475	335	1140	102.03	LmxM.06.0050 | organism=Leishmania_mexicana_MHOM/GT/2001/U1103 | product=hypothetical protein, conserved | location=LmxM.06:23001-24413(-) | length=1413 | sequence_SO=chromosome |	1413
LmxM.06.0060 | organism=Leishmania_mexicana_MHOM/GT/2001/U1103 | product=hypothetical protein, conserved | location=LmxM.06:27997-28962(-) | length=966 | sequence_SO=chromosome | mapping	966	932	370	562	93.6584	LmxM.06.0060 | organism=Leishmania_mexicana_MHOM/GT/2001/U1103 | product=hypothetical protein, conserved | location=LmxM.06:27997-28962(-) | length=966 | sequence_SO=chromosome |	966
LmxM.06.0070 | organism=Leishmania_mexicana_MHOM/GT/2001/U1103 | product=hypothetical protein, conserved | location=LmxM.06:30588-31967(-) | length=1380 | sequence_SO=chromosome | mapping	1377	1324	348	976	93.9681	LmxM.06.0070 | organism=Leishmania_mexicana_MHOM/GT/2001/U1103 | product=hypothetical protein, conserved | location=LmxM.06:30588-31967(-) | length=1380 | sequence_SO=chromosome |	1380
LmxM.06.0080 | organism=Leishmania_mexicana_MHOM/GT/2001/U1103 | product=ATP-binding cassette protein subfamily G, member 1, putative (ABCG1) | location=LmxM.06:35714-37687(-) | length=1974 | sequence_SO=chromosome | mapping	1974	2214	446	1768	109.887	LmxM.06.0080 | organism=Leishmania_mexicana_MHOM/GT/2001/U1103 | product=ATP-binding cassette protein subfamily G, member 1, putative (ABCG1) | location=LmxM.06:35714-37687(-) | length=1974 | sequence_SO=chromosome |	1974
LmxM.06.0090 | organism=Leishmania_mexicana_MHOM/GT/2001/U1103 | product=ATP-binding cassette protein subfamily G, member 2, putative (ABCG2) | location=LmxM.06:41063-43054(-) | length=1992 | sequence_SO=chromosome | mapping	1992	2202	430	1772	108.432	LmxM.06.0090 | organism=Leishmania_mexicana_MHOM/GT/2001/U1103 | product=ATP-binding cassette protein subfamily G, member 2, putative (ABCG2) | location=LmxM.06:41063-43054(-) | length=1992 | sequence_SO=chromosome |	1992
LmxM.06.0100 | organism=Leishmania_mexicana_MHOM/GT/2001/U1103 | product=ATP-binding cassette protein subfamily G, member 3, putative (ABCG3) | location=LmxM.06:44000-44746(-) | length=747 | sequence_SO=chromosome | mapping	747	582	248	334	76.1151	LmxM.06.0100 | organism=Leishmania_mexicana_MHOM/GT/2001/U1103 | product=ATP-binding cassette protein subfamily G, member 3, putative (ABCG3) | location=LmxM.06:44000-44746(-) | length=747 | sequence_SO=chromosome |	747
LmxM.06.0110 | organism=Leishmania_mexicana_MHOM/GT/2001/U1103 | product=hypothetical protein, conserved | location=LmxM.06:46394-48202(-) | length=1809 | sequence_SO=chromosome | mapping	1809	1868	344	1524	100.983	LmxM.06.0110 | organism=Leishmania_mexicana_MHOM/GT/2001/U1103 | product=hypothetical protein, conserved | location=LmxM.06:46394-48202(-) | length=1809 | sequence_SO=chromosome |	1809
LmxM.06.0120 | organism=Leishmania_mexicana_MHOM/GT/2001/U1103 | product=cyclophilin | location=LmxM.06:49548-50111(-) | length=564 | sequence_SO=chromosome | mapping	564	619	377	242	105.986	LmxM.06.0120 | organism=Leishmania_mexicana_MHOM/GT/2001/U1103 | product=cyclophilin | location=LmxM.06:49548-50111(-) | length=564 | sequence_SO=chromosome |	564
LmxM.06.0130 | organism=Leishmania_mexicana_MHOM/GT/2001/U1103 | product=hypothetical protein, conserved | location=LmxM.06:51057-51617(-) | length=561 | sequence_SO=chromosome | mapping	561	510	328	182	88.6667	LmxM.06.0130 | organism=Leishmania_mexicana_MHOM/GT/2001/U1103 | product=hypothetical protein, conserved | location=LmxM.06:51057-51617(-) | length=561 | sequence_SO=chromosome |	561
LmxM.06.0140 | organism=Leishmania_mexicana_MHOM/GT/2001/U1103 | product=proteasome beta 6 subunit, putative,20S proteasome beta 6 subunit, putative | location=LmxM.06:53128-53871(-) | length=744 | sequence_SO=chromosome | mapping	744	765	263	502	99.7742	LmxM.06.0140 | organism=Leishmania_mexicana_MHOM/GT/2001/U1103 | product=proteasome beta 6 subunit, putative,20S proteasome beta 6 subunit, putative | location=LmxM.06:53128-53871(-) | length=744 | sequence_SO=chromosome |	744
LmxM.06.0150 | organism=Leishmania_mexicana_MHOM/GT/2001/U1103 | product=hypothetical protein, conserved | location=LmxM.06:54624-54953(-) | length=330 | sequence_SO=chromosome | mapping	330	358	324	34	103.173	LmxM.06.0150 | organism=Leishmania_mexicana_MHOM/GT/2001/U1103 | product=hypothetical protein, conserved | location=LmxM.06:54624-54953(-) | length=330 | sequence_SO=chromosome |	330
LmxM.06.0160 | organism=Leishmania_mexicana_MHOM/GT/2001/U1103 | product=hypothetical protein, conserved | location=LmxM.06:55549-56913(-) | length=1365 | sequence_SO=chromosome | mapping	1365	1384	320	1064	99.0711	LmxM.06.0160 | organism=Leishmania_mexicana_MHOM/GT/2001/U1103 | product=hypothetical protein, conserved | location=LmxM.06:55549-56913(-) | length=1365 | sequence_SO=chromosome |	1365
LmxM.06.0170 | organism=Leishmania_mexicana_MHOM/GT/2001/U1103 | product=hypothetical protein, conserved | location=LmxM.06:58226-58651(-) | length=426 | sequence_SO=chromosome | mapping	426	424	312	112	95.1432	LmxM.06.0170 | organism=Leishmania_mexicana_MHOM/GT/2001/U1103 | product=hypothetical protein, conserved | location=LmxM.06:58226-58651(-) | length=426 | sequence_SO=chromosome |	426
LmxM.06.0180 | organism=Leishmania_mexicana_MHOM/GT/2001/U1103 | product=kinesin-like protein | location=LmxM.06:59183-61171(-) | length=1989 | sequence_SO=chromosome | mapping	1989	1975	353	1622	97.4525	LmxM.06.0180 | organism=Leishmania_mexicana_MHOM/GT/2001/U1103 | product=kinesin-like protein | location=LmxM.06:59183-61171(-) | length=1989 | sequence_SO=chromosome |	1989
LmxM.06.0190 | organism=Leishmania_mexicana_MHOM/GT/2001/U1103 | product=hypothetical protein, conserved | location=LmxM.06:62727-64490(-) | length=1764 | sequence_SO=chromosome | mapping	1764	1702	336	1366	94.8917	LmxM.06.0190 | organism=Leishmania_mexicana_MHOM/GT/2001/U1103 | product=hypothetical protein, conserved | location=LmxM.06:62727-64490(-) | length=1764 | sequence_SO=chromosome |	1764
LmxM.06.0200 | organism=Leishmania_mexicana_MHOM/GT/2001/U1103 | product=hypothetical protein, conserved | location=LmxM.06:66358-67833(-) | length=1476 | sequence_SO=chromosome | mapping	1476	1644	330	1314	109.485	LmxM.06.0200 | organism=Leishmania_mexicana_MHOM/GT/2001/U1103 | product=hypothetical protein, conserved | location=LmxM.06:66358-67833(-) | length=1476 | sequence_SO=chromosome |	1476
LmxM.06.0210 | organism=Leishmania_mexicana_MHOM/GT/2001/U1103 | product=hypothetical protein, conserved | location=LmxM.06:70347-72374(-) | length=2028 | sequence_SO=chromosome | mapping	2028	2030	344	1686	98.2288	LmxM.06.0210 | organism=Leishmania_mexicana_MHOM/GT/2001/U1103 | product=hypothetical protein, conserved | location=LmxM.06:70347-72374(-) | length=2028 | sequence_SO=chromosome |	2028
LmxM.06.0220 | organism=Leishmania_mexicana_MHOM/GT/2001/U1103 | product=hypothetical protein, conserved | location=LmxM.06:73195-74055(-) | length=861 | sequence_SO=chromosome | mapping	861	855	337	518	96.7352	LmxM.06.0220 | organism=Leishmania_mexicana_MHOM/GT/2001/U1103 | product=hypothetical protein, conserved | location=LmxM.06:73195-74055(-) | length=861 | sequence_SO=chromosome |	861
LmxM.06.0230 | organism=Leishmania_mexicana_MHOM/GT/2001/U1103 | product=hypothetical protein, conserved | location=LmxM.06:74708-75682(-) | length=975 | sequence_SO=chromosome | mapping	975	839	291	548	83.0226	LmxM.06.0230 | organism=Leishmania_mexicana_MHOM/GT/2001/U1103 | product=hypothetical protein, conserved | location=LmxM.06:74708-75682(-) | length=975 | sequence_SO=chromosome |	975
LmxM.06.0240 | organism=Leishmania_mexicana_MHOM/GT/2001/U1103 | product=hypothetical protein, conserved | location=LmxM.06:76416-78821(-) | length=2406 | sequence_SO=chromosome | mapping	2406	2343	297	2046	95.6692	LmxM.06.0240 | organism=Leishmania_mexicana_MHOM/GT/2001/U1103 | product=hypothetical protein, conserved | location=LmxM.06:76416-78821(-) | length=2406 | sequence_SO=chromosome |	2406
LmxM.06.0250 | organism=Leishmania_mexicana_MHOM/GT/2001/U1103 | product=hypothetical protein, conserved | location=LmxM.06:80490-81326(-) | length=837 | sequence_SO=chromosome | mapping	837	806	296	510	92.8554	LmxM.06.0250 | organism=Leishmania_mexicana_MHOM/GT/2001/U1103 | product=hypothetical protein, conserved | location=LmxM.06:80490-81326(-) | length=837 | sequence_SO=chromosome |	837
LmxM.06.0260 | organism=Leishmania_mexicana_MHOM/GT/2001/U1103 | product=5'-3' exonuclease, putative | location=LmxM.06:82866-87449(-) | length=4584 | sequence_SO=chromosome | mapping	4584	4745	325	4420	102.147	LmxM.06.0260 | organism=Leishmania_mexicana_MHOM/GT/2001/U1103 | product=5'-3' exonuclease, putative | location=LmxM.06:82866-87449(-) | length=4584 | sequence_SO=chromosome |	4584
LmxM.06.0270 | organism=Leishmania_mexicana_MHOM/GT/2001/U1103 | product=hypothetical protein, conserved | location=LmxM.06:89835-90773(-) | length=939 | sequence_SO=chromosome | mapping	939	873	317	556	90.2854	LmxM.06.0270 | organism=Leishmania_mexicana_MHOM/GT/2001/U1103 | product=hypothetical protein, conserved | location=LmxM.06:89835-90773(-) | length=939 | sequence_SO=chromosome |	939
LmxM.06.0280 | organism=Leishmania_mexicana_MHOM/GT/2001/U1103 | product=hypothetical protein, conserved | location=LmxM.06:91451-94006(-) | length=2556 | sequence_SO=chromosome | mapping	2556	2543	323	2220	97.6933	LmxM.06.0280 | organism=Leishmania_mexicana_MHOM/GT/2001/U1103 | product=hypothetical protein, conserved | location=LmxM.06:91451-94006(-) | length=2556 | sequence_SO=chromosome |	2556
LmxM.06.0290 | organism=Leishmania_mexicana_MHOM/GT/2001/U1103 | product=ribonuclease H1, putative | location=LmxM.06:96184-96936(-) | length=753 | sequence_SO=chromosome | mapping	753	681	289	392	87.17	LmxM.06.0290 | organism=Leishmania_mexicana_MHOM/GT/2001/U1103 | product=ribonuclease H1, putative | location=LmxM.06:96184-96936(-) | length=753 | sequence_SO=chromosome |	753
LmxM.06.0300 | organism=Leishmania_mexicana_MHOM/GT/2001/U1103 | product=MYND finger domain-like protein | location=LmxM.06:99179-99688(-) | length=510 | sequence_SO=chromosome | mapping	510	471	251	220	88.3529	LmxM.06.0300 | organism=Leishmania_mexicana_MHOM/GT/2001/U1103 | product=MYND finger domain-like protein | location=LmxM.06:99179-99688(-) | length=510 | sequence_SO=chromosome |	510
LmxM.06.0310 | organism=Leishmania_mexicana_MHOM/GT/2001/U1103 | product=pteridine transporter, putative | location=LmxM.06:102933-104966(-) | length=2034 | sequence_SO=chromosome | mapping	2034	2015	323	1692	97.3633	LmxM.06.0310 | organism=Leishmania_mexicana_MHOM/GT/2001/U1103 | product=pteridine transporter, putative | location=LmxM.06:102933-104966(-) | length=2034 | sequence_SO=chromosome |	2034
LmxM.06.0320 | organism=Leishmania_mexicana_MHOM/GT/2001/U1103 | product=hypothetical protein, conserved | location=LmxM.06:105854-108967(-) | length=3114 | sequence_SO=chromosome | mapping	3114	3101	371	2730	97.8443	LmxM.06.0320 | organism=Leishmania_mexicana_MHOM/GT/2001/U1103 | product=hypothetical protein, conserved | location=LmxM.06:105854-108967(-) | length=3114 | sequence_SO=chromosome |	3114
LmxM.06.0330 | organism=Leishmania_mexicana_MHOM/GT/2001/U1103 | product=hypothetical protein, conserved | location=LmxM.06:110303-113860(-) | length=3558 | sequence_SO=chromosome | mapping	3558	3530	358	3172	97.8926	LmxM.06.0330 | organism=Leishmania_mexicana_MHOM/GT/2001/U1103 | product=hypothetical protein, conserved | location=LmxM.06:110303-113860(-) | length=3558 | sequence_SO=chromosome |	3558
LmxM.06.0340 | organism=Leishmania_mexicana_MHOM/GT/2001/U1103 | product=oligopeptidase B-like protein,serine peptidase, clan SC, family S9A-like protein | location=LmxM.06:114598-117315(-) | length=2718 | sequence_SO=chromosome | mapping	2718	2806	378	2428	101.558	LmxM.06.0340 | organism=Leishmania_mexicana_MHOM/GT/2001/U1103 | product=oligopeptidase B-like protein,serine peptidase, clan SC, family S9A-like protein | location=LmxM.06:114598-117315(-) | length=2718 | sequence_SO=chromosome |	2718
LmxM.06.0350 | organism=Leishmania_mexicana_MHOM/GT/2001/U1103 | product=NAD(P)-dependent steroid dehydrogenase protein, putative | location=LmxM.06:118082-119173(-) | length=1092 | sequence_SO=chromosome | mapping	1092	1176	350	826	105.152	LmxM.06.0350 | organism=Leishmania_mexicana_MHOM/GT/2001/U1103 | product=NAD(P)-dependent steroid dehydrogenase protein, putative | location=LmxM.06:118082-119173(-) | length=1092 | sequence_SO=chromosome |	1092
LmxM.06.0360 | organism=Leishmania_mexicana_MHOM/GT/2001/U1103 | product=hypothetical protein, conserved | location=LmxM.06:119906-121261(-) | length=1356 | sequence_SO=chromosome | mapping	1356	1612	450	1162	116.378	LmxM.06.0360 | organism=Leishmania_mexicana_MHOM/GT/2001/U1103 | product=hypothetical protein, conserved | location=LmxM.06:119906-121261(-) | length=1356 | sequence_SO=chromosome |	1356
LmxM.06.0370 | organism=Leishmania_mexicana_MHOM/GT/2001/U1103 | product=glutamine synthetase, putative | location=LmxM.06:125908-127047(+) | length=1140 | sequence_SO=chromosome | mapping	1140	1261	363	898	108.404	LmxM.06.0370 | organism=Leishmania_mexicana_MHOM/GT/2001/U1103 | product=glutamine synthetase, putative | location=LmxM.06:125908-127047(+) | length=1140 | sequence_SO=chromosome |	1140
LmxM.06.0380 | organism=Leishmania_mexicana_MHOM/GT/2001/U1103 | product=hypothetical protein, conserved | location=LmxM.06:127922-129046(+) | length=1125 | sequence_SO=chromosome | mapping	1125	1239	393	846	107.757	LmxM.06.0380 | organism=Leishmania_mexicana_MHOM/GT/2001/U1103 | product=hypothetical protein, conserved | location=LmxM.06:127922-129046(+) | length=1125 | sequence_SO=chromosome |	1125
LmxM.06.0390 | organism=Leishmania_mexicana_MHOM/GT/2001/U1103 | product=hypothetical protein, conserved | location=LmxM.06:130023-132758(+) | length=2736 | sequence_SO=chromosome | mapping	2736	2882	344	2538	103.545	LmxM.06.0390 | organism=Leishmania_mexicana_MHOM/GT/2001/U1103 | product=hypothetical protein, conserved | location=LmxM.06:130023-132758(+) | length=2736 | sequence_SO=chromosome |	2736
LmxM.06.0400 | organism=Leishmania_mexicana_MHOM/GT/2001/U1103 | product=unspecified product | location=LmxM.06:133331-134275(+) | length=945 | sequence_SO=chromosome | mapping	945	957	311	646	99.3841	LmxM.06.0400 | organism=Leishmania_mexicana_MHOM/GT/2001/U1103 | product=unspecified product | location=LmxM.06:133331-134275(+) | length=945 | sequence_SO=chromosome |	945
LmxM.06.0410 | organism=Leishmania_mexicana_MHOM/GT/2001/U1103 | product=60S ribosomal protein L19, putative | location=LmxM.06:136017-136760(+) | length=744 | sequence_SO=chromosome | mapping	744	717	309	408	94.3038	LmxM.06.0410 | organism=Leishmania_mexicana_MHOM/GT/2001/U1103 | product=60S ribosomal protein L19, putative | location=LmxM.06:136017-136760(+) | length=744 | sequence_SO=chromosome |	744
LmxM.06.0412 | organism=Leishmania_mexicana_MHOM/GT/2001/U1103 | product=hypothetical protein, conserved | location=LmxM.06:138118-138687(+) | length=570 | sequence_SO=chromosome | mapping	570	583	337	246	98.4456	LmxM.06.0412 | organism=Leishmania_mexicana_MHOM/GT/2001/U1103 | product=hypothetical protein, conserved | location=LmxM.06:138118-138687(+) | length=570 | sequence_SO=chromosome |	570
LmxM.06.0415 | organism=Leishmania_mexicana_MHOM/GT/2001/U1103 | product=60S ribosomal protein L19, putative | location=LmxM.06:139489-140232(+) | length=744 | sequence_SO=chromosome | mapping	744	688	310	378	90.0954	LmxM.06.0415 | organism=Leishmania_mexicana_MHOM/GT/2001/U1103 | product=60S ribosomal protein L19, putative | location=LmxM.06:139489-140232(+) | length=744 | sequence_SO=chromosome |	744
LmxM.06.0420 | organism=Leishmania_mexicana_MHOM/GT/2001/U1103 | product=hypothetical protein, conserved | location=LmxM.06:142401-144083(+) | length=1683 | sequence_SO=chromosome | mapping	1683	1620	298	1322	93.8746	LmxM.06.0420 | organism=Leishmania_mexicana_MHOM/GT/2001/U1103 | product=hypothetical protein, conserved | location=LmxM.06:142401-144083(+) | length=1683 | sequence_SO=chromosome |	1683
LmxM.06.0430 | organism=Leishmania_mexicana_MHOM/GT/2001/U1103 | product=hypothetical protein, conserved | location=LmxM.06:145671-147746(+) | length=2076 | sequence_SO=chromosome | mapping	2076	2026	328	1698	96.1305	LmxM.06.0430 | organism=Leishmania_mexicana_MHOM/GT/2001/U1103 | product=hypothetical protein, conserved | location=LmxM.06:145671-147746(+) | length=2076 | sequence_SO=chromosome |	2076
LmxM.06.0440 | organism=Leishmania_mexicana_MHOM/GT/2001/U1103 | product=hypothetical protein, conserved | location=LmxM.06:148986-151967(+) | length=2982 | sequence_SO=chromosome | mapping	2982	3151	341	2810	104.057	LmxM.06.0440 | organism=Leishmania_mexicana_MHOM/GT/2001/U1103 | product=hypothetical protein, conserved | location=LmxM.06:148986-151967(+) | length=2982 | sequence_SO=chromosome |	2982
LmxM.06.0450 | organism=Leishmania_mexicana_MHOM/GT/2001/U1103 | product=hypothetical protein, unknown function | location=LmxM.06:153798-155165(+) | length=1368 | sequence_SO=chromosome | mapping	1368	1176	206	970	83.8889	LmxM.06.0450 | organism=Leishmania_mexicana_MHOM/GT/2001/U1103 | product=hypothetical protein, unknown function | location=LmxM.06:153798-155165(+) | length=1368 | sequence_SO=chromosome |	1368
LmxM.06.0460 | organism=Leishmania_mexicana_MHOM/GT/2001/U1103 | product=ATP-NAD kinase-like protein | location=LmxM.06:157430-161179(+) | length=3750 | sequence_SO=chromosome | mapping	3753	3726	314	3412	97.5501	LmxM.06.0460 | organism=Leishmania_mexicana_MHOM/GT/2001/U1103 | product=ATP-NAD kinase-like protein | location=LmxM.06:157430-161179(+) | length=3750 | sequence_SO=chromosome |	3750
LmxM.06.0470 | organism=Leishmania_mexicana_MHOM/GT/2001/U1103 | product=hypothetical protein, conserved | location=LmxM.06:162411-165863(+) | length=3453 | sequence_SO=chromosome | mapping	3453	3438	346	3092	97.8427	LmxM.06.0470 | organism=Leishmania_mexicana_MHOM/GT/2001/U1103 | product=hypothetical protein, conserved | location=LmxM.06:162411-165863(+) | length=3453 | sequence_SO=chromosome |	3453
LmxM.06.0480 | organism=Leishmania_mexicana_MHOM/GT/2001/U1103 | product=hypothetical protein, conserved | location=LmxM.06:166661-167605(+) | length=945 | sequence_SO=chromosome | mapping	945	995	343	652	102.418	LmxM.06.0480 | organism=Leishmania_mexicana_MHOM/GT/2001/U1103 | product=hypothetical protein, conserved | location=LmxM.06:166661-167605(+) | length=945 | sequence_SO=chromosome |	945
LmxM.06.0490 | organism=Leishmania_mexicana_MHOM/GT/2001/U1103 | product=hypothetical protein, conserved | location=LmxM.06:168784-170244(+) | length=1461 | sequence_SO=chromosome | mapping	1461	1540	354	1186	103.52	LmxM.06.0490 | organism=Leishmania_mexicana_MHOM/GT/2001/U1103 | product=hypothetical protein, conserved | location=LmxM.06:168784-170244(+) | length=1461 | sequence_SO=chromosome |	1461
LmxM.06.0500 | organism=Leishmania_mexicana_MHOM/GT/2001/U1103 | product=hypothetical protein, conserved | location=LmxM.06:171452-173089(+) | length=1638 | sequence_SO=chromosome | mapping	1638	1614	286	1328	96.5024	LmxM.06.0500 | organism=Leishmania_mexicana_MHOM/GT/2001/U1103 | product=hypothetical protein, conserved | location=LmxM.06:171452-173089(+) | length=1638 | sequence_SO=chromosome |	1638
LmxM.06.0510 | organism=Leishmania_mexicana_MHOM/GT/2001/U1103 | product=hypothetical protein, unknown function | location=LmxM.06:173863-175860(+) | length=1998 | sequence_SO=chromosome | mapping	1998	2039	315	1724	99.956	LmxM.06.0510 | organism=Leishmania_mexicana_MHOM/GT/2001/U1103 | product=hypothetical protein, unknown function | location=LmxM.06:173863-175860(+) | length=1998 | sequence_SO=chromosome |	1998
LmxM.06.0520 | organism=Leishmania_mexicana_MHOM/GT/2001/U1103 | product=hypothetical protein, conserved | location=LmxM.06:177331-183027(+) | length=5697 | sequence_SO=chromosome | mapping	5697	5759	339	5420	99.3971	LmxM.06.0520 | organism=Leishmania_mexicana_MHOM/GT/2001/U1103 | product=hypothetical protein, conserved | location=LmxM.06:177331-183027(+) | length=5697 | sequence_SO=chromosome |	5697
LmxM.06.0530 | organism=Leishmania_mexicana_MHOM/GT/2001/U1103 | product=hypothetical protein, conserved | location=LmxM.06:183680-184573(+) | length=894 | sequence_SO=chromosome | mapping	897	802	298	504	87.1834	LmxM.06.0530 | organism=Leishmania_mexicana_MHOM/GT/2001/U1103 | product=hypothetical protein, conserved | location=LmxM.06:183680-184573(+) | length=894 | sequence_SO=chromosome |	894
LmxM.06.0540 | organism=Leishmania_mexicana_MHOM/GT/2001/U1103 | product=hypothetical protein, conserved | location=LmxM.06:186354-188474(+) | length=2121 | sequence_SO=chromosome | mapping	2121	2145	351	1794	98.8425	LmxM.06.0540 | organism=Leishmania_mexicana_MHOM/GT/2001/U1103 | product=hypothetical protein, conserved | location=LmxM.06:186354-188474(+) | length=2121 | sequence_SO=chromosome |	2121
LmxM.06.0550 | organism=Leishmania_mexicana_MHOM/GT/2001/U1103 | product=hypothetical protein, conserved | location=LmxM.06:189388-194571(+) | length=5184 | sequence_SO=chromosome | mapping	5184	5148	312	4836	97.7188	LmxM.06.0550 | organism=Leishmania_mexicana_MHOM/GT/2001/U1103 | product=hypothetical protein, conserved | location=LmxM.06:189388-194571(+) | length=5184 | sequence_SO=chromosome |	5184
LmxM.06.0560 | organism=Leishmania_mexicana_MHOM/GT/2001/U1103 | product=deoxyuridine triphosphatase, putative,dUTP diphosphatase | location=LmxM.06:195545-196351(+) | length=807 | sequence_SO=chromosome | mapping	807	985	379	606	118.786	LmxM.06.0560 | organism=Leishmania_mexicana_MHOM/GT/2001/U1103 | product=deoxyuridine triphosphatase, putative,dUTP diphosphatase | location=LmxM.06:195545-196351(+) | length=807 | sequence_SO=chromosome |	807
LmxM.06.0570 | organism=Leishmania_mexicana_MHOM/GT/2001/U1103 | product=60S ribosomal protein L23a, putative | location=LmxM.06:197736-198173(+) | length=438 | sequence_SO=chromosome | mapping	438	392	314	78	84.847	LmxM.06.0570 | organism=Leishmania_mexicana_MHOM/GT/2001/U1103 | product=60S ribosomal protein L23a, putative | location=LmxM.06:197736-198173(+) | length=438 | sequence_SO=chromosome |	438
LmxM.06.0580 | organism=Leishmania_mexicana_MHOM/GT/2001/U1103 | product=60S ribosomal protein L23a, putative | location=LmxM.06:198630-199067(+) | length=438 | sequence_SO=chromosome | mapping	438	429	331	98	93.6963	LmxM.06.0580 | organism=Leishmania_mexicana_MHOM/GT/2001/U1103 | product=60S ribosomal protein L23a, putative | location=LmxM.06:198630-199067(+) | length=438 | sequence_SO=chromosome |	438
LmxM.06.0590 | organism=Leishmania_mexicana_MHOM/GT/2001/U1103 | product=hypothetical protein, conserved | location=LmxM.06:200581-205128(+) | length=4548 | sequence_SO=chromosome | mapping	4545	4629	357	4272	100.23	LmxM.06.0590 | organism=Leishmania_mexicana_MHOM/GT/2001/U1103 | product=hypothetical protein, conserved | location=LmxM.06:200581-205128(+) | length=4548 | sequence_SO=chromosome |	4548
LmxM.06.0600 | organism=Leishmania_mexicana_MHOM/GT/2001/U1103 | product=hypothetical protein, conserved | location=LmxM.06:205756-210063(+) | length=4308 | sequence_SO=chromosome | mapping	4308	4117	357	3760	94.2656	LmxM.06.0600 | organism=Leishmania_mexicana_MHOM/GT/2001/U1103 | product=hypothetical protein, conserved | location=LmxM.06:205756-210063(+) | length=4308 | sequence_SO=chromosome |	4308
LmxM.06.0610 | organism=Leishmania_mexicana_MHOM/GT/2001/U1103 | product=carbonic anhydrase family protein, putative | location=LmxM.06:211291-212211(+) | length=921 | sequence_SO=chromosome | mapping	921	931	289	642	98.7687	LmxM.06.0610 | organism=Leishmania_mexicana_MHOM/GT/2001/U1103 | product=carbonic anhydrase family protein, putative | location=LmxM.06:211291-212211(+) | length=921 | sequence_SO=chromosome |	921
LmxM.06.0620 | organism=Leishmania_mexicana_MHOM/GT/2001/U1103 | product=hypothetical protein, conserved | location=LmxM.06:213773-216805(+) | length=3033 | sequence_SO=chromosome | mapping	3033	2948	246	2702	95.6482	LmxM.06.0620 | organism=Leishmania_mexicana_MHOM/GT/2001/U1103 | product=hypothetical protein, conserved | location=LmxM.06:213773-216805(+) | length=3033 | sequence_SO=chromosome |	3033
LmxM.06.0630 | organism=Leishmania_mexicana_MHOM/GT/2001/U1103 | product=hypothetical protein, unknown function | location=LmxM.06:218152-219072(+) | length=921 | sequence_SO=chromosome | mapping	921	1005	325	680	105.988	LmxM.06.0630 | organism=Leishmania_mexicana_MHOM/GT/2001/U1103 | product=hypothetical protein, unknown function | location=LmxM.06:218152-219072(+) | length=921 | sequence_SO=chromosome |	921
LmxM.06.0640 | organism=Leishmania_mexicana_MHOM/GT/2001/U1103 | product=protein kinase, putative | location=LmxM.06:220144-229461(+) | length=9318 | sequence_SO=chromosome | mapping	9318	9341	393	8948	98.8375	LmxM.06.0640 | organism=Leishmania_mexicana_MHOM/GT/2001/U1103 | product=protein kinase, putative | location=LmxM.06:220144-229461(+) | length=9318 | sequence_SO=chromosome |	9318
LmxM.06.0650 | organism=Leishmania_mexicana_MHOM/GT/2001/U1103 | product=lanosterol synthase, putative | location=LmxM.06:230610-233618(+) | length=3009 | sequence_SO=chromosome | mapping	3009	2954	348	2606	96.1908	LmxM.06.0650 | organism=Leishmania_mexicana_MHOM/GT/2001/U1103 | product=lanosterol synthase, putative | location=LmxM.06:230610-233618(+) | length=3009 | sequence_SO=chromosome |	3009
LmxM.06.0660 | organism=Leishmania_mexicana_MHOM/GT/2001/U1103 | product=hypothetical protein, conserved | location=LmxM.06:235582-237486(+) | length=1905 | sequence_SO=chromosome | mapping	1905	1803	307	1496	93.0058	LmxM.06.0660 | organism=Leishmania_mexicana_MHOM/GT/2001/U1103 | product=hypothetical protein, conserved | location=LmxM.06:235582-237486(+) | length=1905 | sequence_SO=chromosome |	1905
LmxM.06.0670 | organism=Leishmania_mexicana_MHOM/GT/2001/U1103 | product=hypothetical protein, conserved | location=LmxM.06:240100-244098(+) | length=3999 | sequence_SO=chromosome | mapping	3999	3766	254	3512	92.6557	LmxM.06.0670 | organism=Leishmania_mexicana_MHOM/GT/2001/U1103 | product=hypothetical protein, conserved | location=LmxM.06:240100-244098(+) | length=3999 | sequence_SO=chromosome |	3999
LmxM.06.0680 | organism=Leishmania_mexicana_MHOM/GT/2001/U1103 | product=hypothetical protein, conserved | location=LmxM.06:245503-246234(+) | length=732 | sequence_SO=chromosome | mapping	732	724	290	434	96.3183	LmxM.06.0680 | organism=Leishmania_mexicana_MHOM/GT/2001/U1103 | product=hypothetical protein, conserved | location=LmxM.06:245503-246234(+) | length=732 | sequence_SO=chromosome |	732
LmxM.06.0685 | organism=Leishmania_mexicana_MHOM/GT/2001/U1103 | product=hypothetical protein, conserved | location=LmxM.06:246910-248127(+) | length=1218 | sequence_SO=chromosome | mapping	1218	1130	342	788	90.3695	LmxM.06.0685 | organism=Leishmania_mexicana_MHOM/GT/2001/U1103 | product=hypothetical protein, conserved | location=LmxM.06:246910-248127(+) | length=1218 | sequence_SO=chromosome |	1218
LmxM.06.0690 | organism=Leishmania_mexicana_MHOM/GT/2001/U1103 | product=hypothetical protein, conserved | location=LmxM.06:249269-256972(+) | length=7704 | sequence_SO=chromosome | mapping	7704	7596	408	7188	97.1389	LmxM.06.0690 | organism=Leishmania_mexicana_MHOM/GT/2001/U1103 | product=hypothetical protein, conserved | location=LmxM.06:249269-256972(+) | length=7704 | sequence_SO=chromosome |	7704
LmxM.06.0700 | organism=Leishmania_mexicana_MHOM/GT/2001/U1103 | product=hypothetical protein, conserved | location=LmxM.06:258030-260237(+) | length=2208 | sequence_SO=chromosome | mapping	2208	2101	283	1818	93.144	LmxM.06.0700 | organism=Leishmania_mexicana_MHOM/GT/2001/U1103 | product=hypothetical protein, conserved | location=LmxM.06:258030-260237(+) | length=2208 | sequence_SO=chromosome |	2208
LmxM.06.0710 | organism=Leishmania_mexicana_MHOM/GT/2001/U1103 | product=unspecified product | location=LmxM.06:265592-267433(+) | length=1842 | sequence_SO=chromosome | mapping	1843	1873	301	1572	99.1851	LmxM.06.0710 | organism=Leishmania_mexicana_MHOM/GT/2001/U1103 | product=unspecified product | location=LmxM.06:265592-267433(+) | length=1842 | sequence_SO=chromosome |	1842
LmxM.06.0720 | organism=Leishmania_mexicana_MHOM/GT/2001/U1103 | product=hypothetical protein, conserved | location=LmxM.06:268555-273825(+) | length=5271 | sequence_SO=chromosome | mapping	5271	5481	357	5124	102.444	LmxM.06.0720 | organism=Leishmania_mexicana_MHOM/GT/2001/U1103 | product=hypothetical protein, conserved | location=LmxM.06:268555-273825(+) | length=5271 | sequence_SO=chromosome |	5271
LmxM.06.0730 | organism=Leishmania_mexicana_MHOM/GT/2001/U1103 | product=threonine ammonia-lyase | location=LmxM.06:275140-276156(+) | length=1017 | sequence_SO=chromosome | mapping	1017	952	302	650	91.8604	LmxM.06.0730 | organism=Leishmania_mexicana_MHOM/GT/2001/U1103 | product=threonine ammonia-lyase | location=LmxM.06:275140-276156(+) | length=1017 | sequence_SO=chromosome |	1017
LmxM.06.0740 | organism=Leishmania_mexicana_MHOM/GT/2001/U1103 | product=hypothetical protein, conserved | location=LmxM.06:278219-281092(+) | length=2874 | sequence_SO=chromosome | mapping	2874	2681	309	2372	91.8142	LmxM.06.0740 | organism=Leishmania_mexicana_MHOM/GT/2001/U1103 | product=hypothetical protein, conserved | location=LmxM.06:278219-281092(+) | length=2874 | sequence_SO=chromosome |	2874
LmxM.06.0750 | organism=Leishmania_mexicana_MHOM/GT/2001/U1103 | product=hypothetical protein, conserved | location=LmxM.06:282081-284093(+) | length=2013 | sequence_SO=chromosome | mapping	2013	2044	314	1730	99.5092	LmxM.06.0750 | organism=Leishmania_mexicana_MHOM/GT/2001/U1103 | product=hypothetical protein, conserved | location=LmxM.06:282081-284093(+) | length=2013 | sequence_SO=chromosome |	2013
LmxM.06.0760 | organism=Leishmania_mexicana_MHOM/GT/2001/U1103 | product=hypothetical protein, conserved | location=LmxM.06:285196-288723(+) | length=3528 | sequence_SO=chromosome | mapping	3528	3545	345	3200	98.7253	LmxM.06.0760 | organism=Leishmania_mexicana_MHOM/GT/2001/U1103 | product=hypothetical protein, conserved | location=LmxM.06:285196-288723(+) | length=3528 | sequence_SO=chromosome |	3528
LmxM.06.0770 | organism=Leishmania_mexicana_MHOM/GT/2001/U1103 | product=RNA-binding protein-like protein | location=LmxM.06:292623-298382(+) | length=5760 | sequence_SO=chromosome | mapping	5760	5726	256	5470	97.8453	LmxM.06.0770 | organism=Leishmania_mexicana_MHOM/GT/2001/U1103 | product=RNA-binding protein-like protein | location=LmxM.06:292623-298382(+) | length=5760 | sequence_SO=chromosome |	5760
LmxM.06.0790 | organism=Leishmania_mexicana_MHOM/GT/2001/U1103 | product=hypothetical protein, unknown function | location=LmxM.06:302613-305708(+) | length=3096 | sequence_SO=chromosome | mapping	3096	3034	350	2684	96.1948	LmxM.06.0790 | organism=Leishmania_mexicana_MHOM/GT/2001/U1103 | product=hypothetical protein, unknown function | location=LmxM.06:302613-305708(+) | length=3096 | sequence_SO=chromosome |	3096
LmxM.06.0800 | organism=Leishmania_mexicana_MHOM/GT/2001/U1103 | product=hypothetical protein, conserved | location=LmxM.06:306543-311204(+) | length=4662 | sequence_SO=chromosome | mapping	4662	4670	338	4332	98.8404	LmxM.06.0800 | organism=Leishmania_mexicana_MHOM/GT/2001/U1103 | product=hypothetical protein, conserved | location=LmxM.06:306543-311204(+) | length=4662 | sequence_SO=chromosome |	4662
LmxM.06.0810 | organism=Leishmania_mexicana_MHOM/GT/2001/U1103 | product=hypothetical protein, unknown function | location=LmxM.06:313959-323768(+) | length=9810 | sequence_SO=chromosome | mapping	9810	9667	375	9292	97.2509	LmxM.06.0810 | organism=Leishmania_mexicana_MHOM/GT/2001/U1103 | product=hypothetical protein, unknown function | location=LmxM.06:313959-323768(+) | length=9810 | sequence_SO=chromosome |	9810
LmxM.06.0820 | organism=Leishmania_mexicana_MHOM/GT/2001/U1103 | product=hypothetical protein, conserved | location=LmxM.06:324520-325719(+) | length=1200 | sequence_SO=chromosome | mapping	1200	1184	302	882	96.8108	LmxM.06.0820 | organism=Leishmania_mexicana_MHOM/GT/2001/U1103 | product=hypothetical protein, conserved | location=LmxM.06:324520-325719(+) | length=1200 | sequence_SO=chromosome |	1200
LmxM.06.0830 | organism=Leishmania_mexicana_MHOM/GT/2001/U1103 | product=lipin, putative | location=LmxM.06:328025-332236(+) | length=4212 | sequence_SO=chromosome | mapping	4212	3988	326	3662	93.1489	LmxM.06.0830 | organism=Leishmania_mexicana_MHOM/GT/2001/U1103 | product=lipin, putative | location=LmxM.06:328025-332236(+) | length=4212 | sequence_SO=chromosome |	4212
LmxM.06.0840 | organism=Leishmania_mexicana_MHOM/GT/2001/U1103 | product=hypothetical protein, conserved | location=LmxM.06:333686-334423(+) | length=738 | sequence_SO=chromosome | mapping	738	633	249	384	82.9756	LmxM.06.0840 | organism=Leishmania_mexicana_MHOM/GT/2001/U1103 | product=hypothetical protein, conserved | location=LmxM.06:333686-334423(+) | length=738 | sequence_SO=chromosome |	738
LmxM.06.0850 | organism=Leishmania_mexicana_MHOM/GT/2001/U1103 | product=hypothetical protein, conserved | location=LmxM.06:335617-346194(+) | length=10578 | sequence_SO=chromosome | mapping	10578	10196	390	9806	95.1682	LmxM.06.0850 | organism=Leishmania_mexicana_MHOM/GT/2001/U1103 | product=hypothetical protein, conserved | location=LmxM.06:335617-346194(+) | length=10578 | sequence_SO=chromosome |	10578
LmxM.06.0860 | organism=Leishmania_mexicana_MHOM/GT/2001/U1103 | product=dihydrofolate reductase-thymidylate synthase | location=LmxM.06:347314-348876(+) | length=1563 | sequence_SO=chromosome | mapping	1563	1469	295	1174	92.0921	LmxM.06.0860 | organism=Leishmania_mexicana_MHOM/GT/2001/U1103 | product=dihydrofolate reductase-thymidylate synthase | location=LmxM.06:347314-348876(+) | length=1563 | sequence_SO=chromosome |	1563
LmxM.06.0870 | organism=Leishmania_mexicana_MHOM/GT/2001/U1103 | product=hypothetical protein, conserved | location=LmxM.06:350308-351630(+) | length=1323 | sequence_SO=chromosome | mapping	1323	1102	322	780	81.6568	LmxM.06.0870 | organism=Leishmania_mexicana_MHOM/GT/2001/U1103 | product=hypothetical protein, conserved | location=LmxM.06:350308-351630(+) | length=1323 | sequence_SO=chromosome |	1323
LmxM.06.0880 | organism=Leishmania_mexicana_MHOM/GT/2001/U1103 | product=acyl-coenzyme a dehydrogenase, putative | location=LmxM.06:353158-354408(+) | length=1251 | sequence_SO=chromosome | mapping	1251	1167	307	860	90.9736	LmxM.06.0880 | organism=Leishmania_mexicana_MHOM/GT/2001/U1103 | product=acyl-coenzyme a dehydrogenase, putative | location=LmxM.06:353158-354408(+) | length=1251 | sequence_SO=chromosome |	1251
LmxM.06.0890 | organism=Leishmania_mexicana_MHOM/GT/2001/U1103 | product=hypothetical protein, conserved | location=LmxM.06:356535-358799(+) | length=2265 | sequence_SO=chromosome | mapping	2265	2227	271	1956	96.3417	LmxM.06.0890 | organism=Leishmania_mexicana_MHOM/GT/2001/U1103 | product=hypothetical protein, conserved | location=LmxM.06:356535-358799(+) | length=2265 | sequence_SO=chromosome |	2265
LmxM.06.0900 | organism=Leishmania_mexicana_MHOM/GT/2001/U1103 | product=hypothetical protein, conserved | location=LmxM.06:360405-365192(+) | length=4788 | sequence_SO=chromosome | mapping	4788	4653	337	4316	95.8647	LmxM.06.0900 | organism=Leishmania_mexicana_MHOM/GT/2001/U1103 | product=hypothetical protein, conserved | location=LmxM.06:360405-365192(+) | length=4788 | sequence_SO=chromosome |	4788
LmxM.06.0910 | organism=Leishmania_mexicana_MHOM/GT/2001/U1103 | product=hypothetical protein, conserved | location=LmxM.06:366085-366750(+) | length=666 | sequence_SO=chromosome | mapping	666	631	353	278	92.1171	LmxM.06.0910 | organism=Leishmania_mexicana_MHOM/GT/2001/U1103 | product=hypothetical protein, conserved | location=LmxM.06:366085-366750(+) | length=666 | sequence_SO=chromosome |	666
LmxM.06.0920 | organism=Leishmania_mexicana_MHOM/GT/2001/U1103 | product=hypothetical protein, conserved | location=LmxM.06:367374-368681(+) | length=1308 | sequence_SO=chromosome | mapping	1308	1209	303	906	90.2997	LmxM.06.0920 | organism=Leishmania_mexicana_MHOM/GT/2001/U1103 | product=hypothetical protein, conserved | location=LmxM.06:367374-368681(+) | length=1308 | sequence_SO=chromosome |	1308
LmxM.06.0930 | organism=Leishmania_mexicana_MHOM/GT/2001/U1103 | product=2,4-dienoyl-coa reductase-like protein | location=LmxM.06:369556-371748(+) | length=2193 | sequence_SO=chromosome | mapping	2193	2150	284	1866	96.5426	LmxM.06.0930 | organism=Leishmania_mexicana_MHOM/GT/2001/U1103 | product=2,4-dienoyl-coa reductase-like protein | location=LmxM.06:369556-371748(+) | length=2193 | sequence_SO=chromosome |	2193
LmxM.06.0940 | organism=Leishmania_mexicana_MHOM/GT/2001/U1103 | product=hypothetical protein, conserved | location=LmxM.06:373434-375239(+) | length=1806 | sequence_SO=chromosome | mapping	1806	1685	303	1382	91.0227	LmxM.06.0940 | organism=Leishmania_mexicana_MHOM/GT/2001/U1103 | product=hypothetical protein, conserved | location=LmxM.06:373434-375239(+) | length=1806 | sequence_SO=chromosome |	1806
LmxM.06.0950 | organism=Leishmania_mexicana_MHOM/GT/2001/U1103 | product=glucosamine-fructose-6-phosphate aminotransferase, putative | location=LmxM.06:376260-378272(+) | length=2013 | sequence_SO=chromosome | mapping	2013	1951	203	1748	95.5852	LmxM.06.0950 | organism=Leishmania_mexicana_MHOM/GT/2001/U1103 | product=glucosamine-fructose-6-phosphate aminotransferase, putative | location=LmxM.06:376260-378272(+) | length=2013 | sequence_SO=chromosome |	2013
LmxM.06.0960 | organism=Leishmania_mexicana_MHOM/GT/2001/U1103 | product=cell cycle associated protein MOB1, putative | location=LmxM.06:379535-380206(+) | length=672 | sequence_SO=chromosome | mapping	672	598	254	344	85.9152	LmxM.06.0960 | organism=Leishmania_mexicana_MHOM/GT/2001/U1103 | product=cell cycle associated protein MOB1, putative | location=LmxM.06:379535-380206(+) | length=672 | sequence_SO=chromosome |	672
LmxM.06.0970 | organism=Leishmania_mexicana_MHOM/GT/2001/U1103 | product=hypothetical protein, conserved | location=LmxM.06:381092-386080(+) | length=4989 | sequence_SO=chromosome | mapping	4989	4905	331	4574	96.8811	LmxM.06.0970 | organism=Leishmania_mexicana_MHOM/GT/2001/U1103 | product=hypothetical protein, conserved | location=LmxM.06:381092-386080(+) | length=4989 | sequence_SO=chromosome |	4989
LmxM.06.0980 | organism=Leishmania_mexicana_MHOM/GT/2001/U1103 | product=hypothetical protein, conserved | location=LmxM.06:387208-390318(+) | length=3111 | sequence_SO=chromosome | mapping	3111	3028	288	2740	96.0469	LmxM.06.0980 | organism=Leishmania_mexicana_MHOM/GT/2001/U1103 | product=hypothetical protein, conserved | location=LmxM.06:387208-390318(+) | length=3111 | sequence_SO=chromosome |	3111
LmxM.06.0990 | organism=Leishmania_mexicana_MHOM/GT/2001/U1103 | product=hypothetical protein, conserved | location=LmxM.06:392657-396304(+) | length=3648 | sequence_SO=chromosome | mapping	3648	3563	325	3238	96.1272	LmxM.06.0990 | organism=Leishmania_mexicana_MHOM/GT/2001/U1103 | product=hypothetical protein, conserved | location=LmxM.06:392657-396304(+) | length=3648 | sequence_SO=chromosome |	3648
LmxM.06.0995 | organism=Leishmania_mexicana_MHOM/GT/2001/U1103 | product=hypothetical protein, unknown function | location=LmxM.06:397239-397706(+) | length=468 | sequence_SO=chromosome | mapping	468	458	332	126	92.1026	LmxM.06.0995 | organism=Leishmania_mexicana_MHOM/GT/2001/U1103 | product=hypothetical protein, unknown function | location=LmxM.06:397239-397706(+) | length=468 | sequence_SO=chromosome |	468
LmxM.06.1000 | organism=Leishmania_mexicana_MHOM/GT/2001/U1103 | product=hypothetical protein, conserved | location=LmxM.06:398260-399744(+) | length=1485 | sequence_SO=chromosome | mapping	1485	1460	296	1164	96.8963	LmxM.06.1000 | organism=Leishmania_mexicana_MHOM/GT/2001/U1103 | product=hypothetical protein, conserved | location=LmxM.06:398260-399744(+) | length=1485 | sequence_SO=chromosome |	1485
LmxM.06.1010 | organism=Leishmania_mexicana_MHOM/GT/2001/U1103 | product=hypothetical protein, conserved | location=LmxM.06:400674-402953(+) | length=2280 | sequence_SO=chromosome | mapping	2280	2188	350	1838	94.018	LmxM.06.1010 | organism=Leishmania_mexicana_MHOM/GT/2001/U1103 | product=hypothetical protein, conserved | location=LmxM.06:400674-402953(+) | length=2280 | sequence_SO=chromosome |	2280
LmxM.06.1020 | organism=Leishmania_mexicana_MHOM/GT/2001/U1103 | product=hypothetical protein, conserved | location=LmxM.06:403595-404287(+) | length=693 | sequence_SO=chromosome | mapping	693	659	291	368	92.2165	LmxM.06.1020 | organism=Leishmania_mexicana_MHOM/GT/2001/U1103 | product=hypothetical protein, conserved | location=LmxM.06:403595-404287(+) | length=693 | sequence_SO=chromosome |	693
LmxM.06.1030 | organism=Leishmania_mexicana_MHOM/GT/2001/U1103 | product=kinesin, putative | location=LmxM.06:405567-408236(+) | length=2670 | sequence_SO=chromosome | mapping	2670	2720	334	2386	100.463	LmxM.06.1030 | organism=Leishmania_mexicana_MHOM/GT/2001/U1103 | product=kinesin, putative | location=LmxM.06:405567-408236(+) | length=2670 | sequence_SO=chromosome |	2670
LmxM.06.1040 | organism=Leishmania_mexicana_MHOM/GT/2001/U1103 | product=hypothetical protein, conserved | location=LmxM.06:408707-410875(+) | length=2169 | sequence_SO=chromosome | mapping	2169	2126	322	1804	96.0549	LmxM.06.1040 | organism=Leishmania_mexicana_MHOM/GT/2001/U1103 | product=hypothetical protein, conserved | location=LmxM.06:408707-410875(+) | length=2169 | sequence_SO=chromosome |	2169
LmxM.06.1050 | organism=Leishmania_mexicana_MHOM/GT/2001/U1103 | product=protein disulfide isomerase | location=LmxM.06:411835-412236(+) | length=402 | sequence_SO=chromosome | mapping	402	372	302	70	87.0672	LmxM.06.1050 | organism=Leishmania_mexicana_MHOM/GT/2001/U1103 | product=protein disulfide isomerase | location=LmxM.06:411835-412236(+) | length=402 | sequence_SO=chromosome |	402
LmxM.06.1060 | organism=Leishmania_mexicana_MHOM/GT/2001/U1103 | product=hypothetical protein, conserved | location=LmxM.06:414315-415319(+) | length=1005 | sequence_SO=chromosome | mapping	1005	922	284	638	89.6378	LmxM.06.1060 | organism=Leishmania_mexicana_MHOM/GT/2001/U1103 | product=hypothetical protein, conserved | location=LmxM.06:414315-415319(+) | length=1005 | sequence_SO=chromosome |	1005
LmxM.06.1070 | organism=Leishmania_mexicana_MHOM/GT/2001/U1103 | product=deoxyribose-phosphate aldolase, putative | location=LmxM.06:416605-417450(+) | length=846 | sequence_SO=chromosome | mapping	846	814	330	484	94.2151	LmxM.06.1070 | organism=Leishmania_mexicana_MHOM/GT/2001/U1103 | product=deoxyribose-phosphate aldolase, putative | location=LmxM.06:416605-417450(+) | length=846 | sequence_SO=chromosome |	846
LmxM.06.1080 | organism=Leishmania_mexicana_MHOM/GT/2001/U1103 | product=hypothetical protein, unknown function | location=LmxM.06:419224-419898(+) | length=675 | sequence_SO=chromosome | mapping	675	698	330	368	100.653	LmxM.06.1080 | organism=Leishmania_mexicana_MHOM/GT/2001/U1103 | product=hypothetical protein, unknown function | location=LmxM.06:419224-419898(+) | length=675 | sequence_SO=chromosome |	675
LmxM.06.1090 | organism=Leishmania_mexicana_MHOM/GT/2001/U1103 | product=hypothetical protein, conserved | location=LmxM.06:420681-422468(+) | length=1788 | sequence_SO=chromosome | mapping	1788	1938	314	1624	106.623	LmxM.06.1090 | organism=Leishmania_mexicana_MHOM/GT/2001/U1103 | product=hypothetical protein, conserved | location=LmxM.06:420681-422468(+) | length=1788 | sequence_SO=chromosome |	1788
LmxM.06.1100 | organism=Leishmania_mexicana_MHOM/GT/2001/U1103 | product=hypothetical protein, conserved | location=LmxM.06:423613-424521(+) | length=909 | sequence_SO=chromosome | mapping	909	872	366	506	93.7789	LmxM.06.1100 | organism=Leishmania_mexicana_MHOM/GT/2001/U1103 | product=hypothetical protein, conserved | location=LmxM.06:423613-424521(+) | length=909 | sequence_SO=chromosome |	909
LmxM.06.1110 | organism=Leishmania_mexicana_MHOM/GT/2001/U1103 | product=hypothetical protein, conserved | location=LmxM.06:426657-429935(+) | length=3279 | sequence_SO=chromosome | mapping	3279	3424	302	3122	103.202	LmxM.06.1110 | organism=Leishmania_mexicana_MHOM/GT/2001/U1103 | product=hypothetical protein, conserved | location=LmxM.06:426657-429935(+) | length=3279 | sequence_SO=chromosome |	3279
LmxM.06.1120 | organism=Leishmania_mexicana_MHOM/GT/2001/U1103 | product=hypothetical protein, conserved | location=LmxM.06:432407-433228(+) | length=822 | sequence_SO=chromosome | mapping	822	734	286	448	86.444	LmxM.06.1120 | organism=Leishmania_mexicana_MHOM/GT/2001/U1103 | product=hypothetical protein, conserved | location=LmxM.06:432407-433228(+) | length=822 | sequence_SO=chromosome |	822
LmxM.06.1130 | organism=Leishmania_mexicana_MHOM/GT/2001/U1103 | product=hypothetical protein, conserved | location=LmxM.06:433990-434976(+) | length=987 | sequence_SO=chromosome | mapping	987	892	328	564	88.1297	LmxM.06.1130 | organism=Leishmania_mexicana_MHOM/GT/2001/U1103 | product=hypothetical protein, conserved | location=LmxM.06:433990-434976(+) | length=987 | sequence_SO=chromosome |	987
LmxM.06.1140 | organism=Leishmania_mexicana_MHOM/GT/2001/U1103 | product=hypothetical protein, conserved | location=LmxM.06:435131-437653(+) | length=2523 | sequence_SO=chromosome | mapping	2523	2703	359	2344	105.455	LmxM.06.1140 | organism=Leishmania_mexicana_MHOM/GT/2001/U1103 | product=hypothetical protein, conserved | location=LmxM.06:435131-437653(+) | length=2523 | sequence_SO=chromosome |	2523
LmxM.06.1150 | organism=Leishmania_mexicana_MHOM/GT/2001/U1103 | product=hypothetical protein, conserved | location=LmxM.06:438090-439655(+) | length=1566 | sequence_SO=chromosome | mapping	1566	1560	356	1204	97.6731	LmxM.06.1150 | organism=Leishmania_mexicana_MHOM/GT/2001/U1103 | product=hypothetical protein, conserved | location=LmxM.06:438090-439655(+) | length=1566 | sequence_SO=chromosome |	1566
LmxM.06.1160 | organism=Leishmania_mexicana_MHOM/GT/2001/U1103 | product=hypothetical protein, conserved | location=LmxM.06:440215-443511(+) | length=3297 | sequence_SO=chromosome | mapping	3297	3472	324	3148	103.83	LmxM.06.1160 | organism=Leishmania_mexicana_MHOM/GT/2001/U1103 | product=hypothetical protein, conserved | location=LmxM.06:440215-443511(+) | length=3297 | sequence_SO=chromosome |	3297
LmxM.06.1170 | organism=Leishmania_mexicana_MHOM/GT/2001/U1103 | product=nuclear transport factor 2 protein(NFT2), putative | location=LmxM.06:444192-444599(+) | length=408 | sequence_SO=chromosome | mapping	408	386	280	106	89.7181	LmxM.06.1170 | organism=Leishmania_mexicana_MHOM/GT/2001/U1103 | product=nuclear transport factor 2 protein(NFT2), putative | location=LmxM.06:444192-444599(+) | length=408 | sequence_SO=chromosome |	408
LmxM.06.1180 | organism=Leishmania_mexicana_MHOM/GT/2001/U1103 | product=protein kinase, putative | location=LmxM.06:445784-447151(+) | length=1368 | sequence_SO=chromosome | mapping	1368	1378	326	1052	99.4635	LmxM.06.1180 | organism=Leishmania_mexicana_MHOM/GT/2001/U1103 | product=protein kinase, putative | location=LmxM.06:445784-447151(+) | length=1368 | sequence_SO=chromosome |	1368
LmxM.06.1190 | organism=Leishmania_mexicana_MHOM/GT/2001/U1103 | product=hypothetical protein, conserved | location=LmxM.06:448104-448547(+) | length=444 | sequence_SO=chromosome | mapping	444	436	336	100	94.5	LmxM.06.1190 | organism=Leishmania_mexicana_MHOM/GT/2001/U1103 | product=hypothetical protein, conserved | location=LmxM.06:448104-448547(+) | length=444 | sequence_SO=chromosome |	444
LmxM.06.1200 | organism=Leishmania_mexicana_MHOM/GT/2001/U1103 | product=hypothetical protein, unknown function | location=LmxM.06:451583-452767(+) | length=1185 | sequence_SO=chromosome | mapping	1185	1165	319	846	96.2211	LmxM.06.1200 | organism=Leishmania_mexicana_MHOM/GT/2001/U1103 | product=hypothetical protein, unknown function | location=LmxM.06:451583-452767(+) | length=1185 | sequence_SO=chromosome |	1185
LmxM.06.1210 | organism=Leishmania_mexicana_MHOM/GT/2001/U1103 | product=hypothetical protein, unknown function | location=LmxM.06:453371-455128(+) | length=1758 | sequence_SO=chromosome | mapping	1758	1731	287	1444	96.1581	LmxM.06.1210 | organism=Leishmania_mexicana_MHOM/GT/2001/U1103 | product=hypothetical protein, unknown function | location=LmxM.06:453371-455128(+) | length=1758 | sequence_SO=chromosome |	1758
LmxM.06.1220 | organism=Leishmania_mexicana_MHOM/GT/2001/U1103 | product=hypothetical protein, unknown function | location=LmxM.06:456802-459174(+) | length=2373 | sequence_SO=chromosome | mapping	2373	2137	323	1814	88.5723	LmxM.06.1220 | organism=Leishmania_mexicana_MHOM/GT/2001/U1103 | product=hypothetical protein, unknown function | location=LmxM.06:456802-459174(+) | length=2373 | sequence_SO=chromosome |	2373
LmxM.06.1230 | organism=Leishmania_mexicana_MHOM/GT/2001/U1103 | product=hypothetical protein, conserved | location=LmxM.06:460233-461114(+) | length=882 | sequence_SO=chromosome | mapping	882	832	320	512	92.0238	LmxM.06.1230 | organism=Leishmania_mexicana_MHOM/GT/2001/U1103 | product=hypothetical protein, conserved | location=LmxM.06:460233-461114(+) | length=882 | sequence_SO=chromosome |	882
LmxM.06.1240 | organism=Leishmania_mexicana_MHOM/GT/2001/U1103 | product=hypothetical protein, conserved | location=LmxM.06:461744-463231(+) | length=1488 | sequence_SO=chromosome | mapping	1488	1272	332	940	84.0719	LmxM.06.1240 | organism=Leishmania_mexicana_MHOM/GT/2001/U1103 | product=hypothetical protein, conserved | location=LmxM.06:461744-463231(+) | length=1488 | sequence_SO=chromosome |	1488
LmxM.06.1245 | organism=Leishmania_mexicana_MHOM/GT/2001/U1103 | product=hypothetical protein, conserved | location=LmxM.06:464285-464587(+) | length=303 | sequence_SO=chromosome | mapping	303	263	243	20	80.5743	LmxM.06.1245 | organism=Leishmania_mexicana_MHOM/GT/2001/U1103 | product=hypothetical protein, conserved | location=LmxM.06:464285-464587(+) | length=303 | sequence_SO=chromosome |	303
LmxM.06.1250 | organism=Leishmania_mexicana_MHOM/GT/2001/U1103 | product=hypothetical protein, conserved | location=LmxM.06:465276-465992(+) | length=717 | sequence_SO=chromosome | mapping	717	697	303	394	94.5927	LmxM.06.1250 | organism=Leishmania_mexicana_MHOM/GT/2001/U1103 | product=hypothetical protein, conserved | location=LmxM.06:465276-465992(+) | length=717 | sequence_SO=chromosome |	717
LmxM.06.1260 | organism=Leishmania_mexicana_MHOM/GT/2001/U1103 | product=pteridine transporter, putative | location=LmxM.06:468529-470484(-) | length=1956 | sequence_SO=chromosome | mapping	1956	1905	319	1586	95.8001	LmxM.06.1260 | organism=Leishmania_mexicana_MHOM/GT/2001/U1103 | product=pteridine transporter, putative | location=LmxM.06:468529-470484(-) | length=1956 | sequence_SO=chromosome |	1956
LmxM.06.1270 | organism=Leishmania_mexicana_MHOM/GT/2001/U1103 | product=coproporphyrinogen III oxidase, putative | location=LmxM.06:472209-473114(-) | length=906 | sequence_SO=chromosome | mapping	906	863	297	566	92.894	LmxM.06.1270 | organism=Leishmania_mexicana_MHOM/GT/2001/U1103 | product=coproporphyrinogen III oxidase, putative | location=LmxM.06:472209-473114(-) | length=906 | sequence_SO=chromosome |	906
LmxM.06.1280 | organism=Leishmania_mexicana_MHOM/GT/2001/U1103 | product=protoporphyrinogen oxidase-like protein | location=LmxM.06:474097-474792(-) | length=696 | sequence_SO=chromosome | mapping	696	743	367	376	102.986	LmxM.06.1280 | organism=Leishmania_mexicana_MHOM/GT/2001/U1103 | product=protoporphyrinogen oxidase-like protein | location=LmxM.06:474097-474792(-) | length=696 | sequence_SO=chromosome |	696
LmxM.06.1290 | organism=Leishmania_mexicana_MHOM/GT/2001/U1103 | product=hypothetical protein, unknown function | location=LmxM.06:475967-476338(-) | length=372 | sequence_SO=chromosome | mapping	372	334	282	52	84.871	LmxM.06.1290 | organism=Leishmania_mexicana_MHOM/GT/2001/U1103 | product=hypothetical protein, unknown function | location=LmxM.06:475967-476338(-) | length=372 | sequence_SO=chromosome |	372
LmxM.07.0010 | organism=Leishmania_mexicana_MHOM/GT/2001/U1103 | product=Ubiquitin-like modifier-activating enzyme ATG7, putative,Autophagy-related protein 7 (ATG7) | location=LmxM.07:3399-5576(-) | length=2178 | sequence_SO=chromosome | mapping	2178	2191	359	1832	98.7736	LmxM.07.0010 | organism=Leishmania_mexicana_MHOM/GT/2001/U1103 | product=Ubiquitin-like modifier-activating enzyme ATG7, putative,Autophagy-related protein 7 (ATG7) | location=LmxM.07:3399-5576(-) | length=2178 | sequence_SO=chromosome |	2178
LmxM.07.0020 | organism=Leishmania_mexicana_MHOM/GT/2001/U1103 | product=hypothetical protein, conserved | location=LmxM.07:10609-11589(+) | length=981 | sequence_SO=chromosome | mapping	981	1061	343	718	105.544	LmxM.07.0020 | organism=Leishmania_mexicana_MHOM/GT/2001/U1103 | product=hypothetical protein, conserved | location=LmxM.07:10609-11589(+) | length=981 | sequence_SO=chromosome |	981
LmxM.07.0025 | organism=Leishmania_mexicana_MHOM/GT/2001/U1103 | product=histone-lysine N-methyltransferase, putative (DOT1A) | location=LmxM.07:12161-13060(+) | length=900 | sequence_SO=chromosome | mapping	900	926	360	566	100.4	LmxM.07.0025 | organism=Leishmania_mexicana_MHOM/GT/2001/U1103 | product=histone-lysine N-methyltransferase, putative (DOT1A) | location=LmxM.07:12161-13060(+) | length=900 | sequence_SO=chromosome |	900
LmxM.07.0030 | organism=Leishmania_mexicana_MHOM/GT/2001/U1103 | product=hypothetical protein, conserved | location=LmxM.07:14775-15230(+) | length=456 | sequence_SO=chromosome | mapping	456	437	329	108	91.4342	LmxM.07.0030 | organism=Leishmania_mexicana_MHOM/GT/2001/U1103 | product=hypothetical protein, conserved | location=LmxM.07:14775-15230(+) | length=456 | sequence_SO=chromosome |	456
LmxM.07.0040 | organism=Leishmania_mexicana_MHOM/GT/2001/U1103 | product=hypothetical protein, conserved | location=LmxM.07:15853-16803(+) | length=951 | sequence_SO=chromosome | mapping	951	925	341	584	95.0536	LmxM.07.0040 | organism=Leishmania_mexicana_MHOM/GT/2001/U1103 | product=hypothetical protein, conserved | location=LmxM.07:15853-16803(+) | length=951 | sequence_SO=chromosome |	951
LmxM.07.0050 | organism=Leishmania_mexicana_MHOM/GT/2001/U1103 | product=alpha-adaptin-like protein | location=LmxM.07:17400-20285(+) | length=2886 | sequence_SO=chromosome | mapping	2886	2747	263	2484	93.8098	LmxM.07.0050 | organism=Leishmania_mexicana_MHOM/GT/2001/U1103 | product=alpha-adaptin-like protein | location=LmxM.07:17400-20285(+) | length=2886 | sequence_SO=chromosome |	2886
LmxM.07.0060 | organism=Leishmania_mexicana_MHOM/GT/2001/U1103 | product=cytochrome c1, heme protein, mitochondrial precursor, putative | location=LmxM.07:21966-22742(+) | length=777 | sequence_SO=chromosome | mapping	777	710	312	398	88.9099	LmxM.07.0060 | organism=Leishmania_mexicana_MHOM/GT/2001/U1103 | product=cytochrome c1, heme protein, mitochondrial precursor, putative | location=LmxM.07:21966-22742(+) | length=777 | sequence_SO=chromosome |	777
LmxM.07.0070 | organism=Leishmania_mexicana_MHOM/GT/2001/U1103 | product=hypothetical protein, conserved | location=LmxM.07:23826-24404(+) | length=579 | sequence_SO=chromosome | mapping	579	614	366	248	102.864	LmxM.07.0070 | organism=Leishmania_mexicana_MHOM/GT/2001/U1103 | product=hypothetical protein, conserved | location=LmxM.07:23826-24404(+) | length=579 | sequence_SO=chromosome |	579
LmxM.07.0080 | organism=Leishmania_mexicana_MHOM/GT/2001/U1103 | product=Golgi/lysosome glycoprotein, putative | location=LmxM.07:25307-27178(+) | length=1872 | sequence_SO=chromosome | mapping	1872	1831	353	1478	96.0422	LmxM.07.0080 | organism=Leishmania_mexicana_MHOM/GT/2001/U1103 | product=Golgi/lysosome glycoprotein, putative | location=LmxM.07:25307-27178(+) | length=1872 | sequence_SO=chromosome |	1872
LmxM.07.0090 | organism=Leishmania_mexicana_MHOM/GT/2001/U1103 | product=cobalamin-dependent methionine synthase, putative | location=LmxM.07:28739-32497(+) | length=3759 | sequence_SO=chromosome | mapping	3759	3698	370	3328	97.1522	LmxM.07.0090 | organism=Leishmania_mexicana_MHOM/GT/2001/U1103 | product=cobalamin-dependent methionine synthase, putative | location=LmxM.07:28739-32497(+) | length=3759 | sequence_SO=chromosome |	3759
LmxM.07.0100 | organism=Leishmania_mexicana_MHOM/GT/2001/U1103 | product=pitrilysin-like metalloprotease,metallo-peptidase, Clan ME, Family M16C | location=LmxM.07:35081-38179(+) | length=3099 | sequence_SO=chromosome | mapping	3099	3364	314	3050	106.935	LmxM.07.0100 | organism=Leishmania_mexicana_MHOM/GT/2001/U1103 | product=pitrilysin-like metalloprotease,metallo-peptidase, Clan ME, Family M16C | location=LmxM.07:35081-38179(+) | length=3099 | sequence_SO=chromosome |	3099
LmxM.07.0110 | organism=Leishmania_mexicana_MHOM/GT/2001/U1103 | product=hypothetical protein, conserved | location=LmxM.07:40680-42026(+) | length=1347 | sequence_SO=chromosome | mapping	1347	1358	334	1024	98.5731	LmxM.07.0110 | organism=Leishmania_mexicana_MHOM/GT/2001/U1103 | product=hypothetical protein, conserved | location=LmxM.07:40680-42026(+) | length=1347 | sequence_SO=chromosome |	1347
LmxM.07.0120 | organism=Leishmania_mexicana_MHOM/GT/2001/U1103 | product=hypothetical protein, conserved | location=LmxM.07:43504-50109(+) | length=6606 | sequence_SO=chromosome | mapping	6606	7001	361	6640	104.525	LmxM.07.0120 | organism=Leishmania_mexicana_MHOM/GT/2001/U1103 | product=hypothetical protein, conserved | location=LmxM.07:43504-50109(+) | length=6606 | sequence_SO=chromosome |	6606
LmxM.07.0130 | organism=Leishmania_mexicana_MHOM/GT/2001/U1103 | product=tRNA-methyl transferase, putative | location=LmxM.07:50828-52639(+) | length=1812 | sequence_SO=chromosome | mapping	1812	1861	319	1542	100.826	LmxM.07.0130 | organism=Leishmania_mexicana_MHOM/GT/2001/U1103 | product=tRNA-methyl transferase, putative | location=LmxM.07:50828-52639(+) | length=1812 | sequence_SO=chromosome |	1812
LmxM.07.0140 | organism=Leishmania_mexicana_MHOM/GT/2001/U1103 | product=hypothetical protein, conserved | location=LmxM.07:53185-54243(+) | length=1059 | sequence_SO=chromosome | mapping	1059	1139	325	814	105.04	LmxM.07.0140 | organism=Leishmania_mexicana_MHOM/GT/2001/U1103 | product=hypothetical protein, conserved | location=LmxM.07:53185-54243(+) | length=1059 | sequence_SO=chromosome |	1059
LmxM.07.0150 | organism=Leishmania_mexicana_MHOM/GT/2001/U1103 | product=hypothetical protein, conserved | location=LmxM.07:54896-56686(+) | length=1791 | sequence_SO=chromosome | mapping	1791	1857	297	1560	101.386	LmxM.07.0150 | organism=Leishmania_mexicana_MHOM/GT/2001/U1103 | product=hypothetical protein, conserved | location=LmxM.07:54896-56686(+) | length=1791 | sequence_SO=chromosome |	1791
LmxM.07.0160 | organism=Leishmania_mexicana_MHOM/GT/2001/U1103 | product=protein kinase, putative | location=LmxM.07:60323-62866(-) | length=2544 | sequence_SO=chromosome | mapping	2544	2583	387	2196	99.8428	LmxM.07.0160 | organism=Leishmania_mexicana_MHOM/GT/2001/U1103 | product=protein kinase, putative | location=LmxM.07:60323-62866(-) | length=2544 | sequence_SO=chromosome |	2544
LmxM.07.0170 | organism=Leishmania_mexicana_MHOM/GT/2001/U1103 | product=protein kinase, putative | location=LmxM.07:66120-69305(-) | length=3186 | sequence_SO=chromosome | mapping	3189	3299	333	2966	101.893	LmxM.07.0170 | organism=Leishmania_mexicana_MHOM/GT/2001/U1103 | product=protein kinase, putative | location=LmxM.07:66120-69305(-) | length=3186 | sequence_SO=chromosome |	3186
LmxM.07.0180 | organism=Leishmania_mexicana_MHOM/GT/2001/U1103 | product=hypothetical protein, unknown function | location=LmxM.07:70068-76379(-) | length=6312 | sequence_SO=chromosome | mapping	6312	6156	306	5850	96.2132	LmxM.07.0180 | organism=Leishmania_mexicana_MHOM/GT/2001/U1103 | product=hypothetical protein, unknown function | location=LmxM.07:70068-76379(-) | length=6312 | sequence_SO=chromosome |	6312
LmxM.07.0190 | organism=Leishmania_mexicana_MHOM/GT/2001/U1103 | product=protein phosphatase 2A, regulatory subunit B, putative,phosphotyrosyl phosphate activator protein, putative | location=LmxM.07:78128-79309(-) | length=1182 | sequence_SO=chromosome | mapping	1182	1190	350	840	97.769	LmxM.07.0190 | organism=Leishmania_mexicana_MHOM/GT/2001/U1103 | product=protein phosphatase 2A, regulatory subunit B, putative,phosphotyrosyl phosphate activator protein, putative | location=LmxM.07:78128-79309(-) | length=1182 | sequence_SO=chromosome |	1182
LmxM.07.0200 | organism=Leishmania_mexicana_MHOM/GT/2001/U1103 | product=phosphatidylglycerolphosphate synthase, mitochondrial, putative (pgps) | location=LmxM.07:80445-82703(-) | length=2259 | sequence_SO=chromosome | mapping	2259	2318	282	2036	101.01	LmxM.07.0200 | organism=Leishmania_mexicana_MHOM/GT/2001/U1103 | product=phosphatidylglycerolphosphate synthase, mitochondrial, putative (pgps) | location=LmxM.07:80445-82703(-) | length=2259 | sequence_SO=chromosome |	2259
LmxM.07.0210 | organism=Leishmania_mexicana_MHOM/GT/2001/U1103 | product=hypothetical protein, conserved | location=LmxM.07:83329-84087(-) | length=759 | sequence_SO=chromosome | mapping	759	716	306	410	91.3465	LmxM.07.0210 | organism=Leishmania_mexicana_MHOM/GT/2001/U1103 | product=hypothetical protein, conserved | location=LmxM.07:83329-84087(-) | length=759 | sequence_SO=chromosome |	759
LmxM.07.0220 | organism=Leishmania_mexicana_MHOM/GT/2001/U1103 | product=hypothetical protein, conserved | location=LmxM.07:84874-86781(-) | length=1908 | sequence_SO=chromosome | mapping	1908	1861	347	1514	95.6478	LmxM.07.0220 | organism=Leishmania_mexicana_MHOM/GT/2001/U1103 | product=hypothetical protein, conserved | location=LmxM.07:84874-86781(-) | length=1908 | sequence_SO=chromosome |	1908
LmxM.07.0230 | organism=Leishmania_mexicana_MHOM/GT/2001/U1103 | product=hypothetical protein, conserved | location=LmxM.07:87404-87763(-) | length=360 | sequence_SO=chromosome | mapping	360	259	213	46	68.8389	LmxM.07.0230 | organism=Leishmania_mexicana_MHOM/GT/2001/U1103 | product=hypothetical protein, conserved | location=LmxM.07:87404-87763(-) | length=360 | sequence_SO=chromosome |	360
LmxM.07.0240 | organism=Leishmania_mexicana_MHOM/GT/2001/U1103 | product=hypothetical protein, conserved | location=LmxM.07:88425-90245(-) | length=1821 | sequence_SO=chromosome | mapping	1821	1851	325	1526	99.0291	LmxM.07.0240 | organism=Leishmania_mexicana_MHOM/GT/2001/U1103 | product=hypothetical protein, conserved | location=LmxM.07:88425-90245(-) | length=1821 | sequence_SO=chromosome |	1821
LmxM.07.0250 | organism=Leishmania_mexicana_MHOM/GT/2001/U1103 | product=protein kinase, putative | location=LmxM.07:91563-97277(-) | length=5715 | sequence_SO=chromosome | mapping	5715	5745	367	5378	99.0208	LmxM.07.0250 | organism=Leishmania_mexicana_MHOM/GT/2001/U1103 | product=protein kinase, putative | location=LmxM.07:91563-97277(-) | length=5715 | sequence_SO=chromosome |	5715
LmxM.07.0260 | organism=Leishmania_mexicana_MHOM/GT/2001/U1103 | product=homoserine dehydrogenase-like protein | location=LmxM.07:100010-101113(-) | length=1104 | sequence_SO=chromosome | mapping	1104	1068	326	742	94.7201	LmxM.07.0260 | organism=Leishmania_mexicana_MHOM/GT/2001/U1103 | product=homoserine dehydrogenase-like protein | location=LmxM.07:100010-101113(-) | length=1104 | sequence_SO=chromosome |	1104
LmxM.07.0270 | organism=Leishmania_mexicana_MHOM/GT/2001/U1103 | product=acetylornithine deacetylase-like protein | location=LmxM.07:103188-104381(-) | length=1194 | sequence_SO=chromosome | mapping	1194	1055	275	780	86.129	LmxM.07.0270 | organism=Leishmania_mexicana_MHOM/GT/2001/U1103 | product=acetylornithine deacetylase-like protein | location=LmxM.07:103188-104381(-) | length=1194 | sequence_SO=chromosome |	1194
LmxM.07.0280 | organism=Leishmania_mexicana_MHOM/GT/2001/U1103 | product=ubiquitin-protein ligase-like, putative | location=LmxM.07:104997-123644(-) | length=18648 | sequence_SO=chromosome | mapping	18648	18027	395	17632	95.5035	LmxM.07.0280 | organism=Leishmania_mexicana_MHOM/GT/2001/U1103 | product=ubiquitin-protein ligase-like, putative | location=LmxM.07:104997-123644(-) | length=18648 | sequence_SO=chromosome |	18648
LmxM.07.0290 | organism=Leishmania_mexicana_MHOM/GT/2001/U1103 | product=hypothetical protein, conserved | location=LmxM.07:126798-127562(-) | length=765 | sequence_SO=chromosome | mapping	765	715	325	390	90.6732	LmxM.07.0290 | organism=Leishmania_mexicana_MHOM/GT/2001/U1103 | product=hypothetical protein, conserved | location=LmxM.07:126798-127562(-) | length=765 | sequence_SO=chromosome |	765
LmxM.07.0300 | organism=Leishmania_mexicana_MHOM/GT/2001/U1103 | product=hypothetical protein, conserved | location=LmxM.07:129113-131710(-) | length=2598 | sequence_SO=chromosome | mapping	2598	2570	290	2280	97.0431	LmxM.07.0300 | organism=Leishmania_mexicana_MHOM/GT/2001/U1103 | product=hypothetical protein, conserved | location=LmxM.07:129113-131710(-) | length=2598 | sequence_SO=chromosome |	2598
LmxM.07.0310 | organism=Leishmania_mexicana_MHOM/GT/2001/U1103 | product=hypothetical protein, conserved | location=LmxM.07:132982-135408(-) | length=2427 | sequence_SO=chromosome | mapping	2427	2411	371	2040	97.9407	LmxM.07.0310 | organism=Leishmania_mexicana_MHOM/GT/2001/U1103 | product=hypothetical protein, conserved | location=LmxM.07:132982-135408(-) | length=2427 | sequence_SO=chromosome |	2427
LmxM.07.0320 | organism=Leishmania_mexicana_MHOM/GT/2001/U1103 | product=hypothetical protein, conserved | location=LmxM.07:136787-139885(-) | length=3099 | sequence_SO=chromosome | mapping	3099	3172	362	2810	100.823	LmxM.07.0320 | organism=Leishmania_mexicana_MHOM/GT/2001/U1103 | product=hypothetical protein, conserved | location=LmxM.07:136787-139885(-) | length=3099 | sequence_SO=chromosome |	3099
LmxM.07.0330 | organism=Leishmania_mexicana_MHOM/GT/2001/U1103 | product=hypothetical protein, conserved | location=LmxM.07:141021-143501(-) | length=2481 | sequence_SO=chromosome | mapping	2481	2348	358	1990	92.7815	LmxM.07.0330 | organism=Leishmania_mexicana_MHOM/GT/2001/U1103 | product=hypothetical protein, conserved | location=LmxM.07:141021-143501(-) | length=2481 | sequence_SO=chromosome |	2481
LmxM.07.0335 | organism=Leishmania_mexicana_MHOM/GT/2001/U1103 | product=NUDIX family hydrolase, putative | location=LmxM.07:144534-146852(-) | length=2319 | sequence_SO=chromosome | mapping	2319	2226	324	1902	94.3411	LmxM.07.0335 | organism=Leishmania_mexicana_MHOM/GT/2001/U1103 | product=NUDIX family hydrolase, putative | location=LmxM.07:144534-146852(-) | length=2319 | sequence_SO=chromosome |	2319
LmxM.07.0340 | organism=Leishmania_mexicana_MHOM/GT/2001/U1103 | product=ATP-dependent DEAD/H RNA helicase, putative | location=LmxM.07:152493-153740(-) | length=1248 | sequence_SO=chromosome | mapping	1248	1234	288	946	95.8958	LmxM.07.0340 | organism=Leishmania_mexicana_MHOM/GT/2001/U1103 | product=ATP-dependent DEAD/H RNA helicase, putative | location=LmxM.07:152493-153740(-) | length=1248 | sequence_SO=chromosome |	1248
LmxM.07.0350 | organism=Leishmania_mexicana_MHOM/GT/2001/U1103 | product=hypothetical protein, conserved | location=LmxM.07:154979-156952(-) | length=1974 | sequence_SO=chromosome | mapping	1974	2074	320	1754	103.339	LmxM.07.0350 | organism=Leishmania_mexicana_MHOM/GT/2001/U1103 | product=hypothetical protein, conserved | location=LmxM.07:154979-156952(-) | length=1974 | sequence_SO=chromosome |	1974
LmxM.07.0360 | organism=Leishmania_mexicana_MHOM/GT/2001/U1103 | product=hypothetical protein, conserved | location=LmxM.07:158157-158480(-) | length=324 | sequence_SO=chromosome | mapping	324	324	302	22	94.5988	LmxM.07.0360 | organism=Leishmania_mexicana_MHOM/GT/2001/U1103 | product=hypothetical protein, conserved | location=LmxM.07:158157-158480(-) | length=324 | sequence_SO=chromosome |	324
LmxM.07.0370 | organism=Leishmania_mexicana_MHOM/GT/2001/U1103 | product=hypothetical protein, unknown function | location=LmxM.07:161640-164399(-) | length=2760 | sequence_SO=chromosome | mapping	2760	2806	334	2472	99.7123	LmxM.07.0370 | organism=Leishmania_mexicana_MHOM/GT/2001/U1103 | product=hypothetical protein, unknown function | location=LmxM.07:161640-164399(-) | length=2760 | sequence_SO=chromosome |	2760
LmxM.07.0380 | organism=Leishmania_mexicana_MHOM/GT/2001/U1103 | product=hypothetical protein, conserved | location=LmxM.07:166023-176681(-) | length=10659 | sequence_SO=chromosome | mapping	10659	10562	432	10130	97.8458	LmxM.07.0380 | organism=Leishmania_mexicana_MHOM/GT/2001/U1103 | product=hypothetical protein, conserved | location=LmxM.07:166023-176681(-) | length=10659 | sequence_SO=chromosome |	10659
LmxM.07.0390 | organism=Leishmania_mexicana_MHOM/GT/2001/U1103 | product=hypothetical protein, conserved | location=LmxM.07:177494-180181(-) | length=2688 | sequence_SO=chromosome | mapping	2688	2747	341	2406	100.486	LmxM.07.0390 | organism=Leishmania_mexicana_MHOM/GT/2001/U1103 | product=hypothetical protein, conserved | location=LmxM.07:177494-180181(-) | length=2688 | sequence_SO=chromosome |	2688
LmxM.07.0400 | organism=Leishmania_mexicana_MHOM/GT/2001/U1103 | product=hypothetical protein, conserved | location=LmxM.07:181206-183041(-) | length=1836 | sequence_SO=chromosome | mapping	1836	1919	315	1604	102.586	LmxM.07.0400 | organism=Leishmania_mexicana_MHOM/GT/2001/U1103 | product=hypothetical protein, conserved | location=LmxM.07:181206-183041(-) | length=1836 | sequence_SO=chromosome |	1836
LmxM.07.0410 | organism=Leishmania_mexicana_MHOM/GT/2001/U1103 | product=hypothetical protein, conserved | location=LmxM.07:187348-188886(-) | length=1539 | sequence_SO=chromosome | mapping	1539	1558	340	1218	99.4237	LmxM.07.0410 | organism=Leishmania_mexicana_MHOM/GT/2001/U1103 | product=hypothetical protein, conserved | location=LmxM.07:187348-188886(-) | length=1539 | sequence_SO=chromosome |	1539
LmxM.07.0420 | organism=Leishmania_mexicana_MHOM/GT/2001/U1103 | product=hypothetical protein, conserved | location=LmxM.07:191096-191425(-) | length=330 | sequence_SO=chromosome | mapping	330	327	301	26	94.5121	LmxM.07.0420 | organism=Leishmania_mexicana_MHOM/GT/2001/U1103 | product=hypothetical protein, conserved | location=LmxM.07:191096-191425(-) | length=330 | sequence_SO=chromosome |	330
LmxM.07.0430 | organism=Leishmania_mexicana_MHOM/GT/2001/U1103 | product=maoc family dehydratase-like protein | location=LmxM.07:192544-193017(-) | length=474 | sequence_SO=chromosome | mapping	474	500	354	146	100.922	LmxM.07.0430 | organism=Leishmania_mexicana_MHOM/GT/2001/U1103 | product=maoc family dehydratase-like protein | location=LmxM.07:192544-193017(-) | length=474 | sequence_SO=chromosome |	474
LmxM.07.0440 | organism=Leishmania_mexicana_MHOM/GT/2001/U1103 | product=maoc family dehydratase-like protein | location=LmxM.07:194134-194607(-) | length=474 | sequence_SO=chromosome | mapping	474	468	332	136	95.7342	LmxM.07.0440 | organism=Leishmania_mexicana_MHOM/GT/2001/U1103 | product=maoc family dehydratase-like protein | location=LmxM.07:194134-194607(-) | length=474 | sequence_SO=chromosome |	474
LmxM.07.0450 | organism=Leishmania_mexicana_MHOM/GT/2001/U1103 | product=hypothetical protein, conserved | location=LmxM.07:195149-195649(-) | length=501 | sequence_SO=chromosome | mapping	501	520	338	182	100.601	LmxM.07.0450 | organism=Leishmania_mexicana_MHOM/GT/2001/U1103 | product=hypothetical protein, conserved | location=LmxM.07:195149-195649(-) | length=501 | sequence_SO=chromosome |	501
LmxM.07.0460 | organism=Leishmania_mexicana_MHOM/GT/2001/U1103 | product=acyl-CoA dehydrogenase, mitochondrial precursor, putative | location=LmxM.07:196495-198054(-) | length=1560 | sequence_SO=chromosome | mapping	1560	1645	367	1278	103.535	LmxM.07.0460 | organism=Leishmania_mexicana_MHOM/GT/2001/U1103 | product=acyl-CoA dehydrogenase, mitochondrial precursor, putative | location=LmxM.07:196495-198054(-) | length=1560 | sequence_SO=chromosome |	1560
LmxM.07.0470 | organism=Leishmania_mexicana_MHOM/GT/2001/U1103 | product=pre-rrna-processing protein tsr1 homolog | location=LmxM.07:198573-200915(-) | length=2343 | sequence_SO=chromosome | mapping	2343	2644	390	2254	111.316	LmxM.07.0470 | organism=Leishmania_mexicana_MHOM/GT/2001/U1103 | product=pre-rrna-processing protein tsr1 homolog | location=LmxM.07:198573-200915(-) | length=2343 | sequence_SO=chromosome |	2343
LmxM.07.0475 | organism=Leishmania_mexicana_MHOM/GT/2001/U1103 | product=hypothetical protein, conserved | location=LmxM.07:206610-207089(+) | length=480 | sequence_SO=chromosome | mapping	480	602	404	198	120.273	LmxM.07.0475 | organism=Leishmania_mexicana_MHOM/GT/2001/U1103 | product=hypothetical protein, conserved | location=LmxM.07:206610-207089(+) | length=480 | sequence_SO=chromosome |	480
LmxM.07.0480 | organism=Leishmania_mexicana_MHOM/GT/2001/U1103 | product=hypothetical protein, conserved | location=LmxM.07:207284-221905(+) | length=14622 | sequence_SO=chromosome | mapping	14622	15142	410	14732	102.463	LmxM.07.0480 | organism=Leishmania_mexicana_MHOM/GT/2001/U1103 | product=hypothetical protein, conserved | location=LmxM.07:207284-221905(+) | length=14622 | sequence_SO=chromosome |	14622
LmxM.07.0490 | organism=Leishmania_mexicana_MHOM/GT/2001/U1103 | product=hypothetical protein, conserved | location=LmxM.07:223395-224585(+) | length=1191 | sequence_SO=chromosome | mapping	1191	1131	321	810	93.0202	LmxM.07.0490 | organism=Leishmania_mexicana_MHOM/GT/2001/U1103 | product=hypothetical protein, conserved | location=LmxM.07:223395-224585(+) | length=1191 | sequence_SO=chromosome |	1191
LmxM.07.0500 | organism=Leishmania_mexicana_MHOM/GT/2001/U1103 | product=60S ribosomal protein L7a, putative | location=LmxM.07:226781-227575(+) | length=795 | sequence_SO=chromosome | mapping	795	606	266	340	74.2025	LmxM.07.0500 | organism=Leishmania_mexicana_MHOM/GT/2001/U1103 | product=60S ribosomal protein L7a, putative | location=LmxM.07:226781-227575(+) | length=795 | sequence_SO=chromosome |	795
LmxM.07.0510 | organism=Leishmania_mexicana_MHOM/GT/2001/U1103 | product=60S ribosomal protein L7a, putative | location=LmxM.07:228763-229662(+) | length=900 | sequence_SO=chromosome | mapping	900	765	281	484	82	LmxM.07.0510 | organism=Leishmania_mexicana_MHOM/GT/2001/U1103 | product=60S ribosomal protein L7a, putative | location=LmxM.07:228763-229662(+) | length=900 | sequence_SO=chromosome |	900
LmxM.07.0520 | organism=Leishmania_mexicana_MHOM/GT/2001/U1103 | product=QA-SNARE protein putative,hypothetical protein, conserved | location=LmxM.07:230892-231602(+) | length=711 | sequence_SO=chromosome | mapping	711	598	300	298	80.9241	LmxM.07.0520 | organism=Leishmania_mexicana_MHOM/GT/2001/U1103 | product=QA-SNARE protein putative,hypothetical protein, conserved | location=LmxM.07:230892-231602(+) | length=711 | sequence_SO=chromosome |	711
LmxM.07.0530 | organism=Leishmania_mexicana_MHOM/GT/2001/U1103 | product=adp/ATP carrier-like protein | location=LmxM.07:234777-235871(+) | length=1095 | sequence_SO=chromosome | mapping	1095	1127	305	822	99.7361	LmxM.07.0530 | organism=Leishmania_mexicana_MHOM/GT/2001/U1103 | product=adp/ATP carrier-like protein | location=LmxM.07:234777-235871(+) | length=1095 | sequence_SO=chromosome |	1095
LmxM.07.0540 | organism=Leishmania_mexicana_MHOM/GT/2001/U1103 | product=hypothetical protein, conserved | location=LmxM.07:238878-241100(+) | length=2223 | sequence_SO=chromosome | mapping	2220	2021	321	1700	89.2474	LmxM.07.0540 | organism=Leishmania_mexicana_MHOM/GT/2001/U1103 | product=hypothetical protein, conserved | location=LmxM.07:238878-241100(+) | length=2223 | sequence_SO=chromosome |	2223
LmxM.07.0550 | organism=Leishmania_mexicana_MHOM/GT/2001/U1103 | product=cysteine peptidase B (CPB), putative | location=LmxM.07:247457-252097(+) | length=4641 | sequence_SO=chromosome | mapping	4641	4580	328	4252	97.5637	LmxM.07.0550 | organism=Leishmania_mexicana_MHOM/GT/2001/U1103 | product=cysteine peptidase B (CPB), putative | location=LmxM.07:247457-252097(+) | length=4641 | sequence_SO=chromosome |	4641
LmxM.07.0560 | organism=Leishmania_mexicana_MHOM/GT/2001/U1103 | product=ras-related protein rab-14, putative | location=LmxM.07:253444-254121(+) | length=678 | sequence_SO=chromosome | mapping	678	685	301	384	97.1431	LmxM.07.0560 | organism=Leishmania_mexicana_MHOM/GT/2001/U1103 | product=ras-related protein rab-14, putative | location=LmxM.07:253444-254121(+) | length=678 | sequence_SO=chromosome |	678
LmxM.07.0570 | organism=Leishmania_mexicana_MHOM/GT/2001/U1103 | product=hypothetical protein, conserved | location=LmxM.07:255899-257305(+) | length=1407 | sequence_SO=chromosome | mapping	1407	1409	325	1084	97.7484	LmxM.07.0570 | organism=Leishmania_mexicana_MHOM/GT/2001/U1103 | product=hypothetical protein, conserved | location=LmxM.07:255899-257305(+) | length=1407 | sequence_SO=chromosome |	1407
LmxM.07.0580 | organism=Leishmania_mexicana_MHOM/GT/2001/U1103 | product=hypothetical protein, conserved | location=LmxM.07:258851-262456(+) | length=3606 | sequence_SO=chromosome | mapping	3597	3640	330	3310	99.4606	LmxM.07.0580 | organism=Leishmania_mexicana_MHOM/GT/2001/U1103 | product=hypothetical protein, conserved | location=LmxM.07:258851-262456(+) | length=3606 | sequence_SO=chromosome |	3606
LmxM.07.0590 | organism=Leishmania_mexicana_MHOM/GT/2001/U1103 | product=hypothetical protein, conserved | location=LmxM.07:263649-268451(+) | length=4803 | sequence_SO=chromosome | mapping	4803	4753	337	4416	97.2036	LmxM.07.0590 | organism=Leishmania_mexicana_MHOM/GT/2001/U1103 | product=hypothetical protein, conserved | location=LmxM.07:263649-268451(+) | length=4803 | sequence_SO=chromosome |	4803
LmxM.07.0600 | organism=Leishmania_mexicana_MHOM/GT/2001/U1103 | product=electron transfer flavoprotein-ubiquinone oxidoreductase, putative | location=LmxM.07:269597-271324(+) | length=1728 | sequence_SO=chromosome | mapping	1728	1549	195	1354	87.8119	LmxM.07.0600 | organism=Leishmania_mexicana_MHOM/GT/2001/U1103 | product=electron transfer flavoprotein-ubiquinone oxidoreductase, putative | location=LmxM.07:269597-271324(+) | length=1728 | sequence_SO=chromosome |	1728
LmxM.07.0610 | organism=Leishmania_mexicana_MHOM/GT/2001/U1103 | product=hypothetical protein, conserved | location=LmxM.07:272803-273390(+) | length=588 | sequence_SO=chromosome | mapping	588	626	314	312	102.478	LmxM.07.0610 | organism=Leishmania_mexicana_MHOM/GT/2001/U1103 | product=hypothetical protein, conserved | location=LmxM.07:272803-273390(+) | length=588 | sequence_SO=chromosome |	588
LmxM.07.0615 | organism=Leishmania_mexicana_MHOM/GT/2001/U1103 | product=hypothetical protein, conserved | location=LmxM.07:274267-275034(+) | length=768 | sequence_SO=chromosome | mapping	768	800	304	496	101.579	LmxM.07.0615 | organism=Leishmania_mexicana_MHOM/GT/2001/U1103 | product=hypothetical protein, conserved | location=LmxM.07:274267-275034(+) | length=768 | sequence_SO=chromosome |	768
LmxM.07.0620 | organism=Leishmania_mexicana_MHOM/GT/2001/U1103 | product=hypothetical protein, conserved | location=LmxM.07:276043-277521(+) | length=1479 | sequence_SO=chromosome | mapping	1479	1346	312	1034	89.0649	LmxM.07.0620 | organism=Leishmania_mexicana_MHOM/GT/2001/U1103 | product=hypothetical protein, conserved | location=LmxM.07:276043-277521(+) | length=1479 | sequence_SO=chromosome |	1479
LmxM.07.0630 | organism=Leishmania_mexicana_MHOM/GT/2001/U1103 | product=vacuolar-type Ca2+-ATPase, putative | location=LmxM.07:279066-282380(+) | length=3315 | sequence_SO=chromosome | mapping	3315	3534	426	3108	104.914	LmxM.07.0630 | organism=Leishmania_mexicana_MHOM/GT/2001/U1103 | product=vacuolar-type Ca2+-ATPase, putative | location=LmxM.07:279066-282380(+) | length=3315 | sequence_SO=chromosome |	3315
LmxM.07.0640 | organism=Leishmania_mexicana_MHOM/GT/2001/U1103 | product=hypothetical protein, conserved | location=LmxM.07:284176-285183(+) | length=1008 | sequence_SO=chromosome | mapping	1008	1055	339	716	102.338	LmxM.07.0640 | organism=Leishmania_mexicana_MHOM/GT/2001/U1103 | product=hypothetical protein, conserved | location=LmxM.07:284176-285183(+) | length=1008 | sequence_SO=chromosome |	1008
LmxM.07.0650 | organism=Leishmania_mexicana_MHOM/GT/2001/U1103 | product=vacuolar-type Ca2+-ATPase, putative | location=LmxM.07:286595-289954(+) | length=3360 | sequence_SO=chromosome | mapping	3358	3175	407	2768	93.0411	LmxM.07.0650 | organism=Leishmania_mexicana_MHOM/GT/2001/U1103 | product=vacuolar-type Ca2+-ATPase, putative | location=LmxM.07:286595-289954(+) | length=3360 | sequence_SO=chromosome |	3360
LmxM.07.0660 | organism=Leishmania_mexicana_MHOM/GT/2001/U1103 | product=hypothetical protein, conserved | location=LmxM.07:293935-295497(+) | length=1563 | sequence_SO=chromosome | mapping	1563	1662	336	1326	104.32	LmxM.07.0660 | organism=Leishmania_mexicana_MHOM/GT/2001/U1103 | product=hypothetical protein, conserved | location=LmxM.07:293935-295497(+) | length=1563 | sequence_SO=chromosome |	1563
LmxM.07.0670 | organism=Leishmania_mexicana_MHOM/GT/2001/U1103 | product=hypothetical protein, conserved | location=LmxM.07:296845-297354(+) | length=510 | sequence_SO=chromosome | mapping	510	504	320	184	94.1961	LmxM.07.0670 | organism=Leishmania_mexicana_MHOM/GT/2001/U1103 | product=hypothetical protein, conserved | location=LmxM.07:296845-297354(+) | length=510 | sequence_SO=chromosome |	510
LmxM.07.0680 | organism=Leishmania_mexicana_MHOM/GT/2001/U1103 | product=40S ribosomal protein S9, putative | location=LmxM.07:298560-299129(+) | length=570 | sequence_SO=chromosome | mapping	570	542	338	204	91.407	LmxM.07.0680 | organism=Leishmania_mexicana_MHOM/GT/2001/U1103 | product=40S ribosomal protein S9, putative | location=LmxM.07:298560-299129(+) | length=570 | sequence_SO=chromosome |	570
LmxM.07.0690 | organism=Leishmania_mexicana_MHOM/GT/2001/U1103 | product=protein kinase, putative | location=LmxM.07:301541-306601(+) | length=5061 | sequence_SO=chromosome | mapping	5061	5030	378	4652	97.9613	LmxM.07.0690 | organism=Leishmania_mexicana_MHOM/GT/2001/U1103 | product=protein kinase, putative | location=LmxM.07:301541-306601(+) | length=5061 | sequence_SO=chromosome |	5061
LmxM.07.0700 | organism=Leishmania_mexicana_MHOM/GT/2001/U1103 | product=topoisomerase-related function protein-like protein | location=LmxM.07:307905-310643(+) | length=2739 | sequence_SO=chromosome | mapping	2739	2804	320	2484	100.812	LmxM.07.0700 | organism=Leishmania_mexicana_MHOM/GT/2001/U1103 | product=topoisomerase-related function protein-like protein | location=LmxM.07:307905-310643(+) | length=2739 | sequence_SO=chromosome |	2739
LmxM.07.0710 | organism=Leishmania_mexicana_MHOM/GT/2001/U1103 | product=centrin, putative,caltractin, putative | location=LmxM.07:311482-312045(+) | length=564 | sequence_SO=chromosome | mapping	564	528	308	220	90.2872	LmxM.07.0710 | organism=Leishmania_mexicana_MHOM/GT/2001/U1103 | product=centrin, putative,caltractin, putative | location=LmxM.07:311482-312045(+) | length=564 | sequence_SO=chromosome |	564
LmxM.07.0715 | organism=Leishmania_mexicana_MHOM/GT/2001/U1103 | product=hypothetical protein | location=LmxM.07:313533-315275(+) | length=1743 | sequence_SO=chromosome | mapping	1743	1760	352	1408	98.957	LmxM.07.0715 | organism=Leishmania_mexicana_MHOM/GT/2001/U1103 | product=hypothetical protein | location=LmxM.07:313533-315275(+) | length=1743 | sequence_SO=chromosome |	1743
LmxM.07.0720 | organism=Leishmania_mexicana_MHOM/GT/2001/U1103 | product=hypothetical protein, conserved | location=LmxM.07:317196-320975(+) | length=3780 | sequence_SO=chromosome | mapping	3780	3637	325	3312	94.9704	LmxM.07.0720 | organism=Leishmania_mexicana_MHOM/GT/2001/U1103 | product=hypothetical protein, conserved | location=LmxM.07:317196-320975(+) | length=3780 | sequence_SO=chromosome |	3780
LmxM.07.0730 | organism=Leishmania_mexicana_MHOM/GT/2001/U1103 | product=malonyl-coa decarboxylase-like protein | location=LmxM.07:321946-324330(+) | length=2385 | sequence_SO=chromosome | mapping	2385	2499	285	2214	103.054	LmxM.07.0730 | organism=Leishmania_mexicana_MHOM/GT/2001/U1103 | product=malonyl-coa decarboxylase-like protein | location=LmxM.07:321946-324330(+) | length=2385 | sequence_SO=chromosome |	2385
LmxM.07.0740 | organism=Leishmania_mexicana_MHOM/GT/2001/U1103 | product=hypothetical protein, conserved | location=LmxM.07:324959-336391(+) | length=11433 | sequence_SO=chromosome | mapping	11433	11521	351	11170	99.5027	LmxM.07.0740 | organism=Leishmania_mexicana_MHOM/GT/2001/U1103 | product=hypothetical protein, conserved | location=LmxM.07:324959-336391(+) | length=11433 | sequence_SO=chromosome |	11433
LmxM.07.0743 | organism=Leishmania_mexicana_MHOM/GT/2001/U1103 | product=hypothetical protein, conserved | location=LmxM.07:337716-338168(+) | length=453 | sequence_SO=chromosome | mapping	453	372	268	104	79.0375	LmxM.07.0743 | organism=Leishmania_mexicana_MHOM/GT/2001/U1103 | product=hypothetical protein, conserved | location=LmxM.07:337716-338168(+) | length=453 | sequence_SO=chromosome |	453
LmxM.07.0750 | organism=Leishmania_mexicana_MHOM/GT/2001/U1103 | product=hypothetical protein, conserved | location=LmxM.07:340471-341358(+) | length=888 | sequence_SO=chromosome | mapping	888	789	307	482	86.777	LmxM.07.0750 | organism=Leishmania_mexicana_MHOM/GT/2001/U1103 | product=hypothetical protein, conserved | location=LmxM.07:340471-341358(+) | length=888 | sequence_SO=chromosome |	888
LmxM.07.0760 | organism=Leishmania_mexicana_MHOM/GT/2001/U1103 | product=6-phosphofructo-2-kinase-like protein | location=LmxM.07:342516-346442(+) | length=3927 | sequence_SO=chromosome | mapping	3927	4077	327	3750	102.542	LmxM.07.0760 | organism=Leishmania_mexicana_MHOM/GT/2001/U1103 | product=6-phosphofructo-2-kinase-like protein | location=LmxM.07:342516-346442(+) | length=3927 | sequence_SO=chromosome |	3927
LmxM.07.0770 | organism=Leishmania_mexicana_MHOM/GT/2001/U1103 | product=DNAJ-domain transmembrane-like protein | location=LmxM.07:349915-351138(+) | length=1224 | sequence_SO=chromosome | mapping	1224	1192	330	862	94.7786	LmxM.07.0770 | organism=Leishmania_mexicana_MHOM/GT/2001/U1103 | product=DNAJ-domain transmembrane-like protein | location=LmxM.07:349915-351138(+) | length=1224 | sequence_SO=chromosome |	1224
LmxM.07.0780 | organism=Leishmania_mexicana_MHOM/GT/2001/U1103 | product=hypothetical protein, conserved | location=LmxM.07:354294-355193(+) | length=900 | sequence_SO=chromosome | mapping	900	934	354	580	100.801	LmxM.07.0780 | organism=Leishmania_mexicana_MHOM/GT/2001/U1103 | product=hypothetical protein, conserved | location=LmxM.07:354294-355193(+) | length=900 | sequence_SO=chromosome |	900
LmxM.07.0790 | organism=Leishmania_mexicana_MHOM/GT/2001/U1103 | product=hypothetical protein, conserved | location=LmxM.07:355996-356859(+) | length=864 | sequence_SO=chromosome | mapping	864	816	294	522	91.4213	LmxM.07.0790 | organism=Leishmania_mexicana_MHOM/GT/2001/U1103 | product=hypothetical protein, conserved | location=LmxM.07:355996-356859(+) | length=864 | sequence_SO=chromosome |	864
LmxM.07.0800 | organism=Leishmania_mexicana_MHOM/GT/2001/U1103 | product=flavoprotein subunit-like protein | location=LmxM.07:358307-360325(+) | length=2019 | sequence_SO=chromosome | mapping	2019	2054	340	1714	99.949	LmxM.07.0800 | organism=Leishmania_mexicana_MHOM/GT/2001/U1103 | product=flavoprotein subunit-like protein | location=LmxM.07:358307-360325(+) | length=2019 | sequence_SO=chromosome |	2019
LmxM.07.0802 | organism=Leishmania_mexicana_MHOM/GT/2001/U1103 | product=hypothetical protein, conserved | location=LmxM.07:362730-363791(+) | length=1062 | sequence_SO=chromosome | mapping	1062	1127	351	776	103.028	LmxM.07.0802 | organism=Leishmania_mexicana_MHOM/GT/2001/U1103 | product=hypothetical protein, conserved | location=LmxM.07:362730-363791(+) | length=1062 | sequence_SO=chromosome |	1062
LmxM.07.0805 | organism=Leishmania_mexicana_MHOM/GT/2001/U1103 | product=phosphoacetylglucosamine mutase-like protein,acetylglucosaminephosphomutase, putative,N-acetylglucosamine-phosphate mutase, putative | location=LmxM.07:364772-366565(+) | length=1794 | sequence_SO=chromosome | mapping	1794	2010	438	1572	110.225	LmxM.07.0805 | organism=Leishmania_mexicana_MHOM/GT/2001/U1103 | product=phosphoacetylglucosamine mutase-like protein,acetylglucosaminephosphomutase, putative,N-acetylglucosamine-phosphate mutase, putative | location=LmxM.07:364772-366565(+) | length=1794 | sequence_SO=chromosome |	1794
LmxM.07.0810 | organism=Leishmania_mexicana_MHOM/GT/2001/U1103 | product=cytochrome b5-like protein | location=LmxM.07:367759-368178(+) | length=420 | sequence_SO=chromosome | mapping	420	427	335	92	96.9405	LmxM.07.0810 | organism=Leishmania_mexicana_MHOM/GT/2001/U1103 | product=cytochrome b5-like protein | location=LmxM.07:367759-368178(+) | length=420 | sequence_SO=chromosome |	420
LmxM.07.0830 | organism=Leishmania_mexicana_MHOM/GT/2001/U1103 | product=hypothetical protein, conserved | location=LmxM.07:370812-378005(+) | length=7194 | sequence_SO=chromosome | mapping	7192	7658	534	7124	104.799	LmxM.07.0830 | organism=Leishmania_mexicana_MHOM/GT/2001/U1103 | product=hypothetical protein, conserved | location=LmxM.07:370812-378005(+) | length=7194 | sequence_SO=chromosome |	7194
LmxM.07.0831 | organism=Leishmania_mexicana_MHOM/GT/2001/U1103 | product=hypothetical protein, conserved | location=LmxM.07:384617-390580(+) | length=5964 | sequence_SO=chromosome | mapping	5964	7625	1271	6354	125.235	LmxM.07.0831 | organism=Leishmania_mexicana_MHOM/GT/2001/U1103 | product=hypothetical protein, conserved | location=LmxM.07:384617-390580(+) | length=5964 | sequence_SO=chromosome |	5964
LmxM.07.0840 | organism=Leishmania_mexicana_MHOM/GT/2001/U1103 | product=hypothetical protein, conserved | location=LmxM.07:395329-399060(+) | length=3732 | sequence_SO=chromosome | mapping	3659	3196	172	3024	84.145	LmxM.07.0840 | organism=Leishmania_mexicana_MHOM/GT/2001/U1103 | product=hypothetical protein, conserved | location=LmxM.07:395329-399060(+) | length=3732 | sequence_SO=chromosome |	3732
LmxM.07.0850 | organism=Leishmania_mexicana_MHOM/GT/2001/U1103 | product=ubiquitin-conjugating enzyme E2, putative,ubiquitin-protein ligase, putative,ubiquitin carrier protein, putative | location=LmxM.07:402744-403292(+) | length=549 | sequence_SO=chromosome | mapping	549	479	283	196	84.439	LmxM.07.0850 | organism=Leishmania_mexicana_MHOM/GT/2001/U1103 | product=ubiquitin-conjugating enzyme E2, putative,ubiquitin-protein ligase, putative,ubiquitin carrier protein, putative | location=LmxM.07:402744-403292(+) | length=549 | sequence_SO=chromosome |	549
LmxM.07.0860 | organism=Leishmania_mexicana_MHOM/GT/2001/U1103 | product=hypothetical protein, unknown function | location=LmxM.07:413315-417649(+) | length=4335 | sequence_SO=chromosome | mapping	4335	4413	379	4034	100.258	LmxM.07.0860 | organism=Leishmania_mexicana_MHOM/GT/2001/U1103 | product=hypothetical protein, unknown function | location=LmxM.07:413315-417649(+) | length=4335 | sequence_SO=chromosome |	4335
LmxM.07.0870 | organism=Leishmania_mexicana_MHOM/GT/2001/U1103 | product=splicing factor ptsr1-like protein | location=LmxM.07:419404-420522(+) | length=1119 | sequence_SO=chromosome | mapping	1119	1080	352	728	93.9678	LmxM.07.0870 | organism=Leishmania_mexicana_MHOM/GT/2001/U1103 | product=splicing factor ptsr1-like protein | location=LmxM.07:419404-420522(+) | length=1119 | sequence_SO=chromosome |	1119
LmxM.07.0880 | organism=Leishmania_mexicana_MHOM/GT/2001/U1103 | product=protein kinase, putative | location=LmxM.07:425833-429915(+) | length=4083 | sequence_SO=chromosome | mapping	4083	4180	326	3854	100.971	LmxM.07.0880 | organism=Leishmania_mexicana_MHOM/GT/2001/U1103 | product=protein kinase, putative | location=LmxM.07:425833-429915(+) | length=4083 | sequence_SO=chromosome |	4083
LmxM.07.0890 | organism=Leishmania_mexicana_MHOM/GT/2001/U1103 | product=hypothetical protein, unknown function | location=LmxM.07:435776-437656(+) | length=1881 | sequence_SO=chromosome | mapping	1881	1942	338	1604	101.416	LmxM.07.0890 | organism=Leishmania_mexicana_MHOM/GT/2001/U1103 | product=hypothetical protein, unknown function | location=LmxM.07:435776-437656(+) | length=1881 | sequence_SO=chromosome |	1881
LmxM.07.0900 | organism=Leishmania_mexicana_MHOM/GT/2001/U1103 | product=serine/threonine kinase, putative,protein kinase, putative | location=LmxM.07:441328-442218(+) | length=891 | sequence_SO=chromosome | mapping	891	879	309	570	96.2435	LmxM.07.0900 | organism=Leishmania_mexicana_MHOM/GT/2001/U1103 | product=serine/threonine kinase, putative,protein kinase, putative | location=LmxM.07:441328-442218(+) | length=891 | sequence_SO=chromosome |	891
LmxM.07.0910 | organism=Leishmania_mexicana_MHOM/GT/2001/U1103 | product=hypothetical protein, conserved | location=LmxM.07:445700-451204(+) | length=5505 | sequence_SO=chromosome | mapping	5505	5292	248	5044	94.7539	LmxM.07.0910 | organism=Leishmania_mexicana_MHOM/GT/2001/U1103 | product=hypothetical protein, conserved | location=LmxM.07:445700-451204(+) | length=5505 | sequence_SO=chromosome |	5505
LmxM.07.0920 | organism=Leishmania_mexicana_MHOM/GT/2001/U1103 | product=hypothetical protein, conserved | location=LmxM.07:454925-461776(+) | length=6852 | sequence_SO=chromosome | mapping	6852	6645	391	6254	95.691	LmxM.07.0920 | organism=Leishmania_mexicana_MHOM/GT/2001/U1103 | product=hypothetical protein, conserved | location=LmxM.07:454925-461776(+) | length=6852 | sequence_SO=chromosome |	6852
LmxM.07.0930 | organism=Leishmania_mexicana_MHOM/GT/2001/U1103 | product=hypothetical protein, conserved | location=LmxM.07:462382-463374(+) | length=993 | sequence_SO=chromosome | mapping	993	945	291	654	92.709	LmxM.07.0930 | organism=Leishmania_mexicana_MHOM/GT/2001/U1103 | product=hypothetical protein, conserved | location=LmxM.07:462382-463374(+) | length=993 | sequence_SO=chromosome |	993
LmxM.07.0940 | organism=Leishmania_mexicana_MHOM/GT/2001/U1103 | product=hypothetical protein, conserved | location=LmxM.07:465551-472855(+) | length=7305 | sequence_SO=chromosome | mapping	7305	7264	356	6908	98.094	LmxM.07.0940 | organism=Leishmania_mexicana_MHOM/GT/2001/U1103 | product=hypothetical protein, conserved | location=LmxM.07:465551-472855(+) | length=7305 | sequence_SO=chromosome |	7305
LmxM.07.0950 | organism=Leishmania_mexicana_MHOM/GT/2001/U1103 | product=hypothetical protein, conserved | location=LmxM.07:476902-482784(+) | length=5883 | sequence_SO=chromosome | mapping	5883	5791	359	5432	96.9669	LmxM.07.0950 | organism=Leishmania_mexicana_MHOM/GT/2001/U1103 | product=hypothetical protein, conserved | location=LmxM.07:476902-482784(+) | length=5883 | sequence_SO=chromosome |	5883
LmxM.07.0960 | organism=Leishmania_mexicana_MHOM/GT/2001/U1103 | product=hypothetical protein, conserved | location=LmxM.07:484422-487889(+) | length=3468 | sequence_SO=chromosome | mapping	3468	3268	372	2896	92.7566	LmxM.07.0960 | organism=Leishmania_mexicana_MHOM/GT/2001/U1103 | product=hypothetical protein, conserved | location=LmxM.07:484422-487889(+) | length=3468 | sequence_SO=chromosome |	3468
LmxM.07.0970 | organism=Leishmania_mexicana_MHOM/GT/2001/U1103 | product=hypothetical protein, conserved | location=LmxM.07:489444-492083(+) | length=2640 | sequence_SO=chromosome | mapping	2640	2755	347	2408	102.509	LmxM.07.0970 | organism=Leishmania_mexicana_MHOM/GT/2001/U1103 | product=hypothetical protein, conserved | location=LmxM.07:489444-492083(+) | length=2640 | sequence_SO=chromosome |	2640
LmxM.07.0980 | organism=Leishmania_mexicana_MHOM/GT/2001/U1103 | product=RNA binding protein, putative | location=LmxM.07:492997-493353(+) | length=357 | sequence_SO=chromosome | mapping	357	310	262	48	82.5014	LmxM.07.0980 | organism=Leishmania_mexicana_MHOM/GT/2001/U1103 | product=RNA binding protein, putative | location=LmxM.07:492997-493353(+) | length=357 | sequence_SO=chromosome |	357
LmxM.07.0990 | organism=Leishmania_mexicana_MHOM/GT/2001/U1103 | product=nucleolar RNA-binding protein, putative | location=LmxM.07:494713-495738(+) | length=1026 | sequence_SO=chromosome | mapping	1026	1017	315	702	95.9113	LmxM.07.0990 | organism=Leishmania_mexicana_MHOM/GT/2001/U1103 | product=nucleolar RNA-binding protein, putative | location=LmxM.07:494713-495738(+) | length=1026 | sequence_SO=chromosome |	1026
LmxM.07.1000 | organism=Leishmania_mexicana_MHOM/GT/2001/U1103 | product=RNA binding protein-like protein | location=LmxM.07:498256-499356(+) | length=1101 | sequence_SO=chromosome | mapping	1101	1136	280	856	100.57	LmxM.07.1000 | organism=Leishmania_mexicana_MHOM/GT/2001/U1103 | product=RNA binding protein-like protein | location=LmxM.07:498256-499356(+) | length=1101 | sequence_SO=chromosome |	1101
LmxM.07.1010 | organism=Leishmania_mexicana_MHOM/GT/2001/U1103 | product=hypothetical protein, conserved | location=LmxM.07:500930-501418(+) | length=489 | sequence_SO=chromosome | mapping	489	490	320	170	95.7955	LmxM.07.1010 | organism=Leishmania_mexicana_MHOM/GT/2001/U1103 | product=hypothetical protein, conserved | location=LmxM.07:500930-501418(+) | length=489 | sequence_SO=chromosome |	489
LmxM.07.1020 | organism=Leishmania_mexicana_MHOM/GT/2001/U1103 | product=PIF1 helicase-like protein, putative,DNA repair and recombination protein, mitochondrial precursor, putative | location=LmxM.07:502804-506460(+) | length=3657 | sequence_SO=chromosome | mapping	3657	3608	322	3286	97.0864	LmxM.07.1020 | organism=Leishmania_mexicana_MHOM/GT/2001/U1103 | product=PIF1 helicase-like protein, putative,DNA repair and recombination protein, mitochondrial precursor, putative | location=LmxM.07:502804-506460(+) | length=3657 | sequence_SO=chromosome |	3657
LmxM.07.1030 | organism=Leishmania_mexicana_MHOM/GT/2001/U1103 | product=peptidyl-prolyl cis-trans isomerase/rotamase, putative,PPIase, putative | location=LmxM.07:507456-507803(+) | length=348 | sequence_SO=chromosome | mapping	348	322	272	50	87.4943	LmxM.07.1030 | organism=Leishmania_mexicana_MHOM/GT/2001/U1103 | product=peptidyl-prolyl cis-trans isomerase/rotamase, putative,PPIase, putative | location=LmxM.07:507456-507803(+) | length=348 | sequence_SO=chromosome |	348
LmxM.07.1035 | organism=Leishmania_mexicana_MHOM/GT/2001/U1103 | product=unspecified product | location=LmxM.07:509382-509948(+) | length=567 | sequence_SO=chromosome | mapping	567	518	318	200	87.6702	LmxM.07.1035 | organism=Leishmania_mexicana_MHOM/GT/2001/U1103 | product=unspecified product | location=LmxM.07:509382-509948(+) | length=567 | sequence_SO=chromosome |	567
LmxM.07.1040 | organism=Leishmania_mexicana_MHOM/GT/2001/U1103 | product=hypothetical protein, conserved | location=LmxM.07:511138-512112(+) | length=975 | sequence_SO=chromosome | mapping	975	1060	386	674	105.338	LmxM.07.1040 | organism=Leishmania_mexicana_MHOM/GT/2001/U1103 | product=hypothetical protein, conserved | location=LmxM.07:511138-512112(+) | length=975 | sequence_SO=chromosome |	975
LmxM.07.1050 | organism=Leishmania_mexicana_MHOM/GT/2001/U1103 | product=cation-transporting ATPase, putative | location=LmxM.07:513171-516905(+) | length=3735 | sequence_SO=chromosome | mapping	3735	3932	388	3544	103.728	LmxM.07.1050 | organism=Leishmania_mexicana_MHOM/GT/2001/U1103 | product=cation-transporting ATPase, putative | location=LmxM.07:513171-516905(+) | length=3735 | sequence_SO=chromosome |	3735
LmxM.07.1055 | organism=Leishmania_mexicana_MHOM/GT/2001/U1103 | product=hypothetical protein, conserved | location=LmxM.07:518797-519135(+) | length=339 | sequence_SO=chromosome | mapping	339	329	287	42	91.4956	LmxM.07.1055 | organism=Leishmania_mexicana_MHOM/GT/2001/U1103 | product=hypothetical protein, conserved | location=LmxM.07:518797-519135(+) | length=339 | sequence_SO=chromosome |	339
LmxM.07.1060 | organism=Leishmania_mexicana_MHOM/GT/2001/U1103 | product=lipoate-protein ligase-like,lipoyl ligase, putative,lipoyltransferase, putative,lipoate biosynthesis protein, putative | location=LmxM.07:520065-521609(+) | length=1545 | sequence_SO=chromosome | mapping	1545	1547	315	1232	98.2019	LmxM.07.1060 | organism=Leishmania_mexicana_MHOM/GT/2001/U1103 | product=lipoate-protein ligase-like,lipoyl ligase, putative,lipoyltransferase, putative,lipoate biosynthesis protein, putative | location=LmxM.07:520065-521609(+) | length=1545 | sequence_SO=chromosome |	1545
LmxM.07.1070 | organism=Leishmania_mexicana_MHOM/GT/2001/U1103 | product=RNA-editing complex protein, putative | location=LmxM.07:521964-523472(+) | length=1509 | sequence_SO=chromosome | mapping	1509	1661	353	1308	107.553	LmxM.07.1070 | organism=Leishmania_mexicana_MHOM/GT/2001/U1103 | product=RNA-editing complex protein, putative | location=LmxM.07:521964-523472(+) | length=1509 | sequence_SO=chromosome |	1509
LmxM.07.1080 | organism=Leishmania_mexicana_MHOM/GT/2001/U1103 | product=hypothetical protein, conserved | location=LmxM.07:525005-527521(+) | length=2517 | sequence_SO=chromosome | mapping	2517	2626	366	2260	102.815	LmxM.07.1080 | organism=Leishmania_mexicana_MHOM/GT/2001/U1103 | product=hypothetical protein, conserved | location=LmxM.07:525005-527521(+) | length=2517 | sequence_SO=chromosome |	2517
LmxM.07.1090 | organism=Leishmania_mexicana_MHOM/GT/2001/U1103 | product=fatty acid desaturase, putative | location=LmxM.07:529037-530290(+) | length=1254 | sequence_SO=chromosome | mapping	1254	1338	370	968	104.532	LmxM.07.1090 | organism=Leishmania_mexicana_MHOM/GT/2001/U1103 | product=fatty acid desaturase, putative | location=LmxM.07:529037-530290(+) | length=1254 | sequence_SO=chromosome |	1254
LmxM.07.1100 | organism=Leishmania_mexicana_MHOM/GT/2001/U1103 | product=hypothetical protein, conserved | location=LmxM.07:531794-532711(+) | length=918 | sequence_SO=chromosome | mapping	918	908	302	606	96.4357	LmxM.07.1100 | organism=Leishmania_mexicana_MHOM/GT/2001/U1103 | product=hypothetical protein, conserved | location=LmxM.07:531794-532711(+) | length=918 | sequence_SO=chromosome |	918
LmxM.07.1101 | organism=Leishmania_mexicana_MHOM/GT/2001/U1103 | product=unspecified product | location=LmxM.07:533320-534984(+) | length=1665 | sequence_SO=chromosome | mapping	1665	1810	378	1432	106.347	LmxM.07.1101 | organism=Leishmania_mexicana_MHOM/GT/2001/U1103 | product=unspecified product | location=LmxM.07:533320-534984(+) | length=1665 | sequence_SO=chromosome |	1665
LmxM.07.1110 | organism=Leishmania_mexicana_MHOM/GT/2001/U1103 | product=hypothetical protein, conserved | location=LmxM.07:535874-536962(+) | length=1089 | sequence_SO=chromosome | mapping	1089	1136	344	792	101.92	LmxM.07.1110 | organism=Leishmania_mexicana_MHOM/GT/2001/U1103 | product=hypothetical protein, conserved | location=LmxM.07:535874-536962(+) | length=1089 | sequence_SO=chromosome |	1089
LmxM.07.1120 | organism=Leishmania_mexicana_MHOM/GT/2001/U1103 | product=proteasome regulatory non-ATP-ase subunit, putative | location=LmxM.07:538622-539659(+) | length=1038 | sequence_SO=chromosome | mapping	1038	1099	321	778	103.711	LmxM.07.1120 | organism=Leishmania_mexicana_MHOM/GT/2001/U1103 | product=proteasome regulatory non-ATP-ase subunit, putative | location=LmxM.07:538622-539659(+) | length=1038 | sequence_SO=chromosome |	1038
LmxM.07.1130 | organism=Leishmania_mexicana_MHOM/GT/2001/U1103 | product=hypothetical protein, conserved | location=LmxM.07:541702-543432(+) | length=1731 | sequence_SO=chromosome | mapping	1731	1750	338	1412	99.1537	LmxM.07.1130 | organism=Leishmania_mexicana_MHOM/GT/2001/U1103 | product=hypothetical protein, conserved | location=LmxM.07:541702-543432(+) | length=1731 | sequence_SO=chromosome |	1731
LmxM.07.1140 | organism=Leishmania_mexicana_MHOM/GT/2001/U1103 | product=peptide methionine sulfoxide reductase-like,peptide Met(O) reductase, putative,methionine-S-sulfoxide reductase, putative | location=LmxM.07:544274-544804(+) | length=531 | sequence_SO=chromosome | mapping	531	512	348	164	93.2166	LmxM.07.1140 | organism=Leishmania_mexicana_MHOM/GT/2001/U1103 | product=peptide methionine sulfoxide reductase-like,peptide Met(O) reductase, putative,methionine-S-sulfoxide reductase, putative | location=LmxM.07:544274-544804(+) | length=531 | sequence_SO=chromosome |	531
LmxM.07.1150 | organism=Leishmania_mexicana_MHOM/GT/2001/U1103 | product=hypothetical protein, conserved | location=LmxM.07:547770-555377(+) | length=7608 | sequence_SO=chromosome | mapping	7608	7143	403	6740	92.6957	LmxM.07.1150 | organism=Leishmania_mexicana_MHOM/GT/2001/U1103 | product=hypothetical protein, conserved | location=LmxM.07:547770-555377(+) | length=7608 | sequence_SO=chromosome |	7608
LmxM.07.1160 | organism=Leishmania_mexicana_MHOM/GT/2001/U1103 | product=transmembrane amino acid transporter, putative | location=LmxM.07:556147-557622(+) | length=1476 | sequence_SO=chromosome | mapping	1476	1461	333	1128	97.0488	LmxM.07.1160 | organism=Leishmania_mexicana_MHOM/GT/2001/U1103 | product=transmembrane amino acid transporter, putative | location=LmxM.07:556147-557622(+) | length=1476 | sequence_SO=chromosome |	1476
LmxM.07.1170 | organism=Leishmania_mexicana_MHOM/GT/2001/U1103 | product=phosphoglycan beta 1,3 galactosyltransferase 1 | location=LmxM.07:563378-565603(+) | length=2226 | sequence_SO=chromosome | mapping	2226	5120	1404	3716	225.903	LmxM.07.1170 | organism=Leishmania_mexicana_MHOM/GT/2001/U1103 | product=phosphoglycan beta 1,3 galactosyltransferase 1 | location=LmxM.07:563378-565603(+) | length=2226 | sequence_SO=chromosome |	2226
LmxM.08.0010 | organism=Leishmania_mexicana_MHOM/GT/2001/U1103 | product=adaptor complex protein (AP) 3 delta subunit 1, putative | location=LmxM.08:1160058-1163654(+) | length=3597 | sequence_SO=chromosome | mapping	3597	3457	383	3074	94.5204	LmxM.08.0010 | organism=Leishmania_mexicana_MHOM/GT/2001/U1103 | product=adaptor complex protein (AP) 3 delta subunit 1, putative | location=LmxM.08:1160058-1163654(+) | length=3597 | sequence_SO=chromosome |	3597
LmxM.08.0020 | organism=Leishmania_mexicana_MHOM/GT/2001/U1103 | product=hypothetical protein, conserved | location=LmxM.08:1164673-1165494(+) | length=822 | sequence_SO=chromosome | mapping	822	778	302	476	92.365	LmxM.08.0020 | organism=Leishmania_mexicana_MHOM/GT/2001/U1103 | product=hypothetical protein, conserved | location=LmxM.08:1164673-1165494(+) | length=822 | sequence_SO=chromosome |	822
LmxM.08.0030 | organism=Leishmania_mexicana_MHOM/GT/2001/U1103 | product=Qc-SNARE protein, putative | location=LmxM.08:1166615-1167262(+) | length=648 | sequence_SO=chromosome | mapping	648	665	367	298	99.5077	LmxM.08.0030 | organism=Leishmania_mexicana_MHOM/GT/2001/U1103 | product=Qc-SNARE protein, putative | location=LmxM.08:1166615-1167262(+) | length=648 | sequence_SO=chromosome |	648
LmxM.08.0040 | organism=Leishmania_mexicana_MHOM/GT/2001/U1103 | product=hypothetical protein, conserved | location=LmxM.08:1169138-1169827(+) | length=690 | sequence_SO=chromosome | mapping	690	628	292	336	88.0493	LmxM.08.0040 | organism=Leishmania_mexicana_MHOM/GT/2001/U1103 | product=hypothetical protein, conserved | location=LmxM.08:1169138-1169827(+) | length=690 | sequence_SO=chromosome |	690
LmxM.08.0050 | organism=Leishmania_mexicana_MHOM/GT/2001/U1103 | product=hypothetical protein | location=LmxM.08:1170952-1171179(+) | length=228 | sequence_SO=chromosome | mapping	228	221	213	8	88.8772	LmxM.08.0050 | organism=Leishmania_mexicana_MHOM/GT/2001/U1103 | product=hypothetical protein | location=LmxM.08:1170952-1171179(+) | length=228 | sequence_SO=chromosome |	228
LmxM.08.0060 | organism=Leishmania_mexicana_MHOM/GT/2001/U1103 | product=phosphoglycerate mutase protein, putative | location=LmxM.08:1172788-1173345(+) | length=558 | sequence_SO=chromosome | mapping	558	492	296	196	84.2849	LmxM.08.0060 | organism=Leishmania_mexicana_MHOM/GT/2001/U1103 | product=phosphoglycerate mutase protein, putative | location=LmxM.08:1172788-1173345(+) | length=558 | sequence_SO=chromosome |	558
LmxM.08.0070 | organism=Leishmania_mexicana_MHOM/GT/2001/U1103 | product=unspecified product | location=LmxM.08:1173960-1175849(+) | length=1890 | sequence_SO=chromosome | mapping	1890	1687	313	1374	87.672	LmxM.08.0070 | organism=Leishmania_mexicana_MHOM/GT/2001/U1103 | product=unspecified product | location=LmxM.08:1173960-1175849(+) | length=1890 | sequence_SO=chromosome |	1890
LmxM.08.0080 | organism=Leishmania_mexicana_MHOM/GT/2001/U1103 | product=ATP-dependent DEAD/H RNA helicase, putative | location=LmxM.08:1177310-1179367(+) | length=2058 | sequence_SO=chromosome | mapping	2058	1883	255	1628	89.8858	LmxM.08.0080 | organism=Leishmania_mexicana_MHOM/GT/2001/U1103 | product=ATP-dependent DEAD/H RNA helicase, putative | location=LmxM.08:1177310-1179367(+) | length=2058 | sequence_SO=chromosome |	2058
LmxM.08.0090 | organism=Leishmania_mexicana_MHOM/GT/2001/U1103 | product=adaptor complex protein (AP) 3 delta subunit 1, putative | location=LmxM.08:1180739-1184140(+) | length=3402 | sequence_SO=chromosome | mapping	3402	3460	386	3074	100.156	LmxM.08.0090 | organism=Leishmania_mexicana_MHOM/GT/2001/U1103 | product=adaptor complex protein (AP) 3 delta subunit 1, putative | location=LmxM.08:1180739-1184140(+) | length=3402 | sequence_SO=chromosome |	3402
LmxM.08.0100 | organism=Leishmania_mexicana_MHOM/GT/2001/U1103 | product=dual-specificity protein phosphatase, putative | location=LmxM.08:1186116-1187471(+) | length=1356 | sequence_SO=chromosome | mapping	1356	1332	366	966	96.2286	LmxM.08.0100 | organism=Leishmania_mexicana_MHOM/GT/2001/U1103 | product=dual-specificity protein phosphatase, putative | location=LmxM.08:1186116-1187471(+) | length=1356 | sequence_SO=chromosome |	1356
LmxM.08.0110 | organism=Leishmania_mexicana_MHOM/GT/2001/U1103 | product=hypothetical protein, unknown function | location=LmxM.08:1188872-1190803(+) | length=1932 | sequence_SO=chromosome | mapping	1932	1913	333	1580	97.2604	LmxM.08.0110 | organism=Leishmania_mexicana_MHOM/GT/2001/U1103 | product=hypothetical protein, unknown function | location=LmxM.08:1188872-1190803(+) | length=1932 | sequence_SO=chromosome |	1932
LmxM.08.0120 | organism=Leishmania_mexicana_MHOM/GT/2001/U1103 | product=hypothetical protein, conserved | location=LmxM.08:1192678-1193490(+) | length=813 | sequence_SO=chromosome | mapping	813	732	280	452	87.1722	LmxM.08.0120 | organism=Leishmania_mexicana_MHOM/GT/2001/U1103 | product=hypothetical protein, conserved | location=LmxM.08:1192678-1193490(+) | length=813 | sequence_SO=chromosome |	813
LmxM.08.0130 | organism=Leishmania_mexicana_MHOM/GT/2001/U1103 | product=hypothetical protein, conserved | location=LmxM.08:1194934-1198392(+) | length=3459 | sequence_SO=chromosome | mapping	3459	3141	321	2820	89.5609	LmxM.08.0130 | organism=Leishmania_mexicana_MHOM/GT/2001/U1103 | product=hypothetical protein, conserved | location=LmxM.08:1194934-1198392(+) | length=3459 | sequence_SO=chromosome |	3459
LmxM.08.0135 | organism=Leishmania_mexicana_MHOM/GT/2001/U1103 | product=hypothetical protein, conserved (pseudogene) | location=LmxM.08:1200824-1202581(+) | length=1758 | sequence_SO=chromosome | mapping	1758	1920	342	1578	107.573	LmxM.08.0135 | organism=Leishmania_mexicana_MHOM/GT/2001/U1103 | product=hypothetical protein, conserved (pseudogene) | location=LmxM.08:1200824-1202581(+) | length=1758 | sequence_SO=chromosome |	1758
LmxM.08.0140 | organism=Leishmania_mexicana_MHOM/GT/2001/U1103 | product=DNA repair protein, putative | location=LmxM.08:1203525-1207307(+) | length=3783 | sequence_SO=chromosome | mapping	3783	3686	326	3360	96.2276	LmxM.08.0140 | organism=Leishmania_mexicana_MHOM/GT/2001/U1103 | product=DNA repair protein, putative | location=LmxM.08:1203525-1207307(+) | length=3783 | sequence_SO=chromosome |	3783
LmxM.08.0150 | organism=Leishmania_mexicana_MHOM/GT/2001/U1103 | product=hypothetical protein, conserved | location=LmxM.08:1208745-1210055(+) | length=1311 | sequence_SO=chromosome | mapping	1311	1248	298	950	93.1114	LmxM.08.0150 | organism=Leishmania_mexicana_MHOM/GT/2001/U1103 | product=hypothetical protein, conserved | location=LmxM.08:1208745-1210055(+) | length=1311 | sequence_SO=chromosome |	1311
LmxM.08.0160 | organism=Leishmania_mexicana_MHOM/GT/2001/U1103 | product=hypothetical protein, conserved | location=LmxM.08:1211311-1212009(+) | length=699 | sequence_SO=chromosome | mapping	699	640	294	346	89.5808	LmxM.08.0160 | organism=Leishmania_mexicana_MHOM/GT/2001/U1103 | product=hypothetical protein, conserved | location=LmxM.08:1211311-1212009(+) | length=699 | sequence_SO=chromosome |	699
LmxM.08.0170 | organism=Leishmania_mexicana_MHOM/GT/2001/U1103 | product=hypothetical protein, unknown function | location=LmxM.08:1218134-1220017(+) | length=1884 | sequence_SO=chromosome | mapping	1884	1835	345	1490	95.9076	LmxM.08.0170 | organism=Leishmania_mexicana_MHOM/GT/2001/U1103 | product=hypothetical protein, unknown function | location=LmxM.08:1218134-1220017(+) | length=1884 | sequence_SO=chromosome |	1884
LmxM.08.0180 | organism=Leishmania_mexicana_MHOM/GT/2001/U1103 | product=hypothetical protein, conserved | location=LmxM.08:1226149-1227033(+) | length=885 | sequence_SO=chromosome | mapping	885	855	307	548	93.8215	LmxM.08.0180 | organism=Leishmania_mexicana_MHOM/GT/2001/U1103 | product=hypothetical protein, conserved | location=LmxM.08:1226149-1227033(+) | length=885 | sequence_SO=chromosome |	885
LmxM.08.0190 | organism=Leishmania_mexicana_MHOM/GT/2001/U1103 | product=hypothetical protein, unknown function | location=LmxM.08:1228121-1231000(+) | length=2880 | sequence_SO=chromosome | mapping	2880	2865	319	2546	98.0799	LmxM.08.0190 | organism=Leishmania_mexicana_MHOM/GT/2001/U1103 | product=hypothetical protein, unknown function | location=LmxM.08:1228121-1231000(+) | length=2880 | sequence_SO=chromosome |	2880
LmxM.08.0200 | organism=Leishmania_mexicana_MHOM/GT/2001/U1103 | product=hypothetical protein, conserved | location=LmxM.08:1232526-1234463(+) | length=1938 | sequence_SO=chromosome | mapping	1938	1877	337	1540	95.3798	LmxM.08.0200 | organism=Leishmania_mexicana_MHOM/GT/2001/U1103 | product=hypothetical protein, conserved | location=LmxM.08:1232526-1234463(+) | length=1938 | sequence_SO=chromosome |	1938
LmxM.08.0210 | organism=Leishmania_mexicana_MHOM/GT/2001/U1103 | product=hypothetical protein, unknown function | location=LmxM.08:1236238-1237791(+) | length=1554 | sequence_SO=chromosome | mapping	1554	1527	291	1236	96.5264	LmxM.08.0210 | organism=Leishmania_mexicana_MHOM/GT/2001/U1103 | product=hypothetical protein, unknown function | location=LmxM.08:1236238-1237791(+) | length=1554 | sequence_SO=chromosome |	1554
LmxM.08.0220 | organism=Leishmania_mexicana_MHOM/GT/2001/U1103 | product=ubiquitin-activating enzyme-like protein | location=LmxM.08:1238386-1241547(+) | length=3162 | sequence_SO=chromosome | mapping	3162	3140	340	2800	98	LmxM.08.0220 | organism=Leishmania_mexicana_MHOM/GT/2001/U1103 | product=ubiquitin-activating enzyme-like protein | location=LmxM.08:1238386-1241547(+) | length=3162 | sequence_SO=chromosome |	3162
LmxM.08.0230 | organism=Leishmania_mexicana_MHOM/GT/2001/U1103 | product=hypothetical protein, conserved | location=LmxM.08:1243094-1244662(+) | length=1569 | sequence_SO=chromosome | mapping	1569	1510	312	1198	94.5755	LmxM.08.0230 | organism=Leishmania_mexicana_MHOM/GT/2001/U1103 | product=hypothetical protein, conserved | location=LmxM.08:1243094-1244662(+) | length=1569 | sequence_SO=chromosome |	1569
LmxM.08.0240 | organism=Leishmania_mexicana_MHOM/GT/2001/U1103 | product=hypothetical protein, conserved | location=LmxM.08:1245683-1246471(+) | length=789 | sequence_SO=chromosome | mapping	789	781	315	466	96.2902	LmxM.08.0240 | organism=Leishmania_mexicana_MHOM/GT/2001/U1103 | product=hypothetical protein, conserved | location=LmxM.08:1245683-1246471(+) | length=789 | sequence_SO=chromosome |	789
LmxM.08.0250 | organism=Leishmania_mexicana_MHOM/GT/2001/U1103 | product=hypothetical protein, conserved | location=LmxM.08:1247434-1247775(+) | length=342 | sequence_SO=chromosome | mapping	342	349	303	46	96.8187	LmxM.08.0250 | organism=Leishmania_mexicana_MHOM/GT/2001/U1103 | product=hypothetical protein, conserved | location=LmxM.08:1247434-1247775(+) | length=342 | sequence_SO=chromosome |	342
LmxM.08.0260 | organism=Leishmania_mexicana_MHOM/GT/2001/U1103 | product=hypothetical protein, conserved | location=LmxM.08:1249421-1250737(+) | length=1317 | sequence_SO=chromosome | mapping	1317	1243	325	918	92.5406	LmxM.08.0260 | organism=Leishmania_mexicana_MHOM/GT/2001/U1103 | product=hypothetical protein, conserved | location=LmxM.08:1249421-1250737(+) | length=1317 | sequence_SO=chromosome |	1317
LmxM.08.0270 | organism=Leishmania_mexicana_MHOM/GT/2001/U1103 | product=hypothetical protein | location=LmxM.08:1252145-1254646(+) | length=2502 | sequence_SO=chromosome | mapping	2502	2384	270	2114	93.7626	LmxM.08.0270 | organism=Leishmania_mexicana_MHOM/GT/2001/U1103 | product=hypothetical protein | location=LmxM.08:1252145-1254646(+) | length=2502 | sequence_SO=chromosome |	2502
LmxM.08.0280 | organism=Leishmania_mexicana_MHOM/GT/2001/U1103 | product=ribosomal protein L2, putative | location=LmxM.08:1257363-1258505(+) | length=1143 | sequence_SO=chromosome | mapping	1143	1090	322	768	92.6527	LmxM.08.0280 | organism=Leishmania_mexicana_MHOM/GT/2001/U1103 | product=ribosomal protein L2, putative | location=LmxM.08:1257363-1258505(+) | length=1143 | sequence_SO=chromosome |	1143
LmxM.08.0290 | organism=Leishmania_mexicana_MHOM/GT/2001/U1103 | product=iron superoxide dismutase | location=LmxM.08:1259257-1259949(+) | length=693 | sequence_SO=chromosome | mapping	693	609	235	374	85.1515	LmxM.08.0290 | organism=Leishmania_mexicana_MHOM/GT/2001/U1103 | product=iron superoxide dismutase | location=LmxM.08:1259257-1259949(+) | length=693 | sequence_SO=chromosome |	693
LmxM.08.0300 | organism=Leishmania_mexicana_MHOM/GT/2001/U1103 | product=hypothetical protein, conserved | location=LmxM.08:1261790-1262548(+) | length=759 | sequence_SO=chromosome | mapping	759	740	334	406	94.2306	LmxM.08.0300 | organism=Leishmania_mexicana_MHOM/GT/2001/U1103 | product=hypothetical protein, conserved | location=LmxM.08:1261790-1262548(+) | length=759 | sequence_SO=chromosome |	759
LmxM.08.0310 | organism=Leishmania_mexicana_MHOM/GT/2001/U1103 | product=hypothetical protein, unknown function | location=LmxM.08:1263600-1264427(+) | length=828 | sequence_SO=chromosome | mapping	828	776	276	500	91.4529	LmxM.08.0310 | organism=Leishmania_mexicana_MHOM/GT/2001/U1103 | product=hypothetical protein, unknown function | location=LmxM.08:1263600-1264427(+) | length=828 | sequence_SO=chromosome |	828
LmxM.08.0320 | organism=Leishmania_mexicana_MHOM/GT/2001/U1103 | product=mitochondrial associated ribonuclease, putative | location=LmxM.08:1265285-1265953(+) | length=669 | sequence_SO=chromosome | mapping	669	601	261	340	86.8969	LmxM.08.0320 | organism=Leishmania_mexicana_MHOM/GT/2001/U1103 | product=mitochondrial associated ribonuclease, putative | location=LmxM.08:1265285-1265953(+) | length=669 | sequence_SO=chromosome |	669
LmxM.08.0330 | organism=Leishmania_mexicana_MHOM/GT/2001/U1103 | product=hypothetical protein, conserved | location=LmxM.08:1267090-1267377(+) | length=288 | sequence_SO=chromosome | mapping	288	265	247	18	85.6597	LmxM.08.0330 | organism=Leishmania_mexicana_MHOM/GT/2001/U1103 | product=hypothetical protein, conserved | location=LmxM.08:1267090-1267377(+) | length=288 | sequence_SO=chromosome |	288
LmxM.08.0340 | organism=Leishmania_mexicana_MHOM/GT/2001/U1103 | product=hypothetical protein, conserved | location=LmxM.08:1268703-1283033(+) | length=14331 | sequence_SO=chromosome | mapping	14331	14302	428	13874	98.6925	LmxM.08.0340 | organism=Leishmania_mexicana_MHOM/GT/2001/U1103 | product=hypothetical protein, conserved | location=LmxM.08:1268703-1283033(+) | length=14331 | sequence_SO=chromosome |	14331
LmxM.08.0350 | organism=Leishmania_mexicana_MHOM/GT/2001/U1103 | product=unspecified product | location=LmxM.08:1284174-1285994(+) | length=1821 | sequence_SO=chromosome | mapping	1821	1730	342	1388	92.7408	LmxM.08.0350 | organism=Leishmania_mexicana_MHOM/GT/2001/U1103 | product=unspecified product | location=LmxM.08:1284174-1285994(+) | length=1821 | sequence_SO=chromosome |	1821
LmxM.08.0360 | organism=Leishmania_mexicana_MHOM/GT/2001/U1103 | product=hypothetical protein, conserved | location=LmxM.08:1288852-1290972(+) | length=2121 | sequence_SO=chromosome | mapping	2121	2122	280	1842	98.438	LmxM.08.0360 | organism=Leishmania_mexicana_MHOM/GT/2001/U1103 | product=hypothetical protein, conserved | location=LmxM.08:1288852-1290972(+) | length=2121 | sequence_SO=chromosome |	2121
LmxM.08.0370 | organism=Leishmania_mexicana_MHOM/GT/2001/U1103 | product=hypothetical protein, conserved | location=LmxM.08:1292406-1293065(+) | length=660 | sequence_SO=chromosome | mapping	660	655	281	374	96.0955	LmxM.08.0370 | organism=Leishmania_mexicana_MHOM/GT/2001/U1103 | product=hypothetical protein, conserved | location=LmxM.08:1292406-1293065(+) | length=660 | sequence_SO=chromosome |	660
LmxM.08.0380 | organism=Leishmania_mexicana_MHOM/GT/2001/U1103 | product=hypothetical protein, conserved | location=LmxM.08:1294145-1299871(+) | length=5727 | sequence_SO=chromosome | mapping	5727	5761	353	5408	99.3129	LmxM.08.0380 | organism=Leishmania_mexicana_MHOM/GT/2001/U1103 | product=hypothetical protein, conserved | location=LmxM.08:1294145-1299871(+) | length=5727 | sequence_SO=chromosome |	5727
LmxM.08.0390 | organism=Leishmania_mexicana_MHOM/GT/2001/U1103 | product=hypothetical protein, conserved | location=LmxM.08:1301644-1306992(+) | length=5349 | sequence_SO=chromosome | mapping	5349	5169	389	4780	95.3898	LmxM.08.0390 | organism=Leishmania_mexicana_MHOM/GT/2001/U1103 | product=hypothetical protein, conserved | location=LmxM.08:1301644-1306992(+) | length=5349 | sequence_SO=chromosome |	5349
LmxM.08.0400 | organism=Leishmania_mexicana_MHOM/GT/2001/U1103 | product=hypothetical protein, conserved | location=LmxM.08:1307933-1311547(+) | length=3615 | sequence_SO=chromosome | mapping	3615	3374	274	3100	91.9272	LmxM.08.0400 | organism=Leishmania_mexicana_MHOM/GT/2001/U1103 | product=hypothetical protein, conserved | location=LmxM.08:1307933-1311547(+) | length=3615 | sequence_SO=chromosome |	3615
LmxM.08.0410 | organism=Leishmania_mexicana_MHOM/GT/2001/U1103 | product=hypothetical protein, conserved | location=LmxM.08:1312212-1316417(+) | length=4206 | sequence_SO=chromosome | mapping	4206	4102	334	3768	96.1557	LmxM.08.0410 | organism=Leishmania_mexicana_MHOM/GT/2001/U1103 | product=hypothetical protein, conserved | location=LmxM.08:1312212-1316417(+) | length=4206 | sequence_SO=chromosome |	4206
LmxM.08.0420 | organism=Leishmania_mexicana_MHOM/GT/2001/U1103 | product=hypothetical protein,conserved | location=LmxM.08:1318941-1324823(+) | length=5883 | sequence_SO=chromosome | mapping	5883	5792	344	5448	96.8188	LmxM.08.0420 | organism=Leishmania_mexicana_MHOM/GT/2001/U1103 | product=hypothetical protein,conserved | location=LmxM.08:1318941-1324823(+) | length=5883 | sequence_SO=chromosome |	5883
LmxM.08.0430 | organism=Leishmania_mexicana_MHOM/GT/2001/U1103 | product=hypothetical protein, conserved | location=LmxM.08:1326182-1328926(+) | length=2745 | sequence_SO=chromosome | mapping	2745	2478	292	2186	88.6689	LmxM.08.0430 | organism=Leishmania_mexicana_MHOM/GT/2001/U1103 | product=hypothetical protein, conserved | location=LmxM.08:1326182-1328926(+) | length=2745 | sequence_SO=chromosome |	2745
LmxM.08.0440 | organism=Leishmania_mexicana_MHOM/GT/2001/U1103 | product=hypothetical protein, conserved | location=LmxM.08:1330201-1337427(+) | length=7227 | sequence_SO=chromosome | mapping	7227	7148	344	6804	97.6306	LmxM.08.0440 | organism=Leishmania_mexicana_MHOM/GT/2001/U1103 | product=hypothetical protein, conserved | location=LmxM.08:1330201-1337427(+) | length=7227 | sequence_SO=chromosome |	7227
LmxM.08.0450 | organism=Leishmania_mexicana_MHOM/GT/2001/U1103 | product=signal peptidase type I, putative,serine peptidase, Clan SF, Family S26A | location=LmxM.08:1338321-1338863(+) | length=543 | sequence_SO=chromosome | mapping	543	519	331	188	92.4843	LmxM.08.0450 | organism=Leishmania_mexicana_MHOM/GT/2001/U1103 | product=signal peptidase type I, putative,serine peptidase, Clan SF, Family S26A | location=LmxM.08:1338321-1338863(+) | length=543 | sequence_SO=chromosome |	543
LmxM.08.0460 | organism=Leishmania_mexicana_MHOM/GT/2001/U1103 | product=hypothetical protein, unknown function | location=LmxM.08:1339869-1340762(+) | length=894 | sequence_SO=chromosome | mapping	894	821	299	522	89.3333	LmxM.08.0460 | organism=Leishmania_mexicana_MHOM/GT/2001/U1103 | product=hypothetical protein, unknown function | location=LmxM.08:1339869-1340762(+) | length=894 | sequence_SO=chromosome |	894
LmxM.08.0470 | organism=Leishmania_mexicana_MHOM/GT/2001/U1103 | product=small ubiquitin protein, putative | location=LmxM.08:1343682-1344035(+) | length=354 | sequence_SO=chromosome | mapping	354	326	290	36	87.6045	LmxM.08.0470 | organism=Leishmania_mexicana_MHOM/GT/2001/U1103 | product=small ubiquitin protein, putative | location=LmxM.08:1343682-1344035(+) | length=354 | sequence_SO=chromosome |	354
LmxM.08.0480 | organism=Leishmania_mexicana_MHOM/GT/2001/U1103 | product=hypothetical protein, conserved | location=LmxM.08:1346638-1347468(+) | length=831 | sequence_SO=chromosome | mapping	831	810	302	508	94.4946	LmxM.08.0480 | organism=Leishmania_mexicana_MHOM/GT/2001/U1103 | product=hypothetical protein, conserved | location=LmxM.08:1346638-1347468(+) | length=831 | sequence_SO=chromosome |	831
LmxM.08.0490 | organism=Leishmania_mexicana_MHOM/GT/2001/U1103 | product=hypothetical protein, conserved | location=LmxM.08:1348687-1349883(+) | length=1197 | sequence_SO=chromosome | mapping	1197	1210	330	880	99.1378	LmxM.08.0490 | organism=Leishmania_mexicana_MHOM/GT/2001/U1103 | product=hypothetical protein, conserved | location=LmxM.08:1348687-1349883(+) | length=1197 | sequence_SO=chromosome |	1197
LmxM.08.0500 | organism=Leishmania_mexicana_MHOM/GT/2001/U1103 | product=hypothetical protein, unknown function | location=LmxM.08:1350706-1351692(+) | length=987 | sequence_SO=chromosome | mapping	987	848	264	584	83.2381	LmxM.08.0500 | organism=Leishmania_mexicana_MHOM/GT/2001/U1103 | product=hypothetical protein, unknown function | location=LmxM.08:1350706-1351692(+) | length=987 | sequence_SO=chromosome |	987
LmxM.08.0510 | organism=Leishmania_mexicana_MHOM/GT/2001/U1103 | product=ribose-phosphate pyrophosphokinase, putative | location=LmxM.08:1352401-1354917(+) | length=2517 | sequence_SO=chromosome | mapping	2517	2405	249	2156	93.9305	LmxM.08.0510 | organism=Leishmania_mexicana_MHOM/GT/2001/U1103 | product=ribose-phosphate pyrophosphokinase, putative | location=LmxM.08:1352401-1354917(+) | length=2517 | sequence_SO=chromosome |	2517
LmxM.08.0520 | organism=Leishmania_mexicana_MHOM/GT/2001/U1103 | product=hypothetical protein, conserved | location=LmxM.08:1357125-1364048(+) | length=6924 | sequence_SO=chromosome | mapping	6924	6791	351	6440	96.7032	LmxM.08.0520 | organism=Leishmania_mexicana_MHOM/GT/2001/U1103 | product=hypothetical protein, conserved | location=LmxM.08:1357125-1364048(+) | length=6924 | sequence_SO=chromosome |	6924
LmxM.08.0530 | organism=Leishmania_mexicana_MHOM/GT/2001/U1103 | product=protein kinase , putative | location=LmxM.08:1365610-1370409(+) | length=4800 | sequence_SO=chromosome | mapping	4800	4825	355	4470	99.2565	LmxM.08.0530 | organism=Leishmania_mexicana_MHOM/GT/2001/U1103 | product=protein kinase , putative | location=LmxM.08:1365610-1370409(+) | length=4800 | sequence_SO=chromosome |	4800
LmxM.08.0540 | organism=Leishmania_mexicana_MHOM/GT/2001/U1103 | product=hypothetical protein, conserved | location=LmxM.08:1371036-1372094(+) | length=1059 | sequence_SO=chromosome | mapping	1059	939	343	596	85.9877	LmxM.08.0540 | organism=Leishmania_mexicana_MHOM/GT/2001/U1103 | product=hypothetical protein, conserved | location=LmxM.08:1371036-1372094(+) | length=1059 | sequence_SO=chromosome |	1059
LmxM.08.0545 | organism=Leishmania_mexicana_MHOM/GT/2001/U1103 | product=cyclopropane-fatty-acyl-phospholipid synthase | location=LmxM.08:1373866-1375332(+) | length=1467 | sequence_SO=chromosome | mapping	1467	1500	366	1134	100.32	LmxM.08.0545 | organism=Leishmania_mexicana_MHOM/GT/2001/U1103 | product=cyclopropane-fatty-acyl-phospholipid synthase | location=LmxM.08:1373866-1375332(+) | length=1467 | sequence_SO=chromosome |	1467
LmxM.08.0550 | organism=Leishmania_mexicana_MHOM/GT/2001/U1103 | product=translation initiation factor-like protein | location=LmxM.08:1377212-1378246(+) | length=1035 | sequence_SO=chromosome | mapping	1035	925	305	620	87.0232	LmxM.08.0550 | organism=Leishmania_mexicana_MHOM/GT/2001/U1103 | product=translation initiation factor-like protein | location=LmxM.08:1377212-1378246(+) | length=1035 | sequence_SO=chromosome |	1035
LmxM.08.0560 | organism=Leishmania_mexicana_MHOM/GT/2001/U1103 | product=hypothetical protein, conserved | location=LmxM.08:1380147-1380860(+) | length=714 | sequence_SO=chromosome | mapping	714	733	311	422	100.401	LmxM.08.0560 | organism=Leishmania_mexicana_MHOM/GT/2001/U1103 | product=hypothetical protein, conserved | location=LmxM.08:1380147-1380860(+) | length=714 | sequence_SO=chromosome |	714
LmxM.08.0570 | organism=Leishmania_mexicana_MHOM/GT/2001/U1103 | product=hypothetical protein, conserved | location=LmxM.08:1382061-1382600(+) | length=540 | sequence_SO=chromosome | mapping	540	500	306	194	88.387	LmxM.08.0570 | organism=Leishmania_mexicana_MHOM/GT/2001/U1103 | product=hypothetical protein, conserved | location=LmxM.08:1382061-1382600(+) | length=540 | sequence_SO=chromosome |	540
LmxM.08.0580 | organism=Leishmania_mexicana_MHOM/GT/2001/U1103 | product=hypothetical protein, unknown function | location=LmxM.08:1385380-1385877(+) | length=498 | sequence_SO=chromosome | mapping	498	482	330	152	92.9659	LmxM.08.0580 | organism=Leishmania_mexicana_MHOM/GT/2001/U1103 | product=hypothetical protein, unknown function | location=LmxM.08:1385380-1385877(+) | length=498 | sequence_SO=chromosome |	498
LmxM.08.0590 | organism=Leishmania_mexicana_MHOM/GT/2001/U1103 | product=hypothetical protein, unknown function | location=LmxM.08:1388072-1388842(+) | length=771 | sequence_SO=chromosome | mapping	723	710	336	374	86.2309	LmxM.08.0590 | organism=Leishmania_mexicana_MHOM/GT/2001/U1103 | product=hypothetical protein, unknown function | location=LmxM.08:1388072-1388842(+) | length=771 | sequence_SO=chromosome |	771
LmxM.08.0600 | organism=Leishmania_mexicana_MHOM/GT/2001/U1103 | product=hypothetical protein, unknown function | location=LmxM.08:1394643-1395074(+) | length=432 | sequence_SO=chromosome | mapping	432	459	361	98	101.812	LmxM.08.0600 | organism=Leishmania_mexicana_MHOM/GT/2001/U1103 | product=hypothetical protein, unknown function | location=LmxM.08:1394643-1395074(+) | length=432 | sequence_SO=chromosome |	432
LmxM.08.0620 | organism=Leishmania_mexicana_MHOM/GT/2001/U1103 | product=hypothetical protein, conserved | location=LmxM.08:1400346-1408859(+) | length=8514 | sequence_SO=chromosome | mapping	8514	8378	442	7936	96.8734	LmxM.08.0620 | organism=Leishmania_mexicana_MHOM/GT/2001/U1103 | product=hypothetical protein, conserved | location=LmxM.08:1400346-1408859(+) | length=8514 | sequence_SO=chromosome |	8514
LmxM.08.0630 | organism=Leishmania_mexicana_MHOM/GT/2001/U1103 | product=hypothetical protein, unknown function | location=LmxM.08:1412159-1418695(+) | length=6537 | sequence_SO=chromosome | mapping	6540	6773	341	6432	102.488	LmxM.08.0630 | organism=Leishmania_mexicana_MHOM/GT/2001/U1103 | product=hypothetical protein, unknown function | location=LmxM.08:1412159-1418695(+) | length=6537 | sequence_SO=chromosome |	6537
LmxM.08.0640 | organism=Leishmania_mexicana_MHOM/GT/2001/U1103 | product=hypothetical protein, unknown function | location=LmxM.08:1420750-1421664(+) | length=915 | sequence_SO=chromosome | mapping	915	1862	730	1132	196.587	LmxM.08.0640 | organism=Leishmania_mexicana_MHOM/GT/2001/U1103 | product=hypothetical protein, unknown function | location=LmxM.08:1420750-1421664(+) | length=915 | sequence_SO=chromosome |	915
LmxM.08.0650 | organism=Leishmania_mexicana_MHOM/GT/2001/U1103 | product=hypothetical protein, unknown function | location=LmxM.08:1427138-1428004(+) | length=867 | sequence_SO=chromosome | mapping	867	879	361	518	98.5467	LmxM.08.0650 | organism=Leishmania_mexicana_MHOM/GT/2001/U1103 | product=hypothetical protein, unknown function | location=LmxM.08:1427138-1428004(+) | length=867 | sequence_SO=chromosome |	867
LmxM.08.0660 | organism=Leishmania_mexicana_MHOM/GT/2001/U1103 | product=protein kinase, putative | location=LmxM.08:1430423-1434442(+) | length=4020 | sequence_SO=chromosome | mapping	4020	4050	352	3698	99.1652	LmxM.08.0660 | organism=Leishmania_mexicana_MHOM/GT/2001/U1103 | product=protein kinase, putative | location=LmxM.08:1430423-1434442(+) | length=4020 | sequence_SO=chromosome |	4020
LmxM.08.0720 | organism=Leishmania_mexicana_MHOM/GT/2001/U1103 | product=amastin-like protein, putative | location=LmxM.08:1451365-1451919(+) | length=555 | sequence_SO=chromosome | mapping	556	169	133	36	29.1279	LmxM.08.0720 | organism=Leishmania_mexicana_MHOM/GT/2001/U1103 | product=amastin-like protein, putative | location=LmxM.08:1451365-1451919(+) | length=555 | sequence_SO=chromosome |	555
LmxM.08.0730 | organism=Leishmania_mexicana_MHOM/GT/2001/U1103 | product=amastin-like protein, putative | location=LmxM.08:1459165-1459791(+) | length=627 | sequence_SO=chromosome | mapping	622	483	349	134	73.3509	LmxM.08.0730 | organism=Leishmania_mexicana_MHOM/GT/2001/U1103 | product=amastin-like protein, putative | location=LmxM.08:1459165-1459791(+) | length=627 | sequence_SO=chromosome |	627
LmxM.08.0740 | organism=Leishmania_mexicana_MHOM/GT/2001/U1103 | product=amastin-like protein, putative | location=LmxM.08:1466064-1466651(+) | length=588 | sequence_SO=chromosome | mapping	588	1041	663	378	168.25	LmxM.08.0740 | organism=Leishmania_mexicana_MHOM/GT/2001/U1103 | product=amastin-like protein, putative | location=LmxM.08:1466064-1466651(+) | length=588 | sequence_SO=chromosome |	588
LmxM.08.0750 | organism=Leishmania_mexicana_MHOM/GT/2001/U1103 | product=amastin-like protein, putative | location=LmxM.08:1471941-1472528(+) | length=588 | sequence_SO=chromosome | mapping	588	1061	825	236	172.604	LmxM.08.0750 | organism=Leishmania_mexicana_MHOM/GT/2001/U1103 | product=amastin-like protein, putative | location=LmxM.08:1471941-1472528(+) | length=588 | sequence_SO=chromosome |	588
LmxM.08.0760 | organism=Leishmania_mexicana_MHOM/GT/2001/U1103 | product=amastin-like protein, putative | location=LmxM.08:1480311-1481084(+) | length=774 | sequence_SO=chromosome | mapping	750	6299	5537	762	779.775	LmxM.08.0760 | organism=Leishmania_mexicana_MHOM/GT/2001/U1103 | product=amastin-like protein, putative | location=LmxM.08:1480311-1481084(+) | length=774 | sequence_SO=chromosome |	774
LmxM.08.0770 | organism=Leishmania_mexicana_MHOM/GT/2001/U1103 | product=amastin-like protein, putative | location=LmxM.08:1486144-1486770(+) | length=627 | sequence_SO=chromosome | mapping	627	999	707	292	155.841	LmxM.08.0770 | organism=Leishmania_mexicana_MHOM/GT/2001/U1103 | product=amastin-like protein, putative | location=LmxM.08:1486144-1486770(+) | length=627 | sequence_SO=chromosome |	627
LmxM.08.0780 | organism=Leishmania_mexicana_MHOM/GT/2001/U1103 | product=tuzin, putative | location=LmxM.08:1439656-1441185(+) | length=1530 | sequence_SO=chromosome | mapping	1530	1690	356	1334	108.393	LmxM.08.0780 | organism=Leishmania_mexicana_MHOM/GT/2001/U1103 | product=tuzin, putative | location=LmxM.08:1439656-1441185(+) | length=1530 | sequence_SO=chromosome |	1530
LmxM.08.0790 | organism=Leishmania_mexicana_MHOM/GT/2001/U1103 | product=tuzin, putative | location=LmxM.08:1442512-1444419(+) | length=1908 | sequence_SO=chromosome | mapping	1908	2322	494	1828	118.98	LmxM.08.0790 | organism=Leishmania_mexicana_MHOM/GT/2001/U1103 | product=tuzin, putative | location=LmxM.08:1442512-1444419(+) | length=1908 | sequence_SO=chromosome |	1908
LmxM.08.0790a | organism=Leishmania_mexicana_MHOM/GT/2001/U1103 | product=unspecified product | location=LmxM.00:277633-278205(+) | length=573 | sequence_SO=random_sequence | mapping	573	2641	1717	924	439.845	LmxM.08.0790a | organism=Leishmania_mexicana_MHOM/GT/2001/U1103 | product=unspecified product | location=LmxM.00:277633-278205(+) | length=573 | sequence_SO=random_sequence |	573
LmxM.08.0800 | organism=Leishmania_mexicana_MHOM/GT/2001/U1103 | product=amastin-like protein, putative | location=LmxM.08:1447877-1448404(+) | length=528 | sequence_SO=chromosome | mapping	528	576	334	242	104.193	LmxM.08.0800 | organism=Leishmania_mexicana_MHOM/GT/2001/U1103 | product=amastin-like protein, putative | location=LmxM.08:1447877-1448404(+) | length=528 | sequence_SO=chromosome |	528
LmxM.08.0801 | organism=Leishmania_mexicana_MHOM/GT/2001/U1103 | product=unspecified product | location=LmxM.08:1497721-1498788(+) | length=1068 | sequence_SO=chromosome | mapping	1068	1019	237	782	93.1236	LmxM.08.0801 | organism=Leishmania_mexicana_MHOM/GT/2001/U1103 | product=unspecified product | location=LmxM.08:1497721-1498788(+) | length=1068 | sequence_SO=chromosome |	1068
LmxM.08.0810 | organism=Leishmania_mexicana_MHOM/GT/2001/U1103 | product=unspecified product | location=LmxM.08:1500711-1501205(+) | length=495 | sequence_SO=chromosome | mapping	495	466	280	186	90.6303	LmxM.08.0810 | organism=Leishmania_mexicana_MHOM/GT/2001/U1103 | product=unspecified product | location=LmxM.08:1500711-1501205(+) | length=495 | sequence_SO=chromosome |	495
LmxM.08.0840 | organism=Leishmania_mexicana_MHOM/GT/2001/U1103 | product=amastin-like protein, putative | location=LmxM.08:1507447-1508028(+) | length=582 | sequence_SO=chromosome | mapping	582	2446	1274	1172	407.179	LmxM.08.0840 | organism=Leishmania_mexicana_MHOM/GT/2001/U1103 | product=amastin-like protein, putative | location=LmxM.08:1507447-1508028(+) | length=582 | sequence_SO=chromosome |	582
LmxM.08.0850 | organism=Leishmania_mexicana_MHOM/GT/2001/U1103 | product=amastin-like protein, putative | location=LmxM.08:1512152-1512730(+) | length=579 | sequence_SO=chromosome | mapping	579	1285	677	608	214.166	LmxM.08.0850 | organism=Leishmania_mexicana_MHOM/GT/2001/U1103 | product=amastin-like protein, putative | location=LmxM.08:1512152-1512730(+) | length=579 | sequence_SO=chromosome |	579
LmxM.08.0860 | organism=Leishmania_mexicana_MHOM/GT/2001/U1103 | product=hypothetical protein, unknown function | location=LmxM.08:1516206-1517078(+) | length=873 | sequence_SO=chromosome | mapping	873	864	338	526	96.417	LmxM.08.0860 | organism=Leishmania_mexicana_MHOM/GT/2001/U1103 | product=hypothetical protein, unknown function | location=LmxM.08:1516206-1517078(+) | length=873 | sequence_SO=chromosome |	873
LmxM.08.0870 | organism=Leishmania_mexicana_MHOM/GT/2001/U1103 | product=hypothetical protein, unknown function | location=LmxM.08:1520421-1521680(-) | length=1260 | sequence_SO=chromosome | mapping	1260	1327	299	1028	102.598	LmxM.08.0870 | organism=Leishmania_mexicana_MHOM/GT/2001/U1103 | product=hypothetical protein, unknown function | location=LmxM.08:1520421-1521680(-) | length=1260 | sequence_SO=chromosome |	1260
LmxM.08.0880 | organism=Leishmania_mexicana_MHOM/GT/2001/U1103 | product=hypothetical protein, conserved | location=LmxM.08:1523224-1524735(-) | length=1512 | sequence_SO=chromosome | mapping	1512	1431	311	1120	92.3922	LmxM.08.0880 | organism=Leishmania_mexicana_MHOM/GT/2001/U1103 | product=hypothetical protein, conserved | location=LmxM.08:1523224-1524735(-) | length=1512 | sequence_SO=chromosome |	1512
LmxM.08.0890 | organism=Leishmania_mexicana_MHOM/GT/2001/U1103 | product=mitochondrial DNA polymerase beta | location=LmxM.08:1526607-1527737(-) | length=1131 | sequence_SO=chromosome | mapping	1131	1320	388	932	114.315	LmxM.08.0890 | organism=Leishmania_mexicana_MHOM/GT/2001/U1103 | product=mitochondrial DNA polymerase beta | location=LmxM.08:1526607-1527737(-) | length=1131 | sequence_SO=chromosome |	1131
LmxM.08.0900 | organism=Leishmania_mexicana_MHOM/GT/2001/U1103 | product=mitochondrial DNA polymerase beta-PAK, putative | location=LmxM.08:1529162-1531183(-) | length=2022 | sequence_SO=chromosome | mapping	2022	2059	319	1740	100.235	LmxM.08.0900 | organism=Leishmania_mexicana_MHOM/GT/2001/U1103 | product=mitochondrial DNA polymerase beta-PAK, putative | location=LmxM.08:1529162-1531183(-) | length=2022 | sequence_SO=chromosome |	2022
LmxM.08.0910 | organism=Leishmania_mexicana_MHOM/GT/2001/U1103 | product=hypothetical protein, conserved | location=LmxM.08:1535637-1541963(-) | length=6327 | sequence_SO=chromosome | mapping	6327	6667	355	6312	104.006	LmxM.08.0910 | organism=Leishmania_mexicana_MHOM/GT/2001/U1103 | product=hypothetical protein, conserved | location=LmxM.08:1535637-1541963(-) | length=6327 | sequence_SO=chromosome |	6327
LmxM.08.0920 | organism=Leishmania_mexicana_MHOM/GT/2001/U1103 | product=hypothetical protein, conserved | location=LmxM.08:1543289-1543903(-) | length=615 | sequence_SO=chromosome | mapping	615	591	327	264	92.4455	LmxM.08.0920 | organism=Leishmania_mexicana_MHOM/GT/2001/U1103 | product=hypothetical protein, conserved | location=LmxM.08:1543289-1543903(-) | length=615 | sequence_SO=chromosome |	615
LmxM.08.0930 | organism=Leishmania_mexicana_MHOM/GT/2001/U1103 | product=protein kinase, putative | location=LmxM.08:1548118-1551600(-) | length=3483 | sequence_SO=chromosome | mapping	3483	3581	337	3244	101.227	LmxM.08.0930 | organism=Leishmania_mexicana_MHOM/GT/2001/U1103 | product=protein kinase, putative | location=LmxM.08:1548118-1551600(-) | length=3483 | sequence_SO=chromosome |	3483
LmxM.08.0940 | organism=Leishmania_mexicana_MHOM/GT/2001/U1103 | product=hypothetical protein, conserved | location=LmxM.08:1552513-1553316(-) | length=804 | sequence_SO=chromosome | mapping	804	718	334	384	86.6318	LmxM.08.0940 | organism=Leishmania_mexicana_MHOM/GT/2001/U1103 | product=hypothetical protein, conserved | location=LmxM.08:1552513-1553316(-) | length=804 | sequence_SO=chromosome |	804
LmxM.08.0950 | organism=Leishmania_mexicana_MHOM/GT/2001/U1103 | product=hypothetical protein, conserved | location=LmxM.08:1554177-1554617(-) | length=441 | sequence_SO=chromosome | mapping	441	431	315	116	93.805	LmxM.08.0950 | organism=Leishmania_mexicana_MHOM/GT/2001/U1103 | product=hypothetical protein, conserved | location=LmxM.08:1554177-1554617(-) | length=441 | sequence_SO=chromosome |	441
LmxM.08.0960 | organism=Leishmania_mexicana_MHOM/GT/2001/U1103 | product=hypothetical protein, conserved | location=LmxM.08:1556090-1557787(-) | length=1698 | sequence_SO=chromosome | mapping	1698	1728	288	1440	100.253	LmxM.08.0960 | organism=Leishmania_mexicana_MHOM/GT/2001/U1103 | product=hypothetical protein, conserved | location=LmxM.08:1556090-1557787(-) | length=1698 | sequence_SO=chromosome |	1698
LmxM.08.0970 | organism=Leishmania_mexicana_MHOM/GT/2001/U1103 | product=hypothetical protein, conserved | location=LmxM.08:1559336-1561441(-) | length=2106 | sequence_SO=chromosome | mapping	2106	2145	283	1862	100.314	LmxM.08.0970 | organism=Leishmania_mexicana_MHOM/GT/2001/U1103 | product=hypothetical protein, conserved | location=LmxM.08:1559336-1561441(-) | length=2106 | sequence_SO=chromosome |	2106
LmxM.08.0980 | organism=Leishmania_mexicana_MHOM/GT/2001/U1103 | product=hypothetical protein, unknown function | location=LmxM.08:1566886-1570017(-) | length=3132 | sequence_SO=chromosome | mapping	3132	3234	332	2902	101.508	LmxM.08.0980 | organism=Leishmania_mexicana_MHOM/GT/2001/U1103 | product=hypothetical protein, unknown function | location=LmxM.08:1566886-1570017(-) | length=3132 | sequence_SO=chromosome |	3132
LmxM.08.0990 | organism=Leishmania_mexicana_MHOM/GT/2001/U1103 | product=hypothetical protein, conserved | location=LmxM.08:1571110-1572090(-) | length=981 | sequence_SO=chromosome | mapping	981	814	354	460	80.8206	LmxM.08.0990 | organism=Leishmania_mexicana_MHOM/GT/2001/U1103 | product=hypothetical protein, conserved | location=LmxM.08:1571110-1572090(-) | length=981 | sequence_SO=chromosome |	981
LmxM.08.1000 | organism=Leishmania_mexicana_MHOM/GT/2001/U1103 | product=hypothetical protein, conserved | location=LmxM.08:1572765-1580129(-) | length=7365 | sequence_SO=chromosome | mapping	7368	7838	380	7458	105.156	LmxM.08.1000 | organism=Leishmania_mexicana_MHOM/GT/2001/U1103 | product=hypothetical protein, conserved | location=LmxM.08:1572765-1580129(-) | length=7365 | sequence_SO=chromosome |	7365
LmxM.08.1030 | organism=Leishmania_mexicana_MHOM/GT/2001/U1103 | product=unspecified product | location=LmxM.00:195593-196303(-) | length=711 | sequence_SO=random_sequence | mapping	660	719	357	362	97.4965	LmxM.08.1030 | organism=Leishmania_mexicana_MHOM/GT/2001/U1103 | product=unspecified product | location=LmxM.00:195593-196303(-) | length=711 | sequence_SO=random_sequence |	711
LmxM.08.1030a | organism=Leishmania_mexicana_MHOM/GT/2001/U1103 | product=unspecified product | location=LmxM.00:282437-284038(-) | length=1602 | sequence_SO=random_sequence | mapping	1602	11813	3343	8470	714.447	LmxM.08.1030a | organism=Leishmania_mexicana_MHOM/GT/2001/U1103 | product=unspecified product | location=LmxM.00:282437-284038(-) | length=1602 | sequence_SO=random_sequence |	1602
LmxM.08.1040 | organism=Leishmania_mexicana_MHOM/GT/2001/U1103 | product=unspecified product | location=LmxM.00:226408-227919(-) | length=1512 | sequence_SO=random_sequence | mapping	1511	5323	1341	3982	342.715	LmxM.08.1040 | organism=Leishmania_mexicana_MHOM/GT/2001/U1103 | product=unspecified product | location=LmxM.00:226408-227919(-) | length=1512 | sequence_SO=random_sequence |	1512
LmxM.08.1040a | organism=Leishmania_mexicana_MHOM/GT/2001/U1103 | product=unspecified product | location=LmxM.00:280819-281085(-) | length=267 | sequence_SO=random_sequence | mapping	256	50	50	0	18.3446	LmxM.08.1040a | organism=Leishmania_mexicana_MHOM/GT/2001/U1103 | product=unspecified product | location=LmxM.00:280819-281085(-) | length=267 | sequence_SO=random_sequence |	267
LmxM.08.1040b | organism=Leishmania_mexicana_MHOM/GT/2001/U1103 | product=unspecified product | location=LmxM.00:499863-500942(-) | length=1080 | sequence_SO=random_sequence | mapping	1080	681	267	414	61.0583	LmxM.08.1040b | organism=Leishmania_mexicana_MHOM/GT/2001/U1103 | product=unspecified product | location=LmxM.00:499863-500942(-) | length=1080 | sequence_SO=random_sequence |	1080
LmxM.08.1040c | organism=Leishmania_mexicana_MHOM/GT/2001/U1103 | product=unspecified product | location=LmxM.00:193254-194249(-) | length=996 | sequence_SO=random_sequence | mapping	996	1382	166	1216	136.775	LmxM.08.1040c | organism=Leishmania_mexicana_MHOM/GT/2001/U1103 | product=unspecified product | location=LmxM.00:193254-194249(-) | length=996 | sequence_SO=random_sequence |	996
LmxM.08.1050 | organism=Leishmania_mexicana_MHOM/GT/2001/U1103 | product=unspecified product | location=LmxM.00:224368-225060(-) | length=693 | sequence_SO=random_sequence | mapping	628	285	61	224	40.6089	LmxM.08.1050 | organism=Leishmania_mexicana_MHOM/GT/2001/U1103 | product=unspecified product | location=LmxM.00:224368-225060(-) | length=693 | sequence_SO=random_sequence |	693
LmxM.08.1050a | organism=Leishmania_mexicana_MHOM/GT/2001/U1103 | product=unspecified product | location=LmxM.00:497905-498201(-) | length=297 | sequence_SO=random_sequence | mapping	269	71	59	12	23.0673	LmxM.08.1050a | organism=Leishmania_mexicana_MHOM/GT/2001/U1103 | product=unspecified product | location=LmxM.00:497905-498201(-) | length=297 | sequence_SO=random_sequence |	297
LmxM.08.1060 | organism=Leishmania_mexicana_MHOM/GT/2001/U1103 | product=cathepsin L-like protease, putative | location=LmxM.08:1582805-1583905(-) | length=1101 | sequence_SO=chromosome | mapping	1101	2243	223	2020	201.323	LmxM.08.1060 | organism=Leishmania_mexicana_MHOM/GT/2001/U1103 | product=cathepsin L-like protease, putative | location=LmxM.08:1582805-1583905(-) | length=1101 | sequence_SO=chromosome |	1101
LmxM.08.1070 | organism=Leishmania_mexicana_MHOM/GT/2001/U1103 | product=cathepsin L-like protease, putative | location=LmxM.08:1585249-1586580(-) | length=1332 | sequence_SO=chromosome | mapping	1332	3132	598	2534	231.151	LmxM.08.1070 | organism=Leishmania_mexicana_MHOM/GT/2001/U1103 | product=cathepsin L-like protease, putative | location=LmxM.08:1585249-1586580(-) | length=1332 | sequence_SO=chromosome |	1332
LmxM.08.1070partial | organism=Leishmania_mexicana_MHOM/GT/2001/U1103 | product=unspecified product | location=LmxM.00:480658-481785(-) | length=1128 | sequence_SO=random_sequence | mapping	1128	1504	384	1120	130.301	LmxM.08.1070partial | organism=Leishmania_mexicana_MHOM/GT/2001/U1103 | product=unspecified product | location=LmxM.00:480658-481785(-) | length=1128 | sequence_SO=random_sequence |	1128
LmxM.08.1080 | organism=Leishmania_mexicana_MHOM/GT/2001/U1103 | product=cathepsin L-like protease, putative | location=LmxM.08:1589089-1590168(-) | length=1080 | sequence_SO=chromosome | mapping	1080	896	300	596	80.7028	LmxM.08.1080 | organism=Leishmania_mexicana_MHOM/GT/2001/U1103 | product=cathepsin L-like protease, putative | location=LmxM.08:1589089-1590168(-) | length=1080 | sequence_SO=chromosome |	1080
LmxM.08.1090 | organism=Leishmania_mexicana_MHOM/GT/2001/U1103 | product=histone deacetylase, putative | location=LmxM.08:1591009-1592832(-) | length=1824 | sequence_SO=chromosome | mapping	1824	1826	364	1462	98.3651	LmxM.08.1090 | organism=Leishmania_mexicana_MHOM/GT/2001/U1103 | product=histone deacetylase, putative | location=LmxM.08:1591009-1592832(-) | length=1824 | sequence_SO=chromosome |	1824
LmxM.08.1091 | organism=Leishmania_mexicana_MHOM/GT/2001/U1103 | product=hypothetical protein, conserved | location=LmxM.08:1604178-1605269(+) | length=1092 | sequence_SO=chromosome | mapping	1092	1379	421	958	123.908	LmxM.08.1091 | organism=Leishmania_mexicana_MHOM/GT/2001/U1103 | product=hypothetical protein, conserved | location=LmxM.08:1604178-1605269(+) | length=1092 | sequence_SO=chromosome |	1092
LmxM.08.1100 | organism=Leishmania_mexicana_MHOM/GT/2001/U1103 | product=hypothetical protein, conserved | location=LmxM.08:1606778-1607875(+) | length=1098 | sequence_SO=chromosome | mapping	1098	1197	403	794	106.471	LmxM.08.1100 | organism=Leishmania_mexicana_MHOM/GT/2001/U1103 | product=hypothetical protein, conserved | location=LmxM.08:1606778-1607875(+) | length=1098 | sequence_SO=chromosome |	1098
LmxM.08.1110 | organism=Leishmania_mexicana_MHOM/GT/2001/U1103 | product=stress-induced protein sti1 | location=LmxM.08:1608858-1610495(+) | length=1638 | sequence_SO=chromosome | mapping	1638	1720	368	1352	103.186	LmxM.08.1110 | organism=Leishmania_mexicana_MHOM/GT/2001/U1103 | product=stress-induced protein sti1 | location=LmxM.08:1608858-1610495(+) | length=1638 | sequence_SO=chromosome |	1638
LmxM.08.1120 | organism=Leishmania_mexicana_MHOM/GT/2001/U1103 | product=hypothetical protein, conserved | location=LmxM.08:1612165-1614750(+) | length=2586 | sequence_SO=chromosome | mapping	2586	2482	304	2178	94.3291	LmxM.08.1120 | organism=Leishmania_mexicana_MHOM/GT/2001/U1103 | product=hypothetical protein, conserved | location=LmxM.08:1612165-1614750(+) | length=2586 | sequence_SO=chromosome |	2586
LmxM.08.1130 | organism=Leishmania_mexicana_MHOM/GT/2001/U1103 | product=phosphoribosylpyrophosphate synthetase | location=LmxM.08:1616547-1617662(+) | length=1116 | sequence_SO=chromosome | mapping	1116	1145	321	824	100.378	LmxM.08.1130 | organism=Leishmania_mexicana_MHOM/GT/2001/U1103 | product=phosphoribosylpyrophosphate synthetase | location=LmxM.08:1616547-1617662(+) | length=1116 | sequence_SO=chromosome |	1116
LmxM.08.1140 | organism=Leishmania_mexicana_MHOM/GT/2001/U1103 | product=hypothetical protein, conserved | location=LmxM.08:1619189-1622029(+) | length=2841 | sequence_SO=chromosome | mapping	2841	2927	303	2624	101.403	LmxM.08.1140 | organism=Leishmania_mexicana_MHOM/GT/2001/U1103 | product=hypothetical protein, conserved | location=LmxM.08:1619189-1622029(+) | length=2841 | sequence_SO=chromosome |	2841
LmxM.08.1150 | organism=Leishmania_mexicana_MHOM/GT/2001/U1103 | product=hypothetical protein, conserved | location=LmxM.08:1622959-1626393(+) | length=3435 | sequence_SO=chromosome | mapping	3435	3640	380	3260	104.478	LmxM.08.1150 | organism=Leishmania_mexicana_MHOM/GT/2001/U1103 | product=hypothetical protein, conserved | location=LmxM.08:1622959-1626393(+) | length=3435 | sequence_SO=chromosome |	3435
LmxM.08.1160 | organism=Leishmania_mexicana_MHOM/GT/2001/U1103 | product=hypothetical protein, conserved | location=LmxM.08:1627547-1628827(+) | length=1281 | sequence_SO=chromosome | mapping	1281	1374	318	1056	104.565	LmxM.08.1160 | organism=Leishmania_mexicana_MHOM/GT/2001/U1103 | product=hypothetical protein, conserved | location=LmxM.08:1627547-1628827(+) | length=1281 | sequence_SO=chromosome |	1281
LmxM.08.1170 | organism=Leishmania_mexicana_MHOM/GT/2001/U1103 | product=hypothetical protein, conserved | location=LmxM.08:1630214-1631542(+) | length=1329 | sequence_SO=chromosome | mapping	1329	1341	299	1042	98.9458	LmxM.08.1170 | organism=Leishmania_mexicana_MHOM/GT/2001/U1103 | product=hypothetical protein, conserved | location=LmxM.08:1630214-1631542(+) | length=1329 | sequence_SO=chromosome |	1329
LmxM.08.1171 | organism=Leishmania_mexicana_MHOM/GT/2001/U1103 | product=unspecified product | location=LmxM.08:1668001-1669332(-) | length=1332 | sequence_SO=chromosome | mapping	1332	4059	647	3412	299.331	LmxM.08.1171 | organism=Leishmania_mexicana_MHOM/GT/2001/U1103 | product=unspecified product | location=LmxM.08:1668001-1669332(-) | length=1332 | sequence_SO=chromosome |	1332
LmxM.08.1180 | organism=Leishmania_mexicana_MHOM/GT/2001/U1103 | product=hypothetical protein, conserved | location=LmxM.08:1632651-1633907(+) | length=1257 | sequence_SO=chromosome | mapping	1257	1295	377	918	100.628	LmxM.08.1180 | organism=Leishmania_mexicana_MHOM/GT/2001/U1103 | product=hypothetical protein, conserved | location=LmxM.08:1632651-1633907(+) | length=1257 | sequence_SO=chromosome |	1257
LmxM.08.1190 | organism=Leishmania_mexicana_MHOM/GT/2001/U1103 | product=hypothetical protein, conserved | location=LmxM.08:1634699-1638442(+) | length=3744 | sequence_SO=chromosome | mapping	3744	3864	338	3526	102.04	LmxM.08.1190 | organism=Leishmania_mexicana_MHOM/GT/2001/U1103 | product=hypothetical protein, conserved | location=LmxM.08:1634699-1638442(+) | length=3744 | sequence_SO=chromosome |	3744
LmxM.08.1200 | organism=Leishmania_mexicana_MHOM/GT/2001/U1103 | product=hypothetical protein, conserved | location=LmxM.08:1639475-1640062(+) | length=588 | sequence_SO=chromosome | mapping	588	660	362	298	107.862	LmxM.08.1200 | organism=Leishmania_mexicana_MHOM/GT/2001/U1103 | product=hypothetical protein, conserved | location=LmxM.08:1639475-1640062(+) | length=588 | sequence_SO=chromosome |	588
LmxM.08.1210 | organism=Leishmania_mexicana_MHOM/GT/2001/U1103 | product=hypothetical protein, conserved | location=LmxM.08:1644000-1645172(+) | length=1173 | sequence_SO=chromosome | mapping	1173	1214	356	858	100.886	LmxM.08.1210 | organism=Leishmania_mexicana_MHOM/GT/2001/U1103 | product=hypothetical protein, conserved | location=LmxM.08:1644000-1645172(+) | length=1173 | sequence_SO=chromosome |	1173
LmxM.08.1215 | organism=Leishmania_mexicana_MHOM/GT/2001/U1103 | product=hypothetical protein, conserved | location=LmxM.08:1646961-1648481(+) | length=1521 | sequence_SO=chromosome | mapping	1521	3002	644	2358	193.533	LmxM.08.1215 | organism=Leishmania_mexicana_MHOM/GT/2001/U1103 | product=hypothetical protein, conserved | location=LmxM.08:1646961-1648481(+) | length=1521 | sequence_SO=chromosome |	1521
LmxM.08.1218 | organism=Leishmania_mexicana_MHOM/GT/2001/U1103 | product=hypothetical protein, conserved | location=LmxM.08:1649792-1651324(+) | length=1533 | sequence_SO=chromosome | mapping	1533	2952	684	2268	187.912	LmxM.08.1218 | organism=Leishmania_mexicana_MHOM/GT/2001/U1103 | product=hypothetical protein, conserved | location=LmxM.08:1649792-1651324(+) | length=1533 | sequence_SO=chromosome |	1533
LmxM.08.1222 | organism=Leishmania_mexicana_MHOM/GT/2001/U1103 | product=hypothetical protein, conserved | location=LmxM.08:1652590-1652889(+) | length=300 | sequence_SO=chromosome | mapping	300	570	522	48	178.88	LmxM.08.1222 | organism=Leishmania_mexicana_MHOM/GT/2001/U1103 | product=hypothetical protein, conserved | location=LmxM.08:1652590-1652889(+) | length=300 | sequence_SO=chromosome |	300
LmxM.08.1223 | organism=Leishmania_mexicana_MHOM/GT/2001/U1103 | product=hypothetical protein, unknown function | location=LmxM.08:1654119-1655759(+) | length=1641 | sequence_SO=chromosome | mapping	1641	3107	643	2464	184.403	LmxM.08.1223 | organism=Leishmania_mexicana_MHOM/GT/2001/U1103 | product=hypothetical protein, unknown function | location=LmxM.08:1654119-1655759(+) | length=1641 | sequence_SO=chromosome |	1641
LmxM.08.1225 | organism=Leishmania_mexicana_MHOM/GT/2001/U1103 | product=hypothetical protein, unknown function | location=LmxM.08:1656301-1657017(+) | length=717 | sequence_SO=chromosome | mapping	717	1287	649	638	174.079	LmxM.08.1225 | organism=Leishmania_mexicana_MHOM/GT/2001/U1103 | product=hypothetical protein, unknown function | location=LmxM.08:1656301-1657017(+) | length=717 | sequence_SO=chromosome |	717
LmxM.08.1228 | organism=Leishmania_mexicana_MHOM/GT/2001/U1103 | product=unspecified product | location=LmxM.08:1660241-1662778(+) | length=2538 | sequence_SO=chromosome | mapping	2538	4966	692	4274	192.271	LmxM.08.1228 | organism=Leishmania_mexicana_MHOM/GT/2001/U1103 | product=unspecified product | location=LmxM.08:1660241-1662778(+) | length=2538 | sequence_SO=chromosome |	2538
LmxM.08.1230 | organism=Leishmania_mexicana_MHOM/GT/2001/U1103 | product=beta tubulin | location=LmxM.08:1664002-1665246(+) | length=1245 | sequence_SO=chromosome | mapping	1225	2174	538	1636	171.513	LmxM.08.1230 | organism=Leishmania_mexicana_MHOM/GT/2001/U1103 | product=beta tubulin | location=LmxM.08:1664002-1665246(+) | length=1245 | sequence_SO=chromosome |	1245
LmxM.08_29.0010 | organism=Leishmania_mexicana_MHOM/GT/2001/U1103 | product=3,2-trans-enoyl-CoA isomerase, mitochondrial precursor-like protein | location=LmxM.08:1155220-1156110(+) | length=891 | sequence_SO=chromosome | mapping	891	738	212	526	80.6184	LmxM.08_29.0010 | organism=Leishmania_mexicana_MHOM/GT/2001/U1103 | product=3,2-trans-enoyl-CoA isomerase, mitochondrial precursor-like protein | location=LmxM.08:1155220-1156110(+) | length=891 | sequence_SO=chromosome |	891
LmxM.08_29.0020 | organism=Leishmania_mexicana_MHOM/GT/2001/U1103 | product=transcription factor-like protein | location=LmxM.08:1149821-1152958(+) | length=3138 | sequence_SO=chromosome | mapping	3141	2817	317	2500	88.1017	LmxM.08_29.0020 | organism=Leishmania_mexicana_MHOM/GT/2001/U1103 | product=transcription factor-like protein | location=LmxM.08:1149821-1152958(+) | length=3138 | sequence_SO=chromosome |	3138
LmxM.08_29.0030 | organism=Leishmania_mexicana_MHOM/GT/2001/U1103 | product=ribosomal protein L3-like protein | location=LmxM.08:1147467-1148870(+) | length=1404 | sequence_SO=chromosome | mapping	1404	1266	274	992	88.2329	LmxM.08_29.0030 | organism=Leishmania_mexicana_MHOM/GT/2001/U1103 | product=ribosomal protein L3-like protein | location=LmxM.08:1147467-1148870(+) | length=1404 | sequence_SO=chromosome |	1404
LmxM.08_29.0040 | organism=Leishmania_mexicana_MHOM/GT/2001/U1103 | product=hypothetical protein, conserved | location=LmxM.08:1145570-1146433(+) | length=864 | sequence_SO=chromosome | mapping	864	827	341	486	93.2847	LmxM.08_29.0040 | organism=Leishmania_mexicana_MHOM/GT/2001/U1103 | product=hypothetical protein, conserved | location=LmxM.08:1145570-1146433(+) | length=864 | sequence_SO=chromosome |	864
LmxM.08_29.0050 | organism=Leishmania_mexicana_MHOM/GT/2001/U1103 | product=hypothetical protein, conserved | location=LmxM.08:1142367-1144385(+) | length=2019 | sequence_SO=chromosome | mapping	2019	1850	358	1492	89.8583	LmxM.08_29.0050 | organism=Leishmania_mexicana_MHOM/GT/2001/U1103 | product=hypothetical protein, conserved | location=LmxM.08:1142367-1144385(+) | length=2019 | sequence_SO=chromosome |	2019
LmxM.08_29.0060 | organism=Leishmania_mexicana_MHOM/GT/2001/U1103 | product=tryptophanyl-tRNA synthetase, putative | location=LmxM.08:1140297-1141487(+) | length=1191 | sequence_SO=chromosome | mapping	1191	1105	323	782	90.7431	LmxM.08_29.0060 | organism=Leishmania_mexicana_MHOM/GT/2001/U1103 | product=tryptophanyl-tRNA synthetase, putative | location=LmxM.08:1140297-1141487(+) | length=1191 | sequence_SO=chromosome |	1191
LmxM.08_29.0070 | organism=Leishmania_mexicana_MHOM/GT/2001/U1103 | product=syntaxin, putative | location=LmxM.08:1138230-1138994(+) | length=765 | sequence_SO=chromosome | mapping	765	735	307	428	93.6353	LmxM.08_29.0070 | organism=Leishmania_mexicana_MHOM/GT/2001/U1103 | product=syntaxin, putative | location=LmxM.08:1138230-1138994(+) | length=765 | sequence_SO=chromosome |	765
LmxM.08_29.0080 | organism=Leishmania_mexicana_MHOM/GT/2001/U1103 | product=hypothetical protein, conserved | location=LmxM.08:1137130-1137504(+) | length=375 | sequence_SO=chromosome | mapping	375	316	278	38	79.9333	LmxM.08_29.0080 | organism=Leishmania_mexicana_MHOM/GT/2001/U1103 | product=hypothetical protein, conserved | location=LmxM.08:1137130-1137504(+) | length=375 | sequence_SO=chromosome |	375
LmxM.08_29.0090 | organism=Leishmania_mexicana_MHOM/GT/2001/U1103 | product=GTP-binding protein-like protein | location=LmxM.08:1135950-1136510(+) | length=561 | sequence_SO=chromosome | mapping	561	565	341	224	97.3708	LmxM.08_29.0090 | organism=Leishmania_mexicana_MHOM/GT/2001/U1103 | product=GTP-binding protein-like protein | location=LmxM.08:1135950-1136510(+) | length=561 | sequence_SO=chromosome |	561
LmxM.08_29.0100 | organism=Leishmania_mexicana_MHOM/GT/2001/U1103 | product=hypothetical protein, conserved | location=LmxM.08:1132432-1134042(+) | length=1611 | sequence_SO=chromosome | mapping	1611	1616	296	1320	98.4922	LmxM.08_29.0100 | organism=Leishmania_mexicana_MHOM/GT/2001/U1103 | product=hypothetical protein, conserved | location=LmxM.08:1132432-1134042(+) | length=1611 | sequence_SO=chromosome |	1611
LmxM.08_29.0110 | organism=Leishmania_mexicana_MHOM/GT/2001/U1103 | product=hypothetical protein, conserved | location=LmxM.08:1122592-1131114(+) | length=8523 | sequence_SO=chromosome | mapping	8523	8071	651	7420	91.8111	LmxM.08_29.0110 | organism=Leishmania_mexicana_MHOM/GT/2001/U1103 | product=hypothetical protein, conserved | location=LmxM.08:1122592-1131114(+) | length=8523 | sequence_SO=chromosome |	8523
LmxM.08_29.0120 | organism=Leishmania_mexicana_MHOM/GT/2001/U1103 | product=proteasome regulatory non-ATPase subunit, putative | location=LmxM.08:1117116-1119845(+) | length=2730 | sequence_SO=chromosome | mapping	2730	2601	347	2254	93.7802	LmxM.08_29.0120 | organism=Leishmania_mexicana_MHOM/GT/2001/U1103 | product=proteasome regulatory non-ATPase subunit, putative | location=LmxM.08:1117116-1119845(+) | length=2730 | sequence_SO=chromosome |	2730
LmxM.08_29.0130 | organism=Leishmania_mexicana_MHOM/GT/2001/U1103 | product=hypothetical protein, conserved | location=LmxM.08:1113394-1115889(+) | length=2496 | sequence_SO=chromosome | mapping	2496	2589	321	2268	102.124	LmxM.08_29.0130 | organism=Leishmania_mexicana_MHOM/GT/2001/U1103 | product=hypothetical protein, conserved | location=LmxM.08:1113394-1115889(+) | length=2496 | sequence_SO=chromosome |	2496
LmxM.08_29.0140 | organism=Leishmania_mexicana_MHOM/GT/2001/U1103 | product=DNA-directed RNA polymerase I-like protein | location=LmxM.08:1111434-1112447(+) | length=1014 | sequence_SO=chromosome | mapping	1014	921	303	618	88.4408	LmxM.08_29.0140 | organism=Leishmania_mexicana_MHOM/GT/2001/U1103 | product=DNA-directed RNA polymerase I-like protein | location=LmxM.08:1111434-1112447(+) | length=1014 | sequence_SO=chromosome |	1014
LmxM.08_29.0150 | organism=Leishmania_mexicana_MHOM/GT/2001/U1103 | product=hypothetical protein, conserved | location=LmxM.08:1108030-1110108(+) | length=2079 | sequence_SO=chromosome | mapping	2079	1981	321	1660	94.1193	LmxM.08_29.0150 | organism=Leishmania_mexicana_MHOM/GT/2001/U1103 | product=hypothetical protein, conserved | location=LmxM.08:1108030-1110108(+) | length=2079 | sequence_SO=chromosome |	2079
LmxM.08_29.0160 | organism=Leishmania_mexicana_MHOM/GT/2001/U1103 | product=hypothetical protein, conserved | location=LmxM.08:1105487-1107196(+) | length=1710 | sequence_SO=chromosome | mapping	1710	1636	342	1294	93.8392	LmxM.08_29.0160 | organism=Leishmania_mexicana_MHOM/GT/2001/U1103 | product=hypothetical protein, conserved | location=LmxM.08:1105487-1107196(+) | length=1710 | sequence_SO=chromosome |	1710
LmxM.08_29.0170 | organism=Leishmania_mexicana_MHOM/GT/2001/U1103 | product=hypothetical protein, conserved | location=LmxM.08:1099939-1100352(+) | length=414 | sequence_SO=chromosome | mapping	414	368	282	86	84.4275	LmxM.08_29.0170 | organism=Leishmania_mexicana_MHOM/GT/2001/U1103 | product=hypothetical protein, conserved | location=LmxM.08:1099939-1100352(+) | length=414 | sequence_SO=chromosome |	414
LmxM.08_29.0180 | organism=Leishmania_mexicana_MHOM/GT/2001/U1103 | product=hypothetical protein, conserved | location=LmxM.08:1097627-1099237(+) | length=1611 | sequence_SO=chromosome | mapping	1611	1449	295	1154	88.0732	LmxM.08_29.0180 | organism=Leishmania_mexicana_MHOM/GT/2001/U1103 | product=hypothetical protein, conserved | location=LmxM.08:1097627-1099237(+) | length=1611 | sequence_SO=chromosome |	1611
LmxM.08_29.0190 | organism=Leishmania_mexicana_MHOM/GT/2001/U1103 | product=hypothetical protein, conserved | location=LmxM.08:1093435-1096494(+) | length=3060 | sequence_SO=chromosome | mapping	3060	2972	284	2688	95.4781	LmxM.08_29.0190 | organism=Leishmania_mexicana_MHOM/GT/2001/U1103 | product=hypothetical protein, conserved | location=LmxM.08:1093435-1096494(+) | length=3060 | sequence_SO=chromosome |	3060
LmxM.08_29.0200 | organism=Leishmania_mexicana_MHOM/GT/2001/U1103 | product=hypothetical protein, conserved | location=LmxM.08:1087491-1092224(+) | length=4734 | sequence_SO=chromosome | mapping	4734	4538	348	4190	94.4001	LmxM.08_29.0200 | organism=Leishmania_mexicana_MHOM/GT/2001/U1103 | product=hypothetical protein, conserved | location=LmxM.08:1087491-1092224(+) | length=4734 | sequence_SO=chromosome |	4734
LmxM.08_29.0210 | organism=Leishmania_mexicana_MHOM/GT/2001/U1103 | product=hypothetical protein, conserved | location=LmxM.08:1085555-1086358(+) | length=804 | sequence_SO=chromosome | mapping	804	791	335	456	95.3856	LmxM.08_29.0210 | organism=Leishmania_mexicana_MHOM/GT/2001/U1103 | product=hypothetical protein, conserved | location=LmxM.08:1085555-1086358(+) | length=804 | sequence_SO=chromosome |	804
LmxM.08_29.0220 | organism=Leishmania_mexicana_MHOM/GT/2001/U1103 | product=protein transport protein Sec24A, putative | location=LmxM.08:1081330-1084248(+) | length=2919 | sequence_SO=chromosome | mapping	2919	2639	291	2348	88.9089	LmxM.08_29.0220 | organism=Leishmania_mexicana_MHOM/GT/2001/U1103 | product=protein transport protein Sec24A, putative | location=LmxM.08:1081330-1084248(+) | length=2919 | sequence_SO=chromosome |	2919
LmxM.08_29.0230 | organism=Leishmania_mexicana_MHOM/GT/2001/U1103 | product=hypothetical protein, conserved | location=LmxM.08:1079715-1080362(+) | length=648 | sequence_SO=chromosome | mapping	648	601	315	286	89.8843	LmxM.08_29.0230 | organism=Leishmania_mexicana_MHOM/GT/2001/U1103 | product=hypothetical protein, conserved | location=LmxM.08:1079715-1080362(+) | length=648 | sequence_SO=chromosome |	648
LmxM.08_29.0240 | organism=Leishmania_mexicana_MHOM/GT/2001/U1103 | product=hypothetical protein, conserved | location=LmxM.08:1076756-1078369(+) | length=1614 | sequence_SO=chromosome | mapping	1614	1506	296	1210	91.4108	LmxM.08_29.0240 | organism=Leishmania_mexicana_MHOM/GT/2001/U1103 | product=hypothetical protein, conserved | location=LmxM.08:1076756-1078369(+) | length=1614 | sequence_SO=chromosome |	1614
LmxM.08_29.0250 | organism=Leishmania_mexicana_MHOM/GT/2001/U1103 | product=oxidase-like protein | location=LmxM.08:1070664-1071623(+) | length=960 | sequence_SO=chromosome | mapping	535	76	42	34	7.27708	LmxM.08_29.0250 | organism=Leishmania_mexicana_MHOM/GT/2001/U1103 | product=oxidase-like protein | location=LmxM.08:1070664-1071623(+) | length=960 | sequence_SO=chromosome |	960
LmxM.08_29.0251 | organism=Leishmania_mexicana_MHOM/GT/2001/U1103 | product=unspecified product | location=LmxM.08:1065177-1066136(+) | length=960 | sequence_SO=chromosome | mapping	960	556	168	388	56.5208	LmxM.08_29.0251 | organism=Leishmania_mexicana_MHOM/GT/2001/U1103 | product=unspecified product | location=LmxM.08:1065177-1066136(+) | length=960 | sequence_SO=chromosome |	960
LmxM.08_29.0260 | organism=Leishmania_mexicana_MHOM/GT/2001/U1103 | product=unspecified product | location=LmxM.08:1062647-1064434(+) | length=1788 | sequence_SO=chromosome | mapping	1788	1716	340	1376	94.6202	LmxM.08_29.0260 | organism=Leishmania_mexicana_MHOM/GT/2001/U1103 | product=unspecified product | location=LmxM.08:1062647-1064434(+) | length=1788 | sequence_SO=chromosome |	1788
LmxM.08_29.0270 | organism=Leishmania_mexicana_MHOM/GT/2001/U1103 | product=unspecified product | location=LmxM.08:1060919-1061647(+) | length=729 | sequence_SO=chromosome | mapping	729	672	280	392	89.2044	LmxM.08_29.0270 | organism=Leishmania_mexicana_MHOM/GT/2001/U1103 | product=unspecified product | location=LmxM.08:1060919-1061647(+) | length=729 | sequence_SO=chromosome |	729
LmxM.08_29.0280 | organism=Leishmania_mexicana_MHOM/GT/2001/U1103 | product=unspecified product | location=LmxM.08:1056781-1058256(+) | length=1476 | sequence_SO=chromosome | mapping	1476	1335	303	1032	88.6125	LmxM.08_29.0280 | organism=Leishmania_mexicana_MHOM/GT/2001/U1103 | product=unspecified product | location=LmxM.08:1056781-1058256(+) | length=1476 | sequence_SO=chromosome |	1476
LmxM.08_29.0290 | organism=Leishmania_mexicana_MHOM/GT/2001/U1103 | product=unspecified product | location=LmxM.08:1054365-1055513(+) | length=1149 | sequence_SO=chromosome | mapping	1149	1119	293	826	95.2924	LmxM.08_29.0290 | organism=Leishmania_mexicana_MHOM/GT/2001/U1103 | product=unspecified product | location=LmxM.08:1054365-1055513(+) | length=1149 | sequence_SO=chromosome |	1149
LmxM.08_29.0300 | organism=Leishmania_mexicana_MHOM/GT/2001/U1103 | product=unspecified product | location=LmxM.08:1052134-1053147(+) | length=1014 | sequence_SO=chromosome | mapping	1014	971	333	638	93.8274	LmxM.08_29.0300 | organism=Leishmania_mexicana_MHOM/GT/2001/U1103 | product=unspecified product | location=LmxM.08:1052134-1053147(+) | length=1014 | sequence_SO=chromosome |	1014
LmxM.08_29.0320 | organism=Leishmania_mexicana_MHOM/GT/2001/U1103 | product=hypothetical protein, conserved | location=LmxM.08:1045939-1046988(+) | length=1050 | sequence_SO=chromosome | mapping	1050	1014	318	696	94.2562	LmxM.08_29.0320 | organism=Leishmania_mexicana_MHOM/GT/2001/U1103 | product=hypothetical protein, conserved | location=LmxM.08:1045939-1046988(+) | length=1050 | sequence_SO=chromosome |	1050
LmxM.08_29.0330 | organism=Leishmania_mexicana_MHOM/GT/2001/U1103 | product=hypothetical protein, conserved | location=LmxM.08:1043997-1045166(+) | length=1170 | sequence_SO=chromosome | mapping	1170	1189	335	854	99.3103	LmxM.08_29.0330 | organism=Leishmania_mexicana_MHOM/GT/2001/U1103 | product=hypothetical protein, conserved | location=LmxM.08:1043997-1045166(+) | length=1170 | sequence_SO=chromosome |	1170
LmxM.08_29.0340 | organism=Leishmania_mexicana_MHOM/GT/2001/U1103 | product=UBX domain-containing protein | location=LmxM.08:1041731-1043017(+) | length=1287 | sequence_SO=chromosome | mapping	1287	1180	278	902	89.892	LmxM.08_29.0340 | organism=Leishmania_mexicana_MHOM/GT/2001/U1103 | product=UBX domain-containing protein | location=LmxM.08:1041731-1043017(+) | length=1287 | sequence_SO=chromosome |	1287
LmxM.08_29.0350 | organism=Leishmania_mexicana_MHOM/GT/2001/U1103 | product=hypothetical protein, conserved | location=LmxM.08:1035890-1039993(+) | length=4104 | sequence_SO=chromosome | mapping	4104	4043	373	3670	97.3385	LmxM.08_29.0350 | organism=Leishmania_mexicana_MHOM/GT/2001/U1103 | product=hypothetical protein, conserved | location=LmxM.08:1035890-1039993(+) | length=4104 | sequence_SO=chromosome |	4104
LmxM.08_29.0360 | organism=Leishmania_mexicana_MHOM/GT/2001/U1103 | product=hypothetical protein, conserved | location=LmxM.08:1034299-1034823(+) | length=525 | sequence_SO=chromosome | mapping	525	417	283	134	76.44	LmxM.08_29.0360 | organism=Leishmania_mexicana_MHOM/GT/2001/U1103 | product=hypothetical protein, conserved | location=LmxM.08:1034299-1034823(+) | length=525 | sequence_SO=chromosome |	525
LmxM.08_29.0370 | organism=Leishmania_mexicana_MHOM/GT/2001/U1103 | product=protein kinase-like protein | location=LmxM.08:1026849-1031018(+) | length=4170 | sequence_SO=chromosome | mapping	4170	4030	310	3720	95.2844	LmxM.08_29.0370 | organism=Leishmania_mexicana_MHOM/GT/2001/U1103 | product=protein kinase-like protein | location=LmxM.08:1026849-1031018(+) | length=4170 | sequence_SO=chromosome |	4170
LmxM.08_29.0380 | organism=Leishmania_mexicana_MHOM/GT/2001/U1103 | product=hypothetical protein, conserved | location=LmxM.08:1021759-1024653(+) | length=2895 | sequence_SO=chromosome | mapping	2895	2846	334	2512	96.6902	LmxM.08_29.0380 | organism=Leishmania_mexicana_MHOM/GT/2001/U1103 | product=hypothetical protein, conserved | location=LmxM.08:1021759-1024653(+) | length=2895 | sequence_SO=chromosome |	2895
LmxM.08_29.0390 | organism=Leishmania_mexicana_MHOM/GT/2001/U1103 | product=RNA binding protein, putative | location=LmxM.08:1019348-1020130(+) | length=783 | sequence_SO=chromosome | mapping	783	787	303	484	97.0307	LmxM.08_29.0390 | organism=Leishmania_mexicana_MHOM/GT/2001/U1103 | product=RNA binding protein, putative | location=LmxM.08:1019348-1020130(+) | length=783 | sequence_SO=chromosome |	783
LmxM.08_29.0400 | organism=Leishmania_mexicana_MHOM/GT/2001/U1103 | product=hypothetical protein, conserved | location=LmxM.08:1017969-1018469(+) | length=501 | sequence_SO=chromosome | mapping	501	491	311	180	93.9301	LmxM.08_29.0400 | organism=Leishmania_mexicana_MHOM/GT/2001/U1103 | product=hypothetical protein, conserved | location=LmxM.08:1017969-1018469(+) | length=501 | sequence_SO=chromosome |	501
LmxM.08_29.0410 | organism=Leishmania_mexicana_MHOM/GT/2001/U1103 | product=hypothetical protein, conserved | location=LmxM.08:1015606-1017336(+) | length=1731 | sequence_SO=chromosome | mapping	1731	1550	300	1250	87.833	LmxM.08_29.0410 | organism=Leishmania_mexicana_MHOM/GT/2001/U1103 | product=hypothetical protein, conserved | location=LmxM.08:1015606-1017336(+) | length=1731 | sequence_SO=chromosome |	1731
LmxM.08_29.0420 | organism=Leishmania_mexicana_MHOM/GT/2001/U1103 | product=hypothetical protein, conserved | location=LmxM.08:1013358-1014572(+) | length=1215 | sequence_SO=chromosome | mapping	1215	1224	350	874	97.7761	LmxM.08_29.0420 | organism=Leishmania_mexicana_MHOM/GT/2001/U1103 | product=hypothetical protein, conserved | location=LmxM.08:1013358-1014572(+) | length=1215 | sequence_SO=chromosome |	1215
LmxM.08_29.0430 | organism=Leishmania_mexicana_MHOM/GT/2001/U1103 | product=hypothetical protein, conserved | location=LmxM.08:1010502-1012196(+) | length=1695 | sequence_SO=chromosome | mapping	1695	1599	327	1272	92.8425	LmxM.08_29.0430 | organism=Leishmania_mexicana_MHOM/GT/2001/U1103 | product=hypothetical protein, conserved | location=LmxM.08:1010502-1012196(+) | length=1695 | sequence_SO=chromosome |	1695
LmxM.08_29.0440 | organism=Leishmania_mexicana_MHOM/GT/2001/U1103 | product=hypothetical protein, conserved | location=LmxM.08:1004378-1005520(+) | length=1143 | sequence_SO=chromosome | mapping	1143	1220	362	858	104.269	LmxM.08_29.0440 | organism=Leishmania_mexicana_MHOM/GT/2001/U1103 | product=hypothetical protein, conserved | location=LmxM.08:1004378-1005520(+) | length=1143 | sequence_SO=chromosome |	1143
LmxM.08_29.0450 | organism=Leishmania_mexicana_MHOM/GT/2001/U1103 | product=hypothetical protein, conserved | location=LmxM.08:1001433-1003382(+) | length=1950 | sequence_SO=chromosome | mapping	1950	1887	319	1568	95.2385	LmxM.08_29.0450 | organism=Leishmania_mexicana_MHOM/GT/2001/U1103 | product=hypothetical protein, conserved | location=LmxM.08:1001433-1003382(+) | length=1950 | sequence_SO=chromosome |	1950
LmxM.08_29.0460 | organism=Leishmania_mexicana_MHOM/GT/2001/U1103 | product=hypothetical protein, conserved | location=LmxM.08:996216-998279(+) | length=2064 | sequence_SO=chromosome | mapping	2064	1987	333	1654	94.6618	LmxM.08_29.0460 | organism=Leishmania_mexicana_MHOM/GT/2001/U1103 | product=hypothetical protein, conserved | location=LmxM.08:996216-998279(+) | length=2064 | sequence_SO=chromosome |	2064
LmxM.08_29.0470 | organism=Leishmania_mexicana_MHOM/GT/2001/U1103 | product=hypothetical protein, conserved | location=LmxM.08:990800-992146(+) | length=1347 | sequence_SO=chromosome | mapping	1347	1286	324	962	93.075	LmxM.08_29.0470 | organism=Leishmania_mexicana_MHOM/GT/2001/U1103 | product=hypothetical protein, conserved | location=LmxM.08:990800-992146(+) | length=1347 | sequence_SO=chromosome |	1347
LmxM.08_29.0480partial | organism=Leishmania_mexicana_MHOM/GT/2001/U1103 | product=unspecified product | location=LmxM.08:988508-989257(+) | length=750 | sequence_SO=chromosome | mapping	750	747	367	380	96.92	LmxM.08_29.0480partial | organism=Leishmania_mexicana_MHOM/GT/2001/U1103 | product=unspecified product | location=LmxM.08:988508-989257(+) | length=750 | sequence_SO=chromosome |	750
LmxM.08_29.0490 | organism=Leishmania_mexicana_MHOM/GT/2001/U1103 | product=hypothetical protein, conserved | location=LmxM.08:986190-987284(+) | length=1095 | sequence_SO=chromosome | mapping	1095	1017	335	682	90.2667	LmxM.08_29.0490 | organism=Leishmania_mexicana_MHOM/GT/2001/U1103 | product=hypothetical protein, conserved | location=LmxM.08:986190-987284(+) | length=1095 | sequence_SO=chromosome |	1095
LmxM.08_29.0500 | organism=Leishmania_mexicana_MHOM/GT/2001/U1103 | product=hypothetical protein, unknown function | location=LmxM.08:976860-980429(+) | length=3570 | sequence_SO=chromosome | mapping	3570	3459	345	3114	95.3745	LmxM.08_29.0500 | organism=Leishmania_mexicana_MHOM/GT/2001/U1103 | product=hypothetical protein, unknown function | location=LmxM.08:976860-980429(+) | length=3570 | sequence_SO=chromosome |	3570
LmxM.08_29.0510 | organism=Leishmania_mexicana_MHOM/GT/2001/U1103 | product=cofilin-like protein | location=LmxM.08:969085-969504(+) | length=420 | sequence_SO=chromosome | mapping	420	344	268	76	78.4833	LmxM.08_29.0510 | organism=Leishmania_mexicana_MHOM/GT/2001/U1103 | product=cofilin-like protein | location=LmxM.08:969085-969504(+) | length=420 | sequence_SO=chromosome |	420
LmxM.08_29.0520 | organism=Leishmania_mexicana_MHOM/GT/2001/U1103 | product=hypothetical protein, conserved | location=LmxM.08:967663-968361(+) | length=699 | sequence_SO=chromosome | mapping	699	626	324	302	87.4592	LmxM.08_29.0520 | organism=Leishmania_mexicana_MHOM/GT/2001/U1103 | product=hypothetical protein, conserved | location=LmxM.08:967663-968361(+) | length=699 | sequence_SO=chromosome |	699
LmxM.08_29.0530 | organism=Leishmania_mexicana_MHOM/GT/2001/U1103 | product=hypothetical protein, conserved | location=LmxM.08:956901-965828(+) | length=8928 | sequence_SO=chromosome | mapping	8928	8631	421	8210	95.4064	LmxM.08_29.0530 | organism=Leishmania_mexicana_MHOM/GT/2001/U1103 | product=hypothetical protein, conserved | location=LmxM.08:956901-965828(+) | length=8928 | sequence_SO=chromosome |	8928
LmxM.08_29.0540 | organism=Leishmania_mexicana_MHOM/GT/2001/U1103 | product=hypothetical protein, conserved | location=LmxM.08:954148-955656(+) | length=1509 | sequence_SO=chromosome | mapping	1509	1325	317	1008	86.1803	LmxM.08_29.0540 | organism=Leishmania_mexicana_MHOM/GT/2001/U1103 | product=hypothetical protein, conserved | location=LmxM.08:954148-955656(+) | length=1509 | sequence_SO=chromosome |	1509
LmxM.08_29.0550 | organism=Leishmania_mexicana_MHOM/GT/2001/U1103 | product=hypothetical protein, conserved | location=LmxM.08:950337-952976(+) | length=2640 | sequence_SO=chromosome | mapping	2640	2273	321	1952	84.7936	LmxM.08_29.0550 | organism=Leishmania_mexicana_MHOM/GT/2001/U1103 | product=hypothetical protein, conserved | location=LmxM.08:950337-952976(+) | length=2640 | sequence_SO=chromosome |	2640
LmxM.08_29.0555 | organism=Leishmania_mexicana_MHOM/GT/2001/U1103 | product=hypothetical protein | location=LmxM.08:947162-947923(+) | length=762 | sequence_SO=chromosome | mapping	762	1362	694	668	171.808	LmxM.08_29.0555 | organism=Leishmania_mexicana_MHOM/GT/2001/U1103 | product=hypothetical protein | location=LmxM.08:947162-947923(+) | length=762 | sequence_SO=chromosome |	762
LmxM.08_29.0560 | organism=Leishmania_mexicana_MHOM/GT/2001/U1103 | product=hypothetical protein, conserved | location=LmxM.08:945468-946685(+) | length=1218 | sequence_SO=chromosome | mapping	1218	1202	300	902	96.4885	LmxM.08_29.0560 | organism=Leishmania_mexicana_MHOM/GT/2001/U1103 | product=hypothetical protein, conserved | location=LmxM.08:945468-946685(+) | length=1218 | sequence_SO=chromosome |	1218
LmxM.08_29.0570 | organism=Leishmania_mexicana_MHOM/GT/2001/U1103 | product=hypothetical protein, conserved | location=LmxM.08:942140-944671(+) | length=2532 | sequence_SO=chromosome | mapping	2532	2489	349	2140	96.7441	LmxM.08_29.0570 | organism=Leishmania_mexicana_MHOM/GT/2001/U1103 | product=hypothetical protein, conserved | location=LmxM.08:942140-944671(+) | length=2532 | sequence_SO=chromosome |	2532
LmxM.08_29.0580 | organism=Leishmania_mexicana_MHOM/GT/2001/U1103 | product=hypothetical protein, conserved | location=LmxM.08:939457-940905(+) | length=1449 | sequence_SO=chromosome | mapping	1449	1433	315	1118	96.7861	LmxM.08_29.0580 | organism=Leishmania_mexicana_MHOM/GT/2001/U1103 | product=hypothetical protein, conserved | location=LmxM.08:939457-940905(+) | length=1449 | sequence_SO=chromosome |	1449
LmxM.08_29.0590 | organism=Leishmania_mexicana_MHOM/GT/2001/U1103 | product=DNA repair helicase, putative | location=LmxM.08:935240-938551(+) | length=3312 | sequence_SO=chromosome | mapping	3312	3393	331	3062	101.174	LmxM.08_29.0590 | organism=Leishmania_mexicana_MHOM/GT/2001/U1103 | product=DNA repair helicase, putative | location=LmxM.08:935240-938551(+) | length=3312 | sequence_SO=chromosome |	3312
LmxM.08_29.0600 | organism=Leishmania_mexicana_MHOM/GT/2001/U1103 | product=hypothetical protein, conserved | location=LmxM.08:932642-934378(+) | length=1737 | sequence_SO=chromosome | mapping	1737	1639	315	1324	92.8877	LmxM.08_29.0600 | organism=Leishmania_mexicana_MHOM/GT/2001/U1103 | product=hypothetical protein, conserved | location=LmxM.08:932642-934378(+) | length=1737 | sequence_SO=chromosome |	1737
LmxM.08_29.0610 | organism=Leishmania_mexicana_MHOM/GT/2001/U1103 | product=hypothetical protein, conserved | location=LmxM.08:929288-931195(+) | length=1908 | sequence_SO=chromosome | mapping	1908	1777	325	1452	90.9492	LmxM.08_29.0610 | organism=Leishmania_mexicana_MHOM/GT/2001/U1103 | product=hypothetical protein, conserved | location=LmxM.08:929288-931195(+) | length=1908 | sequence_SO=chromosome |	1908
LmxM.08_29.0620 | organism=Leishmania_mexicana_MHOM/GT/2001/U1103 | product=ABC transporter, putative | location=LmxM.08:920156-925759(+) | length=5604 | sequence_SO=chromosome | mapping	5604	5219	277	4942	91.987	LmxM.08_29.0620 | organism=Leishmania_mexicana_MHOM/GT/2001/U1103 | product=ABC transporter, putative | location=LmxM.08:920156-925759(+) | length=5604 | sequence_SO=chromosome |	5604
LmxM.08_29.0630 | organism=Leishmania_mexicana_MHOM/GT/2001/U1103 | product=BET1-like protein, putative | location=LmxM.08:914446-914865(+) | length=420 | sequence_SO=chromosome | mapping	420	365	281	84	82.4952	LmxM.08_29.0630 | organism=Leishmania_mexicana_MHOM/GT/2001/U1103 | product=BET1-like protein, putative | location=LmxM.08:914446-914865(+) | length=420 | sequence_SO=chromosome |	420
LmxM.08_29.0640 | organism=Leishmania_mexicana_MHOM/GT/2001/U1103 | product=hypothetical protein, conserved | location=LmxM.08:912956-913750(+) | length=795 | sequence_SO=chromosome | mapping	795	709	287	422	87.4013	LmxM.08_29.0640 | organism=Leishmania_mexicana_MHOM/GT/2001/U1103 | product=hypothetical protein, conserved | location=LmxM.08:912956-913750(+) | length=795 | sequence_SO=chromosome |	795
LmxM.08_29.0650 | organism=Leishmania_mexicana_MHOM/GT/2001/U1103 | product=phosphate transporter, putative | location=LmxM.08:910665-912074(+) | length=1410 | sequence_SO=chromosome | mapping	1410	1163	265	898	80.6284	LmxM.08_29.0650 | organism=Leishmania_mexicana_MHOM/GT/2001/U1103 | product=phosphate transporter, putative | location=LmxM.08:910665-912074(+) | length=1410 | sequence_SO=chromosome |	1410
LmxM.08_29.0660 | organism=Leishmania_mexicana_MHOM/GT/2001/U1103 | product=flagellar radial spoke protein-like, putative | location=LmxM.08:906488-908254(+) | length=1767 | sequence_SO=chromosome | mapping	1767	1584	282	1302	87.7176	LmxM.08_29.0660 | organism=Leishmania_mexicana_MHOM/GT/2001/U1103 | product=flagellar radial spoke protein-like, putative | location=LmxM.08:906488-908254(+) | length=1767 | sequence_SO=chromosome |	1767
LmxM.08_29.0670 | organism=Leishmania_mexicana_MHOM/GT/2001/U1103 | product=hypothetical protein, conserved | location=LmxM.08:904953-905366(+) | length=414 | sequence_SO=chromosome | mapping	414	367	277	90	84.43	LmxM.08_29.0670 | organism=Leishmania_mexicana_MHOM/GT/2001/U1103 | product=hypothetical protein, conserved | location=LmxM.08:904953-905366(+) | length=414 | sequence_SO=chromosome |	414
LmxM.08_29.0680 | organism=Leishmania_mexicana_MHOM/GT/2001/U1103 | product=RNA-binding protein, putative | location=LmxM.08:901883-904201(+) | length=2319 | sequence_SO=chromosome | mapping	2319	2065	297	1768	87.4847	LmxM.08_29.0680 | organism=Leishmania_mexicana_MHOM/GT/2001/U1103 | product=RNA-binding protein, putative | location=LmxM.08:901883-904201(+) | length=2319 | sequence_SO=chromosome |	2319
LmxM.08_29.0690 | organism=Leishmania_mexicana_MHOM/GT/2001/U1103 | product=hypothetical protein, conserved | location=LmxM.08:900348-901184(+) | length=837 | sequence_SO=chromosome | mapping	837	789	279	510	91.7933	LmxM.08_29.0690 | organism=Leishmania_mexicana_MHOM/GT/2001/U1103 | product=hypothetical protein, conserved | location=LmxM.08:900348-901184(+) | length=837 | sequence_SO=chromosome |	837
LmxM.08_29.0700 | organism=Leishmania_mexicana_MHOM/GT/2001/U1103 | product=hypothetical protein, conserved | location=LmxM.08:896663-898819(+) | length=2157 | sequence_SO=chromosome | mapping	2157	2089	329	1760	95.2809	LmxM.08_29.0700 | organism=Leishmania_mexicana_MHOM/GT/2001/U1103 | product=hypothetical protein, conserved | location=LmxM.08:896663-898819(+) | length=2157 | sequence_SO=chromosome |	2157
LmxM.08_29.0710 | organism=Leishmania_mexicana_MHOM/GT/2001/U1103 | product=hypothetical protein, conserved | location=LmxM.08:893100-895667(+) | length=2568 | sequence_SO=chromosome | mapping	2568	2475	339	2136	94.8516	LmxM.08_29.0710 | organism=Leishmania_mexicana_MHOM/GT/2001/U1103 | product=hypothetical protein, conserved | location=LmxM.08:893100-895667(+) | length=2568 | sequence_SO=chromosome |	2568
LmxM.08_29.0720 | organism=Leishmania_mexicana_MHOM/GT/2001/U1103 | product=Elongation factor Ts, mitochondrial, putative (EF-Ts) | location=LmxM.08:891013-891843(+) | length=831 | sequence_SO=chromosome | mapping	831	761	295	466	88.7978	LmxM.08_29.0720 | organism=Leishmania_mexicana_MHOM/GT/2001/U1103 | product=Elongation factor Ts, mitochondrial, putative (EF-Ts) | location=LmxM.08:891013-891843(+) | length=831 | sequence_SO=chromosome |	831
LmxM.08_29.0730 | organism=Leishmania_mexicana_MHOM/GT/2001/U1103 | product=hypothetical protein, conserved | location=LmxM.08:888083-888760(+) | length=678 | sequence_SO=chromosome | mapping	678	671	325	346	96.1549	LmxM.08_29.0730 | organism=Leishmania_mexicana_MHOM/GT/2001/U1103 | product=hypothetical protein, conserved | location=LmxM.08:888083-888760(+) | length=678 | sequence_SO=chromosome |	678
LmxM.08_29.0740 | organism=Leishmania_mexicana_MHOM/GT/2001/U1103 | product=peroxisomal targeting signal type 2 receptor, putative | location=LmxM.08:885533-886654(+) | length=1122 | sequence_SO=chromosome | mapping	1122	1096	352	744	94.8672	LmxM.08_29.0740 | organism=Leishmania_mexicana_MHOM/GT/2001/U1103 | product=peroxisomal targeting signal type 2 receptor, putative | location=LmxM.08:885533-886654(+) | length=1122 | sequence_SO=chromosome |	1122
LmxM.08_29.0750 | organism=Leishmania_mexicana_MHOM/GT/2001/U1103 | product=U3 small nucleolar ribonucleoprotein protein MPP10, putative | location=LmxM.08:880214-882253(+) | length=2040 | sequence_SO=chromosome | mapping	2040	1903	343	1560	91.576	LmxM.08_29.0750 | organism=Leishmania_mexicana_MHOM/GT/2001/U1103 | product=U3 small nucleolar ribonucleoprotein protein MPP10, putative | location=LmxM.08:880214-882253(+) | length=2040 | sequence_SO=chromosome |	2040
LmxM.08_29.0760 | organism=Leishmania_mexicana_MHOM/GT/2001/U1103 | product=heat shock protein 90, putative,lipophosphoglycan biosynthetic protein, putative,glucose regulated protein 94, putative (LPG3) | location=LmxM.08:875981-878296(+) | length=2316 | sequence_SO=chromosome | mapping	2316	2425	355	2070	103.189	LmxM.08_29.0760 | organism=Leishmania_mexicana_MHOM/GT/2001/U1103 | product=heat shock protein 90, putative,lipophosphoglycan biosynthetic protein, putative,glucose regulated protein 94, putative (LPG3) | location=LmxM.08:875981-878296(+) | length=2316 | sequence_SO=chromosome |	2316
LmxM.08_29.0770 | organism=Leishmania_mexicana_MHOM/GT/2001/U1103 | product=hypothetical protein, conserved | location=LmxM.08:874236-874823(+) | length=588 | sequence_SO=chromosome | mapping	588	547	341	206	89.2211	LmxM.08_29.0770 | organism=Leishmania_mexicana_MHOM/GT/2001/U1103 | product=hypothetical protein, conserved | location=LmxM.08:874236-874823(+) | length=588 | sequence_SO=chromosome |	588
LmxM.08_29.0780 | organism=Leishmania_mexicana_MHOM/GT/2001/U1103 | product=U-box domain protein, putative | location=LmxM.08:869366-871171(+) | length=1806 | sequence_SO=chromosome | mapping	1806	1817	363	1454	98.7481	LmxM.08_29.0780 | organism=Leishmania_mexicana_MHOM/GT/2001/U1103 | product=U-box domain protein, putative | location=LmxM.08:869366-871171(+) | length=1806 | sequence_SO=chromosome |	1806
LmxM.08_29.0790 | organism=Leishmania_mexicana_MHOM/GT/2001/U1103 | product=hypothetical protein, conserved | location=LmxM.08:862629-867398(+) | length=4770 | sequence_SO=chromosome | mapping	4770	4521	319	4202	93.6216	LmxM.08_29.0790 | organism=Leishmania_mexicana_MHOM/GT/2001/U1103 | product=hypothetical protein, conserved | location=LmxM.08:862629-867398(+) | length=4770 | sequence_SO=chromosome |	4770
LmxM.08_29.0795 | organism=Leishmania_mexicana_MHOM/GT/2001/U1103 | product=tuzin (pseudogene) | location=LmxM.08:1445846-1446058(+) | length=213 | sequence_SO=chromosome | mapping	213	165	161	4	70.6479	LmxM.08_29.0795 | organism=Leishmania_mexicana_MHOM/GT/2001/U1103 | product=tuzin (pseudogene) | location=LmxM.08:1445846-1446058(+) | length=213 | sequence_SO=chromosome |	213
LmxM.08_29.0800 | organism=Leishmania_mexicana_MHOM/GT/2001/U1103 | product=hypothetical protein, conserved | location=LmxM.08:859707-861728(+) | length=2022 | sequence_SO=chromosome | mapping	2022	1843	287	1556	89.5509	LmxM.08_29.0800 | organism=Leishmania_mexicana_MHOM/GT/2001/U1103 | product=hypothetical protein, conserved | location=LmxM.08:859707-861728(+) | length=2022 | sequence_SO=chromosome |	2022
[truncated: 7,277 more rows]

## Sheet: Sheet1
Name	Consensus length	Total read count	Single reads	Reads in pairs	Average coverage	Reference sequence	Reference length	aver gene/aver chrom
[truncated: 363 more rows]

## Sheet: 22 chrom
Name	Consensus length	Total read count	Single reads	Reads in pairs	Average coverage	Reference sequence	Reference length			Name	Average coverage
[truncated: 173 more rows]
