# Supplementary material for: CRISPR/Cas9 in Leishmania mexicana: A case study of LmxBTN1
Source: PLoS One. 2018 Feb 13;13(2):e0192723. doi: 10.1371/journal.pone.0192723 (PMC5811015; doi:10.1371/journal.pone.0192723)
Supplement: S4 Table — Number of detected morphotypes listed according to Leishmania strains and three independent experiments. LN, long nectomonade; SN, short nectomonade; ME, metacyclic promastigote. (XLSX) [file pone.0192723.s013.xlsx]

## Sheet: List1
	WT				Cas9				KO
	exp. 1	exp. 2	exp. 3	total	exp. 1	exp. 2	exp. 3	total	exp. 1	exp. 2	exp. 3	total
LN	15	21	36	72	8	14	41	63	36	17	50	103
SN	111	90	119	320	133	130	103	366	119	132	120	371
ME	54	69	25	148	39	36	36	111	25	31	10	66
total number of cells	180	180	180	540	180	180	180	540	180	180	180	540
